# Supplementary material for: Type I and II PRMTs inversely regulate post-transcriptional intron detention through Sm and CHTOP methylation
Source: eLife. 2022 Jan 5;11:e72867. doi: 10.7554/eLife.72867 (PMC8765754; doi:10.7554/eLife.72867)
Supplement: Supplementary file 1. — Enrichment and relative abundance of proteins in chromatin or chromatin-associated poly(A) RNA following treatment with DMSO, GSK591, or MS023 for two days. [file elife-72867-supp1.xlsx]

## Sheet: Input_DMSO_vs_GSK591
Accession	Description	Gene Symbol	Annotation	Biological Process	Cellular Component	Molecular Function	Chromosome	KEGG Pathways	Reactome Pathways	WikiPathways	Quantification	Input_DMSO_A1	Input_DMSO_B1	Input_DMSO_C1	Input_DMSO_D1	Input_GSK_A2	Input_GSK_B2	Input_GSK_C2	Input_GSK_D2	Input_MS023_A3	Input_MS023_B3	Input_MS023_C3	Input_MS023_D3	log2	Input_DMSO_A1	Input_DMSO_B1	Input_DMSO_C1	Input_DMSO_D1	Input_GSK_A2	Input_GSK_B2	Input_GSK_C2	Input_GSK_D2	Input_MS023_A3	Input_MS023_B3	Input_MS023_C3	Input_MS023_D3	Normalize	Input_DMSO_A1	Input_DMSO_B1	Input_DMSO_C1	Input_DMSO_D1	Input_GSK_A2	Input_GSK_B2	Input_GSK_C2	Input_GSK_D2	Input_MS023_A3	Input_MS023_B3	Input_MS023_C3	Input_MS023_D3
Q14749	Glycine N-methyltransferase	GNMT		cell organization and biogenesis;metabolic process;regulation of biological process	cytoplasm;cytosol	catalytic activity;protein binding	6	Glycine, serine and threonine metabolism	Metabolism of ingested SeMet, Sec, MeSec into H2Se; Glyoxylate metabolism and glycine degradation	One carbon metabolism and related pathways		7.0627e+08	5.26526e+08	4.19026e+08	589476	599415	3.49521e+06	5.30618e+06	593860	578738	1.00072e+06	483967	501392		29.3956	28.9719	28.6425	19.1691	19.1932	21.7369	22.3392	19.1798	19.1426	19.9326	18.8845	18.9356		10.2493	9.68839	9.35608	0.948774	0.43652	2.93625	3.29504	1.15954	0.486012	0.956408	0.137917	0.927898
Q02539	Histone H1.1	HIST1H1A		cell organization and biogenesis;regulation of biological process	cell surface;chromosome;nucleus	DNA binding;protein binding	6		Formation of Senescence-Associated Heterochromatin Foci (SAHF); Activation of DNA fragmentation factor			5.69366e+06	4.07082e+06	2.94662e+06	80175.6	129979	115963	98967.3	92908	151229	98246.1	60396.2	80505.5		22.4409	21.9569	21.4906	16.2909	16.9879	16.8233	16.5947	16.5035	17.2064	16.5841	15.8822	16.2968		3.29456	2.67335	2.20424	-1.92942	-1.76876	-1.97739	-2.44954	-1.51671	-1.45016	-2.39209	-2.86446	-1.71088
Q9HAB8	Phosphopantothenate--cysteine ligase	PPCS		metabolic process	cytosol	catalytic activity	1	Pantothenate and CoA biosynthesis; Metabolic pathways	Coenzyme A biosynthesis			298013	256730	128855											18.185	17.9699	16.9754											-0.961349	-1.31365	-2.311
O75955	Flotillin-1	FLOT1		cell organization and biogenesis;regulation of biological process;response to stimulus;transport	cytoskeleton;endosome;membrane	protein binding	6; CHR_HSCHR6_MHC_DBB_CTG1; CHR_HSCHR6_MHC_SSTO_CTG1; CHR_HSCHR6_MHC_QBL_CTG1; CHR_HSCHR6_MHC_COX_CTG1	Insulin signaling pathway	Synaptic adhesion-like molecules	Angiopoietin Like Protein 8 Regulatory Pathway; Insulin Signaling		853982	942900	733718	741749	386193	148339	477036	111925	410839	172416	850565	310976		19.7038	19.8467	19.4849	19.5006	18.559	17.1785	18.8637	16.7722	18.6482	17.3955	19.6981	18.2464		0.557484	0.563206	0.19848	1.28027	-0.197714	-1.62216	-0.180465	-1.24805	-0.00832417	-1.58067	0.951431	0.23876
P35613	Basigin	BSG		cell organization and biogenesis;cellular component movement;metabolic process;regulation of biological process;response to stimulus;transport	membrane;mitochondrion	protein binding;transporter activity	19		Integrin cell surface interactions; Proton-coupled monocarboxylate transport; Basigin interactions; Degradation of the extracellular matrix; Pyruvate metabolism	Matrix Metalloproteinases		1.06081e+06	1.40421e+06	1.30167e+06	470943	439130	456670	699414	240233	576897	606022	865029	301893		20.0167	20.4213	20.3119	18.8452	18.7443	18.8008	19.4158	17.8741	19.138	19.209	19.7224	18.2037		0.870374	1.13779	1.02554	0.624892	-0.0123872	9.55199e-05	0.371582	-0.146145	0.481415	0.232805	0.975758	0.195995
Q9NY12	H/ACA ribonucleoprotein complex subunit 1	GAR1		cell organization and biogenesis;metabolic process	nucleus	protein binding;RNA binding	4	Ribosome biogenesis in eukaryotes	rRNA modification in the nucleus and cytosol			2.92072e+06	2.36002e+06	3.10621e+06	252166	392913	370924	348634	241791	773826	772683	619756	465903		21.4779	21.1704	21.5667	17.944	18.5839	18.5008	18.4114	17.8834	19.5616	19.5595	19.2413	18.8297		2.33153	1.88683	2.28034	-0.276286	-0.172824	-0.299931	-0.632852	-0.136824	0.90511	0.583312	0.49471	0.821989
P15151	Poliovirus receptor	PVR		cell organization and biogenesis;regulation of biological process	cell surface;cytoplasm;extracellular;membrane	protein binding;receptor activity	19	Cell adhesion molecules (CAMs)	Immunoregulatory interactions between a Lymphoid and a non-Lymphoid cell; Nectin/Necl trans heterodimerization			1.15561e+06	1.02544e+06	1.35126e+06	319181	369486	287845	553890	164152	1.14488e+06	1.17728e+06	1.56461e+06	644478		20.1402	19.9678	20.3659	18.284	18.4952	18.1349	19.0792	17.3247	20.1268	20.167	20.5774	19.2978		0.993865	0.684272	1.07948	0.0637133	-0.261516	-0.665763	0.0350338	-0.695548	1.47023	1.19082	1.83074	1.29009
Q9HAF1	Chromatin modification-related protein MEAF6	MEAF6		cell organization and biogenesis;metabolic process;regulation of biological process	chromosome;cytosol;nucleus	protein binding	1		HATs acetylate histones; Regulation of TP53 Activity through Acetylation			143591	139720	115380											17.1316	17.0922	16.816											-2.01475	-2.19136	-2.47036
Q96HY6	DDRGK domain-containing protein 1	DDRGK1		regulation of biological process;response to stimulus	cytoplasm;endoplasmic reticulum;membrane	protein binding	20					302048	218841	288719	74629.7		119307	155334		53325.1	140336	82269.5			18.2044	17.7395	18.1393	16.1875		16.8643	17.245		15.7025	17.0985	16.3281			-0.941944	-1.54401	-1.14708	-2.03284		-1.93637	-1.79919		-2.95401	-1.87768	-2.41856
Q9BSF4	Mitochondrial import inner membrane translocase subunit Tim29	C19orf52; TIMM29		cell organization and biogenesis;transport	membrane;mitochondrion	protein binding	19					461831	493146	467088	86859.6	78550.1	186603	86491	81137.1	99859.8	217759	136655	113100		18.817	18.9117	18.8333	16.4064	16.2613	17.5096	16.4003	16.3081	16.6076	17.7324	17.0602	16.7872		-0.329359	-0.371885	-0.45305	-1.8139	-2.49535	-1.29109	-2.64394	-1.71215	-2.04892	-1.24383	-1.68645	-1.22045
Q7Z7F7	39S ribosomal protein L55, mitochondrial	MRPL55		cell organization and biogenesis;metabolic process	membrane;mitochondrion;ribosome	structural molecule activity	1		Mitochondrial translation initiation; Mitochondrial translation elongation; Mitochondrial translation termination			397720	317631	303132	105050	103041	154823	131718	57666.6	98869.4	161935	111965	77103.7		18.6014	18.277	18.2096	16.6807	16.6529	17.2403	17.0071	15.8154	16.5932	17.3051	16.7727	16.2345		-0.544969	-1.00655	-1.0768	-1.53958	-2.10381	-1.56043	-2.03711	-2.20477	-2.0633	-1.67115	-1.97394	-1.77317
Q9H9L3	Interferon-stimulated 20 kDa exonuclease-like 2	ISG20L2		metabolic process	nucleus	catalytic activity;protein binding;RNA binding	1		Major pathway of rRNA processing in the nucleolus and cytosol			107150	255818	242088	38638	73427.3	49184.7	33705.8	23154.2	52021.8	51390.1	70054.4	25424.5		16.7093	17.9648	17.8852	15.2377	16.164	15.5859	15.0407	14.499	15.6668	15.6492	16.0962	14.6339		-2.43708	-1.31878	-1.40121	-2.98257	-2.59265	-3.21478	-4.0035	-3.52124	-2.98971	-3.327	-2.65044	-3.37375
Q9NUT2	ATP-binding cassette sub-family B member 8, mitochondrial	ABCB8		transport	membrane;mitochondrion;nucleus	catalytic activity;nucleotide binding;transporter activity	7	ABC transporters	Mitochondrial ABC transporters			208934	274978	358897	159111	89492.4	130698	144258	83999.2	124514	225052	233261	128884		17.6727	18.069	18.4532	17.2797	16.4495	16.9959	17.1383	16.3581	16.9259	17.7799	17.8316	16.9757		-1.47368	-1.21459	-0.833176	-0.940628	-2.3072	-1.80482	-1.90591	-1.66213	-1.73059	-1.1963	-0.915047	-1.03197
P52888	Thimet oligopeptidase	THOP1		metabolic process	cytoplasm;cytosol	catalytic activity;metal ion binding	19	Renin-angiotensin system; African trypanosomiasis	Antigen processing: Ubiquitination & Proteasome degradation			118993	99698.8	73192.7											16.8605	16.6053	16.1594											-2.28585	-2.67825	-3.12697
Q9BX79	Receptor for retinol uptake STRA6	STRA6		metabolic process;regulation of biological process;response to stimulus;transport	membrane	receptor activity;transporter activity	15		Signaling by GPCR; Retinoid cycle disease events; The canonical retinoid cycle in rods (twilight vision)			71301.2	207471	123778	24696.4	12440.4	28674.2	58855.7	21737.1	55983.4	23923.2	56101.1	12951.2		16.1216	17.6625	16.9174	14.592	13.6027	14.8075	15.8449	14.4079	15.7727	14.5461	15.7757	13.6608		-3.02472	-1.62099	-2.36899	-3.62828	-5.15393	-3.99323	-3.19931	-3.61235	-2.88383	-4.43008	-2.97089	-4.34688
Q9Y446	Plakophilin-3	PKP3		cell death;cell organization and biogenesis;regulation of biological process	cytoskeleton;membrane;nucleus	protein binding;RNA binding;translation regulator activity	11		Formation of the cornified envelope			93034.4	199112	123419	41937.1	57495.5	34864.1	64671.3		104331	118107	101174	47772.7		16.5055	17.6032	16.9132	15.3559	15.8112	15.0895	15.9808		16.6708	16.8497	16.6265	15.5439		-2.64089	-1.68032	-2.37319	-2.86436	-2.94551	-3.71124	-3.06337		-1.98572	-2.12647	-2.12015	-2.46378
O95297	Myelin protein zero-like protein 1	MPZL1		cell communication;regulation of biological process;response to stimulus	cell surface;membrane	protein binding;structural molecule activity	1	Cell adhesion molecules (CAMs)				331232	196898	406315	122571	70450.9	144431	170708	23851.5	69624.7	67350.9	209723	84143.5		18.3375	17.5871	18.6322	16.9033	16.1043	17.14	17.3812	14.5418	16.0873	16.0394	17.6781	16.3606		-0.80888	-1.69645	-0.654149	-1.31704	-2.65235	-1.66068	-1.66303	-3.47843	-2.56923	-2.9368	-1.0685	-1.64712
Q9Y5Y0	Feline leukemia virus subgroup C receptor-related protein 1	FLVCR1		cell differentiation;cellular homeostasis;development;regulation of biological process;transport	membrane;mitochondrion	protein binding;transporter activity	1		Iron uptake and transport			85719.1	230800	221354	76629.4	40231.6	43942.7	53250.9	62761.2	91801		118437			16.3873	17.8163	17.756	16.2256	15.296	15.4233	15.7005	15.9376	16.4862		16.8538			-2.75903	-1.46726	-1.53039	-1.99469	-3.46063	-3.37736	-3.34369	-2.08264	-2.17032		-1.89287
P16144	Integrin beta-4	ITGB4		cell communication;cell differentiation;cell organization and biogenesis;cellular component movement;metabolic process;regulation of biological process;response to stimulus	cell surface;membrane;nucleus	protein binding;receptor activity	17	Arrhythmogenic right ventricular cardiomyopathy (ARVC); Dilated cardiomyopathy; Focal adhesion; Regulation of actin cytoskeleton; ECM-receptor interaction; PI3K-Akt signaling pathway; Hypertrophic cardiomyopathy (HCM)	Laminin interactions; Assembly of collagen fibrils and other multimeric structures; Type I hemidesmosome assembly; Syndecan interactions	Integrin-mediated Cell Adhesion; Arrhythmogenic Right Ventricular Cardiomyopathy; Alpha 6 Beta 4 signaling pathway; Primary Focal Segmental Glomerulosclerosis FSGS; Focal Adhesion; TGF-beta Signaling Pathway; Regulation of Apoptosis by Parathyroid Hormone-related Protein; Focal Adhesion-PI3K-Akt-mTOR-signaling pathway		82274.6	122876	91344.4						40572					16.3282	16.9068	16.479						15.3082					-2.8182	-2.3767	-2.80736						-3.34834
P08581	Hepatocyte growth factor receptor	MET		cell organization and biogenesis;cell proliferation;metabolic process;regulation of biological process;response to stimulus	cell surface;extracellular;membrane	catalytic activity;nucleotide binding;protein binding;receptor activity;signal transducer activity	7	Endocytosis; Central carbon metabolism in cancer; MicroRNAs in cancer; Cytokine-cytokine receptor interaction; Rap1 signaling pathway; Pathways in cancer; Renal cell carcinoma; Melanoma; EGFR tyrosine kinase inhibitor resistance; Focal adhesion; Malaria; Proteoglycans in cancer; Transcriptional misregulation in cancer; Adherens junction; Bacterial invasion of epithelial cells; Ras signaling pathw…	MET Receptor Activation; MET activates PTK2 signaling; PI5P, PP2A and IER3 Regulate PI3K/AKT Signaling; MET activates RAP1 and RAC1; MET activates RAS signaling; MET receptor recycling; MET activates PTPN11; Negative regulation of MET activity; MET interacts with TNS proteins; Sema4D mediated inhibition of cell attachment and migration; MET activates STAT3; Constitutive Signaling by Aberrant PI3K…	Signaling Pathways in Glioblastoma; Extracellular vesicle-mediated signaling in recipient cells; Focal Adhesion; Signaling of Hepatocyte Growth Factor Receptor; TGF-beta Signaling Pathway; Focal Adhesion-PI3K-Akt-mTOR-signaling pathway		218856	174497		62713.6			106509		85826.1		182043			17.7396	17.4128		15.9365			16.7006		16.3891		17.4739			-1.40674	-1.8707		-2.28381			-2.34359		-2.26741		-1.27271
P26006	Integrin alpha-3	ITGA3		cell differentiation;cell organization and biogenesis;cellular component movement;regulation of biological process;response to stimulus	cell surface;membrane	metal ion binding;protein binding	17	Arrhythmogenic right ventricular cardiomyopathy (ARVC); Dilated cardiomyopathy; Hematopoietic cell lineage; Pathways in cancer; Focal adhesion; Regulation of actin cytoskeleton; Small cell lung cancer; ECM-receptor interaction; PI3K-Akt signaling pathway; Hypertrophic cardiomyopathy (HCM)	Integrin cell surface interactions; Laminin interactions; Basigin interactions; MET activates PTK2 signaling	Integrin-mediated Cell Adhesion; Arrhythmogenic Right Ventricular Cardiomyopathy; Primary Focal Segmental Glomerulosclerosis FSGS; Focal Adhesion; Focal Adhesion-PI3K-Akt-mTOR-signaling pathway		634340	752980	994049	375885	340326	349519	444621	212956	424765	426455	611615	281141		19.2749	19.5223	19.923	18.5199	18.3766	18.415	18.7622	17.7002	18.6963	18.702	19.2223	18.1009		0.128535	0.238712	0.636571	0.299631	-0.380119	-0.385686	-0.28199	-0.320024	0.039765	-0.274171	0.475633	0.0932507
Q99569	Plakophilin-4	PKP4		cell communication;cell death;cell organization and biogenesis;regulation of biological process	cytoplasm;cytoskeleton;membrane	protein binding	2		Formation of the cornified envelope			299850	319057	272124	97186	133226	117617	139015	61695.7	176311	188768	179560	95490.5		18.1939	18.2835	18.0539	16.5685	17.0235	16.8437	17.0849	15.9129	17.4278	17.5263	17.4541	16.5431		-0.95248	-1.00009	-1.23248	-1.65184	-1.73316	-1.95696	-1.95933	-2.10734	-1.22878	-1.44995	-1.29252	-1.46461
Q8TAA9	Vang-like protein 1	VANGL1		development;regulation of biological process;response to stimulus	membrane	protein binding	1	Wnt signaling pathway				395614	153503	266488				175395				151497			18.5937	17.2279	18.0237				17.4202				17.2089			-0.55263	-2.05563	-1.26267				-1.62396				-1.5377
Q92804	TATA-binding protein-associated factor 2N	TAF15		regulation of biological process	cytoplasm;nucleus	DNA binding;metal ion binding;protein binding;RNA binding	17; CHR_HSCHR17_7_CTG4	Basal transcription factors; Transcriptional misregulation in cancer				1.03767e+07	1.04447e+07	1.26761e+07	6.18083e+06	6171958	5.48982e+06	7.52884e+06	3.37828e+06	2.98283e+07	2.62214e+07	2.46258e+07	1.63549e+07		23.3068	23.3163	23.5956	22.5594	22.5573	22.3883	22.844	21.6879	24.8302	24.6442	24.5537	23.9632		4.16048	4.03273	4.30922	4.33907	3.80062	3.58763	3.79979	3.66764	6.17364	5.66803	5.80704	5.95554
Q9Y2J2	Band 4.1-like protein 3	EPB41L3		cell death;cell organization and biogenesis;regulation of biological process	cytoplasm;cytoskeleton;cytosol;membrane	protein binding;structural molecule activity	18	Tight junction	Neurexins and neuroligins			89017	205091	48734.1	19422.1		52449								16.4418	17.6459	15.5726	14.2454		15.6786								-2.70457	-1.63763	-3.71374	-3.97489		-3.12207
O94856	Neurofascin	NFASC		cell organization and biogenesis;cellular component movement;transport	membrane	protein binding	1	Cell adhesion molecules (CAMs)	Neutrophil degranulation; Neurofascin interactions; Interaction between L1 and Ankyrins			171018	117596	32657.4	201488		31645.5	114422		39081.6					17.3838	16.8435	14.9951	17.6203		14.9497	16.804		15.2542					-1.76257	-2.44006	-4.29126	-0.599969		-3.85098	-2.2402		-3.40234
P53985	Monocarboxylate transporter 1	SLC16A1		cell organization and biogenesis;cellular component movement;metabolic process;regulation of biological process;response to stimulus;transport	membrane;mitochondrion	protein binding;transporter activity	1; CHR_HG2104_PATCH		Proton-coupled monocarboxylate transport; Defective SLC16A1 causes symptomatic deficiency in lactate transport (SDLT); Basigin interactions; Pyruvate metabolism	Photodynamic therapy-induced HIF-1 survival signaling		991057	1.17265e+06	1.17258e+06	386112	370071	375845	775227	123793	501200	738474	776481	263060		19.9186	20.1613	20.1613	18.5587	18.4974	18.5198	19.5643	16.9176	18.935	19.4942	19.5666	18.005		0.772246	0.877799	0.874866	0.33836	-0.259233	-0.280918	0.520054	-1.10265	0.278487	0.517982	0.81996	-0.00265091
Q9Y4P3	Transducin beta-like protein 2	TBL2		cell communication;regulation of biological process;response to stimulus	endoplasmic reticulum	protein binding;RNA binding	7					444811	431519	546195	34363.7	31346.9	165474	231835	11102.4	121516	247197	170500	59560.1		18.7628	18.7191	19.0591	15.0686	14.936	17.3362	17.8227	13.4386	16.8908	17.9153	17.3794	15.8621		-0.383529	-0.564474	-0.22733	-3.1517	-3.82064	-1.46445	-1.22147	-4.58164	-1.76575	-1.0609	-1.36722	-2.14562
P21589	5'-nucleotidase	NT5E		metabolic process;regulation of biological process	cell surface;cytosol;membrane	catalytic activity;metal ion binding;nucleotide binding	6	Purine metabolism; Nicotinate and nicotinamide metabolism; Metabolic pathways; Pyrimidine metabolism	Pyrimidine catabolism; Purine catabolism; Nicotinate metabolism	Differentiation Pathway; NAD+ metabolism		233114	282948	173076	693996			145481	322871		72861.9	49568.8	20323.4		17.8307	18.1102	17.401	19.4046			17.1505	18.3006		16.1529	15.5971	14.3109		-1.31569	-1.17336	-1.88534	1.18427			-1.89373	0.280376		-2.82333	-3.14949	-3.69683
Q9BQB6	Vitamin K epoxide reductase complex subunit 1	VKORC1		coagulation;metabolic process	endoplasmic reticulum;membrane	catalytic activity	16	Ubiquinone and other terpenoid-quinone biosynthesis	Metabolism of vitamin K			329791	384044	568164	105860	155327	203882	134027		72570	142522				18.3312	18.5509	19.1159	16.6918	17.2449	17.6374	17.0322		16.1471	17.1208				-0.815172	-0.732627	-0.170437	-1.5285	-1.51173	-1.16332	-2.01204		-2.50945	-1.85538
O43570	Carbonic anhydrase 12	CA12		metabolic process;transport	membrane	catalytic activity;metal ion binding	15	Nitrogen metabolism	Reversible hydration of carbon dioxide			798454	812632	1.15149e+06	259092	288783	318086	572881	142031	207194	348918	559857	135433		19.6068	19.6322	20.1351	17.9831	18.1396	18.2791	19.1279	17.1158	17.6606	18.4125	19.0947	17.0472		0.460487	0.348703	0.848684	-0.237193	-0.617048	-0.521637	0.0836713	-0.90438	-0.99592	-0.563678	0.348068	-0.960465
P09382	Galectin-1	LGALS1		cell death;cell differentiation;cellular homeostasis;metabolic process;regulation of biological process;response to stimulus	cell surface;cytoplasm;cytosol;extracellular;nucleus;organelle lumen	protein binding;RNA binding;signal transducer activity	22		Post-translational protein phosphorylation; Regulation of Insulin-like Growth Factor (IGF) transport and uptake by Insulin-like Growth Factor Binding Proteins (IGFBPs)			4.09052e+06	2.65183e+06	4.35999e+06	1.95903e+06	1.53076e+06	1.80498e+06	2.17719e+06	836915	1.5551e+06	1.43422e+06	1.85184e+06	830327		21.9639	21.3386	22.0559	20.9017	20.5458	20.7836	21.054	19.6747	20.5686	20.4518	20.8205	19.6633		2.81749	2.05502	2.76951	2.68141	1.78914	1.98286	2.00983	1.6545	1.91204	1.47563	2.07389	1.65564
Q9UJS0	Calcium-binding mitochondrial carrier protein Aralar2	SLC25A13		metabolic process;response to stimulus;transport	membrane;mitochondrion	metal ion binding;transporter activity	7		Gluconeogenesis; Mitochondrial protein import; Metabolism of proteins			3.48248e+06	5.30251e+06	4.52564e+06	1.80234e+06	1.69231e+06	1.99842e+06	2.23885e+06	1.47335e+06	1.65963e+06	3.78895e+06	2.54603e+06	2.21557e+06		21.7317	22.3382	22.1097	20.7814	20.6906	20.9304	21.0943	20.4907	20.6624	21.8534	21.2798	21.0792		2.58532	3.0547	2.8233	2.56114	1.93389	2.12974	2.05012	2.47045	2.00589	2.87716	2.53319	3.07156
Q68CQ4	Digestive organ expansion factor homolog	DIEXF		development;metabolic process	nucleus	protein binding;RNA binding	1		Major pathway of rRNA processing in the nucleolus and cytosol; rRNA modification in the nucleus and cytosol			384279	360137	402455	207727	199156	182388	187201	133992	203458	203204	195231	222734		18.5518	18.4582	18.6185	17.6643	17.6035	17.4766	17.5142	17.0318	17.6344	17.6326	17.5748	17.765		-0.594568	-0.825353	-0.667918	-0.55597	-1.15314	-1.32405	-1.52997	-0.988435	-1.02217	-1.34363	-1.17181	-0.24272
Q5UCC4	ER membrane protein complex subunit 10	EMC10			extracellular;membrane		19					154255	175475	208914		34919.6	49171.8			12311.3	89800.5	81504.7	11228		17.235	17.4209	17.6726		15.0917	15.5855			13.5877	16.4544	16.3146	13.4548		-1.91141	-1.86263	-1.61384		-3.66493	-3.21515			-5.06884	-2.52177	-2.43203	-4.55286
O15439	Multidrug resistance-associated protein 4	ABCC4		cell organization and biogenesis;metabolic process;regulation of biological process;response to stimulus;transport	membrane	catalytic activity;nucleotide binding;transporter activity	13	Bile secretion; Antifolate resistance; ABC transporters; cAMP signaling pathway	Platelet degranulation ; ABC-family proteins mediated transport	Fluoropyrimidine Activity; Drug Induction of Bile Acid Pathway; Ectoderm Differentiation; NRF2 pathway; Photodynamic therapy-induced NFE2L2 (NRF2) survival signaling; TYROBP Causal Network		180451	251385	226713	20792	52286.4	38847.1	102004	11884.4	37017.6	20797.9	179759	11349.6		17.4612	17.9395	17.7905	14.3437	15.6741	15.2455	16.6383	13.5368	15.1759	14.3442	17.4557	13.4704		-1.68512	-1.344	-1.49588	-3.87656	-3.08253	-3.55518	-2.40594	-4.48345	-3.48062	-4.63205	-1.29093	-4.53733
P03897	NADH-ubiquinone oxidoreductase chain 3	ND3		cell organization and biogenesis;metabolic process;response to stimulus;transport	membrane;mitochondrion	catalytic activity;protein binding	MT	Parkinson's disease; Oxidative phosphorylation; Metabolic pathways	Complex I biogenesis	Electron Transport Chain; Oxidative phosphorylation		115164	183862	68620.7	41615.3			100920	26905.4	65913.2	89679.2	62757.2	41628.8		16.8133	17.4883	16.0664	15.3448			16.6229	14.7156	16.0083	16.4525	15.9375	15.3453		-2.33303	-1.79528	-3.22003	-2.87547			-2.42135	-3.30461	-2.64826	-2.52372	-2.80914	-2.66239
P00390	Glutathione reductase, mitochondrial	GSR		cellular homeostasis;metabolic process;regulation of biological process;response to stimulus	cytoplasm;cytosol;mitochondrion;organelle lumen	antioxidant activity;catalytic activity;nucleotide binding	8	Glutathione metabolism; Thyroid hormone synthesis	Detoxification of Reactive Oxygen Species	Glutathione metabolism; Selenium Micronutrient Network; NRF2 pathway; Amino Acid metabolism; One carbon metabolism and related pathways; Oxidative Stress; Sulfation Biotransformation Reaction; Metapathway biotransformation		440150	235575	136804	17081.8	54509.5	47322.8	79483.1		39769.8	58847.7	49316.2	12429		18.7476	17.8458	17.0617	14.0602	15.7342	15.5302	16.2784		15.2794	15.8447	15.5898	13.6014		-0.398727	-1.43771	-2.22464	-4.16012	-3.02245	-3.27045	-2.76584		-3.37715	-3.13151	-3.15686	-4.40626
Q5BJD5	Transmembrane protein 41B	TMEM41B			membrane		11					504066	272784	240198				303151							18.9433	18.0574	17.8739				18.2097							-0.203108	-1.22614	-1.41252				-0.834526
Q8NBJ5	Procollagen galactosyltransferase 1	COLGALT1; GLT25D1			endoplasmic reticulum;membrane;organelle lumen	catalytic activity	19	Lysine degradation; Other types of O-glycan biosynthesis	Collagen biosynthesis and modifying enzymes			294339	226100	198503	87562.6	131580	114272	94454.2	39745.7	90878.8	120690	65930.3	48263.3		18.1671	17.7866	17.5988	16.418	17.0056	16.8021	16.5273	15.2785	16.4717	16.8809	16.0087	15.5586		-0.979242	-1.49694	-1.68759	-1.80227	-1.7511	-1.99858	-2.51688	-2.74171	-2.18488	-2.09526	-2.73798	-2.44904
P54727	UV excision repair protein RAD23 homolog B	RAD23B		cell organization and biogenesis;metabolic process;regulation of biological process;response to stimulus	cytoplasm;cytosol;nucleus;proteasome	DNA binding;protein binding	9	Protein processing in endoplasmic reticulum; Nucleotide excision repair	Josephin domain DUBs; Formation of Incision Complex in GG-NER; DNA Damage Recognition in GG-NER; N-glycan trimming in the ER and Calnexin/Calreticulin cycle			320743	406954	263872	129182	179034	122649	171169	85982	68354.7	94871.6	132600	68935.3		18.2911	18.6345	18.0095	16.979	17.4499	16.9042	17.3851	16.3917	16.0608	16.5337	17.0167	16.073		-0.855306	-0.649035	-1.27691	-1.24125	-1.3068	-1.89652	-1.65915	-1.62848	-2.59579	-2.44252	-1.72991	-1.93473
Q4G0J3	La-related protein 7	LARP7		metabolic process	cytosol;nucleus	protein binding;RNA binding	4					2.11294e+06	2.67857e+06	2.19705e+06	860600	1.25502e+06	1.0152e+06	1.23588e+06	354257	927385	1.22496e+06	1.27698e+06	570539		21.0108	21.353	21.0671	19.715	20.2593	19.9533	20.2371	18.4344	19.8228	20.2243	20.2843	19.122		1.86446	2.06949	1.78075	1.49468	1.50261	1.15264	1.1929	0.414215	1.16627	1.24809	1.53767	1.11428
Q07065	Cytoskeleton-associated protein 4	CKAP4		metabolic process;transport	cytoplasm;cytoskeleton;cytosol;endoplasmic reticulum;membrane;organelle lumen	RNA binding	12	Protein processing in endoplasmic reticulum	Post-translational protein phosphorylation; Regulation of Insulin-like Growth Factor (IGF) transport and uptake by Insulin-like Growth Factor Binding Proteins (IGFBPs); Surfactant metabolism; Neutrophil degranulation			1.6068e+06	2.09777e+06	2.95468e+06	212239	560876	695929	546257	140874	213752	602671	672769	111274		20.6158	21.0004	21.4946	17.6953	19.0973	19.4086	19.0592	17.104	17.7056	19.201	19.3598	16.7638		1.4694	1.71689	2.20818	-0.524971	0.340648	0.607884	0.0150144	-0.916173	-0.950963	0.224806	0.613121	-1.24392
P35580	Myosin-10	MYH10		cell organization and biogenesis;cellular component movement;metabolic process;regulation of biological process;transport	cytoplasm;cytosol;nucleus	catalytic activity;motor activity;nucleotide binding;protein binding;transporter activity	17	Tight junction; Salmonella infection; Regulation of actin cytoskeleton	RHO GTPases activate PAKs; EPHA-mediated growth cone collapse; RHO GTPases Activate ROCKs; Sema4D induced cell migration and growth-cone collapse; RHO GTPases activate CIT; RHO GTPases activate PKNs	Regulation of Actin Cytoskeleton		3.05299e+06	3.5327e+06	3.06903e+06	1.50261e+06	1.95198e+06	1.6135e+06	1.78395e+06	809985	2.17405e+06	2.17558e+06	1.94433e+06	1.3297e+06		21.5418	21.7523	21.5494	20.519	20.8965	20.6218	20.7666	19.6275	21.052	21.053	20.8908	20.3427		2.39543	2.4688	2.26296	2.29874	2.13983	1.82106	1.72244	1.60731	2.39541	2.07676	2.14421	2.33498
Q8WVV4	Protein POF1B	POF1B		cell organization and biogenesis		protein binding	X					134221	425036	189821	61485.5	85164.7	70798.3	138051	14588.3	134240	156399	123993	62618.5		17.0342	18.6972	17.5343	15.908	16.378	16.1114	17.0748	13.8325	17.0345	17.2549	16.9199	15.9343		-2.11211	-0.586313	-1.75211	-2.31234	-2.37871	-2.68927	-1.96936	-4.1877	-1.62209	-1.72133	-1.82673	-2.07338
Q9Y2H5	Pleckstrin homology domain-containing family A member 6	PLEKHA6					1		Synthesis of PIPs at the plasma membrane			193564	316921	299980	71452.7	98383.3	110438	148996	34488.4	162207	208825	203921	89389		17.5624	18.2738	18.1945	16.1247	16.5861	16.7529	17.1849	15.0738	17.3075	17.6719	17.6376	16.4478		-1.58391	-1.00978	-1.09188	-2.0956	-2.17055	-2.04782	-1.85929	-2.9464	-1.34906	-1.30427	-1.10898	-1.55987
Q02878	60S ribosomal protein L6	RPL6		cell organization and biogenesis;metabolic process;regulation of biological process;transport	cytosol;membrane;nucleus;ribosome	DNA binding;protein binding;RNA binding;structural molecule activity	12	Ribosome	Peptide chain elongation; Eukaryotic Translation Termination; Viral mRNA Translation; L13a-mediated translational silencing of Ceruloplasmin expression; Nonsense Mediated Decay (NMD) independent of the Exon Junction Complex (EJC); Selenocysteine synthesis; Nonsense Mediated Decay (NMD) enhanced by the Exon Junction Complex (EJC); GTP hydrolysis and joining of the 60S ribosomal subunit; Major path…	Cytoplasmic Ribosomal Proteins		1.34912e+07	1.4206e+07	1.17291e+07	3.39899e+06	4.79016e+06	4.52488e+06	5.77644e+06	2.92987e+06	5.20154e+06	5.95055e+06	4.66149e+06	2.95931e+06		23.6855	23.76	23.4836	21.6967	22.1916	22.1094	22.4617	21.4824	22.3105	22.5046	22.1524	21.4968		4.53915	4.47645	4.19721	3.47637	3.43497	3.30875	3.41754	3.46218	3.65397	3.52839	3.40573	3.48915
P05556	Integrin beta-1	ITGB1		cell differentiation;cell growth;cell organization and biogenesis;cellular component movement;defense response;metabolic process;regulation of biological process;response to stimulus;transport	cell surface;cytoplasm;endosome;membrane	enzyme regulator activity;metal ion binding;protein binding;receptor activity;signal transducer activity	10	Arrhythmogenic right ventricular cardiomyopathy (ARVC); Pathogenic Escherichia coli infection; Dilated cardiomyopathy; Leishmaniasis; Rap1 signaling pathway; Cell adhesion molecules (CAMs); Pathways in cancer; Pertussis; Toxoplasmosis; Phagosome; Focal adhesion; Proteoglycans in cancer; Regulation of actin cytoskeleton; Leukocyte transendothelial migration; Bacterial invasion of epithelial cells;…	Integrin cell surface interactions; Signal transduction by L1; Basigin interactions; MET activates PTK2 signaling; Molecules associated with elastic fibres; Platelet Adhesion to exposed collagen; Syndecan interactions; CHL1 interactions; ECM proteoglycans; Laminin interactions; Localization of the PINCH-ILK-PARVIN complex to focal adhesions; Immunoregulatory interactions between a Lymphoid and a …	Integrin-mediated Cell Adhesion; Prolactin Signaling Pathway; Neural Crest Differentiation; Arrhythmogenic Right Ventricular Cardiomyopathy; Pathogenic Escherichia coli infection; Primary Focal Segmental Glomerulosclerosis FSGS; Focal Adhesion; Signaling of Hepatocyte Growth Factor Receptor; Rac1/Pak1/p38/MMP-2 pathway; TGF-beta Signaling Pathway; Factors and pathways affecting insulin-like growt…		1.83703e+06	1791864	2.75311e+06	639235	825387	826863	1.2523e+06	385222	738128	833981	1.16311e+06	448954		20.8089	20.773	21.3926	19.286	19.6547	19.6573	20.2562	18.5553	19.4935	19.6697	20.1496	18.7762		1.66258	1.48949	2.10625	1.06569	0.898035	0.856593	1.21195	0.535107	0.836972	0.69345	1.40293	0.768527
Q9NUL7	Probable ATP-dependent RNA helicase DDX28	DDX28		cell organization and biogenesis;metabolic process	cytosol;mitochondrion;nucleus;organelle lumen	catalytic activity;nucleotide binding;RNA binding	16					273003	277151	333341	202595	151118	155084	162985	113478	157856	186796	148502	98208.6		18.0586	18.0803	18.3466	17.6282	17.2053	17.2427	17.3144	16.7921	17.2683	17.5111	17.1801	16.5836		-1.08781	-1.20323	-0.939747	-0.592064	-1.55136	-1.55801	-1.72982	-1.22817	-1.38829	-1.4651	-1.56651	-1.42412
Q9Y6M7	Sodium bicarbonate cotransporter 3	SLC4A7		cellular homeostasis;transport	membrane	transporter activity	3		Bicarbonate transporters			269098	397249	263258	64925.4	115411	75661.9	173945	40704.8	156689	205656	252272	80813.2		18.0378	18.5997	18.0061	15.9865	16.8164	16.2073	17.4083	15.3129	17.2575	17.6499	17.9446	16.3023		-1.10859	-0.683854	-1.28027	-2.2338	-1.94025	-2.59342	-1.63593	-2.70731	-1.399	-1.32633	-0.802009	-1.70538
P01892	HLA class I histocompatibility antigen, A-2 alpha chain	HLA-A; LOC100507703		cell organization and biogenesis;defense response;metabolic process;regulation of biological process;response to stimulus	cell surface;endoplasmic reticulum;Golgi;membrane	protein binding;RNA binding	6; CHR_HSCHR6_MHC_DBB_CTG1		Interferon alpha/beta signaling; E3 ubiquitin ligases ubiquitinate target proteins; Endosomal/Vacuolar pathway; Immunoregulatory interactions between a Lymphoid and a non-Lymphoid cell; Interferon gamma signaling; Antigen Presentation: Folding, assembly and peptide loading of class I MHC; ER-Phagosome pathway; Nef mediated downregulation of MHC class I complex cell surface expression	Proteasome Degradation; Allograft Rejection		524308	537478	693714	143670	227757	239408	299036	30142.7	252021	386609	440715	183610		19.0001	19.0358	19.404	17.1324	17.7971	17.8691	18.19	14.8795	17.9432	18.5605	18.7495	17.4863		-0.146309	-0.247694	0.117596	-1.0879	-0.959538	-0.931586	-0.854245	-3.1407	-0.713357	-0.415689	0.00285599	-0.521395
P46459	Vesicle-fusing ATPase	NSF		cell organization and biogenesis;metabolic process;regulation of biological process;response to stimulus;transport	cytoplasm;cytosol;membrane	catalytic activity;metal ion binding;nucleotide binding;protein binding;RNA binding	17; CHR_HSCHR17_1_CTG5; CHR_HSCHR17_2_CTG5	Vasopressin-regulated water reabsorption; GABAergic synapse; Synaptic vesicle cycle	COPI-dependent Golgi-to-ER retrograde traffic; Intra-Golgi traffic; COPII (Coat Protein 2) Mediated Vesicle Transport; COPI-mediated anterograde transport; Retrograde transport at the Trans-Golgi-Network; Trafficking of GluR2-containing AMPA receptors	Synaptic Vesicle Pathway; Brain-Derived Neurotrophic Factor (BDNF) signaling pathway		108967	82297.6	116199	11669.3	20827.3	28969.9	46515		15623.2	46568	171529			16.7335	16.3286	16.8262	13.5104	14.3462	14.8223	15.5054		13.9314	15.5071	17.3881			-2.41283	-2.95498	-2.46015	-4.70987	-4.41049	-3.97843	-3.5388		-4.72514	-3.46916	-1.35854
P63244	Receptor of activated protein C kinase 1	GNB2L1; RACK1		cell death;cellular homeostasis;development;metabolic process;regulation of biological process;response to stimulus	cytoplasm;cytosol;membrane;mitochondrion;nucleus;ribosome	enzyme regulator activity;protein binding;RNA binding;structural molecule activity	5	Measles	Regulation of TNFR1 signaling; TNFR1-mediated ceramide production; TNFR1-induced NFkappaB signaling pathway	Androgen receptor signaling pathway; Brain-Derived Neurotrophic Factor (BDNF) signaling pathway; VEGFA-VEGFR2 Signaling Pathway; Interferon type I signaling pathways		2.24966e+06	2.26542e+06	2.22421e+06	652763	922858	976973	1.01551e+06	515339	579052	444983	508043	229385		21.1013	21.1113	21.0849	19.3162	19.8157	19.898	19.9538	18.9752	19.1433	18.7634	18.9546	17.8074		1.95491	1.82781	1.79848	1.0959	1.05907	1.09726	0.909563	0.95494	0.486794	-0.212815	0.20796	-0.20027
Q8TEM1	Nuclear pore membrane glycoprotein 210	NUP210		cell organization and biogenesis;metabolic process;regulation of biological process;transport	endoplasmic reticulum;membrane;nucleus	protein binding	3	RNA transport	Rev-mediated nuclear export of HIV RNA; ISG15 antiviral mechanism; NEP/NS2 Interacts with the Cellular Export Machinery; tRNA processing in the nucleus; Transcriptional regulation by small RNAs; Nuclear Pore Complex (NPC) Disassembly; Regulation of Glucokinase by Glucokinase Regulatory Protein; Vpr-mediated nuclear import of PICs; Regulation of HSF1-mediated heat shock response; snRNP Assembly; S…			1.26271e+06	2.49672e+06	1.60303e+06	1.40788e+06	790180	931211	1.27551e+06	384492	863443	1.19074e+06	993200	323231		20.2681	21.2516	20.6124	20.4251	19.5918	19.8287	20.2826	18.5526	19.7197	20.1834	19.9217	18.3022		1.12173	1.96807	1.32598	2.20479	0.835146	1.02805	1.23844	0.532372	1.0632	1.20722	1.17509	0.294521
P82909	28S ribosomal protein S36, mitochondrial	MRPS36		cell organization and biogenesis;metabolic process	membrane;mitochondrion;ribosome	structural molecule activity	5; CHR_HSCHR5_2_CTG1_1		Mitochondrial translation initiation; Mitochondrial translation elongation; Mitochondrial translation termination			145864	154055	83545.6	79460	46736.1	63828.7	54369.1	48126.1	67977	92182.4	65131.2	42100.5		17.1543	17.2331	16.3503	16.2779	15.5122	15.9619	15.7305	15.5545	16.0528	16.4922	15.9911	15.3616		-1.9921	-2.05045	-2.93611	-1.94236	-3.24443	-2.83878	-3.31371	-2.46569	-2.60378	-2.484	-2.75557	-2.64613
Q9UHQ9	NADH-cytochrome b5 reductase 1	CYB5R1		metabolic process;transport	membrane;mitochondrion	catalytic activity;protein binding	1	Amino sugar and nucleotide sugar metabolism	Platelet degranulation ; Erythrocytes take up carbon dioxide and release oxygen	Oxidation by Cytochrome P450		266742	371484	373836	209491	183122	198108	236003	88654.1	122453	205139	188468	73360.4		18.0251	18.5029	18.512	17.6765	17.4824	17.5959	17.8484	16.4359	16.9019	17.6462	17.524	16.1627		-1.12128	-0.7806	-0.774339	-0.543772	-1.27423	-1.20477	-1.19576	-1.58432	-1.75467	-1.32997	-1.22267	-1.84497
O14828	Secretory carrier-associated membrane protein 3	SCAMP3		transport	membrane	protein binding	1; CHR_HSCHR1_2_CTG31					394508	157509	315240	5843.99	47240.8	30048.1	44190.8		33739.2	13576.9	127864			18.5897	17.2651	18.2661	12.5127	15.5277	14.875	15.4315		15.0421	13.7289	16.9643			-0.556668	-2.01847	-1.0203	-5.70756	-3.22893	-3.92571	-3.61275		-3.6144	-5.24733	-1.78238
Q9Y5M8	Signal recognition particle receptor subunit beta	SRPRB		regulation of biological process;response to stimulus	cytoplasm;endoplasmic reticulum;membrane	nucleotide binding	3	Protein export	XBP1(S) activates chaperone genes; SRP-dependent cotranslational protein targeting to membrane			78392.8	88586.1	135572	24085.6	35052.5		62069.8	20455.9		33640.5	35338.6			16.2584	16.4348	17.0487	14.5559	15.0972		15.9216	14.3202		15.0379	15.109			-2.88793	-2.84875	-2.23768	-3.66442	-3.65945		-3.1226	-3.69999		-3.93829	-3.63767
P33527	Multidrug resistance-associated protein 1	ABCC1		cell organization and biogenesis;cellular component movement;metabolic process;response to stimulus;transport	membrane	catalytic activity;nucleotide binding;transporter activity	16; CHR_HSCHR16_1_CTG1	MicroRNAs in cancer; Antifolate resistance; Sphingolipid signaling pathway; Vitamin digestion and absorption; ABC transporters	Cobalamin (Cbl, vitamin B12) transport and metabolism; Synthesis of Leukotrienes (LT) and Eoxins (EX); ABC-family proteins mediated transport	Irinotecan Pathway		593182	542667	723105	99225.6	174626	182381	285877	79439.4	201027	201680	376662	82909.9		19.1781	19.0497	19.4638	16.5984	17.4139	17.4766	18.125	16.2776	17.617	17.6217	18.5229	16.3393		0.0317517	-0.233833	0.177459	-1.62188	-1.34277	-1.3241	-0.919172	-1.74265	-1.03951	-1.3545	-0.223718	-1.66843
Q15526	Surfeit locus protein 1	SURF1		cell organization and biogenesis;metabolic process;transport	membrane;mitochondrion	catalytic activity;protein binding;transporter activity	9; CHR_HG2030_PATCH		TP53 Regulates Metabolic Genes; Respiratory electron transport	Electron Transport Chain; Type II diabetes mellitus		244822	268733	172222	40319.8	55747.4	86466.3	155309		41597.9	28924.8				17.9014	18.0358	17.3939	15.2992	15.7666	16.3998	17.2448		15.3442	14.82				-1.24499	-1.24773	-1.89248	-2.9211	-2.99006	-2.40085	-1.79943		-3.31232	-4.15618
Q9P2M7	Cingulin	CGN		regulation of biological process;response to stimulus	membrane	catalytic activity;motor activity;protein binding	1	Tight junction	TGF-beta receptor signaling in EMT (epithelial to mesenchymal transition)			156221	284857	199536	39006.5	27255.6	46193.9	90591.2	71358.8	198159	221737	193033	110424		17.2532	18.1199	17.6063	15.2514	14.7343	15.4954	16.4671	16.1228	17.5963	17.7585	17.5585	16.7527		-1.89314	-1.16366	-1.6801	-2.96887	-4.02241	-3.30528	-2.57712	-1.89742	-1.06024	-1.21772	-1.18815	-1.25498
Q9UII2	ATPase inhibitor, mitochondrial	ATPIF1		cell differentiation;cell organization and biogenesis;metabolic process;regulation of biological process	cell surface;mitochondrion	catalytic activity;enzyme regulator activity;protein binding	1			Electron Transport Chain		1.34431e+06	1.78537e+06	1.9574e+06	310183	524257	662131	819807	175110	517535	661671	736600	216609		20.3584	20.7678	20.9005	18.2428	18.9999	19.3368	19.6449	17.4179	18.9813	19.3358	19.4905	17.7247		1.21208	1.48425	1.61412	0.0224592	0.243239	0.536061	0.600721	-0.602324	0.324759	0.359548	0.74389	-0.282948
O95299	NADH dehydrogenase [ubiquinone] 1 alpha subcomplex subunit 10, mitochondrial	NDUFA10		cell organization and biogenesis;metabolic process;transport	membrane;mitochondrion;organelle lumen	catalytic activity	2; CHR_HG2233_PATCH	Huntington's disease; Parkinson's disease; Alzheimer's disease; Oxidative phosphorylation; Non-alcoholic fatty liver disease (NAFLD); Metabolic pathways	Complex I biogenesis	Electron Transport Chain; Oxidative phosphorylation		1.87294e+06	2.49128e+06	2.27466e+06	1.41948e+06	981598	1.12606e+06	1.09387e+06	945191	1.27106e+06	1.10623e+06	1.2904e+06	929184		20.8369	21.2485	21.1172	20.4369	19.9048	20.1029	20.061	19.8502	20.2776	20.0772	20.2994	19.8256		1.69051	1.96491	1.83083	2.21663	1.1481	1.30216	1.0168	1.83002	1.62107	1.10101	1.55275	1.81792
Q02241	Kinesin-like protein KIF23	KIF23		cell division;cell organization and biogenesis;cellular component movement;regulation of biological process;transport	cytoplasm;cytoskeleton;cytosol;nucleus	catalytic activity;motor activity;nucleotide binding;protein binding	15	MicroRNAs in cancer	COPI-dependent Golgi-to-ER retrograde traffic; Kinesins; MHC class II antigen presentation; Mitotic Telophase/Cytokinesis			355055	278873	246521	117685	169025	153883	130525	45607.9	144818	116407	87529.2	59995.9		18.4377	18.0893	17.9114	16.8446	17.3669	17.2315	16.994	15.477	17.1439	16.8288	16.4175	15.8726		-0.708679	-1.19429	-1.37503	-1.37573	-1.3898	-1.56923	-2.05024	-2.54322	-1.51266	-2.14738	-2.32915	-2.13511
Q15758	Neutral amino acid transporter B(0)	SLC1A5		transport	membrane	protein binding;receptor activity;transporter activity	19	Central carbon metabolism in cancer; Protein digestion and absorption	Amino acid transport across the plasma membrane	TYROBP Causal Network		458788	236361	411386	96811.8	136423	134030	177981	59903.4	115427	174369	215513	79392.2		18.8075	17.8506	18.6501	16.5629	17.0577	17.0322	17.4414	15.8703	16.8166	17.4118	17.7174	16.2767		-0.338895	-1.43291	-0.636254	-1.65741	-1.69895	-1.7685	-1.60284	-2.14987	-1.83992	-1.56442	-1.02922	-1.73097
Q8WUD4	Coiled-coil domain-containing protein 12	CCDC12		metabolic process	cytoplasm	catalytic activity;nucleotide binding;protein binding	3	Spliceosome				203687	377496	203874	93857.9	130702	129569	123599	34196.5	265646	295088	114548	94618.5		17.636	18.5261	17.6373	16.5182	16.9959	16.9834	16.9153	15.0616	18.0191	18.1708	16.8056	16.5298		-1.51037	-0.757436	-1.64907	-1.70211	-1.76075	-1.81733	-2.1289	-2.95866	-0.637395	-0.805418	-1.94104	-1.47785
Q9H2W6	39S ribosomal protein L46, mitochondrial	MRPL46		cell organization and biogenesis;metabolic process	membrane;mitochondrion;ribosome	catalytic activity;structural molecule activity	15		Mitochondrial translation initiation; Mitochondrial translation elongation; Mitochondrial translation termination			120353	86600.6	211518	106454	50325.9	44688.5	82913.4	53715.9	34603.1	53002.1	98122.6	39925.7		16.8769	16.4021	17.6904	16.6999	15.619	15.4476	16.3393	15.7131	15.0786	15.6938	16.5823	15.285		-2.26945	-2.88145	-1.59596	-1.52043	-3.13766	-3.35308	-2.70489	-2.30716	-3.57793	-3.28244	-2.16433	-2.72265
O95235	Kinesin-like protein KIF20A	KIF20A		cell organization and biogenesis;cellular component movement;transport	cytoplasm;cytoskeleton;Golgi	catalytic activity;motor activity;nucleotide binding;protein binding;transporter activity	5		COPI-dependent Golgi-to-ER retrograde traffic; Kinesins; MHC class II antigen presentation; Mitotic Telophase/Cytokinesis			124524	101635	119814	86418.1	66485.2	65730.7	59276.8	40294.4	75394.6	80206.8	70301.2	63486.8		16.9261	16.633	16.8704	16.399	16.0207	16.0043	15.8552	15.2983	16.2022	16.2914	16.1013	15.9542		-2.22029	-2.6505	-2.41595	-1.82125	-2.73593	-2.79642	-3.18902	-2.72193	-2.45437	-2.68477	-2.64537	-2.05351
Q8IX01	SURP and G-patch domain-containing protein 2	SUGP2		metabolic process	nucleus	RNA binding	19			mRNA Processing		714813	873508	897958	359489	440555	432854	598296	268000	882728	980154	932832	541581		19.4472	19.7365	19.7763	18.4556	18.749	18.7235	19.1905	18.0319	19.7516	19.9026	19.8313	19.0468		0.300844	0.452921	0.489902	0.235287	-0.00771231	-0.077176	0.146295	0.0116516	1.09507	0.926444	1.08463	1.03914
Q9BYC8	39S ribosomal protein L32, mitochondrial	MRPL32		cell organization and biogenesis;metabolic process	membrane;mitochondrion;ribosome	RNA binding;structural molecule activity	7	Ribosome	Mitochondrial translation initiation; Mitochondrial translation elongation; Mitochondrial translation termination			313132	312928	332680	101170	140815	164806	176093	36070.7	59442.3	203457	66544.2			18.2564	18.2555	18.3438	16.6264	17.1034	17.3304	17.426	15.1385	15.8592	17.6344	16.022			-0.88995	-1.02807	-0.94261	-1.59388	-1.65324	-1.47029	-1.61823	-2.88168	-2.79734	-1.34184	-2.72461
Q9BZJ0	Crooked neck-like protein 1	CRNKL1		cell organization and biogenesis;metabolic process	cytoplasm;nucleus;spliceosomal complex	catalytic activity;protein binding;RNA binding	20	Spliceosome	mRNA Splicing - Major Pathway			422266	887279	405064	180808	189051	193011	263042	150373	171545	331972	285809	169722		18.6878	19.759	18.6278	17.4641	17.5284	17.5583	18.0049	17.1982	17.3882	18.3407	18.1247	17.3728		-0.458569	0.475489	-0.658595	-0.756203	-1.22826	-1.24237	-1.03927	-0.822036	-1.26831	-0.635503	-0.62194	-0.634869
Q8TBK6	Zinc finger CCHC domain-containing protein 10	ZCCHC10				metal ion binding;protein binding	5					227682	328428	117248	90879.5	136030			125101	294651	316717	213057	130648		17.7967	18.3252	16.8392	16.4717	17.0536			16.9327	18.1686	18.2728	17.7009	16.9953		-1.3497	-0.958323	-2.44718	-1.74863	-1.70311			-1.08749	-0.487892	-0.703371	-1.04575	-1.01236
Q8WUA2	Peptidyl-prolyl cis-trans isomerase-like 4	PPIL4		metabolic process;regulation of biological process	cytosol;nucleus	catalytic activity;RNA binding	6		mRNA Splicing - Major Pathway			191947	228401	211564			66914.4	81419.3		101078	214991	163498	70356.8		17.5503	17.8012	17.6907			16.03	16.3131		16.6251	17.7139	17.3189	16.1024		-1.59601	-1.48233	-1.59565			-2.77067	-2.73112		-2.03143	-1.26229	-1.42772	-1.90528
Q02413	Desmoglein-1	DSG1		cell death;cell organization and biogenesis;regulation of biological process;response to stimulus;transport	cytoskeleton;cytosol;membrane	metal ion binding;protein binding	18	Staphylococcus aureus infection	Apoptotic cleavage of cell adhesion proteins; Formation of the cornified envelope; Neutrophil degranulation			60522.7	63281.3	77468.3	37621.7	48069.7	23837.9	39783.9	15592	32758.9	29625.9	46478.4	13489.5		15.8852	15.9495	16.2413	15.1993	15.5528	14.541	15.2799	13.9285	14.9996	14.8546	15.5043	13.7196		-3.26117	-3.33405	-3.04507	-3.02102	-3.20384	-4.25973	-3.76431	-4.09171	-3.65694	-4.12164	-3.24236	-4.28813
P51153	Ras-related protein Rab-13	RAB13		cell organization and biogenesis;cellular component movement;metabolic process;regulation of biological process;response to stimulus;transport	cytosol;endosome;Golgi;membrane	catalytic activity;nucleotide binding;protein binding	1	Tight junction	Translocation of GLUT4 to the plasma membrane; RAB GEFs exchange GTP for GDP on RABs; RAB geranylgeranylation			297910	235465	306178	187357	109535	200230	200186	39748.7	123168	134233	172397	48673.2		18.1845	17.8452	18.224	17.5154	16.741	17.6113	17.611	15.2786	16.9103	17.0344	17.3954	15.5708		-0.961844	-1.43839	-1.06237	-0.704867	-2.01565	-1.1894	-1.43323	-2.7416	-1.74627	-1.94183	-1.35126	-2.43684
Q8NBM4	Ubiquitin-associated domain-containing protein 2	UBAC2			endoplasmic reticulum;membrane	catalytic activity;protein binding	13					217646	246883	203941	29833.5	107762	53104.3	89554	14367.6	55892.5	75196.8	112330	16257.5		17.7316	17.9135	17.6378	14.8646	16.7175	15.6965	16.4505	13.8105	15.7704	16.1984	16.7774	13.9888		-1.41474	-1.37007	-1.6486	-3.35566	-2.03918	-3.10415	-2.59373	-4.20969	-2.88617	-2.77782	-1.96925	-4.01887
O95573	Long-chain-fatty-acid--CoA ligase 3	ACSL3		cell organization and biogenesis;metabolic process;regulation of biological process;response to stimulus;transport	endoplasmic reticulum;Golgi;membrane;mitochondrion	catalytic activity;nucleotide binding;protein binding	2	Peroxisome; Fatty acid degradation; PPAR signaling pathway; Fatty acid biosynthesis; Metabolic pathways; Adipocytokine signaling pathway; Fatty acid metabolism	Synthesis of very long-chain fatty acyl-CoAs	Fatty Acid Beta Oxidation; Fatty Acid Biosynthesis; Mitochondrial LC-Fatty Acid Beta-Oxidation; PPAR signaling pathway		275702	221753	257483	144106	137540	153766	160841	76189.1	98922.1	153155	121608	87623		18.0728	17.7586	17.9741	17.1368	17.0695	17.2304	17.2953	16.2173	16.594	17.2246	16.8919	16.419		-1.07361	-1.52494	-1.31227	-1.08353	-1.68718	-1.57032	-1.74893	-1.80293	-2.06253	-1.75157	-1.85475	-1.58866
Q96HA7	Tonsoku-like protein	TONSL		metabolic process;regulation of biological process;response to stimulus	cytoplasm;nucleus	protein binding	8					109506			57813.9					77370.2					16.7406			15.8191					16.2395					-2.40571			-2.40117					-2.41705
P16989	Y-box-binding protein 3	CSDA; YBX3		metabolic process;regulation of biological process;response to stimulus	cytoplasm;cytosol;nucleus	DNA binding;protein binding;RNA binding	12	Tight junction		RalA downstream regulated genes; Apoptosis-related network due to altered Notch3 in ovarian cancer		952560	950798	711029	187200	297340	299093	361800	181115	246429	254875	221685	145901		19.8615	19.8588	19.4395	17.5142	18.1818	18.1902	18.4648	17.4665	17.9108	17.9594	17.7582	17.1546		0.715087	0.57524	0.153162	-0.706082	-0.574923	-0.610463	-0.579373	-0.553676	-0.745726	-1.01677	-0.988479	-0.853052
Q4KMQ2	Anoctamin-6	ANO6		cell organization and biogenesis;cellular component movement;cellular homeostasis;coagulation;regulation of biological process;response to stimulus;transport	cell surface;cytosol;membrane	protein binding;transporter activity	12		Neutrophil degranulation; Stimuli-sensing channels			163166	169682	244217	42272.9	66421	59158	151173	11084.9	88138.2	75822.7	115749	15744.5		17.316	17.3725	17.8978	15.3674	16.0194	15.8523	17.2058	13.4363	16.4275	16.2103	16.8206	13.9426		-1.83038	-1.91107	-1.38858	-2.85285	-2.73732	-2.94841	-1.83837	-4.58392	-2.22906	-2.76586	-1.92599	-4.06512
O75489	NADH dehydrogenase [ubiquinone] iron-sulfur protein 3, mitochondrial	NDUFS3		cell organization and biogenesis;metabolic process;regulation of biological process;transport	membrane;mitochondrion;organelle lumen	catalytic activity;protein binding	11	Huntington's disease; Parkinson's disease; Alzheimer's disease; Oxidative phosphorylation; Non-alcoholic fatty liver disease (NAFLD); Metabolic pathways	Complex I biogenesis	Electron Transport Chain; Oxidative phosphorylation		1.01238e+06	1.2962e+06	1.00623e+06	789444	589440	638820	618531	417165	438333	719328	575621	329334		19.9493	20.3059	19.9405	19.5905	19.169	19.2851	19.2385	18.6703	18.7417	19.4563	19.1348	18.3292		0.80296	1.02232	0.654147	1.37018	0.412309	0.484354	0.194281	0.650038	0.0851294	0.480085	0.38813	0.321509
O00217	NADH dehydrogenase [ubiquinone] iron-sulfur protein 8, mitochondrial	NDUFS8		cell organization and biogenesis;metabolic process;response to stimulus;transport	membrane;mitochondrion;organelle lumen	catalytic activity;metal ion binding	11	Huntington's disease; Parkinson's disease; Alzheimer's disease; Oxidative phosphorylation; Non-alcoholic fatty liver disease (NAFLD); Metabolic pathways	Complex I biogenesis	Electron Transport Chain; Oxidative phosphorylation		471805	579678	426219	198250	277176	246488	307596	103542	214763	332325	178973	92263.1		18.8478	19.1449	18.7012	17.597	18.0804	17.9112	18.2307	16.6599	17.7124	18.3422	17.4494	16.4935		-0.298532	-0.138647	-0.585151	-0.623342	-0.676232	-0.889536	-0.81353	-1.36037	-0.944155	-0.633969	-1.29725	-1.51422
Q7Z434	Mitochondrial antiviral-signaling protein	MAVS		cellular component movement;defense response;metabolic process;regulation of biological process;response to stimulus;transport	membrane;mitochondrion	protein binding;signal transducer activity;transporter activity	20	NOD-like receptor signaling pathway; Hepatitis B; Cytosolic DNA-sensing pathway; Measles; Herpes simplex infection; Hepatitis C; RIG-I-like receptor signaling pathway; Influenza A	Ovarian tumor domain proteases; TRAF3-dependent IRF activation pathway; NF-kB activation through FADD/RIP-1 pathway mediated by caspase-8 and -10; Negative regulators of DDX58/IFIH1 signaling; TRAF6 mediated NF-kB activation; TRAF6 mediated IRF7 activation	RIG-I-like Receptor Signaling		1.68078e+06	1.40667e+06	1.62511e+06	521328	624444	689988	1.00938e+06	424114	973585	1.79805e+06	1.29299e+06	846673		20.6807	20.4239	20.6321	18.9918	19.2522	19.3962	19.945	18.6941	19.8929	20.778	20.3023	19.6914		1.53433	1.14031	1.34572	0.771532	0.495538	0.595515	0.900838	0.673869	1.23641	1.8018	1.55565	1.68376
P52815	39S ribosomal protein L12, mitochondrial	MRPL12		cell organization and biogenesis;metabolic process;regulation of biological process	membrane;mitochondrion;ribosome	protein binding;RNA binding;structural molecule activity	17	Ribosome	Mitochondrial translation initiation; Mitochondrial translation elongation; Mitochondrial translation termination			449008	271425	514531	316362	157215	278698	153139	151225	85920.3	151798	211166	115411		18.7764	18.0502	18.9729	18.2712	17.2624	18.0883	17.2245	17.2063	16.3907	17.2118	17.688	16.8164		-0.369983	-1.23335	-0.313489	0.0509188	-1.49429	-0.712352	-1.81972	-0.813882	-2.26583	-1.76441	-1.05861	-1.19126
Q969E2	Secretory carrier-associated membrane protein 4	SCAMP4		transport	membrane		19					385503	572418	447566	82328.6	182656	167492	311935			227598	346112			18.5564	19.1267	18.7717	16.3291	17.4788	17.3537	18.2509			17.7961	18.4009			-0.589979	-0.156831	-0.514644	-1.89119	-1.27791	-1.44696	-0.793317			-1.18008	-0.345752
P17661	Desmin	DES		cell organization and biogenesis;cellular component movement;regulation of biological process	cytoplasm;cytoskeleton;cytosol;membrane;nucleus	protein binding;structural molecule activity	2	Arrhythmogenic right ventricular cardiomyopathy (ARVC); Dilated cardiomyopathy; Hypertrophic cardiomyopathy (HCM)	Striated Muscle Contraction	Arrhythmogenic Right Ventricular Cardiomyopathy; Striated Muscle Contraction		84155.7		88900.3	45880.8			67854.4			41958.6				16.3608		16.4399	15.4856			16.0502			15.3567				-2.78559		-2.84649	-2.7347			-2.99405			-3.61953
Q8NFH3	Nucleoporin Nup43	NUP43		cell division;cell organization and biogenesis;metabolic process;regulation of biological process;transport	chromosome;cytosol;nucleus	protein binding	6	RNA transport	Rev-mediated nuclear export of HIV RNA; ISG15 antiviral mechanism; NEP/NS2 Interacts with the Cellular Export Machinery; Separation of Sister Chromatids; tRNA processing in the nucleus; Transcriptional regulation by small RNAs; Nuclear Pore Complex (NPC) Disassembly; Regulation of Glucokinase by Glucokinase Regulatory Protein; Vpr-mediated nuclear import of PICs; Regulation of HSF1-mediated heat …			1.12835e+06	1.33943e+06	1.24998e+06	423100	598611	546432	781456	333435	842222	1.1282e+06	918191	473671		20.1058	20.3532	20.2535	18.6906	19.1913	19.0597	19.5758	18.347	19.6838	20.1056	19.8084	18.8535		0.959424	1.06965	0.967084	0.47034	0.434583	0.258987	0.5316	0.326823	1.0273	1.12939	1.0618	0.845842
Q9HC21	Mitochondrial thiamine pyrophosphate carrier	SLC25A19		metabolic process;transport	membrane;mitochondrion;nucleus	transporter activity	17		Vitamin B1 (thiamin) metabolism			139796	129136	160509	64592.3	69661.9	95484.1	58797.9	39406.4	52547.7		78593.6	37107.2		17.093	16.9785	17.2923	15.9791	16.0881	16.543	15.8435	15.2661	15.6813		16.2621	15.1794		-2.0534	-2.30501	-1.99409	-2.24123	-2.66859	-2.25772	-3.20073	-2.75408	-2.9752		-2.48451	-2.82827
O15438	Canalicular multispecific organic anion transporter 2	ABCC3		transport	membrane	catalytic activity;nucleotide binding;transporter activity	17	Bile secretion; Antifolate resistance; ABC transporters	ABC-family proteins mediated transport; Recycling of bile acids and salts	Fluoropyrimidine Activity; Codeine and Morphine Metabolism; Drug Induction of Bile Acid Pathway; Constitutive Androstane Receptor Pathway; NRF2 pathway; Nuclear Receptors in Lipid Metabolism and Toxicity; Photodynamic therapy-induced NFE2L2 (NRF2) survival signaling		207719	345699	429482	39618.3	9818.16	69257.9	260766	70014.5	186899	148830	159752			17.6643	18.3992	18.7122	15.2739	13.2612	16.0797	17.9924	16.0954	17.5119	17.1833	17.2855			-1.48209	-0.884382	-0.574147	-2.94642	-5.49544	-2.721	-1.05181	-1.92486	-1.14464	-1.7929	-1.46115
Q86Y39	NADH dehydrogenase [ubiquinone] 1 alpha subcomplex subunit 11	NDUFA11		cell organization and biogenesis;metabolic process;transport	membrane;mitochondrion	catalytic activity	19	Huntington's disease; Parkinson's disease; Alzheimer's disease; Oxidative phosphorylation; Non-alcoholic fatty liver disease (NAFLD); Metabolic pathways	Complex I biogenesis	Oxidative phosphorylation		258186	285659	226178	98497.2	114392	138819	181088	54235.2	135602	183929	92129.6	71099.6		17.9781	18.1239	17.7871	16.5878	16.8036	17.0828	17.4663	15.7269	17.049	17.4888	16.4914	16.1176		-1.16831	-1.1596	-1.49928	-1.63251	-1.95305	-1.71785	-1.57787	-2.29328	-1.60752	-1.48742	-2.25525	-1.89013
P27824	Calnexin	CANX		metabolic process;regulation of biological process;response to stimulus;transport	cytoplasm;endoplasmic reticulum;membrane;organelle lumen;ribosome	metal ion binding;protein binding;RNA binding	5; CHR_HG30_PATCH	Protein processing in endoplasmic reticulum; HTLV-I infection; Phagosome; Thyroid hormone synthesis; Antigen processing and presentation	Assembly of Viral Components at the Budding Site; Antigen Presentation: Folding, assembly and peptide loading of class I MHC; Interleukin-35 Signalling; Calnexin/calreticulin cycle; MHC class II antigen presentation			2.2987e+06	2.2961e+06	3.01857e+06	886853	966535	1.41295e+06	1.45993e+06	714460	823199	1.32757e+06	1.5084e+06	681905		21.1324	21.1308	21.5254	19.7583	19.8825	20.4303	20.4775	19.4465	19.6509	20.3404	20.5246	19.3792		1.98602	1.84722	2.23905	1.53804	1.12579	1.62958	1.43326	1.42627	0.994342	1.36415	1.77795	1.37153
Q9NZN4	EH domain-containing protein 2	EHD2		cell organization and biogenesis;coagulation;regulation of biological process;transport	cytoplasm;cytoskeleton;cytosol;endosome;membrane;nucleus	catalytic activity;metal ion binding;nucleotide binding;protein binding	19	Endocytosis	Factors involved in megakaryocyte development and platelet production	Insulin Signaling		517420	472755	283782	246695	170784	194313	244791	156333	155977	158602	303330	206513		18.981	18.8507	18.1144	17.9124	17.3818	17.568	17.9012	17.2543	17.251	17.275	18.2105	17.6559		-0.165388	-0.432805	-1.17196	-0.307932	-1.37487	-1.23267	-1.14302	-0.765958	-1.40556	-1.70116	-0.536103	-0.351812
P61353	60S ribosomal protein L27	RPL27		cell organization and biogenesis;metabolic process;transport	cytosol;membrane;nucleus;ribosome	RNA binding;structural molecule activity	17	Ribosome	Peptide chain elongation; Eukaryotic Translation Termination; Viral mRNA Translation; L13a-mediated translational silencing of Ceruloplasmin expression; Nonsense Mediated Decay (NMD) independent of the Exon Junction Complex (EJC); Selenocysteine synthesis; Nonsense Mediated Decay (NMD) enhanced by the Exon Junction Complex (EJC); GTP hydrolysis and joining of the 60S ribosomal subunit; Major path…	Cytoplasmic Ribosomal Proteins		5.88394e+06	8.07776e+06	6.25982e+06	2.6355e+06	3.75546e+06	3.3664e+06	3.72633e+06	2.00648e+06	6.11567e+06	7.06588e+06	4.31642e+06	3.25613e+06		22.4884	22.9455	22.5777	21.3296	21.8406	21.6828	21.8293	20.9362	22.5441	22.7524	22.0414	21.6347		3.34199	3.66198	3.2913	3.10935	3.08388	2.88208	2.78512	2.91601	3.88754	3.77623	3.29477	3.62705
Q5HYI7	Metaxin-3	MTX3		transport	membrane;mitochondrion		5					104269	110088	95371.9	71476.8	60295.2	51656.1		42908.7	94332.6	72925.7	83354.3	66770.7		16.67	16.7483	16.5413	16.1252	15.8798	15.6567		15.389	16.5255	16.1541	16.347	16.0269		-2.47641	-2.53524	-2.74511	-2.09511	-2.87692	-3.14405		-2.63124	-2.13107	-2.82206	-2.39966	-1.98075
Q9ULF5	Zinc transporter ZIP10	SLC39A10		cellular homeostasis;regulation of biological process;transport	membrane	transporter activity	2		Zinc influx into cells by the SLC39 gene family	NRF2 pathway; Zinc homeostasis		178458	170591	248811	104486	81061.3	56226.1	137406	79249	73874.5	77961.6	160790	64417.9		17.4452	17.3802	17.9247	16.673	16.3067	15.779	17.0681	16.2741	16.1728	16.2505	17.2948	15.9752		-1.70114	-1.90336	-1.36169	-1.54734	-2.44995	-3.02174	-1.97612	-1.74612	-2.48375	-2.72573	-1.45182	-2.03251
Q9Y4W6	AFG3-like protein 2	AFG3L2		cell organization and biogenesis;cellular homeostasis;metabolic process;regulation of biological process;response to stimulus;transport	membrane;mitochondrion	catalytic activity;metal ion binding;nucleotide binding;protein binding	18		Processing of SMDT1			868385	1.09019e+06	1.15577e+06	478207	628679	604153	608038	349035	460597	520728	546950	313204		19.728	20.0561	20.1404	18.8673	19.262	19.2046	19.2138	18.413	18.8131	18.9902	19.061	18.2567		0.581613	0.772603	0.854033	0.646976	0.50529	0.403859	0.169598	0.392792	0.156607	0.0139637	0.314418	0.249059
Q15005	Signal peptidase complex subunit 2	SPCS2		metabolic process;transport	endoplasmic reticulum;membrane	catalytic activity	11	Protein export	Synthesis, secretion, and inactivation of Glucagon-like Peptide-1 (GLP-1); Synthesis, secretion, and deacylation of Ghrelin; SRP-dependent cotranslational protein targeting to membrane; Synthesis, secretion, and inactivation of Glucose-dependent Insulinotropic Polypeptide (GIP)			1.99553e+06	1.52809e+06	1.11995e+06	81720	216641	411038	432208	120012	258072	428632	314547	85851.5		20.9283	20.5433	20.095	16.3184	17.7249	18.6489	18.7214	16.8728	17.9774	18.7094	18.2629	16.3896		1.78198	1.25976	0.808612	-1.9019	-1.03173	-0.151784	-0.322838	-1.1474	-0.679123	-0.266824	-0.483714	-1.61813
Q96DI7	U5 small nuclear ribonucleoprotein 40 kDa protein	SNRNP40		cell organization and biogenesis;metabolic process	cytosol;nucleus;spliceosomal complex	protein binding;RNA binding	1	Spliceosome	mRNA Splicing - Major Pathway; mRNA Splicing - Minor Pathway	mRNA Processing		1.5041e+06	1.71837e+06	1.33041e+06	524448	761045	704950	977654	362496	1.13988e+06	1.16046e+06	866612	515693		20.5205	20.7126	20.3434	19.0004	19.5376	19.4272	19.899	18.4676	20.1204	20.1463	19.725	18.9762		1.37411	1.42907	1.05706	0.78014	0.780947	0.626467	0.85476	0.447385	1.46391	1.17006	0.978395	0.96847
O00194	Ras-related protein Rab-27B	RAB27B		regulation of biological process;response to stimulus;transport	Golgi;membrane	catalytic activity;nucleotide binding;protein binding	18	Pancreatic secretion	Platelet degranulation ; RAB GEFs exchange GTP for GDP on RABs; RAB geranylgeranylation	Deregulation of Rab and Rab Effector Genes in Bladder Cancer		111257	103091		64298.3	59381.1	44641.3	26737.2		44987.2		64178.4			16.7635	16.6536		15.9725	15.8577	15.4461	14.7066		15.4572		15.9698			-2.38283	-2.62999		-2.24781	-2.89896	-3.3546	-4.33764		-3.19931		-2.77683
Q13573	SNW domain-containing protein 1	SNW1		cell organization and biogenesis;metabolic process;regulation of biological process;response to stimulus	nucleus;spliceosomal complex	catalytic activity;protein binding;RNA binding	14	Viral carcinogenesis; Epstein-Barr virus infection; Spliceosome; Notch signaling pathway	NOTCH1 Intracellular Domain Regulates Transcription; SMAD2/SMAD3:SMAD4 heterotrimer regulates transcription; mRNA Splicing - Major Pathway; Constitutive Signaling by NOTCH1 PEST Domain Mutants; RUNX3 regulates NOTCH signaling; Notch-HLH transcription pathway; Constitutive Signaling by NOTCH1 HD+PEST Domain Mutants; Pre-NOTCH Transcription and Translation	TGF-beta Signaling Pathway; RIG-I-like Receptor Signaling; Notch Signaling Pathway		2.32525e+06	3.33075e+06	2.62147e+06	1.08318e+06	1.38467e+06	1.38046e+06	1.82365e+06	780552	2.04291e+06	2.24094e+06	1.72594e+06	1.18129e+06		21.149	21.6674	21.3219	20.0468	20.4011	20.3967	20.7984	19.5741	20.9622	21.0957	20.719	20.1719		2.00259	2.38387	2.03556	1.82654	1.64443	1.59602	1.75419	1.55391	2.30565	2.11946	1.97232	2.16425
Q92896	Golgi apparatus protein 1	GLG1		cellular component movement;regulation of biological process	Golgi;membrane	protein binding	16	Cell adhesion molecules (CAMs)	Cell surface interactions at the vascular wall			470203	439859	747195	52449.5	165113	173700	234151	28056.8	203145	253290	276039	63567.9		18.8429	18.7467	19.5111	15.6786	17.3331	17.4062	17.8371	14.7761	17.6322	17.9504	18.0745	15.956		-0.303439	-0.536859	0.22474	-2.54166	-1.42358	-1.39446	-1.20713	-3.24416	-1.02439	-1.02578	-0.672118	-2.05167
P29590	Protein PML	PML		cell death;cell differentiation;cell organization and biogenesis;cellular component movement;cellular homeostasis;defense response;metabolic process;regulation of biological process;response to stimulus;transport	cytoplasm;cytosol;endoplasmic reticulum;endosome;membrane;nucleus	DNA binding;metal ion binding;protein binding	15	Endocytosis; Ubiquitin mediated proteolysis; Acute myeloid leukemia; Pathways in cancer; Transcriptional misregulation in cancer; Herpes simplex infection; Influenza A	Interferon gamma signaling; Regulation of TP53 Activity through Acetylation; Regulation of RUNX1 Expression and Activity; SUMOylation of DNA damage response and repair proteins; Regulation of PTEN localization	miRNA Regulation of DNA Damage Response; Wnt/beta-catenin Signaling Pathway in Leukemia; TGF-beta Signaling Pathway; DNA Damage Response		88064.2	154422		70106.9				62872.5			103725	71631		16.4263	17.2365		16.0973				15.9401			16.6624	16.1283		-2.7201	-2.04702		-2.12303				-2.08008			-2.08423	-1.87939
P16220	Cyclic AMP-responsive element-binding protein 1	CREB1		cell differentiation;cell organization and biogenesis;cellular component movement;metabolic process;regulation of biological process;response to stimulus;transport	chromosome;mitochondrion;nucleus;organelle lumen	DNA binding;protein binding	2	Viral carcinogenesis; Dopaminergic synapse; TNF signaling pathway; Osteoclast differentiation; Hepatitis B; Amphetamine addiction; cGMP-PKG signaling pathway; Renin secretion; Huntington's disease; Circadian entrainment; Prostate cancer; Insulin secretion; Adrenergic signaling in cardiomyocytes; Tuberculosis; Glucagon signaling pathway; HTLV-I infection; Thyroid hormone synthesis; Melanogenesis; …	NCAM signaling for neurite out-growth; Activated TLR4 signalling; Signaling by GPCR; AKT phosphorylates targets in the nucleus; CREB phosphorylation through the activation of Adenylate Cyclase; BMAL1:CLOCK,NPAS2 activates circadian gene expression; CREB phosphorylation through the activation of CaMKII; CREB phosphorylation; CREB phosphorylation through the activation of CaMKK; Constitutive Signal…	Androgen receptor signaling pathway; miRNA Regulation of DNA Damage Response; Energy Metabolism; miRNAs involved in DNA damage response; Folate-Alcohol and Cancer Pathway; Sterol Regulatory Element-Binding Proteins (SREBP) signalling; Integrated Breast Cancer Pathway; Human Thyroid Stimulating Hormone (TSH) signaling pathway; Leptin signaling pathway; Follicle Stimulating Hormone (FSH) signaling …		136989	493000			47345.7					128455				17.0637	18.9112			15.5309					16.9709				-2.08266	-0.372313			-3.22573					-2.0053
P30049	ATP synthase subunit delta, mitochondrial	ATP5D		cell organization and biogenesis;metabolic process;response to stimulus;transport	membrane;mitochondrion;organelle lumen	catalytic activity;nucleotide binding;transporter activity	19	Huntington's disease; Parkinson's disease; Alzheimer's disease; Oxidative phosphorylation; Metabolic pathways	Cristae formation; Formation of ATP by chemiosmotic coupling	Electron Transport Chain; Oxidative phosphorylation		187803	256652	308939	62051.1	95841.8	112465	151465	36090.1	54229.7	69176.6	118072	29696.2		17.5189	17.9695	18.237	15.9212	16.5484	16.7791	17.2086	15.1393	15.7268	16.078	16.8493	14.858		-1.6275	-1.31409	-1.04942	-2.29913	-2.20831	-2.02158	-1.83558	-2.8809	-2.92974	-2.89821	-1.89733	-3.14969
Q9NVS2	39S ribosomal protein S18a, mitochondrial	MRPS18A		cell organization and biogenesis;metabolic process	membrane;mitochondrion;ribosome	structural molecule activity	6	Ribosome	Mitochondrial translation initiation; Mitochondrial translation elongation; Mitochondrial translation termination			361554	314721	339417	139848	127008	233166	225980	39091.9	197052	243478	185021	65655.4		18.4639	18.2637	18.3727	17.0935	16.9546	17.831	17.7858	15.2546	17.5882	17.8934	17.4973	16.0026		-0.68251	-1.01983	-0.913689	-1.1268	-1.80212	-0.969695	-1.25837	-2.76564	-1.06832	-1.08277	-1.2493	-2.00506
P54289	Voltage-dependent calcium channel subunit alpha-2/delta-1	CACNA2D1		cellular homeostasis;regulation of biological process;transport	endoplasmic reticulum;membrane	metal ion binding;transporter activity	7	Arrhythmogenic right ventricular cardiomyopathy (ARVC); Dilated cardiomyopathy; MAPK signaling pathway; Oxytocin signaling pathway; Adrenergic signaling in cardiomyocytes; Cardiac muscle contraction; Hypertrophic cardiomyopathy (HCM)	Phase 0 - rapid depolarisation; Phase 2 - plateau phase	Arrhythmogenic Right Ventricular Cardiomyopathy		211403	299146	274116	177207	66339.7	63226	192060	146883	140625	188040	205737	140023		17.6896	18.1905	18.0644	17.4351	16.0176	15.9482	17.5512	17.1643	17.1015	17.5207	17.6504	17.0953		-1.45673	-1.09305	-1.22196	-0.785222	-2.73909	-2.85247	-1.49301	-0.855912	-1.55505	-1.45553	-1.09619	-0.912378
Q92522	Histone H1x	H1FX		cell organization and biogenesis	chromosome;nucleus	DNA binding;protein binding;RNA binding	3					7.00523e+06	4.80976e+06	5.02216e+06	1.99847e+06	2.4131e+06	2.48393e+06	3.07489e+06	1.71009e+06	1.74572e+06	2.16085e+06	1.78297e+06	1.06579e+06		22.74	22.1975	22.2599	20.9305	21.2025	21.2442	21.5521	20.7056	20.7354	21.0432	20.7659	20.0235		3.59364	2.91399	2.97349	2.71017	2.44578	2.4435	2.5079	2.68541	2.07885	2.06696	2.01922	2.01581
Q9NUQ6	SPATS2-like protein	SPATS2L			cytoplasm;cytosol;nucleus	protein binding;RNA binding	2					173088	216974	248950	184566	136711	126269	137158	61383.5	162001	161046	196214	61916.1		17.4011	17.7272	17.9255	17.4938	17.0608	16.9461	17.0655	15.9056	17.3056	17.2971	17.5821	15.918		-1.74522	-1.55638	-1.36089	-0.726526	-1.69591	-1.85456	-1.97872	-2.11466	-1.3509	-1.67909	-1.16456	-2.08966
P49768	Presenilin-1	PSEN1		cell death;cell differentiation;cell organization and biogenesis;cell proliferation;cellular component movement;cellular homeostasis;metabolic process;regulation of biological process;response to stimulus;transport	cell surface;chromosome;cytoplasm;endoplasmic reticulum;Golgi;membrane;mitochondrion;nucleus	catalytic activity;protein binding;transporter activity	14	Neurotrophin signaling pathway; Wnt signaling pathway; Alzheimer's disease; Notch signaling pathway	Activated NOTCH1 Transmits Signal to the Nucleus; Signaling by NOTCH4; Regulated proteolysis of p75NTR; Constitutive Signaling by NOTCH1 HD+PEST Domain Mutants; NRIF signals cell death from the nucleus; Signaling by NOTCH3; EPH-ephrin mediated repulsion of cells; NOTCH2 Activation and Transmission of Signal to the Nucleus; Degradation of the extracellular matrix; Neutrophil degranulation; Constit…	Alzheimers Disease; Notch Signaling Pathway; Canonical and Non-canonical Notch signaling; Notch Signaling Pathway		54360	136095	80824				60463.5		68217		61196.5			15.7303	17.0543	16.3025				15.8838		16.0578		15.9012			-3.41611	-2.22928	-2.98389				-3.16043		-2.5987		-2.84547
P30086	Phosphatidylethanolamine-binding protein 1	PEBP1		metabolic process;regulation of biological process;response to stimulus	cytoplasm;cytosol;nucleus	enzyme regulator activity;nucleotide binding;protein binding;RNA binding	12		Paradoxical activation of RAF signaling by kinase inactive BRAF; Signaling by BRAF and RAF fusions; MAP2K and MAPK activation; Negative regulation of MAPK pathway; Signaling by RAS mutants; Signaling by high-kinase activity BRAF mutants; Signaling by moderate kinase activity BRAF mutants; Interleukin-20 family signaling	EGF/EGFR Signaling Pathway		26939.9		48427.5	99168.5							340856	160020		14.7175		15.5635	16.5976							18.3788	17.2879		-4.42891		-3.72285	-1.62271							-0.367828	-0.719786
Q9NP72	Ras-related protein Rab-18	RAB18		cell organization and biogenesis;development;regulation of biological process;response to stimulus;transport	cytosol;Golgi;membrane	catalytic activity;nucleotide binding;protein binding	10		COPI-independent Golgi-to-ER retrograde traffic; Neutrophil degranulation; RAB GEFs exchange GTP for GDP on RABs; RAB geranylgeranylation			291119	263628	355666	101151	132819	174129	177676	69431.2	111750	180698	142220	58377.7		18.1512	18.0081	18.4402	16.6262	17.0191	17.4098	17.4389	16.0833	16.7699	17.4632	17.1178	15.8331		-0.995114	-1.2754	-0.846223	-1.59415	-1.73757	-1.3909	-1.60532	-1.93693	-1.88663	-1.51298	-1.62886	-2.17455
Q9NP92	39S ribosomal protein S30, mitochondrial	MRPS30		cell death;cell organization and biogenesis;metabolic process	membrane;mitochondrion;ribosome	RNA binding;structural molecule activity	5		Mitochondrial translation initiation; Mitochondrial translation elongation; Mitochondrial translation termination			475739	401842	526208	218540	222490	313304	295783	146510	207891	390595	188470	134768		18.8598	18.6163	19.0053	17.7375	17.7634	18.2572	18.1742	17.1606	17.6655	18.5753	17.524	17.0401		-0.286551	-0.667272	-0.281112	-0.48276	-0.993293	-0.543491	-0.870025	-0.859586	-0.99107	-0.400892	-1.22265	-0.967562
Q92934	Bcl2-associated agonist of cell death	BAD		cell death;cell organization and biogenesis;cell proliferation;metabolic process;regulation of biological process;response to stimulus	cytoplasm;cytosol;membrane;mitochondrion	enzyme regulator activity;protein binding	11	Viral carcinogenesis; Hepatitis B; Insulin signaling pathway; Pancreatic cancer; cGMP-PKG signaling pathway; Chronic myeloid leukemia; Neurotrophin signaling pathway; VEGF signaling pathway; Acute myeloid leukemia; Non-small cell lung cancer; Endometrial cancer; Colorectal cancer; ErbB signaling pathway; Pathways in cancer; Prostate cancer; Thyroid hormone signaling pathway; Tuberculosis; Melanom…	AKT phosphorylates targets in the cytosol; NRAGE signals death through JNK; Activation of BAD and translocation to mitochondria ; Signalling by NGF; Constitutive Signaling by AKT1 E17K in Cancer; BH3-only proteins associate with and inactivate anti-apoptotic BCL-2 members	Leptin signaling pathway; IL-7 Signaling Pathway; Alzheimers Disease; TNF alpha Signaling Pathway; Brain-Derived Neurotrophic Factor (BDNF) signaling pathway; Amyotrophic lateral sclerosis (ALS); Apoptosis; IL-3 Signaling Pathway; Kit receptor signaling pathway; Focal Adhesion; Rac1/Pak1/p38/MMP-2 pathway; IL-6 signaling pathway; PI3K-AKT-mTOR signaling pathway and therapeutic opportunities; Foca…		105769	125847	146607	64671.8	64795	98781.2	70866.2			96547.5	79417.6	45548		16.6906	16.9413	17.1616	15.9808	15.9836	16.5919	16.1128			16.559	16.2772	15.4751		-2.45581	-2.34223	-2.12479	-2.23945	-2.77308	-2.20875	-2.93139			-2.41725	-2.46946	-2.53258
Q5VT66	Mitochondrial amidoxime-reducing component 1	MARC1		metabolic process;response to stimulus	membrane;mitochondrion	catalytic activity;metal ion binding	1		Phase I - Functionalization of compounds			119828	188374	146663	110245	70335.6	97756.1	133153	30741.1	101136	157058	87959.8	57152		16.8706	17.5232	17.1621	16.7504	16.102	16.5769	17.0227	14.9079	16.6259	17.2609	16.4246	15.8025		-2.27575	-1.7603	-2.12424	-1.46994	-2.65471	-2.2238	-2.02147	-3.11234	-2.0306	-1.71526	-2.32207	-2.20517
P17677	Neuromodulin	GAP43		cell differentiation;cell organization and biogenesis;cellular component movement;development;regulation of biological process;response to stimulus	cytoplasm;membrane	protein binding	3		L1CAM interactions	Glial Cell Differentiation; Spinal Cord Injury		161750	125553	82211.5	43831.2	31638.8	73368.8	58293.5	36344.2	42647.8	41190.5		21160.7		17.3034	16.9379	16.3271	15.4197	14.9494	16.1629	15.831	15.1494	15.3802	15.33		14.3691		-1.84296	-2.3456	-2.95933	-2.80063	-3.80727	-2.63782	-3.21316	-2.87078	-3.27635	-3.64618		-3.63859
Q9BVI4	Nucleolar complex protein 4 homolog	NOC4L		metabolic process	membrane;nucleus	protein binding;RNA binding	12		Major pathway of rRNA processing in the nucleolus and cytosol; rRNA modification in the nucleus and cytosol			1.45561e+06	1.65442e+06	1.03446e+06	315153	664098	465397	865326	151845	205799	801973	158331	203415		20.4732	20.6579	19.9805	18.2657	19.341	18.8281	19.7229	17.2122	17.6509	19.6132	17.2726	17.6341		1.32683	1.37435	0.694064	0.0453947	0.584362	0.027408	0.67868	-0.807982	-1.00566	0.636988	-1.47405	-0.373616
P51674	Neuronal membrane glycoprotein M6-a	GPM6A		cell differentiation;cell organization and biogenesis;cellular component movement;regulation of biological process;transport	membrane	protein binding;transporter activity	4							43964.1	29526.2	8100.28	18433.7		12894.5	20186.5							15.424	14.8497	12.9838	14.1701		13.6545	14.3011							-3.86235	-3.37059	-5.77292	-4.63064		-4.36575	-4.35543
Q86SF2	N-acetylgalactosaminyltransferase 7	GALNT7		metabolic process	Golgi;membrane	catalytic activity;metal ion binding	4	Mucin type O-glycan biosynthesis; Metabolic pathways	O-linked glycosylation of mucins			387015	410109	501489	49444.7	150727	227695	246524	5441.89	186711	279511	294927	60588.6		18.562	18.6456	18.9359	15.5935	17.2016	17.7967	17.9114	12.4099	17.5104	18.0925	18.17	15.8868		-0.584333	-0.637891	-0.350528	-2.62677	-1.5551	-1.00395	-1.13284	-5.61033	-1.1461	-0.883661	-0.576632	-2.12092
P43353	Aldehyde dehydrogenase family 3 member B1	ALDH3B1		metabolic process;response to stimulus;transport	cytoplasm;cytosol;membrane	catalytic activity;protein binding	11	Tyrosine metabolism; Histidine metabolism; beta-Alanine metabolism; Metabolism of xenobiotics by cytochrome P450; Drug metabolism - cytochrome P450; Chemical carcinogenesis; Glycolysis / Gluconeogenesis; Phenylalanine metabolism; Metabolic pathways	Neutrophil degranulation; Sphingolipid de novo biosynthesis			284364	153621	212024	169940	90362.8	136552	124698	76157.8	87187.8	230835	171518	75992.1		18.1174	17.229	17.6939	17.3747	16.4634	17.0591	16.9281	16.2167	16.4118	17.8165	17.388	16.2136		-1.02898	-2.05452	-1.59252	-0.845636	-2.29323	-1.74161	-2.11613	-1.80352	-2.2447	-1.1597	-1.35863	-1.79412
P18124	60S ribosomal protein L7	RPL7		cell organization and biogenesis;metabolic process;transport	cytoplasm;cytosol;membrane;nucleus;ribosome	DNA binding;protein binding;RNA binding;structural molecule activity	8	Ribosome	Peptide chain elongation; Eukaryotic Translation Termination; Viral mRNA Translation; L13a-mediated translational silencing of Ceruloplasmin expression; Nonsense Mediated Decay (NMD) independent of the Exon Junction Complex (EJC); Selenocysteine synthesis; Nonsense Mediated Decay (NMD) enhanced by the Exon Junction Complex (EJC); GTP hydrolysis and joining of the 60S ribosomal subunit; Major path…	Cytoplasmic Ribosomal Proteins		1.17974e+07	1.24158e+07	1.09614e+07	4.1955e+06	5.92896e+06	5.74172e+06	7.81462e+06	3.24448e+06	8.09879e+06	9.08336e+06	6.44161e+06	4.40565e+06		23.492	23.5657	23.3859	22.0004	22.4993	22.4531	22.8977	21.6296	22.9493	23.1148	22.619	22.0709		4.3456	4.28213	4.09954	3.78011	3.74267	3.65235	3.85354	3.60933	4.29274	4.13859	3.87236	4.06324
Q14344	Guanine nucleotide-binding protein subunit alpha-13	GNA13		cell differentiation;cellular component movement;cellular homeostasis;regulation of biological process;response to stimulus	cytoplasm;cytosol;membrane;nucleus	catalytic activity;metal ion binding;nucleotide binding;protein binding;signal transducer activity	17	Vascular smooth muscle contraction; Phospholipase D signaling pathway; cGMP-PKG signaling pathway; Pathways in cancer; Long-term depression; Regulation of actin cytoskeleton; Sphingolipid signaling pathway; Platelet activation	Thrombin signalling through proteinase activated receptors (PARs); G alpha (12/13) signalling events; NRAGE signals death through JNK; Thromboxane signalling through TP receptor; Rho GTPase cycle; Signalling by NGF	Human Thyroid Stimulating Hormone (TSH) signaling pathway; G Protein Signaling Pathways; Regulation of Actin Cytoskeleton; G13 Signaling Pathway		357370	140368	281554	160948	98690.1	144169	217923	39873.8	154037	151083	164627	65629.5		18.4471	17.0989	18.1031	17.2962	16.5906	17.1374	17.7335	15.2832	17.2329	17.205	17.3288	16.0021		-0.699304	-2.18468	-1.18333	-0.924063	-2.16606	-1.66329	-1.31075	-2.73707	-1.42363	-1.77123	-1.41779	-2.00563
Q15836	Vesicle-associated membrane protein 3	VAMP3		cell organization and biogenesis;regulation of biological process;transport	cell surface;cytosol;endosome;membrane	protein binding	1	Phagosome; SNARE interactions in vesicular transport	Cargo recognition for clathrin-mediated endocytosis; ER-Phagosome pathway; Retrograde transport at the Trans-Golgi-Network			208947	304335	357534	98144	85003.4	153626	186974	81180.7	98816	150220	200821	55791.4		17.6728	18.2153	18.4477	16.5826	16.3752	17.2291	17.5125	16.3088	16.5925	17.1967	17.6156	15.7678		-1.47358	-1.06824	-0.838665	-1.63769	-2.38144	-1.57163	-1.53173	-1.71137	-2.06408	-1.77949	-1.13108	-2.23993
Q13795	ADP-ribosylation factor-related protein 1	ARFRP1		cell organization and biogenesis;regulation of biological process;response to stimulus;transport	cytosol;Golgi;membrane	catalytic activity;nucleotide binding;protein binding;signal transducer activity	20		Retrograde transport at the Trans-Golgi-Network			285709		282867	81222.9	102693	121599			78125.1	113179	105363			18.1242		18.1098	16.3096	16.648	16.8918			16.2535	16.7882	16.685			-1.02218		-1.17662	-1.9107	-2.10869	-1.90892			-2.40304	-2.18796	-2.06163
P24539	ATP synthase F(0) complex subunit B1, mitochondrial	ATP5F1		cell organization and biogenesis;metabolic process;transport	membrane;mitochondrion;nucleus;organelle lumen	catalytic activity;protein binding;transporter activity	1	Huntington's disease; Parkinson's disease; Alzheimer's disease; Oxidative phosphorylation; Metabolic pathways	Cristae formation; Formation of ATP by chemiosmotic coupling	Electron Transport Chain; Oxidative phosphorylation		1.82956e+06	2.45494e+06	2.08551e+06	333192	675395	858672	1.10613e+06	237821	683954	780709	709216	222085		20.8031	21.2273	20.992	18.346	19.3654	19.7117	20.0771	17.8595	19.3835	19.5744	19.4359	17.7608		1.6567	1.94372	1.70558	0.125693	0.608697	0.911052	1.03288	-0.160707	0.727001	0.59822	0.689235	-0.246928
P17858	ATP-dependent 6-phosphofructokinase, liver type	PFKL		cell organization and biogenesis;metabolic process;regulation of biological process;response to stimulus;transport	cytoplasm;cytosol;extracellular;membrane;organelle lumen	catalytic activity;metal ion binding;nucleotide binding;protein binding	21	HIF-1 signaling pathway; Central carbon metabolism in cancer; Carbon metabolism; Galactose metabolism; Glucagon signaling pathway; Fructose and mannose metabolism; Pentose phosphate pathway; AMPK signaling pathway; Glycolysis / Gluconeogenesis; RNA degradation; Biosynthesis of amino acids; Metabolic pathways	Glycolysis; Neutrophil degranulation	Photodynamic therapy-induced HIF-1 survival signaling; Insulin Signaling; Glycolysis and Gluconeogenesis		169715	160188	154354	70715.4			218289	75240.1	161843	127591	107563	84882.9		17.3728	17.2894	17.2359	16.1097			17.7359	16.1992	17.3042	16.9612	16.7148	16.3732		-1.77361	-1.99413	-2.0505	-2.11056			-1.30833	-1.82101	-1.3523	-2.01504	-2.03181	-1.6345
Q15629	Translocating chain-associated membrane protein 1	TRAM1		cell organization and biogenesis;transport	endoplasmic reticulum;membrane	protein binding;receptor activity	8	Protein processing in endoplasmic reticulum	SRP-dependent cotranslational protein targeting to membrane	TLR4 Signaling and Tolerance		884354	495367	950089	77297.3	220922	279344	447818	24553.7	138551	201892	401873	167330		19.7543	18.9181	19.8577	16.2381	17.7532	18.0917	18.7726	14.5837	17.0801	17.6232	18.6164	17.3523		0.607902	-0.365402	0.571317	-1.98217	-1.0035	-0.709014	-0.271653	-3.43657	-1.57648	-1.35298	-0.130251	-0.655345
P21291	Cysteine and glycine-rich protein 1	CSRP1			nucleus	metal ion binding;RNA binding	1		MTF1 activates gene expression	Mecp2 and Associated Rett Syndrome		159232	151164	255058	52644.2	182166		183616		112941		76950.3	58136.5		17.2808	17.2058	17.9605	15.684	17.4749		17.4863		16.7852		16.2316	15.8272		-1.86559	-2.07778	-1.32592	-2.53631	-1.28178		-1.55787		-1.87133		-2.51499	-2.18052
Q96BK5	PIN2/TERF1-interacting telomerase inhibitor 1	PINX1		cell organization and biogenesis;metabolic process;regulation of biological process	chromosome;nucleus	enzyme regulator activity;protein binding;RNA binding	8					291531	264578	183080	95218.1	108234	123522	144139	72005	141442	183823	97514.1	78869.1		18.1533	18.0133	17.4821	16.5389	16.7238	16.9144	17.1371	16.1358	17.1098	17.488	16.5733	16.2672		-0.993072	-1.27021	-1.80427	-1.68135	-2.03288	-1.88629	-1.9071	-1.88441	-1.54669	-1.48825	-2.17331	-1.74051
Q7Z2K6	Endoplasmic reticulum metallopeptidase 1	ERMP1		metabolic process	endoplasmic reticulum;membrane	catalytic activity;metal ion binding	9					384201	757744	624699	102806	270518	264935	314846	21978.3	189996	142528	256725	45069.1		18.5515	19.5314	19.2528	16.6496	18.0454	18.0153	18.2643	14.4238	17.5356	17.1209	17.9699	15.4599		-0.594859	0.247811	-0.0335843	-1.57074	-0.711311	-0.785419	-0.779917	-3.59643	-1.12093	-1.85532	-0.776767	-2.54783
Q9Y2W6	Tudor and KH domain-containing protein	TDRKH		cell differentiation;cell organization and biogenesis;metabolic process;regulation of biological process	cytoplasm;mitochondrion	RNA binding	1		PIWI-interacting RNA (piRNA) biogenesis			206010	237374	179025			68285.5	153046		88842.6	150708	61586.2	26569.1		17.6524	17.8568	17.4498			16.0593	17.2236		16.439	17.2014	15.9103	14.6975		-1.49401	-1.42674	-1.83658			-2.7414	-1.8206		-2.21757	-1.77481	-2.83631	-3.31022
Q96N66	Lysophospholipid acyltransferase 7	MBOAT7		metabolic process	membrane	catalytic activity;protein binding	19; CHR_HSCHR19LRC_LRC_I_CTG3_1; CHR_HSCHR19LRC_LRC_J_CTG3_1; CHR_HSCHR19LRC_LRC_T_CTG3_1; CHR_HSCHR19LRC_LRC_S_CTG3_1; CHR_HSCHR19LRC_PGF2_CTG3_1; CHR_HSCHR19LRC_PGF1_CTG3_1; CHR_HSCHR19LRC_COX1_CTG3_1; CHR_HSCHR19LRC_COX2_CTG3_1; CHR_HSCHR19_4_CTG3_1	Glycerophospholipid metabolism	Acyl chain remodelling of PI			996399	1.01071e+06	967240	280242	431928	560795	559008	193106	495851	679883	462756	221610		19.9264	19.9469	19.8835	18.0963	18.7204	19.0971	19.0925	17.559	18.9195	19.3749	18.8199	17.7577		0.780001	0.663395	0.597129	-0.123985	-0.0362436	0.296419	0.048305	-0.461188	0.263009	0.398721	0.0732621	-0.250022
Q9H4G4	Golgi-associated plant pathogenesis-related protein 1	GLIPR2		regulation of biological process	extracellular;Golgi;membrane	protein binding	9					93439.1	180835	62449.4	91625.9			100552	71683	135928		158782	184033		16.5117	17.4643	15.9304	16.4835			16.6176	16.1293	17.0525		17.2767	17.4896		-2.63462	-1.81923	-3.35599	-1.73683			-2.42662	-1.89088	-1.60405		-1.46994	-0.518081
P62910	60S ribosomal protein L32	RPL32		cell organization and biogenesis;metabolic process;response to stimulus;transport	cytosol;membrane;ribosome	RNA binding;structural molecule activity	3	Ribosome	Peptide chain elongation; Eukaryotic Translation Termination; Viral mRNA Translation; L13a-mediated translational silencing of Ceruloplasmin expression; Nonsense Mediated Decay (NMD) independent of the Exon Junction Complex (EJC); Selenocysteine synthesis; Nonsense Mediated Decay (NMD) enhanced by the Exon Junction Complex (EJC); GTP hydrolysis and joining of the 60S ribosomal subunit; Major path…	Cytoplasmic Ribosomal Proteins		2.8055e+06	2.8466e+06	2.9963e+06	1.16722e+06	1.82313e+06	1.58711e+06	1.86801e+06	864867	2.0139e+06	2.04284e+06	1.59059e+06	970612		21.4198	21.4408	21.5148	20.1546	20.798	20.598	20.8331	19.7221	20.9416	20.9621	20.6011	19.8885		2.27346	2.15727	2.22836	1.93434	2.04131	1.79727	1.78887	1.7019	2.28502	1.98594	1.8545	1.88085
Q6PL18	ATPase family AAA domain-containing protein 2	ATAD2		cell organization and biogenesis;metabolic process;regulation of biological process	nucleus	catalytic activity;nucleotide binding;protein binding	8		TFAP2 (AP-2) family regulates transcription of growth factors and their receptors	Gastric cancer network 2		428778	570662	454684	248113	107022	271427	255810	231138	283509	293141	283455	302241		18.7099	19.1223	18.7945	17.9206	16.7075	18.0502	17.9647	17.8184	18.113	18.1612	18.1128	18.2053		-0.436492	-0.161262	-0.491883	-0.299662	-2.04913	-0.75049	-1.07949	-0.201825	-0.543506	-0.814969	-0.633872	0.197659
P61513	60S ribosomal protein L37a	RPL37A		cell organization and biogenesis;metabolic process;transport	cytosol;nucleus;ribosome	metal ion binding;protein binding;RNA binding;structural molecule activity	2	Ribosome	Peptide chain elongation; Eukaryotic Translation Termination; Viral mRNA Translation; L13a-mediated translational silencing of Ceruloplasmin expression; Nonsense Mediated Decay (NMD) independent of the Exon Junction Complex (EJC); Selenocysteine synthesis; Nonsense Mediated Decay (NMD) enhanced by the Exon Junction Complex (EJC); GTP hydrolysis and joining of the 60S ribosomal subunit; Major path…	Cytoplasmic Ribosomal Proteins		2.02033e+06	1.51385e+06	1.29059e+06	381410	673029	580173	844805	352767	638268	673033	738740	346104		20.9462	20.5298	20.2996	18.541	19.3603	19.1461	19.6883	18.4284	19.2838	19.3603	19.4947	18.4008		1.7998	1.24625	1.01321	0.320685	0.603634	0.345428	0.644053	0.408135	0.627263	0.384113	0.748076	0.393162
P46779	60S ribosomal protein L28	RPL28		cell organization and biogenesis;metabolic process;regulation of biological process;transport	cytosol;membrane;ribosome	protein binding;RNA binding;structural molecule activity	19	Ribosome	Peptide chain elongation; Eukaryotic Translation Termination; Viral mRNA Translation; L13a-mediated translational silencing of Ceruloplasmin expression; Nonsense Mediated Decay (NMD) independent of the Exon Junction Complex (EJC); Selenocysteine synthesis; Nonsense Mediated Decay (NMD) enhanced by the Exon Junction Complex (EJC); GTP hydrolysis and joining of the 60S ribosomal subunit; Major path…	Cytoplasmic Ribosomal Proteins		3.02426e+06	2.77919e+06	3.35004e+06	1.66499e+06	2.03634e+06	1.81739e+06	2.1528e+06	1.05631e+06	2.26379e+06	1.91001e+06	1.9271e+06	1.2477e+06		21.5281	21.4062	21.6757	20.6671	20.9575	20.7934	21.0378	20.0106	21.1103	20.8651	20.878	20.2508		2.38179	2.12269	2.38936	2.44678	2.20087	1.99274	1.99358	1.99038	2.45377	1.88894	2.13137	2.24316
Q6UXV4	MICOS complex subunit MIC27	APOOL		cell organization and biogenesis;transport	extracellular;membrane;mitochondrion;organelle lumen	protein binding	X		Platelet degranulation ; Cristae formation			458330	482125	478970	146090	210914	203820	326184	130442	153607	184950	193398	112499		18.806	18.879	18.8696	17.1565	17.6863	17.6369	18.3153	16.9931	17.2289	17.4968	17.5612	16.7795		-0.340337	-0.404492	-0.416811	-1.06381	-1.07038	-1.16376	-0.728876	-1.02717	-1.42765	-1.47943	-1.18542	-1.22813
P61020	Ras-related protein Rab-5B	RAB5B		cell organization and biogenesis;regulation of biological process;response to stimulus;transport	endosome;membrane	catalytic activity;nucleotide binding;protein binding	12	Endocytosis; Amoebiasis; Tuberculosis; Phagosome; Vasopressin-regulated water reabsorption; Ras signaling pathway	TBC/RABGAPs; Neutrophil degranulation; RAB GEFs exchange GTP for GDP on RABs; RAB geranylgeranylation; Clathrin-mediated endocytosis			181029	176825	250137	99081.8	126491	118335	138316	23814	110694	115275	109790	58967.8		17.4659	17.432	17.9324	16.5963	16.9487	16.8525	17.0776	14.5395	16.7562	16.8147	16.7444	15.8476		-1.6805	-1.85157	-1.35403	-1.62397	-1.808	-1.94818	-1.9666	-3.4807	-1.90032	-2.16148	-2.00225	-2.16004
Q92665	28S ribosomal protein S31, mitochondrial	MRPS31		cell organization and biogenesis;metabolic process	membrane;mitochondrion;ribosome	protein binding;RNA binding;structural molecule activity	13		Mitochondrial translation initiation; Mitochondrial translation elongation; Mitochondrial translation termination			103649	85381.7	280278	75252.8	65332.8	99685.6		50939.4	57988.6	79408.4	87689.9	35791.6		16.6613	16.3816	18.0965	16.1995	15.9955	16.6051		15.6365	15.8235	16.277	16.4201	15.1273		-2.48502	-2.9019	-1.18989	-2.02084	-2.76115	-2.1956		-2.38373	-2.83306	-2.6992	-2.32651	-2.88035
Q8TB72	Pumilio homolog 2	PUM2		cell organization and biogenesis;metabolic process;regulation of biological process;response to stimulus	cytoplasm;cytosol;membrane	protein binding;RNA binding	2		Neddylation			161167	217150	202545	57504.4	87140.9	86797.3	133618	44134	75981.5	82499.2	81156.6	49070.4		17.2982	17.7283	17.6279	15.8114	16.4111	16.4054	17.0278	15.4296	16.2134	16.3321	16.3084	15.5826		-1.84817	-1.55521	-1.6585	-2.40892	-2.34561	-2.39533	-2.01645	-2.59062	-2.44318	-2.64411	-2.43821	-2.42512
Q96K37	Solute carrier family 35 member E1	SLC35E1		transport	Golgi;membrane		19							117234	33808.4	23993.6											16.839	15.0451	14.5504											-2.44735	-3.17521	-4.20632
Q13740	CD166 antigen	ALCAM		cell growth;cellular component movement;regulation of biological process;response to stimulus	extracellular;membrane	protein binding	3	Cell adhesion molecules (CAMs)	L1CAM interactions			53883.3	310597	113318	19632.8	32694.3	42061.6	89331.1			54672.6	62793.9	12455.3		15.7176	18.2447	16.79	14.261	14.9967	15.3602	16.4469			15.7385	15.9383	13.6045		-3.42881	-1.03885	-2.49636	-3.95932	-3.75993	-3.44048	-2.59733			-3.23767	-2.80829	-4.40321
Q9NUL3	Double-stranded RNA-binding protein Staufen homolog 2											942878	1.07914e+06	1.22204e+06	285025	488176	538230	600999	221222	390513	392772	484868	201745		19.8467	20.0414	20.2209	18.1207	18.897	19.0379	19.197	17.7551	18.575	18.5833	18.8872	17.6222		0.700349	0.757909	0.93447	-0.0995685	0.140366	0.237168	0.152799	-0.26509	-0.0815282	-0.392874	0.140602	-0.38551
Q8TCJ2	Dolichyl-diphosphooligosaccharide--protein glycosyltransferase subunit STT3B	STT3B		metabolic process;response to stimulus	endoplasmic reticulum;membrane	catalytic activity;metal ion binding	3	N-Glycan biosynthesis; Protein processing in endoplasmic reticulum; Metabolic pathways				473939	447360	400877	41953.7	97244.4	161573	260102	30351	73200.5	150552	39791.8	18102.4		18.8543	18.7711	18.6128	15.3565	16.5693	17.3018	17.9887	14.8895	16.1596	17.1999	15.2802	14.1439		-0.29202	-0.512464	-0.673585	-2.86379	-2.18735	-1.49887	-1.05549	-3.13077	-2.49697	-1.77631	-3.46645	-3.86379
P61006	Ras-related protein Rab-8A	RAB8A		cell organization and biogenesis;metabolic process;regulation of biological process;response to stimulus;transport	cytoplasm;cytoskeleton;cytosol;endosome;Golgi;membrane	catalytic activity;nucleotide binding;protein binding	19	Endocytosis; Pancreatic secretion; AMPK signaling pathway	Translocation of GLUT4 to the plasma membrane; TBC/RABGAPs; VxPx cargo-targeting to cilium; Regulation of PLK1 Activity at G2/M Transition; Anchoring of the basal body to the plasma membrane; RAB GEFs exchange GTP for GDP on RABs; RAB geranylgeranylation	Focal Adhesion-PI3K-Akt-mTOR-signaling pathway		447863	378315	524746	195680	269012	267202	246207	145284	172180	205246	230026	117284		18.7727	18.5292	19.0013	17.5781	18.0373	18.0276	17.9095	17.1485	17.3936	17.647	17.8114	16.8396		-0.373664	-0.75431	-0.285127	-0.642166	-0.719367	-0.773123	-1.1347	-0.871702	-1.26298	-1.32921	-0.935193	-1.16804
P32119	Peroxiredoxin-2	PRDX2		cell communication;cellular homeostasis;metabolic process;regulation of biological process;response to stimulus	cytoplasm;cytosol;membrane	antioxidant activity;catalytic activity;protein binding	19		TP53 Regulates Metabolic Genes; Deregulated CDK5 triggers multiple neurodegenerative pathways in Alzheimer's disease models; Detoxification of Reactive Oxygen Species	Selenium Micronutrient Network		37884.1	35942.4		31269.6	25145.3					28726.3				15.2093	15.1334		14.9325	14.618					14.8101				-3.93706	-4.15014		-3.28783	-4.13867					-4.16612
P31641	Sodium- and chloride-dependent taurine transporter	SLC6A6		metabolic process;transport	membrane	transporter activity	3		Amino acid transport across the plasma membrane; Na+/Cl- dependent neurotransmitter transporters	NRF2 pathway		324794	290655	319526	87300.7	122040	157499	214173	64208.2	67974.9	117233	138407	47758.4		18.3092	18.1489	18.2856	16.4137	16.897	17.265	17.7084	15.9705	16.0527	16.839	17.0786	15.5435		-0.837196	-1.13459	-1.00081	-1.8066	-1.85968	-1.53571	-1.33579	-2.04975	-2.60383	-2.13719	-1.66807	-2.46422
Q15154	Pericentriolar material 1 protein											348650	550329	558749	186520	297893	289760	237396	105684	223126	363191	312803	149670		18.4114	19.0699	19.0918	17.509	18.1844	18.1445	17.8569	16.6894	17.7675	18.4704	18.2549	17.1914		-0.734943	-0.213605	-0.194547	-0.711331	-0.57224	-0.656199	-1.18727	-1.33082	-0.889043	-0.505837	-0.491736	-0.816257
Q9BSJ8	Extended synaptotagmin-1	ESYT1		metabolic process;transport	endoplasmic reticulum;membrane	metal ion binding;protein binding	12		Glycosphingolipid metabolism			171095	175820	183693	23194.6	51658.6	33587.8	65410.3	55727	61239.8	55841	59503.1	17019.7		17.3844	17.4237	17.4869	14.5015	15.6567	15.0357	15.9972	15.7661	15.9022	15.769	15.8607	14.0549		-1.76192	-1.8598	-1.79945	-3.7188	-3.09995	-3.76504	-3.04697	-2.25413	-2.75436	-3.20717	-2.88595	-3.95276
P02751	Fibronectin	FN1		cell differentiation;cell organization and biogenesis;cellular component movement;defense response;metabolic process;regulation of biological process;response to stimulus;transport	extracellular;membrane;organelle lumen	enzyme regulator activity;protein binding	2	Amoebiasis; Pathways in cancer; AGE-RAGE signaling pathway in diabetic complications; Focal adhesion; Proteoglycans in cancer; Regulation of actin cytoskeleton; Bacterial invasion of epithelial cells; Small cell lung cancer; ECM-receptor interaction; PI3K-Akt signaling pathway	Post-translational protein phosphorylation; Integrin cell surface interactions; Regulation of Insulin-like Growth Factor (IGF) transport and uptake by Insulin-like Growth Factor Binding Proteins (IGFBPs); Signaling by BRAF and RAF fusions; MET activates PTK2 signaling; MAP2K and MAPK activation; Molecules associated with elastic fibres; GRB2:SOS provides linkage to MAPK signaling for Integrins ; …	miRNA targets in ECM and membrane receptors; Focal Adhesion; Overview of nanoparticle effects; Rac1/Pak1/p38/MMP-2 pathway; TGF-beta Signaling Pathway; Simplified Interaction Map Between LOXL4 and Oxidative Stress Pathway; Association Between Physico-Chemical Features and Toxicity Associated Pathways; TGF-B Signaling in Thyroid Cells for Epithelial-Mesenchymal Transition; Focal Adhesion-PI3K-Akt-…		127811	300786	78456	24594.3	91221.2		125164		72263.5	88574.3	63631.5			16.9637	18.1984	16.2596	14.586	16.4771		16.9335		16.141	16.4346	15.9575			-2.18271	-1.08516	-3.02679	-3.63426	-2.27959		-2.11074		-2.51556	-2.5416	-2.78918
O43761	Synaptogyrin-3	SYNGR3		regulation of biological process;transport	membrane	protein binding	16					21068.9	39079.6	242037	12009							28495.5	14296.2		14.3628	15.2541	17.8849	13.5518							14.7984	13.8033		-4.78354	-4.02941	-1.40152	-4.66847							-3.94818	-4.20433
P55011	Solute carrier family 12 member 2	SLC12A2		cellular homeostasis;regulation of biological process;response to stimulus;transport	membrane	catalytic activity;nucleotide binding;protein binding;transporter activity	5	Pancreatic secretion; Salivary secretion; Vibrio cholerae infection	Cation-coupled Chloride cotransporters			1.03476e+06	3.92903e+06	1.97477e+06	221293	589106	615986	1.46508e+06	97262.8	581040	712911	1.20185e+06	147224		19.9809	21.9057	20.9133	17.7556	19.1682	19.2325	20.4825	16.5696	19.1483	19.4434	20.1968	17.1676		0.834497	2.6222	1.62687	-0.464699	0.411493	0.431841	1.43834	-1.45062	0.491738	0.467156	1.4502	-0.840034
Q9Y2C4	Nuclease EXOG, mitochondrial	EXOG		metabolic process	membrane;mitochondrion	catalytic activity;metal ion binding	3					148712	177534	185283	114891	92427.8	110307	120836	68425.9	88453.3	120199	95287.4	64813.2		17.1822	17.4377	17.4994	16.8099	16.496	16.7512	16.8827	16.0623	16.4326	16.8751	16.54	15.984		-1.9642	-1.8458	-1.78701	-1.41039	-2.26064	-2.04953	-2.16151	-1.95797	-2.22391	-2.10114	-2.20663	-2.02368
Q6P4A7	Sideroflexin-4	SFXN4		transport	membrane;mitochondrion	transporter activity	10					119545	65932.2	67318.5	41113.8	47654.4	61728.1	48675.8		27093	66367.4	18453.8	32129.8		16.8672	16.0087	16.0387	15.3273	15.5403	15.9136	15.5709		14.7256	16.0182	14.1716	14.9716		-2.27916	-3.27484	-3.24767	-2.89296	-3.21635	-2.88706	-3.47329		-3.93091	-2.95802	-4.575	-3.03606
Q92733	Proline-rich protein PRCC	PRCC		metabolic process;regulation of biological process	nucleus	protein binding	1	Transcriptional misregulation in cancer	mRNA Splicing - Major Pathway				144828	69566.5	31303.4		95752.9			87850.4	106000	84097.9	37663.3			17.144	16.0861	14.934		16.547			16.4228	16.6937	16.3598	15.2009			-2.13956	-3.20028	-3.28627		-2.25367			-2.23378	-2.2825	-2.38685	-2.80681
O15427	Monocarboxylate transporter 4	SLC16A3		cellular component movement;metabolic process;transport	membrane	protein binding;RNA binding;transporter activity	17	Central carbon metabolism in cancer	Proton-coupled monocarboxylate transport; Basigin interactions; Pyruvate metabolism			171940	298752	171653		97359.5	14953.5	158679		87514.7	64393.5	147550	51093.6		17.3915	18.1886	17.3891		16.571	13.8682	17.2757		16.4172	15.9746	17.1708	15.6409		-1.75482	-1.09495	-1.89725		-2.18564	-4.9325	-1.76846		-2.2393	-3.00158	-1.57578	-2.36683
Q00325	Phosphate carrier protein, mitochondrial	SLC25A3		transport	membrane;mitochondrion	protein binding;transporter activity	12					2.52965e+07	2.26787e+07	2.6023e+07	1.15159e+07	1.37894e+07	1.70144e+07	1.59373e+07	8.39005e+06	1.12847e+07	1.49969e+07	1.53528e+07	8.16695e+06		24.5924	24.4348	24.6333	23.4571	23.7171	24.0203	23.9259	23.0002	23.4279	23.8382	23.872	22.9614		5.44607	5.15129	5.3469	5.23682	4.96038	5.21955	4.8817	4.98003	4.77132	4.86196	5.12537	4.95368
Q9ULH0	Kinase D-interacting substrate of 220 kDa	KIDINS220		cell organization and biogenesis;regulation of biological process;response to stimulus	cytosol;endosome;membrane	enzyme regulator activity;protein binding	2	Neurotrophin signaling pathway	ARMS-mediated activation	Brain-Derived Neurotrophic Factor (BDNF) signaling pathway		230126	343647	341954	124624	146727	146812	264474	67993.8	235335	298291	312269	126617		17.8121	18.3906	18.3834	16.9272	17.1628	17.1636	18.0128	16.0531	17.8444	18.1864	18.2524	16.9501		-1.3343	-0.892972	-0.902944	-1.29308	-1.5939	-1.63708	-1.03144	-1.96711	-0.812182	-0.789844	-0.4942	-1.05757
Q9NWU5	39S ribosomal protein L22, mitochondrial	MRPL22		cell organization and biogenesis;metabolic process	membrane;mitochondrion;ribosome	RNA binding;structural molecule activity	5	Ribosome	Mitochondrial translation initiation; Mitochondrial translation elongation; Mitochondrial translation termination			478398	464327	519939	431974	435416	232184	275413	168954	195162	333458	284425	174353		18.8679	18.8248	18.988	18.7206	18.732	17.8249	18.0712	17.3663	17.5743	18.3471	18.1177	17.4117		-0.278511	-0.458758	-0.298404	0.500286	-0.0246419	-0.975789	-0.97297	-0.65395	-1.08223	-0.629061	-0.628941	-0.596029
Q9UPY5	Cystine/glutamate transporter	SLC7A11		cell differentiation;cellular component movement;response to stimulus;transport	cell surface;cytoskeleton;endoplasmic reticulum;membrane	protein binding;transporter activity	4		Basigin interactions; Amino acid transport across the plasma membrane	NRF2 pathway; Transcriptional activation by NRF2		620602	660086	955259	154191	244178	310116	471874	131599	532523	476293	673250	243924		19.2433	19.3323	19.8655	17.2344	17.8976	18.2424	18.848	17.0058	19.0225	18.8615	19.3608	17.8961		0.0969459	0.0487551	0.579146	-0.985937	-0.859101	-0.558248	-0.196163	-1.01444	0.365945	-0.114715	0.614152	-0.11161
P00846	ATP synthase subunit a	ATP6		cell organization and biogenesis;metabolic process;response to stimulus;transport	membrane;mitochondrion	catalytic activity;transporter activity	MT	Huntington's disease; Parkinson's disease; Alzheimer's disease; Oxidative phosphorylation; Metabolic pathways	Cristae formation; Formation of ATP by chemiosmotic coupling	Electron Transport Chain; Oxidative phosphorylation		1.33721e+06	1.85803e+06	1.8383e+06	289897	541712	645443	1.21683e+06	183981	555956	762887	732006	230366		20.3508	20.8253	20.8099	18.1452	19.0472	19.2999	20.2147	17.4892	19.0846	19.5411	19.4815	17.8136		1.20443	1.5418	1.52356	-0.0751212	0.290491	0.499234	1.17049	-0.531023	0.428073	0.564904	0.734865	-0.194113
P47914	60S ribosomal protein L29	RPL29		cell organization and biogenesis;metabolic process;transport	cytosol;membrane;ribosome	protein binding;RNA binding;structural molecule activity	3	Ribosome	Peptide chain elongation; Eukaryotic Translation Termination; Viral mRNA Translation; L13a-mediated translational silencing of Ceruloplasmin expression; Nonsense Mediated Decay (NMD) independent of the Exon Junction Complex (EJC); Selenocysteine synthesis; Nonsense Mediated Decay (NMD) enhanced by the Exon Junction Complex (EJC); GTP hydrolysis and joining of the 60S ribosomal subunit; Major path…	Cytoplasmic Ribosomal Proteins		2.60152e+06	2.9219e+06	2.29126e+06	989305	1.44138e+06	1.27521e+06	2.02937e+06	524172	1.25301e+06	1.39204e+06	1.09696e+06	586581		21.3109	21.4785	21.1277	19.9161	20.459	20.2823	20.9526	18.9997	20.257	20.4088	20.0651	19.162		2.16456	2.19494	1.84132	1.69576	1.70234	1.48161	1.9084	0.979458	1.60043	1.43256	1.31845	1.15429
Q8N357	Solute carrier family 35 member F6	C2orf18; SLC35F6		regulation of biological process;transport	cytosol;membrane;mitochondrion;vacuole	protein binding;transporter activity	2					1.59586e+06	364402	1.16887e+06	374290	572498	739909	332778	66158.4	220526	271287	612400	89932.5		20.6059	18.4752	20.1567	18.5138	19.1269	19.497	18.3442	16.0136	17.7506	18.0495	19.2241	16.4566		1.45954	-0.80837	0.870297	0.293496	0.370235	0.696293	-0.700005	-2.00658	-0.905948	-0.926746	0.477484	-1.55113
Q9NZM1	Myoferlin	MYOF		cell organization and biogenesis;regulation of biological process;response to stimulus	membrane;nucleus	protein binding	10			Aryl Hydrocarbon Receptor Pathway; Hepatitis C and Hepatocellular Carcinoma		2.01181e+06	914535	1.95064e+06	521255	560240	896470	831507	375258	295266	374304	429815	519191		20.9401	19.8027	20.8955	18.9916	19.0957	19.7739	19.6654	18.5175	18.1717	18.5139	18.7134	18.9859		1.7937	0.519139	1.60913	0.771329	0.33901	0.9732	0.621164	0.497302	-0.484883	-0.462354	-0.0332748	0.978222
Q3ZCQ8	Mitochondrial import inner membrane translocase subunit TIM50	TIMM50		cell organization and biogenesis;metabolic process;transport	membrane;mitochondrion;nucleus	catalytic activity;protein binding;RNA binding	19		Mitochondrial protein import; Metabolism of proteins			1.29735e+06	1.1359e+06	1.4285e+06	563188	717572	820642	928200	352533	733692	783526	653535	408398		20.3071	20.1154	20.4461	19.1033	19.4528	19.6464	19.8241	18.4274	19.4848	19.5796	19.3179	18.6396		1.16077	0.831859	1.15968	0.882956	0.696088	0.845698	0.779871	0.407179	0.828275	0.603417	0.571275	0.631933
P33176	Kinesin-1 heavy chain	KIF5B		cell differentiation;cell organization and biogenesis;cellular component movement;metabolic process;regulation of biological process;transport	cytoplasm;cytoskeleton;cytosol;membrane	catalytic activity;motor activity;nucleotide binding;protein binding	10	Dopaminergic synapse; Endocytosis	COPI-dependent Golgi-to-ER retrograde traffic; Kinesins; RHO GTPases activate KTN1; Insulin processing; MHC class II antigen presentation	Insulin Signaling		152226	165594	128904	49756.6	62897.8	118102	84763	16750.8	108742	239927	203607	100594		17.2159	17.3373	16.9759	15.6026	15.9407	16.8497	16.3711	14.0319	16.7306	17.8722	17.6354	16.6182		-1.93051	-1.94625	-2.31045	-2.6177	-2.81595	-1.95103	-2.67306	-3.98828	-1.92598	-1.10397	-1.1112	-1.3895
Q9NYK5	39S ribosomal protein L39, mitochondrial	MRPL39		cell organization and biogenesis;metabolic process	membrane;mitochondrion;ribosome	nucleotide binding;RNA binding	21		Mitochondrial translation initiation; Mitochondrial translation elongation; Mitochondrial translation termination			284868	307190	551175	170417	186768	280791	191091	84070.3	132867	189240	193651	87618.1		18.1199	18.2288	19.0722	17.3787	17.5109	18.0991	17.5439	16.3593	17.0196	17.5299	17.5631	16.4189		-1.02643	-1.05477	-0.214235	-0.841592	-1.24578	-0.701558	-1.50031	-1.66091	-1.63691	-1.44635	-1.18353	-1.58874
O75431	Metaxin-2	MTX2		transport	membrane;mitochondrion	protein binding	2		Cristae formation; Mitochondrial protein import; Metabolism of proteins			590096	514412	576737	375824	345795	330666	376630	228523	285026	364848	326407	162141		19.1706	18.9726	19.1376	18.5197	18.3996	18.335	18.5228	17.802	18.1207	18.4769	18.3163	17.3069		0.0242279	-0.310975	-0.148833	0.299398	-0.357117	-0.465679	-0.521416	-0.218239	-0.535805	-0.499269	-0.430319	-0.700794
Q96J84	Kin of IRRE-like protein 1	KIRREL; KIRREL1		cell organization and biogenesis;cellular component movement;regulation of biological process	membrane	protein binding	1		Nephrin family interactions; Reelin signalling pathway; Antigen activates B Cell Receptor (BCR) leading to generation of second messengers; CD28 dependent Vav1 pathway; NCAM signaling for neurite out-growth				121464	126449	46013.2	62310.1		69737.6		76210.2	89174.2	89021.2	55815.8			16.8902	16.9482	15.4898	15.9272		16.0896		16.2177	16.4443	16.4419	15.7684			-2.39337	-2.33818	-2.73054	-2.8295		-2.95456		-2.43884	-2.53187	-2.30477	-2.2393
P41208	Centrin-2	CETN2		cell division;cell organization and biogenesis;metabolic process;regulation of biological process;response to stimulus	cytoplasm;cytoskeleton;cytosol;nucleus	metal ion binding;protein binding	X	Nucleotide excision repair	Regulation of PLK1 Activity at G2/M Transition; AURKA Activation by TPX2; Anchoring of the basal body to the plasma membrane; Recruitment of NuMA to mitotic centrosomes; Recruitment of mitotic centrosome proteins and complexes; Loss of Nlp from mitotic centrosomes; Formation of Incision Complex in GG-NER; DNA Damage Recognition in GG-NER; SUMOylation of DNA damage response and repair proteins			427261	593002	510549	285321	387830	281115	272499	164126	145517	310373	248915	161773		18.7048	19.1777	18.9617	18.1222	18.5651	18.1008	18.0559	17.3244	17.1508	18.2436	17.9253	17.3036		-0.441605	-0.105863	-0.324695	-0.0980745	-0.191612	-0.699893	-0.988314	-0.695775	-1.50571	-0.732564	-0.821339	-0.704073
Q7Z7N9	Transmembrane protein 179B	TMEM179B		transport	membrane		11		Neutrophil degranulation			79986	72807.3	106234				82381.6			86163.6	38323.3	19553		16.2875	16.1518	16.6969				16.33			16.3948	15.2259	14.2551		-2.8589	-3.13174	-2.5895				-2.71417			-2.58141	-3.5207	-3.75258
P31040	Succinate dehydrogenase [ubiquinone] flavoprotein subunit, mitochondrial	SDHA		metabolic process;transport	membrane;mitochondrion	catalytic activity;nucleotide binding;protein binding	5	Citrate cycle (TCA cycle); Carbon metabolism; Huntington's disease; Parkinson's disease; Alzheimer's disease; Oxidative phosphorylation; Non-alcoholic fatty liver disease (NAFLD); Metabolic pathways	Respiratory electron transport; Citric acid cycle (TCA cycle)	Electron Transport Chain; TCA Cycle and Deficiency of Pyruvate Dehydrogenase complex (PDHc); Amino Acid metabolism; TCA Cycle		3.80278e+06	2.46268e+06	2.88148e+06	1.34793e+06	1.48572e+06	2.01317e+06	2.09885e+06	704729	1.05624e+06	1.46153e+06	1.29727e+06	684576		21.8586	21.2318	21.4584	20.3623	20.5027	20.941	21.0012	19.4267	20.0105	20.479	20.3071	19.3849		2.71226	1.94826	2.17199	2.14201	1.74605	2.14034	1.95697	1.40649	1.35397	1.50284	1.56042	1.37717
O00487	26S proteasome non-ATPase regulatory subunit 14	PSMD14		metabolic process;regulation of biological process;response to stimulus;transport	cytoplasm;cytosol;extracellular;nucleus;organelle lumen;proteasome	catalytic activity;enzyme regulator activity;metal ion binding;nucleotide binding;protein binding	2	Epstein-Barr virus infection; Proteasome	Regulation of RAS by GAPs; CDT1 association with the CDC6:ORC:origin complex; Downstream TCR signaling; UCH proteinases; NIK-->noncanonical NF-kB signaling; Hh mutants that don't undergo autocatalytic processing are degraded by ERAD; SCF-beta-TrCP mediated degradation of Emi1; Neutrophil degranulation; Cross-presentation of soluble exogenous antigens (endosomes); Separation of Sister Chromatids; …	Parkin-Ubiquitin Proteasomal System pathway		56135.7	65677.9	61828.6	44113.6	56783.4	48981.6					38403.1			15.7766	16.0031	15.916	15.4289	15.7932	15.58					15.2289			-3.36973	-3.28042	-3.3704	-2.79136	-2.96349	-3.22074					-3.5177
P07195	L-lactate dehydrogenase B chain	LDHB		metabolic process	cytoplasm;cytosol;membrane;mitochondrion	catalytic activity;nucleotide binding;protein binding	12	Propanoate metabolism; Pyruvate metabolism; Glucagon signaling pathway; Glycolysis / Gluconeogenesis; Metabolic pathways; Cysteine and methionine metabolism	Pyruvate metabolism	Glycolysis and Gluconeogenesis		3.29542e+06	4.00305e+06	3.4621e+06	1.72116e+06	2.37467e+06	2.26729e+06	2.5259e+06	1.12745e+06	2.13139e+06	2.71149e+06	2.35429e+06	1.24295e+06		21.652	21.9327	21.7232	20.7149	21.1793	21.1125	21.2684	20.1046	21.0234	21.3707	21.1669	20.2453		2.50567	2.64913	2.43683	2.49465	2.42262	2.31184	2.22416	2.08441	2.36682	2.39445	2.42023	2.23766
Q9UHB6	LIM domain and actin-binding protein 1	LIMA1		cell organization and biogenesis;regulation of biological process	cytoplasm;cytoskeleton	metal ion binding;protein binding	12					436789	239420	301923	115514	164146	175970	156774	87636.7	216203	293183	261321	137078		18.7366	17.8692	18.2038	16.8177	17.3246	17.425	17.2583	16.4192	17.722	18.1614	17.9955	17.0646		-0.409786	-1.41436	-1.08257	-1.40259	-1.43206	-1.37572	-1.78588	-1.60097	-0.934514	-0.814765	-0.751169	-0.943043
Q9NWW5	Ceroid-lipofuscinosis neuronal protein 6	CLN6		cell organization and biogenesis;cellular homeostasis;metabolic process;regulation of biological process	endoplasmic reticulum;membrane;organelle lumen	protein binding	15					259624	246351	285065	43424.9	80281.5	122025	159330	34047	121505	147856	132116	54572.4		17.9861	17.9104	18.1209	15.4062	16.2928	16.8968	17.2817	15.0552	16.8907	17.1738	17.0114	15.7359		-1.1603	-1.37318	-1.16546	-2.81407	-2.46389	-1.90388	-1.76255	-2.96498	-1.76588	-1.80237	-1.73519	-2.2718
P62857	40S ribosomal protein S28	RPS28		cell organization and biogenesis;metabolic process;transport	cytosol;ribosome	protein binding;RNA binding;structural molecule activity	19	Ribosome	Peptide chain elongation; Eukaryotic Translation Termination; Viral mRNA Translation; Formation of the ternary complex, and subsequently, the 43S complex; L13a-mediated translational silencing of Ceruloplasmin expression; Selenocysteine synthesis; Nonsense Mediated Decay (NMD) independent of the Exon Junction Complex (EJC); Nonsense Mediated Decay (NMD) enhanced by the Exon Junction Complex (EJC)…	Cytoplasmic Ribosomal Proteins		261851	147248	1.39623e+06	103499	192784	193234	70493.2	77501.3	52803.7	62553.5	114247	37087.1		17.9984	17.1679	20.4131	16.6593	17.5566	17.56	16.1052	16.2419	15.6884	15.9328	16.8018	15.1786		-1.14798	-2.11565	1.12672	-1.56104	-1.20005	-1.2407	-2.93901	-1.77829	-2.96819	-3.0434	-1.94483	-2.82905
O43674	NADH dehydrogenase [ubiquinone] 1 beta subcomplex subunit 5, mitochondrial	NDUFB5		cell organization and biogenesis;metabolic process;transport	membrane;mitochondrion	catalytic activity	3	Huntington's disease; Parkinson's disease; Alzheimer's disease; Oxidative phosphorylation; Non-alcoholic fatty liver disease (NAFLD); Metabolic pathways	Complex I biogenesis	Electron Transport Chain; Oxidative phosphorylation		610997	757281	266038	247531	154249	570811	139062	135223	80938.6	156724	200706	99799.9		19.2208	19.5305	18.0213	17.9173	17.2349	19.1227	17.0854	17.045	16.3045	17.2579	17.6147	16.6068		0.0744425	0.246929	-1.26511	-0.303048	-1.52177	0.321957	-1.95884	-0.975239	-2.352	-1.71833	-1.1319	-1.40093
P11233	Ras-related protein Ral-A	RALA		cell division;cell organization and biogenesis;regulation of biological process;response to stimulus;transport	cell surface;membrane	catalytic activity;nucleotide binding;protein binding	7	Pancreatic cancer; Phospholipase D signaling pathway; Rap1 signaling pathway; Pathways in cancer; Ras signaling pathway	Translocation of GLUT4 to the plasma membrane; Gene and protein expression by JAK-STAT signaling after Interleukin-12 stimulation; p38MAPK events; Interleukin-12 family signaling	RalA downstream regulated genes; EGF/EGFR Signaling Pathway		193786	68029.7	115730	48800.9	86948.2	58482.2	76659		38065.2	61343.2	63259.3	39834.8		17.5641	16.0539	16.8204	15.5746	16.4079	15.8357	16.2262		15.2162	15.9046	15.949	15.2817		-1.58226	-3.22966	-2.46599	-2.64568	-2.34881	-2.96499	-2.81804		-3.44035	-3.07159	-2.79764	-2.72594
Q13423	NAD(P) transhydrogenase, mitochondrial	NNT		metabolic process;transport	membrane;mitochondrion	catalytic activity;nucleotide binding;transporter activity	5	Nicotinate and nicotinamide metabolism; Metabolic pathways	Citric acid cycle (TCA cycle)			950844	1.42831e+06	1.12081e+06	765211	658913	740461	760537	459407	507198	618768	631720	459795		19.8588	20.4459	20.0961	19.5455	19.3297	19.4981	19.5367	18.8094	18.9522	19.239	19.2689	18.8106		0.712486	1.16234	0.809726	1.3252	0.573053	0.697368	0.492454	0.789192	0.29565	0.262833	0.522296	0.802948
P27635	60S ribosomal protein L10	RPL10		cell organization and biogenesis;metabolic process;regulation of biological process;transport	cytosol;endoplasmic reticulum;membrane;nucleus;ribosome	protein binding;RNA binding;structural molecule activity;translation regulator activity	X	Ribosome	Peptide chain elongation; Eukaryotic Translation Termination; Viral mRNA Translation; L13a-mediated translational silencing of Ceruloplasmin expression; Nonsense Mediated Decay (NMD) independent of the Exon Junction Complex (EJC); Selenocysteine synthesis; Nonsense Mediated Decay (NMD) enhanced by the Exon Junction Complex (EJC); GTP hydrolysis and joining of the 60S ribosomal subunit; Major path…	Cytoplasmic Ribosomal Proteins		1.94035e+06	2727015	1.77721e+06	748172	1.00443e+06	1.16945e+06	1.6104e+06	434028	1.14573e+06	1.22241e+06	967452	593038		20.8879	21.3789	20.7612	19.513	19.9379	20.1574	20.619	18.7274	20.1278	20.2213	19.8838	19.1778		1.74152	2.09535	1.4748	1.29271	1.18127	1.35671	1.57479	0.707206	1.4713	1.2451	1.1372	1.17008
P48047	ATP synthase subunit O, mitochondrial	ATP5O		cell organization and biogenesis;metabolic process;transport	membrane;mitochondrion;nucleus	catalytic activity;protein binding;transporter activity	21	Huntington's disease; Parkinson's disease; Alzheimer's disease; Oxidative phosphorylation; Metabolic pathways	Cristae formation; Formation of ATP by chemiosmotic coupling	Electron Transport Chain; Oxidative phosphorylation		2.17602e+06	2.154e+06	3.67367e+06	1.00302e+06	1.11568e+06	1.68217e+06	1.53307e+06	752626	949421	957836	1.40852e+06	474102		21.0533	21.0386	21.8088	19.9359	20.0895	20.6819	20.548	19.5216	19.8567	19.8694	20.4258	18.8548		1.9069	1.75505	2.52241	1.71562	1.33282	1.8812	1.50378	1.50135	1.20015	0.893214	1.67912	0.847156
O43819	Protein SCO2 homolog, mitochondrial	SCO2		cell organization and biogenesis;cellular homeostasis;metabolic process;regulation of biological process;transport	membrane;mitochondrion;organelle lumen	antioxidant activity;catalytic activity;metal ion binding;protein binding	22	Central carbon metabolism in cancer	TP53 Regulates Metabolic Genes; Respiratory electron transport	Copper homeostasis		224061	275155	188737	61573.6	63409.2	127061	166957	48389.1	92240.1	169320	123303	42861.4		17.7735	18.0699	17.526	15.91	15.9524	16.9552	17.3491	15.5624	16.4931	17.3694	16.9119	15.3874		-1.37283	-1.21366	-1.76037	-2.31028	-2.80427	-1.84553	-1.69509	-2.45783	-2.16343	-1.60681	-1.83478	-2.62029
Q16653	Myelin-oligodendrocyte glycoprotein	MOG			membrane	receptor activity	6					138395	55837.4	72486.8	43152.9	112156			24592.6	62074.7	35617.6	52947.2	46656.6		17.0784	15.7689	16.1454	15.3972	16.7752			14.5859	15.9217	15.1203	15.6923	15.5098		-2.06793	-3.5146	-3.14096	-2.82313	-1.98152			-3.43428	-2.73482	-3.8559	-3.05436	-2.49789
Q13045	Protein flightless-1 homolog	FLII		cell organization and biogenesis;development;metabolic process;regulation of biological process	cytoplasm;cytoskeleton;cytosol;nucleus	protein binding	17; CHR_HSCHR17_3_CTG1					124646	41014.8	171203	32832.6	63277.3		48277.2	27892.9	47536.2		47219.6	33966.4		16.9275	15.3239	17.3853	15.0028	15.9494		15.5591	14.7676	15.5367		15.5271	15.0518		-2.21889	-3.95968	-1.90104	-3.21746	-2.80727		-3.48515	-3.25261	-3.1198		-3.21953	-2.95586
Q96Q45	Transmembrane protein 237	TMEM237		cell organization and biogenesis;regulation of biological process	membrane	protein binding	2					237882	349862	223428	85497.9	157958	145050	126664	64996	194091	123729	157179	108198		17.8599	18.4164	17.7695	16.3836	17.2692	17.1462	16.9506	15.9881	17.5664	16.9168	17.262	16.7233		-1.28647	-0.867112	-1.51693	-1.8367	-1.48749	-1.65451	-2.09356	-2.03216	-1.09017	-2.05938	-1.48458	-1.28437
O75947	ATP synthase subunit d, mitochondrial	ATP5H		cell organization and biogenesis;metabolic process;transport	cytosol;membrane;mitochondrion	catalytic activity;transporter activity	17	Huntington's disease; Parkinson's disease; Alzheimer's disease; Oxidative phosphorylation; Metabolic pathways	Cristae formation; Formation of ATP by chemiosmotic coupling	Electron Transport Chain; Oxidative phosphorylation		330572	409931	700184	243688	249502	328736	289038	114057	91563.7	176880	297249	132881		18.3346	18.645	19.4174	17.8947	17.9287	18.3266	18.1409	16.7994	16.4825	17.4324	18.1813	17.0198		-0.811759	-0.638519	0.130988	-0.325626	-0.827983	-0.474124	-0.903306	-1.22083	-2.17405	-1.54379	-0.565319	-0.987905
Q5RI15	Cytochrome c oxidase assembly protein COX20, mitochondrial	COX20		cell organization and biogenesis;metabolic process	membrane;mitochondrion		1		TP53 Regulates Metabolic Genes; Respiratory electron transport			1.53873e+06	1.58285e+06	1.51647e+06	516304	604608	1.01314e+06	1.10841e+06	330210	765533	976964	573634	474619		20.5533	20.5941	20.5323	18.9779	19.2056	19.9504	20.0801	18.333	19.5461	19.8979	19.1298	18.8564		1.40695	1.31055	1.2459	0.757563	0.448965	1.14971	1.03585	0.312802	0.889566	0.921741	0.383141	0.848727
Q86WX3	Active regulator of SIRT1	RPS19BP1			cytosol;nucleus;ribosome	protein binding;RNA binding	22		Regulation of HSF1-mediated heat shock response			490782	439933	353807	202267	270613	371390	410261		336886	498062	334947	163728		18.9047	18.7469	18.4326	17.6259	18.0459	18.5026	18.6462		18.3619	18.926	18.3536	17.3209		-0.24164	-0.536615	-0.853783	-0.594402	-0.710805	-0.298121	-0.398021		-0.294637	-0.0502408	-0.393058	-0.686741
Q8N766	ER membrane protein complex subunit 1	EMC1		metabolic process	endoplasmic reticulum;membrane		1					3.44827e+06	4.0436e+06	4.60056e+06	1.68682e+06	2.36793e+06	1.84865e+06	2.89985e+06	1.46869e+06	2.53562e+06	2.9047e+06	2.39262e+06	1.55411e+06		21.7174	21.9472	22.1334	20.6859	21.1752	20.818	21.4675	20.4861	21.2739	21.47	21.1902	20.5677		2.57108	2.66367	2.84699	2.46557	2.41852	2.01734	2.42334	2.46587	2.61737	2.49375	2.44353	2.55998
Q16555	Dihydropyrimidinase-related protein 2	DPYSL2		cell differentiation;cell organization and biogenesis;cellular component movement;development;metabolic process;regulation of biological process;response to stimulus;transport	cytoplasm;cytoskeleton;cytosol;membrane	catalytic activity;protein binding	8	Axon guidance	Recycling pathway of L1; CRMPs in Sema3A signaling	Regulation of Microtubule Cytoskeleton; Brain-Derived Neurotrophic Factor (BDNF) signaling pathway		139772	112191	128745	109240	65823.2	56811	82558.8	72573.7	60044	45298.9	48703.5	38325.9		17.0927	16.7756	16.9742	16.7371	16.0063	15.7939	16.3331	16.1472	15.8737	15.4672	15.5717	15.226		-2.05365	-2.50794	-2.31223	-1.48316	-2.75037	-3.00681	-2.71107	-1.87306	-2.78281	-3.50902	-3.17489	-2.78165
Q9Y3D3	28S ribosomal protein S16, mitochondrial	MRPS16		cell organization and biogenesis;metabolic process	cytosol;membrane;mitochondrion;ribosome	protein binding;structural molecule activity	10	Ribosome	Mitochondrial translation initiation; Mitochondrial translation elongation; Mitochondrial translation termination			148036	144189	169845	23966.4	54261.5	78734.6	108576		51295.7	108686	68214.2	34243.2		17.1756	17.1376	17.3739	14.5487	15.7276	16.2647	16.7283		15.6466	16.7298	16.0578	15.0635		-1.97077	-2.14593	-1.91253	-3.67158	-3.02903	-2.53598	-2.31586		-3.00999	-2.2464	-2.68885	-2.94415
Q9BXP5	Serrate RNA effector molecule homolog	SRRT		cell proliferation;metabolic process;regulation of biological process;response to stimulus	cytoplasm;nucleus	DNA binding;protein binding;RNA binding	7		RNA polymerase II transcribes snRNA genes; mRNA Splicing - Major Pathway			237192	445721	218895	159811	188944	154582	204586	73103.2	173977	181565	204550	94280.9		17.8557	18.7658	17.7399	17.286	17.5276	17.238	17.6424	16.1576	17.4085	17.4701	17.6421	16.5247		-1.29067	-0.517757	-1.54651	-0.934296	-1.22907	-1.56269	-1.40185	-1.86258	-1.248	-1.50608	-1.10454	-1.483
P82930	28S ribosomal protein S34, mitochondrial	MRPS34		cell organization and biogenesis;metabolic process	membrane;mitochondrion;ribosome	structural molecule activity	16		Mitochondrial translation initiation; Mitochondrial translation elongation; Mitochondrial translation termination			248732	233384	223432	124394	129034	189125	160300	43498.3	35694.1	133468	110642	42142.9		17.9242	17.8323	17.7695	16.9246	16.9774	17.529	17.2904	15.4087	15.1234	17.0261	16.7555	15.363		-1.22213	-1.45119	-1.51691	-1.29574	-1.77928	-1.27171	-1.75379	-2.61155	-3.53314	-1.95007	-1.99109	-2.64468
P00414	Cytochrome c oxidase subunit 3	COX3		cell organization and biogenesis;metabolic process;transport	membrane;mitochondrion	catalytic activity;protein binding;transporter activity	MT	Huntington's disease; Parkinson's disease; Alzheimer's disease; Oxidative phosphorylation; Non-alcoholic fatty liver disease (NAFLD); Metabolic pathways; Cardiac muscle contraction	TP53 Regulates Metabolic Genes; Respiratory electron transport	Electron Transport Chain		2.00484e+06	1.77431e+06	1.36314e+06	513803	657957	925085	1.21868e+06	388698	809918	1.10062e+06	778827	562940		20.9351	20.7588	20.3785	18.9709	19.3276	19.8192	20.2169	18.5683	19.6274	20.0699	19.5709	19.1026		1.78869	1.47528	1.09212	0.750555	0.570958	1.01853	1.17268	0.548067	0.970877	1.09367	0.824312	1.09494
P51970	NADH dehydrogenase [ubiquinone] 1 alpha subcomplex subunit 8	NDUFA8		cell organization and biogenesis;metabolic process;transport	membrane;mitochondrion	catalytic activity;protein binding	9	Huntington's disease; Parkinson's disease; Alzheimer's disease; Oxidative phosphorylation; Non-alcoholic fatty liver disease (NAFLD); Metabolic pathways	Complex I biogenesis	Electron Transport Chain; Oxidative phosphorylation		1.73407e+06	2.7696e+06	2.26808e+06	1.09533e+06	1.29751e+06	1.44863e+06	1.45609e+06	763434	946136	1.5975e+06	1.56082e+06	715344		20.7257	21.4012	21.113	20.0629	20.3073	20.4663	20.4737	19.5421	19.8517	20.6074	20.5739	19.4483		1.57937	2.1177	1.82665	1.84263	1.55064	1.66556	1.42946	1.52192	1.19515	1.63118	1.82724	1.44059
P31644	Gamma-aminobutyric acid receptor subunit alpha-5	GABRA5		cell communication;defense response;regulation of biological process;response to stimulus;transport	membrane	protein binding;receptor activity;signal transducer activity;transporter activity	15	Neuroactive ligand-receptor interaction; Morphine addiction; Taste transduction; Retrograde endocannabinoid signaling; GABAergic synapse; Nicotine addiction	GABA A receptor activation				105113	98562.5	29492.6	40011.5		71145								16.6816	16.5888	14.8481	15.2881		16.1185								-2.60196	-2.69764	-3.37223	-3.46855		-2.92573
P28290	Protein ITPRID2	SSFA2			cytoplasm;cytosol;membrane;nucleus	protein binding	2					490261	432735	678130	220166	276650	364725	343632	128717	156276	337464	184545	171151		18.9032	18.7231	19.3712	17.7482	18.0777	18.4764	18.3905	16.9738	17.2537	18.3644	17.4936	17.3849		-0.243173	-0.560414	0.0848166	-0.472065	-0.678972	-0.324248	-0.653698	-1.04638	-1.4028	-0.611833	-1.25302	-0.622768
Q96ER9	Coiled-coil domain-containing protein 51	CCDC51			membrane;mitochondrion		3					286290	223593	218087	121675	125848	174529	182842	57390	109224	153206	83555	48761.1		18.1271	17.7705	17.7345	16.8927	16.9413	17.4131	17.4802	15.8085	16.7369	17.2251	16.3504	15.5734		-1.01924	-1.51302	-1.55184	-1.32763	-1.81536	-1.38759	-1.56397	-2.21171	-1.91962	-1.75109	-2.39619	-2.43424
P52926	High mobility group protein HMGI-C	HMGA2		cell communication;cell differentiation;cell division;cell organization and biogenesis;cell proliferation;development;metabolic process;regulation of biological process;response to stimulus	chromosome;nucleus	catalytic activity;DNA binding;protein binding	12	MicroRNAs in cancer; Transcriptional misregulation in cancer	Formation of Senescence-Associated Heterochromatin Foci (SAHF)	Mesodermal Commitment Pathway		71660.6	237839	71899.5			54284.1	64307.1		47408.9	113437	40788.2	31788.6		16.1289	17.8596	16.1337			15.7282	15.9727		15.5329	16.7915	15.3159	14.9562		-3.01747	-1.42391	-3.15269			-3.07245	-3.07151		-3.12367	-2.18467	-3.43077	-3.05146
Q96A35	39S ribosomal protein L24, mitochondrial	MRPL24		cell organization and biogenesis;metabolic process	membrane;mitochondrion;ribosome	structural molecule activity	1	Ribosome	Mitochondrial translation initiation; Mitochondrial translation elongation; Mitochondrial translation termination			141005	97548.5	183888	25529.3	29651.2	97012.9	87573.7	15587.8	41326.7	90472.1	57250.5	36931.9		17.1054	16.5738	17.4885	14.6399	14.8558	16.5659	16.4182	13.9281	15.3348	16.4652	15.805	15.1726		-2.04098	-2.70971	-1.79792	-3.58043	-3.90087	-2.23481	-2.62599	-4.09209	-3.32175	-2.51102	-2.94163	-2.8351
Q9HCE1	Helicase MOV-10	MOV10		metabolic process;regulation of biological process;response to stimulus	cytoplasm;cytosol	catalytic activity;nucleotide binding;protein binding;RNA binding	1		RUNX1 regulates genes involved in megakaryocyte differentiation and platelet function; Ca2+ pathway; Competing endogenous RNAs (ceRNAs) regulate PTEN translation; Regulation of RUNX1 Expression and Activity; MAPK6/MAPK4 signaling; TP53 Regulates Metabolic Genes; Oncogene Induced Senescence; Pre-NOTCH Transcription and Translation; Oxidative Stress Induced Senescence			135532	264288	229162	69515.7	112579	118262	124812	39464.3	112582	151479	131701	105961		17.0483	18.0118	17.806	16.0851	16.7806	16.8516	16.9294	15.2683	16.7806	17.2088	17.0069	16.6932		-2.09809	-1.27179	-1.48038	-2.13525	-1.9761	-1.94907	-2.11481	-2.75196	-1.87592	-1.76745	-1.73972	-1.31451
P16402	Histone H1.3	HIST1H1D		cell organization and biogenesis;metabolic process;regulation of biological process	chromosome;nucleus	DNA binding;RNA binding	6		Formation of Senescence-Associated Heterochromatin Foci (SAHF); Activation of DNA fragmentation factor			9.10993e+06	7.37142e+06	6.52557e+06	4.89326e+06	4.76149e+06	5.47254e+06	4.9901e+06	2.4061e+06	5.2745e+06	6.11906e+06	4.56638e+06	3.05467e+06		23.119	22.8135	22.6377	22.2224	22.183	22.3838	22.2506	21.1983	22.3306	22.5449	22.1226	21.5426		3.97265	3.52997	3.35129	4.00206	3.42631	3.58308	3.20643	3.17804	3.67406	3.56867	3.37599	3.5349
O00410	Importin-5	IPO5		regulation of biological process;response to stimulus;transport	cytoplasm;membrane;nucleus	enzyme regulator activity;protein binding;RNA binding;transporter activity	13		vRNP Assembly			103220	166322	102633	53974.7	63191.1	60880.6	88580.4	42171.1	36922.7	53965.6	38874.5	42626.9		16.6554	17.3436	16.6471	15.72	15.9474	15.8937	16.4347	15.364	15.1722	15.7198	15.2465	15.3795		-2.49101	-1.93992	-2.63925	-2.50031	-2.80924	-2.907	-2.60951	-2.65626	-3.48432	-3.25645	-3.5001	-2.62821
Q96QD9	UAP56-interacting factor	FYTTD1		transport	nucleus	protein binding;RNA binding	3		Cleavage of Growing Transcript in the Termination Region ; Transport of Mature mRNA derived from an Intron-Containing Transcript; mRNA 3'-end processing			220352	345376	247542	112186	193090	178334	165313	23696.7	187234	257013	117839	57020.7		17.7494	18.3978	17.9173	16.7755	17.5589	17.4442	17.3348	14.5324	17.5145	17.9715	16.8465	15.7992		-1.39691	-0.88573	-1.36907	-1.44477	-1.19776	-1.35647	-1.70937	-3.48782	-1.14205	-1.00473	-1.90018	-2.20849
Q9UQ90	Paraplegin	SPG7		cell organization and biogenesis;cellular component movement;metabolic process;response to stimulus;transport	membrane;mitochondrion	catalytic activity;metal ion binding;nucleotide binding;protein binding	16		Processing of SMDT1			265204	240572	317959	149175	207274		258533	109946	132610	392554	173665			18.0167	17.8761	18.2785	17.1866	17.6612		17.98	16.7464	17.0168	18.5825	17.4059			-1.12962	-1.40743	-1.0079	-1.03365	-1.0955		-1.06422	-1.27379	-1.63971	-0.393674	-1.34069
O43166	Signal-induced proliferation-associated 1-like protein 1	SIPA1L1		cell organization and biogenesis;regulation of biological process;response to stimulus	cytoplasm;cytoskeleton;membrane	enzyme regulator activity;protein binding	14	Rap1 signaling pathway	Neurexins and neuroligins			63976.2		36810	31657.5	13812.6	35890.6						17523.6		15.9652		15.1678	14.9503	13.7537	15.1313						14.097		-3.18111		-4.11858	-3.27004	-5.00298	-3.66938						-3.91067
P62829	60S ribosomal protein L23	RPL23		cell organization and biogenesis;metabolic process;regulation of biological process;response to stimulus;transport	cytoplasm;cytosol;membrane;ribosome	protein binding;RNA binding;structural molecule activity	17	Ribosome	Peptide chain elongation; Eukaryotic Translation Termination; Viral mRNA Translation; L13a-mediated translational silencing of Ceruloplasmin expression; Nonsense Mediated Decay (NMD) independent of the Exon Junction Complex (EJC); Selenocysteine synthesis; Nonsense Mediated Decay (NMD) enhanced by the Exon Junction Complex (EJC); GTP hydrolysis and joining of the 60S ribosomal subunit; Major path…	Cytoplasmic Ribosomal Proteins		1.47732e+07	8.682e+06	2.9143e+06	3.29879e+06	3414882	2.98474e+06	4.25794e+06	1.89229e+06	3.25676e+06	4.66265e+06	3.13139e+06	1.87154e+06		23.8165	23.0496	21.4747	21.6535	21.7034	21.5092	22.0217	20.8517	21.635	22.1527	21.5784	20.8358		4.67012	3.76606	2.18833	3.43321	2.94673	2.70848	2.97752	2.83148	2.97847	3.17651	2.83174	2.82811
P67812	Signal peptidase complex catalytic subunit SEC11A	SEC11A		metabolic process	endoplasmic reticulum;membrane	catalytic activity	15	Protein export	Synthesis, secretion, and inactivation of Glucagon-like Peptide-1 (GLP-1); Synthesis, secretion, and deacylation of Ghrelin; SRP-dependent cotranslational protein targeting to membrane; Synthesis, secretion, and inactivation of Glucose-dependent Insulinotropic Polypeptide (GIP)			667150	822099	883975	143531	402491	428134	405193	62944.8	372081	416810	397343	99465.4		19.3477	19.649	19.7536	17.131	18.6186	18.7077	18.6282	15.9418	18.5053	18.669	18.6	16.6019		0.201288	0.365412	0.46726	-1.0893	-0.138077	-0.0929932	-0.415955	-2.07842	-0.151283	-0.307174	-0.146607	-1.40577
P35221	Catenin alpha-1	CTNNA1		cell organization and biogenesis;regulation of biological process;response to stimulus	cytoplasm;cytoskeleton;cytosol;Golgi;membrane	protein binding;RNA binding;structural molecule activity	5	Arrhythmogenic right ventricular cardiomyopathy (ARVC); Tight junction; Hippo signaling pathway; Endometrial cancer; Pathways in cancer; Adherens junction; Leukocyte transendothelial migration; Bacterial invasion of epithelial cells	Adherens junctions interactions; CDO in myogenesis; VEGFR2 mediated vascular permeability; RHO GTPases activate IQGAPs	Arrhythmogenic Right Ventricular Cardiomyopathy; Apoptosis-related network due to altered Notch3 in ovarian cancer; VEGFA-VEGFR2 Signaling Pathway; White fat cell differentiation		1.04137e+06	937502	1.50778e+06	562679	662444	720457	672613	410835	584225	711407	805661	420915		19.9901	19.8385	20.524	19.102	19.3374	19.4586	19.3594	18.6482	19.1562	19.4403	19.6198	18.6832		0.843688	0.554922	1.23761	0.881653	0.580764	0.657857	0.315212	0.627978	0.499625	0.464109	0.873182	0.675486
P98194	Calcium-transporting ATPase type 2C member 1	ATP2C1		cell organization and biogenesis;cellular homeostasis;regulation of biological process;response to stimulus;transport	Golgi;membrane	catalytic activity;metal ion binding;nucleotide binding;signal transducer activity;transporter activity	3		Ion transport by P-type ATPases			256210	372233	118548	60248.3	130356	154471	144913		48392.2	75536	139090	19808.4		17.967	18.5058	16.8551	15.8786	16.9921	17.237	17.1448		15.5625	16.2049	17.0857	14.2738		-1.1794	-0.777695	-2.43128	-2.34167	-1.76458	-1.56372	-1.89938		-3.09405	-2.77133	-1.66097	-3.73386
P16403	Histone H1.2	HIST1H1C		cell organization and biogenesis;metabolic process;regulation of biological process	chromosome;nucleus	DNA binding;protein binding;RNA binding	6		Formation of Senescence-Associated Heterochromatin Foci (SAHF); Activation of DNA fragmentation factor			1.04142e+07	9.91855e+06	9.93313e+06	5.86929e+06	6.75863e+06	7.4306e+06	6.39301e+06	3.2437e+06	6.57822e+06	8.45964e+06	6.17452e+06	3.95674e+06		23.3121	23.2417	23.2438	22.4848	22.6883	22.825	22.6081	21.6292	22.6493	23.0122	22.5579	21.9159		4.16569	3.95816	3.95743	4.26446	3.93162	4.02435	3.56386	3.60899	3.99273	4.03596	3.81127	3.9082
P46777	60S ribosomal protein L5	RPL5		cell organization and biogenesis;metabolic process;regulation of biological process;transport	cytoplasm;cytosol;membrane;nucleus;ribosome	protein binding;RNA binding;structural molecule activity	1	Ribosome	Peptide chain elongation; Eukaryotic Translation Termination; Viral mRNA Translation; L13a-mediated translational silencing of Ceruloplasmin expression; Nonsense Mediated Decay (NMD) independent of the Exon Junction Complex (EJC); Selenocysteine synthesis; Nonsense Mediated Decay (NMD) enhanced by the Exon Junction Complex (EJC); GTP hydrolysis and joining of the 60S ribosomal subunit; Major path…	Cytoplasmic Ribosomal Proteins		2.88896e+06	2.68018e+06	2.30317e+06	1.00241e+06	1.36117e+06	1.42294e+06	2.12135e+06	657314	1.94773e+06	1.91988e+06	1.29084e+06	837490		21.4621	21.3539	21.1352	19.935	20.3764	20.4404	21.0166	19.3262	20.8934	20.8726	20.2999	19.6757		2.31575	2.07036	1.8488	1.71475	1.61974	1.63974	1.97235	1.306	2.23682	1.89638	1.55325	1.66803
P62487	DNA-directed RNA polymerase II subunit RPB7	POLR2G		cell death;metabolic process;regulation of biological process;response to stimulus	nucleus	catalytic activity;DNA binding;protein binding;RNA binding	11	Epstein-Barr virus infection; Huntington's disease; Purine metabolism; RNA polymerase; Metabolic pathways; Pyrimidine metabolism	Signaling by FGFR2 IIIa TM; RNA polymerase II transcribes snRNA genes; Abortive elongation of HIV-1 transcript in the absence of Tat; Tat-mediated HIV elongation arrest and recovery; Activation of anterior HOX genes in hindbrain development during early embryogenesis; Formation of HIV-1 elongation complex containing HIV-1 Tat; MicroRNA (miRNA) biogenesis; Formation of the HIV-1 Early Elongation C…	Eukaryotic Transcription Initiation		355825	444979	363485	173993	251879	214384	294781	128217	376292	415194	316291	181377		18.4408	18.7634	18.4715	17.4087	17.9424	17.7098	18.1693	16.9682	18.5215	18.6634	18.2709	17.4686		-0.705555	-0.520163	-0.814849	-0.811626	-0.814304	-1.09086	-0.874919	-1.05199	-0.135048	-0.312779	-0.475737	-0.539053
P61009	Signal peptidase complex subunit 3	SPCS3		metabolic process;transport	endoplasmic reticulum;membrane	catalytic activity	4	Protein export	Synthesis, secretion, and inactivation of Glucagon-like Peptide-1 (GLP-1); Synthesis, secretion, and deacylation of Ghrelin; SRP-dependent cotranslational protein targeting to membrane; Synthesis, secretion, and inactivation of Glucose-dependent Insulinotropic Polypeptide (GIP)			817178	841130	824486	159803	381132	424863	427916	115464	319580	395927	377290	128197		19.6403	19.682	19.6531	17.2859	18.5399	18.6966	18.707	16.8171	18.2858	18.5949	18.5253	16.968		0.493928	0.39843	0.36675	-0.934367	-0.216745	-0.104058	-0.337237	-1.20314	-0.37072	-0.381332	-0.221316	-1.03968
P46977	Dolichyl-diphosphooligosaccharide--protein glycosyltransferase subunit STT3A	STT3A		metabolic process	endoplasmic reticulum;membrane	catalytic activity;metal ion binding;protein binding	11	N-Glycan biosynthesis; Protein processing in endoplasmic reticulum; Metabolic pathways	Asparagine N-linked glycosylation			176122	215256	209315	40162.4	97419.4	126863	137088	8256.21	56612.5	67252.6	111493	5779.99		17.4262	17.7157	17.6753	15.2936	16.5719	16.9529	17.0647	13.0113	15.7888	16.0373	16.7666	12.4969		-1.72015	-1.56785	-1.61107	-2.92674	-2.18475	-1.84778	-1.97946	-5.00896	-2.86771	-2.9389	-1.98003	-5.51083
P50895	Basal cell adhesion molecule	BCAM		regulation of biological process;response to stimulus	cell surface;extracellular;membrane	protein binding;receptor activity;signal transducer activity	19					87097.3	123688	101900	15903.2	46769.1	48050.2	50335.3	11100	30107.8	62182.4	65668.8	22545.2		16.4103	16.9163	16.6368	13.957	15.5133	15.5523	15.6193	13.4383	14.8778	15.9242	16.0029	14.4605		-2.73602	-2.36719	-2.6496	-4.26327	-3.24341	-3.24844	-3.42492	-4.58195	-3.77869	-3.05199	-2.74371	-3.54715
P63010	AP-2 complex subunit beta	AP2B1		cell organization and biogenesis;cellular component movement;metabolic process;regulation of biological process;response to stimulus;transport	cytosol;membrane	protein binding;transporter activity	17	Endocytosis; Huntington's disease; Endocrine and other factor-regulated calcium reabsorption; Synaptic vesicle cycle	Cargo recognition for clathrin-mediated endocytosis; Nef Mediated CD8 Down-regulation; Nef Mediated CD4 Down-regulation; Trafficking of GluR2-containing AMPA receptors; Recycling pathway of L1; LDL clearance; EPH-ephrin mediated repulsion of cells; Retrograde neurotrophin signalling; VLDLR internalisation and degradation; WNT5A-dependent internalization of FZD2, FZD5 and ROR2; MHC class II antige…	Synaptic Vesicle Pathway; EGF/EGFR Signaling Pathway		638644	712393	763862	358462	476731	479078	532246	262506	495779	422827	497104	280063		19.2847	19.4423	19.543	18.4515	18.8628	18.8699	19.0217	18.002	18.9193	18.6897	18.9232	18.0954		0.13829	0.158775	0.256566	0.231161	0.10614	0.0692041	-0.02247	-0.0182305	0.2628	-0.286499	0.176557	0.0877113
P11166	Solute carrier family 2, facilitated glucose transporter member 1	SLC2A1		cell communication;cell organization and biogenesis;metabolic process;regulation of biological process;response to stimulus;transport	cytoplasm;cytoskeleton;cytosol;membrane;nucleus	protein binding;transporter activity	1	HIF-1 signaling pathway; Central carbon metabolism in cancer; Bile secretion; Pathways in cancer; Thyroid hormone signaling pathway; Insulin secretion; Renal cell carcinoma; Glucagon signaling pathway; HTLV-I infection; Insulin resistance; Adipocytokine signaling pathway	Lactose synthesis; Defective SLC2A1 causes GLUT1 deficiency syndrome 1 (GLUT1DS1); Cellular hexose transport; Regulation of insulin secretion; Vitamin C (ascorbate) metabolism	Cori Cycle; NRF2 pathway; Photodynamic therapy-induced HIF-1 survival signaling; Angiopoietin Like Protein 8 Regulatory Pathway; Focal Adhesion-PI3K-Akt-mTOR-signaling pathway; Insulin Signaling; Glycolysis and Gluconeogenesis		2.06061e+06	2.00939e+06	2.55174e+06	978444	1.02256e+06	1.0869e+06	2.30029e+06	451644	1.34708e+06	1.54586e+06	1.80414e+06	704524		20.9746	20.9383	21.2831	19.9001	19.9638	20.0518	21.1334	18.7848	20.3614	20.56	20.7829	19.4263		1.82828	1.65478	1.99666	1.67983	1.20708	1.25109	2.08918	0.764605	1.70487	1.58377	2.03625	1.41861
P47755	F-actin-capping protein subunit alpha-2	CAPZA2		cell organization and biogenesis;cellular component movement;coagulation;defense response;regulation of biological process;response to stimulus;transport	cytoskeleton;cytosol;extracellular;membrane	protein binding	7	Endocytosis	COPI-independent Golgi-to-ER retrograde traffic; Advanced glycosylation endproduct receptor signaling; COPI-mediated anterograde transport; MHC class II antigen presentation; HSP90 chaperone cycle for steroid hormone receptors (SHR); Factors involved in megakaryocyte development and platelet production			176551	566819	808261	474731	548191	146616	291676	93172.2	212529	292732	438861	199541		17.4297	19.1125	19.6245	18.8568	19.0643	17.1617	18.154	16.5076	17.6973	18.1592	18.7434	17.6063		-1.71664	-0.171011	0.338076	0.636451	0.307644	-1.63902	-0.890198	-1.51261	-0.95924	-0.816985	-0.00322552	-0.401356
P61927	60S ribosomal protein L37	RPL37		cell organization and biogenesis;metabolic process;transport	cytosol;ribosome	metal ion binding;RNA binding;structural molecule activity	5	Ribosome	Peptide chain elongation; Eukaryotic Translation Termination; Viral mRNA Translation; L13a-mediated translational silencing of Ceruloplasmin expression; Nonsense Mediated Decay (NMD) independent of the Exon Junction Complex (EJC); Selenocysteine synthesis; Nonsense Mediated Decay (NMD) enhanced by the Exon Junction Complex (EJC); GTP hydrolysis and joining of the 60S ribosomal subunit; Major path…	Cytoplasmic Ribosomal Proteins		592923	472430	596774	295746	300783	401051	432663	153036	495115	515706	378250	256497		19.1775	18.8497	19.1868	18.174	18.1984	18.6134	18.7229	17.2235	18.9174	18.9762	18.529	17.9686		0.0311234	-0.4338	-0.099562	-0.0462996	-0.558312	-0.187269	-0.321321	-0.796715	0.260866	-1.67084e-05	-0.21765	-0.0391003
Q03135	Caveolin-1	CAV1		cell communication;cell differentiation;cell organization and biogenesis;cellular component movement;cellular homeostasis;metabolic process;regulation of biological process;response to stimulus;transport	endoplasmic reticulum;endosome;Golgi;membrane	enzyme regulator activity;protein binding;structural molecule activity	7	Endocytosis; Focal adhesion; Proteoglycans in cancer; Bacterial invasion of epithelial cells; Viral myocarditis	Triglyceride catabolism; Basigin interactions; eNOS activation; NOSTRIN mediated eNOS trafficking; Disassembly of the destruction complex and recruitment of AXIN to the membrane; VEGFR2 mediated vascular permeability	Androgen receptor signaling pathway; Integrin-mediated Cell Adhesion; Focal Adhesion; TGF-beta Signaling Pathway; VEGFA-VEGFR2 Signaling Pathway; EGF/EGFR Signaling Pathway		2.78216e+06	2.60543e+06	2.2773e+06	1.33688e+06	1161351	1.62502e+06	1.95935e+06	1.01724e+06	1.85125e+06	2.51451e+06	1.65199e+06	1.24227e+06		21.4078	21.3131	21.1189	20.3504	20.1474	20.632	20.9019	19.9562	20.8201	21.2618	20.6558	20.2446		2.26141	2.02955	1.8325	2.13014	1.3907	1.83133	1.85774	1.93601	2.16353	2.28564	1.90914	2.23687
P36542	ATP synthase subunit gamma, mitochondrial	ATP5C1		cell organization and biogenesis;metabolic process;transport	membrane;mitochondrion;organelle lumen	catalytic activity;RNA binding;transporter activity	10	Huntington's disease; Parkinson's disease; Alzheimer's disease; Oxidative phosphorylation; Metabolic pathways	Cristae formation; Formation of ATP by chemiosmotic coupling	Electron Transport Chain		9.08664e+06	7.77779e+06	8.44801e+06	3.02863e+06	4.65597e+06	4.33519e+06	5.68803e+06	2.62998e+06	4.92849e+06	4.77452e+06	5.04886e+06	2.35843e+06		23.1153	22.8909	23.0102	21.5302	22.1507	22.0477	22.4395	21.3266	22.2327	22.1869	22.2675	21.1694		3.96895	3.60739	3.72379	3.30993	3.39397	3.24697	3.39529	3.3064	3.57617	3.21072	3.5209	3.16171
Q9Y3B9	RRP15-like protein	RRP15		metabolic process			1					2.61096e+06	3.46485e+06	2.76283e+06	1.20453e+06	1.71499e+06	1.54307e+06	2.24761e+06	965292	2.00097e+06	2.65547e+06	1.77578e+06	1.11291e+06		21.3161	21.7244	21.3977	20.2	20.7098	20.5574	21.1	19.8806	20.9323	21.3405	20.76	20.0859		2.16979	2.44082	2.11133	1.97974	1.9531	1.75668	2.05575	1.86038	2.27573	2.36433	2.01339	2.07822
Q8IY37	Probable ATP-dependent RNA helicase DHX37	DHX37		metabolic process	cytoplasm	catalytic activity;nucleotide binding;RNA binding	12		Major pathway of rRNA processing in the nucleolus and cytosol; rRNA modification in the nucleus and cytosol			322032	274123	274183	86266.8	184408	197236	120120	46811.7	180517	278804	361095	64664		18.2968	18.0645	18.0648	16.3965	17.4925	17.5896	16.8741	15.5146	17.4618	18.0889	18.462	15.9807		-0.849517	-1.21908	-1.22161	-1.82378	-1.26413	-1.21114	-2.17008	-2.50564	-1.19476	-0.887316	-0.28461	-2.02701
Q15375	Ephrin type-A receptor 7	EPHA7		cell death;cellular component movement;development;metabolic process;regulation of biological process;response to stimulus	membrane	catalytic activity;nucleotide binding;protein binding;receptor activity;signal transducer activity	6	Axon guidance	EPH-ephrin mediated repulsion of cells; EPHA-mediated growth cone collapse			210714	229662	250807	96178.2	114234	127906	197304	74329.7	114239	162216	147258	71935.4		17.6849	17.8092	17.9362	16.5534	16.8016	16.9647	17.5901	16.1817	16.8017	17.3076	17.168	16.1344		-1.46144	-1.47439	-1.35017	-1.66688	-1.95504	-1.83597	-1.45415	-1.83857	-1.85484	-1.66865	-1.57864	-1.87327
O75477	Erlin-1											1.29333e+06	1.62991e+06	1.53958e+06	626120	849633	1.05865e+06	966646	421499	633804	849468	738884	409311		20.3027	20.6364	20.5541	19.2561	19.6965	20.0138	19.8826	18.6852	19.2737	19.6962	19.495	18.6428		1.1563	1.35282	1.26772	1.03578	0.939805	1.2131	0.838424	0.664946	0.617139	0.719995	0.748358	0.635154
Q15397	Pumilio homolog 3	KIAA0020; PUM3		regulation of biological process	chromosome;endoplasmic reticulum;nucleus	DNA binding;protein binding;RNA binding	9					1.27988e+06	798594	1.50566e+06	867945	642472	735297	912718	377788	3.53093e+06	1.10347e+06	624527	571232		20.2876	19.6071	20.522	19.7272	19.2933	19.488	19.7998	18.5272	21.7516	20.0736	19.2524	19.1237		1.14121	0.323562	1.23558	1.50694	0.5366	0.687272	0.755604	0.506995	3.09508	1.09741	0.505774	1.11603
P37198	Nuclear pore glycoprotein p62	NUP62		cell death;cell organization and biogenesis;metabolic process;regulation of biological process;response to stimulus;transport	cytoplasm;cytoskeleton;membrane;nucleus	protein binding;structural molecule activity;transporter activity	19	RNA transport	Rev-mediated nuclear export of HIV RNA; ISG15 antiviral mechanism; NEP/NS2 Interacts with the Cellular Export Machinery; tRNA processing in the nucleus; Transcriptional regulation by small RNAs; Nuclear Pore Complex (NPC) Disassembly; Regulation of Glucokinase by Glucokinase Regulatory Protein; Vpr-mediated nuclear import of PICs; Regulation of HSF1-mediated heat shock response; snRNP Assembly; S…			184288	272236	319997	174768	181004	166842	170723	78960	149229	169285	219037	83051.1		17.4916	18.0545	18.2877	17.4151	17.4657	17.3481	17.3813	16.2688	17.1872	17.3691	17.7408	16.3417		-1.65476	-1.22904	-0.998685	-0.805217	-1.29101	-1.45257	-1.6629	-1.75139	-1.46937	-1.60711	-1.00582	-1.66597
Q96H55	Unconventional myosin-XIX	MYO19		regulation of biological process	cytoplasm;cytoskeleton;membrane;mitochondrion	catalytic activity;motor activity;nucleotide binding;protein binding	17; CHR_HSCHR17_7_CTG4					413247	654977	541004	185650	256955	261913	463692	113500	272011	524030	303414	160240		18.6566	19.3211	19.0453	17.5022	17.9712	17.9987	18.8228	16.7923	18.0533	18.9993	18.2109	17.2899		-0.489718	0.0375452	-0.241106	-0.718072	-0.78552	-0.80197	-0.221399	-1.2279	-0.603234	0.0230834	-0.535701	-0.717808
O75319	RNA/RNP complex-1-interacting phosphatase											497566	499215	527730	246868	341603	308983	371419	200465	353475	361581	265290	181644		18.9245	18.9293	19.0094	17.9134	18.382	18.2372	18.5027	17.613	18.4312	18.464	18.0172	17.4708		-0.221835	-0.354239	-0.276947	-0.306917	-0.374713	-0.563529	-0.541517	-0.407232	-0.225292	-0.512246	-0.729418	-0.536932
O96005	Cleft lip and palate transmembrane protein 1	CLPTM1		cell differentiation;development;regulation of biological process	membrane	protein binding	19					114325	213512	250521			83459.7	167465		17318.7	59658.7	21665.9			16.8028	17.704	17.9346			16.3488	17.3535		14.08	15.8644	14.4031			-2.34358	-1.57958	-1.35181			-2.4519	-1.69071		-4.5765	-3.11176	-4.34349
P63220	40S ribosomal protein S21	RPS21		cell organization and biogenesis;metabolic process;transport	cytosol;ribosome	protein binding;RNA binding;structural molecule activity	20	Ribosome	Peptide chain elongation; Eukaryotic Translation Termination; Viral mRNA Translation; Formation of the ternary complex, and subsequently, the 43S complex; L13a-mediated translational silencing of Ceruloplasmin expression; Selenocysteine synthesis; Nonsense Mediated Decay (NMD) independent of the Exon Junction Complex (EJC); Nonsense Mediated Decay (NMD) enhanced by the Exon Junction Complex (EJC)…	Cytoplasmic Ribosomal Proteins		1.0596e+06	792475	834984	86328.7	176639	121225	377542	394453	367817	99270	403577	82435.9		20.0151	19.596	19.6714	16.3976	17.4304	16.8873	18.5263	18.5895	18.4886	16.5991	18.6225	16.331		0.868723	0.312467	0.385002	-1.82275	-1.32623	-1.91336	-0.517928	0.569273	-0.167913	-2.37713	-0.124145	-1.6767
Q9P2K5	Myelin expression factor 2	MYEF2		cell differentiation;metabolic process;regulation of biological process	nucleus	DNA binding;protein binding;RNA binding	15			Physiological and Pathological Hypertrophy of the Heart; MicroRNAs in cardiomyocyte hypertrophy; TFs Regulate miRNAs related to cardiac hypertrophy; Mitochondrial Gene Expression		489046	1.04673e+06	517644	209051	332074	270394	612384	91488.4	208316	501089	217650	88656.1		18.8996	19.9975	18.9816	17.6735	18.3411	18.0447	19.2241	16.4813	17.6684	18.9347	17.7317	16.4359		-0.246752	0.713918	-0.304786	-0.546803	-0.41553	-0.75599	0.179872	-1.53892	-0.988123	-0.0414979	-1.01498	-1.57175
O75251	NADH dehydrogenase [ubiquinone] iron-sulfur protein 7, mitochondrial	NDUFS7		cell organization and biogenesis;metabolic process;transport	membrane;mitochondrion;organelle lumen	catalytic activity;metal ion binding;protein binding	19	Huntington's disease; Parkinson's disease; Alzheimer's disease; Oxidative phosphorylation; Non-alcoholic fatty liver disease (NAFLD); Metabolic pathways	Complex I biogenesis	Electron Transport Chain; Oxidative phosphorylation		1.1751e+06	1.65185e+06	1.57791e+06	981742	823244	1.00242e+06	951078	640941	606342	1.11361e+06	1.01101e+06	563582		20.1644	20.6557	20.5896	19.905	19.651	19.9351	19.8592	19.2898	19.2098	20.0868	19.9474	19.1043		1.01799	1.37211	1.3032	1.68468	0.894285	1.13436	0.815	1.26961	0.553233	1.1106	1.20073	1.09658
Q9NX20	39S ribosomal protein L16, mitochondrial	MRPL16		cell organization and biogenesis;metabolic process	membrane;mitochondrion;ribosome	RNA binding;structural molecule activity	11	Ribosome	Mitochondrial translation initiation; Mitochondrial translation elongation; Mitochondrial translation termination			315482	306939	387855	139563	153273	193779	208938	143850	223759	296549	284272	121500		18.2672	18.2276	18.5652	17.0906	17.2257	17.5641	17.6727	17.1342	17.7716	18.1779	18.1169	16.8906		-0.879164	-1.05595	-0.721229	-1.12974	-1.53093	-1.23664	-1.37149	-0.886012	-0.884955	-0.798296	-0.629716	-1.11709
P13861	cAMP-dependent protein kinase type II-alpha regulatory subunit	PRKAR2A		coagulation;metabolic process;regulation of biological process;response to stimulus	cytoplasm;cytosol;membrane	catalytic activity;enzyme regulator activity;nucleotide binding;protein binding	3	Insulin signaling pathway	DARPP-32 events; ROBO receptors bind AKAP5; Glucagon-like Peptide-1 (GLP1) regulates insulin secretion; Hedgehog 'off' state; Vasopressin regulates renal water homeostasis via Aquaporins; Factors involved in megakaryocyte development and platelet production; Signaling by GPCR; PKA activation in glucagon signalling; PKA activation	miRs in Muscle Cell Differentiation; Myometrial Relaxation and Contraction Pathways; G Protein Signaling Pathways; TGF-beta Signaling Pathway; Calcium Regulation in the Cardiac Cell; Sudden Infant Death Syndrome (SIDS) Susceptibility Pathways		551954	438668	235101	134604	177933	169167	235495	121404	156485	190065	167156	107912		19.0742	18.7428	17.8429	17.0384	17.441	17.3681	17.8453	16.8895	17.2557	17.5361	17.3508	16.7195		-0.0721744	-0.540769	-1.44346	-1.18194	-1.3157	-1.43261	-1.19887	-1.13076	-1.40088	-1.44008	-1.39579	-1.28819
P05026	Sodium/potassium-transporting ATPase subunit beta-1	ATP1B1		cell communication;cell organization and biogenesis;cellular component movement;cellular homeostasis;metabolic process;regulation of biological process;response to stimulus;transport	membrane	catalytic activity;enzyme regulator activity;metal ion binding;nucleotide binding;protein binding;transporter activity	1	Bile secretion; cGMP-PKG signaling pathway; Endocrine and other factor-regulated calcium reabsorption; Protein digestion and absorption; Proximal tubule bicarbonate reclamation; Thyroid hormone signaling pathway; Insulin secretion; Adrenergic signaling in cardiomyocytes; Thyroid hormone synthesis; Pancreatic secretion; Aldosterone-regulated sodium reabsorption; Carbohydrate digestion and absorpti…	Ion homeostasis; Basigin interactions; Ion transport by P-type ATPases	Calcium Regulation in the Cardiac Cell		1.12e+06	662991	592882	231626	484803	256577	566215	148661	318758	374219	381538	144453		20.0951	19.3386	19.1774	17.8214	18.887	17.969	19.111	17.1817	18.2821	18.5135	18.5415	17.1402		0.948703	0.0550904	-0.109001	-0.398862	0.130364	-0.831663	0.066786	-0.83856	-0.374436	-0.462682	-0.205163	-0.86744
Q16563	Synaptophysin-like protein 1	SYPL1		cell communication;transport	membrane	transporter activity	7					416197	516769	685007	112591	240153	228602	454492	52649.6	246529	330892	340236	81110.6		18.6669	18.9792	19.3858	16.7807	17.8736	17.8025	18.7939	15.6841	17.9114	18.336	18.3762	16.3076		-0.479455	-0.30438	0.0993738	-1.43956	-0.883079	-0.998218	-0.250311	-2.33609	-0.74514	-0.640204	-0.370453	-1.70008
Q8TBC3	SH3KBP1-binding protein 1	SHKBP1		cell organization and biogenesis;regulation of biological process	vacuole	protein binding	19						156113	108489				84818.7			122299	101083				17.2522	16.7272				16.3721			16.9001	16.6252				-2.03131	-2.5592				-2.67211			-2.07615	-2.12145
P61247	40S ribosomal protein S3a	RPS3A		cell differentiation;cell organization and biogenesis;metabolic process;regulation of biological process;transport	cytoplasm;cytosol;endoplasmic reticulum;nucleus;ribosome	protein binding;RNA binding;structural molecule activity	4	Ribosome	Peptide chain elongation; Eukaryotic Translation Termination; Viral mRNA Translation; Formation of the ternary complex, and subsequently, the 43S complex; L13a-mediated translational silencing of Ceruloplasmin expression; Selenocysteine synthesis; Nonsense Mediated Decay (NMD) independent of the Exon Junction Complex (EJC); Nonsense Mediated Decay (NMD) enhanced by the Exon Junction Complex (EJC)…	Cytoplasmic Ribosomal Proteins		5.54295e+06	5.36867e+06	6.1592e+06	2.70154e+06	4.05663e+06	3.26945e+06	3.32671e+06	2.07619e+06	2.1563e+06	2.30747e+06	2.31479e+06	1.33371e+06		22.4022	22.3561	22.5543	21.3654	21.9519	21.6406	21.6657	20.9855	21.0401	21.1379	21.1424	20.347		3.25586	3.07259	3.26792	3.14505	3.19518	2.83992	2.62146	2.96528	2.38359	2.16167	2.39582	2.33933
P52294	Importin subunit alpha-5	KPNA1		metabolic process;regulation of biological process;transport	cytoplasm;cytosol;nucleus	protein binding;transporter activity	3	Influenza A	Integration of provirus; ISG15 antiviral mechanism; NS1 Mediated Effects on Host Pathways; Vpr-mediated nuclear import of PICs; Transport of Ribonucleoproteins into the Host Nucleus; Activation of DNA fragmentation factor			365428	271110	256779	94267.6	208900	171022	187936	28664.7	119105	239613	228859	39697.4		18.4792	18.0485	17.9702	16.5245	17.6725	17.3838	17.5199	14.807	16.8619	17.8703	17.8041	15.2768		-0.667134	-1.23502	-1.31622	-1.69583	-1.08422	-1.41687	-1.52432	-3.21323	-1.79467	-1.10586	-0.942532	-2.73093
Q969M3	Protein YIPF5	YIPF5		regulation of biological process;transport	endoplasmic reticulum;Golgi;membrane	catalytic activity;protein binding	5					744184	552139	707414	85579.4	294921	308994	347776	52387.4	177657	250180	274524			19.5053	19.0747	19.4322	16.385	18.17	18.2372	18.4078	15.6769	17.4387	17.9326	18.0666			0.358937	-0.208868	0.14581	-1.83532	-0.586707	-0.563479	-0.636407	-2.34329	-1.21781	-1.0436	-0.680058
Q6NZI2	Caveolae-associated protein 1	PTRF; CAVIN1		metabolic process;regulation of biological process	cytoplasm;cytosol;endoplasmic reticulum;membrane;mitochondrion;nucleus	protein binding;RNA binding	17		RNA Polymerase I Transcription Termination			3222232	2.17987e+06	2.41503e+06	1.34204e+06	1.38449e+06	1.12728e+06	1.98285e+06	1.10535e+06	1.73138e+06	1.74967e+06	1.44889e+06	1.10317e+06		21.6196	21.0558	21.2036	20.356	20.4009	20.1044	20.9191	20.0761	20.7235	20.7387	20.4665	20.0732		2.47327	1.77227	1.91722	2.13569	1.64425	1.30371	1.87494	2.05584	2.06695	1.76245	1.71989	2.06554
P09001	39S ribosomal protein L3, mitochondrial	MRPL3		cell organization and biogenesis;metabolic process	membrane;mitochondrion;ribosome	catalytic activity;RNA binding;structural molecule activity	3	Ribosome	Mitochondrial translation initiation; Mitochondrial translation elongation; Mitochondrial translation termination			446203	414890	574783	300870	309976	326078	305214	183704	250077	357400	270594	203669		18.7673	18.6624	19.1327	18.1988	18.2418	18.3149	18.2195	17.487	17.932	18.4472	18.0458	17.6359		-0.379021	-0.621171	-0.153729	-0.0215192	-0.514879	-0.485837	-0.824744	-0.533197	-0.724528	-0.529024	-0.70086	-0.371812
O95139	NADH dehydrogenase [ubiquinone] 1 beta subcomplex subunit 6	NDUFB6		cell organization and biogenesis;metabolic process;transport	membrane;mitochondrion	catalytic activity	9	Huntington's disease; Parkinson's disease; Alzheimer's disease; Oxidative phosphorylation; Non-alcoholic fatty liver disease (NAFLD); Metabolic pathways	Complex I biogenesis	Electron Transport Chain; Oxidative phosphorylation		623635	721690	737919	305628	363534	469152	508906	260702	62829.8	518302	530500	224045		19.2503	19.461	19.4931	18.2214	18.4717	18.8397	18.957	17.992	15.9392	18.9834	19.017	17.7734		0.10398	0.177481	0.206718	0.00111926	-0.284943	0.0390004	-0.0871655	-0.028179	-2.71738	0.00722675	0.270362	-0.234252
P49821	NADH dehydrogenase [ubiquinone] flavoprotein 1, mitochondrial	NDUFV1		cell organization and biogenesis;metabolic process;transport	cytosol;membrane;mitochondrion	catalytic activity;metal ion binding;nucleotide binding	11	Huntington's disease; Parkinson's disease; Alzheimer's disease; Oxidative phosphorylation; Non-alcoholic fatty liver disease (NAFLD); Metabolic pathways	Complex I biogenesis	Electron Transport Chain; Oxidative phosphorylation		1.50535e+06	1.80729e+06	1.53291e+06	1.10639e+06	964198	1.02009e+06	1.28693e+06	660842	734470	1.08222e+06	860162	616500		20.5217	20.7854	20.5478	20.0774	19.879	19.9603	20.2955	19.3339	19.4863	20.0456	19.7142	19.2337		1.3753	1.50186	1.26145	1.85712	1.12229	1.15957	1.25129	1.31372	0.829804	1.06936	0.967617	1.22606
P55060	Exportin-2	CSE1L		cell death;cell proliferation;transport	cytoplasm;cytosol;membrane;nucleus	protein binding;transporter activity	20					111590	150042	84037.4	100085	83641.8	72412	75354.3	38314.6	41379.8	62853.7	185480	63753.7		16.7678	17.195	16.3587	16.6109	16.3519	16.1439	16.2014	15.2256	15.3366	15.9397	17.5009	15.9602		-2.37852	-2.08854	-2.92764	-1.60944	-2.40474	-2.65675	-2.8428	-2.79462	-3.3199	-3.03649	-1.24573	-2.04746
Q13405	39S ribosomal protein L49, mitochondrial	MRPL49		cell organization and biogenesis;metabolic process	membrane;mitochondrion;ribosome	protein binding;structural molecule activity	11		Mitochondrial translation initiation; Mitochondrial translation elongation; Mitochondrial translation termination				316811	200054	64781.9	62541.9	106814	71038.1		102850	208111	122695				18.2733	17.61	15.9833	15.9325	16.7047	16.1163		16.6502	17.667	16.9047				-1.01028	-1.67635	-2.237	-2.82414	-2.09595	-2.9279		-2.00635	-1.30921	-1.84192
P47985	Cytochrome b-c1 complex subunit Rieske, mitochondrial	UQCRFS1		metabolic process;response to stimulus;transport	membrane;mitochondrion	catalytic activity;metal ion binding;protein binding;transporter activity	19	Huntington's disease; Parkinson's disease; Alzheimer's disease; Oxidative phosphorylation; Non-alcoholic fatty liver disease (NAFLD); Metabolic pathways; Cardiac muscle contraction	Respiratory electron transport	Electron Transport Chain		3.82162e+06	4.46447e+06	4.3914e+06	2.39228e+06	2.40572e+06	2.8512e+06	2.72271e+06	1.87349e+06	1.98843e+06	2.99606e+06	2.28865e+06	1.75824e+06		21.8658	22.0901	22.0662	21.19	21.198	21.4431	21.3766	20.8373	20.9232	21.5146	21.1261	20.7457		2.71939	2.80652	2.77986	2.96965	2.44136	2.64244	2.33241	2.81708	2.26666	2.53843	2.37944	2.73802
Q9P0J0	NADH dehydrogenase [ubiquinone] 1 alpha subcomplex subunit 13	NDUFA13		cell death;cell organization and biogenesis;metabolic process;regulation of biological process;response to stimulus;transport	cytoplasm;membrane;mitochondrion;nucleus	catalytic activity;nucleotide binding;protein binding	19	Huntington's disease; Parkinson's disease; Alzheimer's disease; Oxidative phosphorylation; Non-alcoholic fatty liver disease (NAFLD); Metabolic pathways	Complex I biogenesis	Nucleotide-binding Oligomerization Domain (NOD) pathway; EGF/EGFR Signaling Pathway		1.08713e+06	1.36281e+06	1.18427e+06	710868	547736	725867	821049	600193	672240	944899	694085	591858		20.0521	20.3782	20.1756	19.4392	19.0631	19.4693	19.6471	19.1951	19.3586	19.8498	19.4048	19.1749		0.905734	1.09462	0.889178	1.21892	0.306446	0.668651	0.602904	1.17484	0.702077	0.873596	0.658122	1.16721
O15504	Nucleoporin NUP42	NUPL2		cell organization and biogenesis;metabolic process;regulation of biological process;transport	cytosol;membrane;nucleus	metal ion binding;protein binding;RNA binding;transporter activity	7	RNA transport	Rev-mediated nuclear export of HIV RNA; ISG15 antiviral mechanism; NEP/NS2 Interacts with the Cellular Export Machinery; tRNA processing in the nucleus; Transcriptional regulation by small RNAs; Nuclear Pore Complex (NPC) Disassembly; Regulation of Glucokinase by Glucokinase Regulatory Protein; Vpr-mediated nuclear import of PICs; Regulation of HSF1-mediated heat shock response; snRNP Assembly; S…			398163	446910	410376	132224	231930	229072	274523	109103	345891	343826	281082	135939		18.603	18.7696	18.6466	17.0126	17.8233	17.8054	18.0666	16.7353	18.4	18.3913	18.1006	17.0526		-0.543362	-0.513914	-0.639801	-1.20767	-0.933346	-0.995255	-0.977637	-1.28489	-0.256582	-0.584887	-0.645998	-0.955086
O75964	ATP synthase subunit g, mitochondrial	ATP5L		cell organization and biogenesis;metabolic process;transport	membrane;mitochondrion	catalytic activity;transporter activity	11	Oxidative phosphorylation; Metabolic pathways	Cristae formation; Formation of ATP by chemiosmotic coupling	Electron Transport Chain; Oxidative phosphorylation		1.43197e+06	2.15501e+06	1.93783e+06	380194	709401	853581	1.40661e+06	267680	682167	774330	863368	281543		20.4496	21.0393	20.886	18.5364	19.4362	19.7032	20.4238	18.0301	19.3798	19.5626	19.7196	18.103		1.30321	1.75573	1.59962	0.316076	0.679567	0.902473	1.37958	0.0099277	0.723227	0.586384	0.972985	0.0953123
Q9Y3B7	39S ribosomal protein L11, mitochondrial	MRPL11		cell organization and biogenesis;metabolic process	membrane;mitochondrion;ribosome	protein binding;RNA binding;structural molecule activity	11	Ribosome	Mitochondrial translation initiation; Mitochondrial translation elongation; Mitochondrial translation termination			163261	141647	286117	223967	76280.3	220094	168775	44574.1	100491	146882	69719.1	43003.1		17.3168	17.1119	18.1262	17.7729	16.219	17.7478	17.3647	15.4439	16.6167	17.1643	16.0893	15.3922		-1.82955	-2.1716	-1.16014	-0.447375	-2.53765	-1.05294	-1.67947	-2.5763	-2.03983	-1.81191	-2.65737	-2.61553
Q9BYC9	39S ribosomal protein L20, mitochondrial	MRPL20		cell organization and biogenesis;metabolic process	membrane;mitochondrion;ribosome	protein binding;RNA binding;structural molecule activity	1	Ribosome	Mitochondrial translation initiation; Mitochondrial translation elongation; Mitochondrial translation termination			429734	583864	496722	231679	283875	330436	405576	166365	283903	315564	257070	149927		18.7131	19.1553	18.9221	17.8218	18.1149	18.334	18.6296	17.344	18.115	18.2676	17.9718	17.1939		-0.433279	-0.128267	-0.364307	-0.398534	-0.64178	-0.466684	-0.414593	-0.676232	-0.541502	-0.708633	-0.77483	-0.813784
P01116	GTPase KRas	KRAS		cell communication;cell differentiation;cell organization and biogenesis;cellular component movement;metabolic process;regulation of biological process;response to stimulus	cytoplasm;cytosol;membrane;mitochondrion	catalytic activity;nucleotide binding;protein binding	12	Viral carcinogenesis; Serotonergic synapse; Longevity regulating pathway - multiple species; T cell receptor signaling pathway; Dorso-ventral axis formation; Tight junction; Hepatitis B; Insulin signaling pathway; Central carbon metabolism in cancer; Pancreatic cancer; FoxO signaling pathway; Prolactin signaling pathway; MicroRNAs in cancer; Phospholipase D signaling pathway; Chronic myeloid leuk…	Regulation of RAS by GAPs; SHC-mediated cascade:FGFR4; Signaling by FGFR4 in disease; FRS-mediated FGFR4 signaling; SHC1 events in ERBB4 signaling; NCAM signaling for neurite out-growth; DAP12 signaling; GRB2 events in EGFR signaling; Signaling by BRAF and RAF fusions; Constitutive Signaling by EGFRvIII; Signaling by RAS mutants; CD209 (DC-SIGN) signaling; Signaling by high-kinase activity BRAF m…	IL-5 Signaling Pathway; Integrated Breast Cancer Pathway; Signaling Pathways in Glioblastoma; RalA downstream regulated genes; TNF alpha Signaling Pathway; Oncostatin M Signaling Pathway; Aryl Hydrocarbon Receptor; Extracellular vesicle-mediated signaling in recipient cells; Rac1/Pak1/p38/MMP-2 pathway; G Protein Signaling Pathways; BDNF-TrkB Signaling; MAPK Signaling Pathway; PI3K-AKT-mTOR signa…		513603	322196	680464	132924	179108	259888	349154	105040	186318	257347	204228	125461		18.9703	18.2976	19.3762	17.0202	17.4505	17.9875	18.4135	16.6806	17.5074	17.9734	17.6398	16.9369		-0.176069	-0.985961	0.0897723	-1.20005	-1.3062	-0.813163	-0.630702	-1.33964	-1.14913	-1.00285	-1.10681	-1.07081
Q9BYD1	39S ribosomal protein L13, mitochondrial	MRPL13		cell organization and biogenesis;metabolic process	membrane;mitochondrion;ribosome	protein binding;RNA binding;structural molecule activity	8	Ribosome	Mitochondrial translation initiation; Mitochondrial translation elongation; Mitochondrial translation termination			243472	157642	168897	69599	92335.3	129518	127557	41157.1		211486	131679			17.8934	17.2663	17.3658	16.0868	16.4946	16.9828	16.9608	15.3289		17.6902	17.0067			-1.25297	-2.01725	-1.9206	-2.13352	-2.26208	-1.8179	-2.08342	-2.69137		-1.286	-1.73996
Q8N5K1	CDGSH iron-sulfur domain-containing protein 2	CISD2		metabolic process;regulation of biological process	endoplasmic reticulum;membrane;mitochondrion	metal ion binding;protein binding;RNA binding	4					41602.4	118010	188145	46088.3	15746	83830.1	82544.8	27290.2	67863.5	96962.7	90165.7	26900.4		15.3444	16.8486	17.5215	15.4921	13.9427	16.3552	16.3329	14.7361	16.0503	16.5651	16.4603	14.7153		-3.80198	-2.43499	-1.7649	-2.72819	-4.81398	-2.44551	-2.71131	-3.28413	-2.60619	-2.41106	-2.28634	-3.29234
Q9NRK6	ATP-binding cassette sub-family B member 10, mitochondrial	ABCB10		transport	membrane;mitochondrion	catalytic activity;nucleotide binding;protein binding;transporter activity	1	ABC transporters	Mitochondrial ABC transporters			172785	255010	262913	163677	191440	138863	233252	24987.2	135740	101170	117934			17.3986	17.9602	18.0042	17.3205	17.5465	17.0833	17.8315	14.6089	17.0505	16.6264	16.8476			-1.74774	-1.32335	-1.28216	-0.899807	-1.21015	-1.71739	-1.21268	-3.41132	-1.60605	-2.34979	-1.89901
O15260	Surfeit locus protein 4	SURF4		cell organization and biogenesis;regulation of biological process;transport	endoplasmic reticulum;Golgi;membrane	protein binding	9; CHR_HG2030_PATCH		COPI-dependent Golgi-to-ER retrograde traffic; Neutrophil degranulation			487304	540800	626655	45629.6	225911	301154	359578	12473.4	177342	234543	234745	30862.8		18.8945	19.0447	19.2573	15.4777	17.7854	18.2001	18.4559	13.6066	17.4362	17.8395	17.8407	14.9136		-0.251901	-0.238804	-0.0290745	-2.74262	-0.971278	-0.600555	-0.588261	-4.41365	-1.22037	-1.13671	-0.905894	-3.0941
Q9P0S3	ORM1-like protein 1	ORMDL1		cellular homeostasis;metabolic process;regulation of biological process	endoplasmic reticulum;membrane		2		Sphingolipid de novo biosynthesis			255447	358029	290245			163508	289148		110550		99760.1			17.9627	18.4497	18.1469			17.319	18.1414		16.7543		16.6062			-1.1837	-0.833824	-1.13948			-1.4817	-0.902756		-1.9022		-2.14046
Q13454	Tumor suppressor candidate 3	TUSC3		metabolic process;transport	endoplasmic reticulum;membrane;mitochondrion	catalytic activity;transporter activity	8	N-Glycan biosynthesis; Protein processing in endoplasmic reticulum; Metabolic pathways	Asparagine N-linked glycosylation; Miscellaneous transport and binding events			252199	400563	444856		198774		392949			312435	206877	58342.6		17.9442	18.6117	18.763		17.6008		18.584			18.2532	17.6584	15.8323		-1.20216	-0.671869	-0.523407		-1.1559		-0.460221			-0.723007	-1.08821	-2.17542
P05388	60S acidic ribosomal protein P0	RPLP0		cell organization and biogenesis;metabolic process;regulation of biological process;response to stimulus;transport	cytoplasm;cytosol;endoplasmic reticulum;membrane;nucleus;ribosome	protein binding;RNA binding;structural molecule activity	12	Ribosome	Peptide chain elongation; Gene and protein expression by JAK-STAT signaling after Interleukin-12 stimulation; Eukaryotic Translation Termination; Viral mRNA Translation; L13a-mediated translational silencing of Ceruloplasmin expression; Nonsense Mediated Decay (NMD) independent of the Exon Junction Complex (EJC); Selenocysteine synthesis; Nonsense Mediated Decay (NMD) enhanced by the Exon Junctio…	Cytoplasmic Ribosomal Proteins		1.34669e+06	1.4629e+06	1.38365e+06	443981	866123	679776	1.10526e+06	237601	684920	495467	535183	214669		20.361	20.4804	20.4	18.7601	19.7242	19.3747	20.076	17.8582	19.3856	18.9184	19.0297	17.7118		1.21463	1.19686	1.11366	0.539838	0.967537	0.574005	1.03175	-0.16204	0.729037	-0.0577746	0.283042	-0.29593
Q5SRD1	Putative mitochondrial import inner membrane translocase subunit Tim23B	TIMM23B; LINC00843; LOC100652748		transport	membrane;mitochondrion	transporter activity	10					1.38124e+06	1.58812e+06	1.24624e+06	726750	736967	1.04351e+06	1.13122e+06	438940	735727	1.06204e+06	742238	468710		20.3975	20.5989	20.2491	19.4711	19.4912	19.993	20.1095	18.7437	19.4888	20.0184	19.5015	18.8383		1.25116	1.31535	0.962763	1.2508	0.734566	1.19231	1.06525	0.723443	0.832271	1.0422	0.75489	0.830654
P16401	Histone H1.5	HIST1H1B		cell organization and biogenesis;regulation of biological process	chromosome;nucleus	DNA binding;protein binding;RNA binding	6		Formation of Senescence-Associated Heterochromatin Foci (SAHF); Activation of DNA fragmentation factor			1.8576e+07	2.01639e+07	20651924	9.94903e+06	1.28739e+07	1.1522e+07	1.10838e+07	8.55834e+06	1.23043e+07	1.38426e+07	11407629	8357094		24.1469	24.2653	24.2998	23.2461	23.6179	23.4579	23.4019	23.0289	23.5527	23.7226	23.4435	22.9946		5.00058	4.98173	5.01339	5.02583	4.86127	4.65719	4.35774	5.00868	4.89612	4.7464	4.69686	4.98689
P54652	Heat shock-related 70 kDa protein 2	HSPA2		cell differentiation;cell organization and biogenesis;metabolic process;regulation of biological process;response to stimulus	cell surface;cytoplasm;cytoskeleton;cytosol;membrane;mitochondrion;nucleus	nucleotide binding;protein binding	14	Endocytosis; Longevity regulating pathway - multiple species; Epstein-Barr virus infection; Spliceosome; MAPK signaling pathway; Protein processing in endoplasmic reticulum; Toxoplasmosis; Measles; Influenza A; Estrogen signaling pathway; Legionellosis; Antigen processing and presentation	Meiotic synapsis; Attenuation phase; HSP90 chaperone cycle for steroid hormone receptors (SHR); Regulation of HSF1-mediated heat shock response	Parkin-Ubiquitin Proteasomal System pathway		157864	307002	378953	121045	185520	144116	184179	61041.6	262675	113109	113979	105888		17.2683	18.2279	18.5317	16.8852	17.5012	17.1369	17.4908	15.8975	18.0029	16.7874	16.7984	16.6922		-1.87804	-1.05565	-0.754729	-1.33511	-1.25546	-1.66382	-1.55345	-2.12272	-0.653622	-2.18885	-1.94822	-1.3155
P20020	Plasma membrane calcium-transporting ATPase 1											225074	538389	148042	14228	111433	75501.3	147908		89869.8	77587.1	27953			17.78	19.0383	17.1756	13.7964	16.7658	16.2042	17.1743		16.4555	16.2435	14.7707			-1.36632	-0.24525	-2.11074	-4.42385	-1.99086	-2.59648	-1.86986		-2.20099	-2.73268	-3.97592
P46778	60S ribosomal protein L21	RPL21		cell organization and biogenesis;metabolic process;transport	cytosol;membrane;ribosome	protein binding;RNA binding;structural molecule activity	13	Ribosome	Peptide chain elongation; Eukaryotic Translation Termination; Viral mRNA Translation; L13a-mediated translational silencing of Ceruloplasmin expression; Nonsense Mediated Decay (NMD) independent of the Exon Junction Complex (EJC); Selenocysteine synthesis; Nonsense Mediated Decay (NMD) enhanced by the Exon Junction Complex (EJC); GTP hydrolysis and joining of the 60S ribosomal subunit; Major path…	Cytoplasmic Ribosomal Proteins		3.49013e+06	3.46624e+06	2.70454e+06	743080	1.44344e+06	1.33613e+06	2.33813e+06	676674	1.91036e+06	2.15016e+06	1.51475e+06	827370		21.7348	21.7249	21.367	19.5032	20.4611	20.3496	21.1569	19.3681	20.8654	21.036	20.5306	19.6582		2.58849	2.4414	2.08057	1.28286	1.70441	1.54893	2.11272	1.34788	2.20887	2.05981	1.78401	1.65049
O15321	Transmembrane 9 superfamily member 1	TM9SF1		metabolic process	membrane;vacuole		14					498686	537448	612082	76500	204604	375011	387384	24653	146511	303946	248852	30366.6		18.9278	19.0358	19.2234	16.2232	17.6425	18.5166	18.5634	14.5895	17.1607	18.2135	17.9249	14.8902		-0.218591	-0.247774	-0.0630209	-1.99713	-1.1142	-0.284122	-0.480802	-3.43075	-1.49589	-0.762749	-0.821701	-3.11748
P04843	Dolichyl-diphosphooligosaccharide--protein glycosyltransferase subunit 1	RPN1		metabolic process	cytosol;endoplasmic reticulum;membrane	catalytic activity;protein binding;RNA binding	3	N-Glycan biosynthesis; Protein processing in endoplasmic reticulum; Metabolic pathways	Asparagine N-linked glycosylation; SRP-dependent cotranslational protein targeting to membrane	Proteasome Degradation		2.38354e+06	2.7119e+06	2.82604e+06	231354	940136	1.28672e+06	1.5217e+06	135573	736282	1.00094e+06	923266	215517		21.1847	21.3709	21.4303	17.8197	19.8425	20.2953	20.5373	17.0487	19.4899	19.9329	19.8164	17.7174		2.03831	2.08733	2.14396	-0.400555	1.08584	1.49457	1.49305	-0.97151	0.833359	0.956713	1.06976	-0.290243
Q9UMS4	Pre-mRNA-processing factor 19	PRPF19		cell organization and biogenesis;cell proliferation;metabolic process;regulation of biological process;response to stimulus	cytoplasm;cytoskeleton;membrane;nucleus;spliceosomal complex	catalytic activity;metal ion binding;protein binding	11	Ubiquitin mediated proteolysis; Spliceosome	Dual incision in TC-NER; Formation of TC-NER Pre-Incision Complex; mRNA Splicing - Major Pathway; Gap-filling DNA repair synthesis and ligation in TC-NER			4.41748e+06	5.92733e+06	4.74237e+06	1.26042e+06	1.76303e+06	2.30913e+06	4.43787e+06	1.08139e+06	2.63537e+06	3.42286e+06	2.62711e+06	1.32524e+06		22.0748	22.499	22.1772	20.2655	20.7496	21.1389	22.0814	20.0445	21.3296	21.7068	21.325	20.3378		2.92843	3.21541	2.89079	2.04518	1.99295	2.33822	3.03723	2.02424	2.67303	2.73056	2.57841	2.33014
P84098	60S ribosomal protein L19	RPL19		cell organization and biogenesis;metabolic process;transport	cytosol;membrane;ribosome	protein binding;RNA binding;structural molecule activity	17	Ribosome	Peptide chain elongation; Eukaryotic Translation Termination; Viral mRNA Translation; L13a-mediated translational silencing of Ceruloplasmin expression; Nonsense Mediated Decay (NMD) independent of the Exon Junction Complex (EJC); Selenocysteine synthesis; Nonsense Mediated Decay (NMD) enhanced by the Exon Junction Complex (EJC); GTP hydrolysis and joining of the 60S ribosomal subunit; Major path…	Cytoplasmic Ribosomal Proteins		6.92544e+06	6.81351e+06	6.3637e+06	3.11623e+06	4.33863e+06	4.18369e+06	5.14137e+06	2.45701e+06	4.3724e+06	4.37184e+06	4.08524e+06	2.66866e+06		22.7235	22.7	22.6014	21.5714	22.0488	21.9963	22.2937	21.2285	22.06	22.0598	21.962	21.3477		3.57711	3.41643	3.31505	3.35107	3.29213	3.19565	3.24952	3.20825	3.40345	3.0836	3.21536	3.34
P29372	DNA-3-methyladenine glycosylase	MPG		metabolic process;response to stimulus	cytoplasm;mitochondrion;nucleus	catalytic activity;DNA binding;protein binding	16	Base excision repair	Recognition and association of DNA glycosylase with site containing an affected purine; Cleavage of the damaged purine; Displacement of DNA glycosylase by APEX1			260941	359674	177546	54160.6	133876	151017	189324	17049.4	144379	181839	241867	91316.9		17.9934	18.4563	17.4378	15.725	17.0305	17.2044	17.5305	14.0574	17.1395	17.4723	17.8839	16.4786		-1.153	-0.82721	-1.84855	-2.49534	-1.72614	-1.59634	-1.51371	-3.96279	-1.51703	-1.5039	-0.862776	-1.52909
O60884	DnaJ homolog subfamily A member 2	DNAJA2		metabolic process;regulation of biological process;response to stimulus	cytosol;membrane	enzyme regulator activity;metal ion binding;nucleotide binding;protein binding	16	Protein processing in endoplasmic reticulum	HSP90 chaperone cycle for steroid hormone receptors (SHR)			614883	614752	819812	137690	285305	368756	321738	151900	194800	269979	283761	129714		19.23	19.2296	19.6449	17.0711	18.1221	18.4923	18.2955	17.2128	17.5716	18.0425	18.1143	16.985		0.0835893	-0.0538942	0.358548	-1.14923	-0.634531	-0.308388	-0.748677	-0.807463	-1.08491	-0.933719	-0.632314	-1.0227
Q99442	Translocation protein SEC62	SEC62		cell organization and biogenesis;transport	cytosol;endoplasmic reticulum;membrane	receptor activity;transporter activity	3	Protein export; Protein processing in endoplasmic reticulum	XBP1(S) activates chaperone genes			792013	647893	961400	135424	316551	593770	477763	53447.3	292013	291763	304917	58716.4		19.5952	19.3054	19.8748	17.0471	18.2721	19.1795	18.8659	15.7058	18.1557	18.1544	18.2181	15.8415		0.448801	0.0218566	0.588391	-1.17317	-0.484598	0.378849	-0.178269	-2.31439	-0.500867	-0.821768	-0.528574	-2.16621
O14683	Tumor protein p53-inducible protein 11	TP53I11		regulation of biological process;response to stimulus	membrane		11					190508	237675	219203		66352.3	94671.7	96663.3		32831.8	27705.6	76175.6	7132.41		17.5395	17.8586	17.7419		16.0179	16.5306	16.5607		15.0028	14.7579	16.217	12.8002		-1.60687	-1.42491	-1.54448		-2.73882	-2.27005	-2.48352		-3.65373	-4.21832	-2.52959	-5.20751
O00425	Insulin-like growth factor 2 mRNA-binding protein 3	IGF2BP3		metabolic process;regulation of biological process;transport	cytoplasm;cytosol;membrane;nucleus	protein binding;RNA binding;translation regulator activity	7		Insulin-like Growth Factor-2 mRNA Binding Proteins (IGF2BPs/IMPs/VICKZs) bind RNA			327376	401432	303232	130265	229019	168965	250794	96966.4	164890	176381	100451	90424.6		18.3206	18.6148	18.2101	16.9911	17.8051	17.3664	17.9361	16.5652	17.3311	17.4283	16.6161	16.4644		-0.825773	-0.668743	-1.07632	-1.22921	-0.951567	-1.43433	-1.10806	-1.45503	-1.32539	-1.54787	-2.1305	-1.54325
P29966	Myristoylated alanine-rich C-kinase substrate	MARCKS		cell organization and biogenesis;regulation of biological process	cytoplasm;cytoskeleton;membrane;nucleus	protein binding	6	MicroRNAs in cancer; Fc gamma R-mediated phagocytosis	Acetylcholine regulates insulin secretion	Brain-Derived Neurotrophic Factor (BDNF) signaling pathway		151496	117011	216085	98570.7	81895.2	76235.3	109381	80582.8	34750.8	95707	82477.3	66375.2		17.2089	16.8363	17.7212	16.5889	16.3215	16.2182	16.739	16.2982	15.0848	16.5463	16.3317	16.0184		-1.93744	-2.44726	-1.56515	-1.63143	-2.43518	-2.58252	-2.3052	-1.72204	-3.57178	-2.42987	-2.41492	-1.98933
Q5TGZ0	MICOS complex subunit MIC10	MINOS1			membrane;mitochondrion	protein binding	1		Cristae formation			1753612	1.75331e+06	2320227	881456	995510	1.09372e+06	1.00702e+06	937642	730553	910686	1.11308e+06	570925		20.7419	20.7417	21.1458	19.7495	19.9251	20.0608	19.9417	19.8387	19.4786	19.7966	20.0861	19.1229		1.59554	1.45811	1.85945	1.52923	1.1684	1.26011	0.897458	1.81846	0.82209	0.820389	1.3395	1.11526
Q9NPF5	DNA methyltransferase 1-associated protein 1	DMAP1		cell organization and biogenesis;metabolic process;regulation of biological process;response to stimulus	cytoplasm;cytosol;nucleus	protein binding	1		HATs acetylate histones			191664	293050	265093	97669	260337	186953	178576		250634					17.5482	18.1608	18.0161	16.5756	17.99	17.5123	17.4462		17.9352					-1.59814	-1.12275	-1.27025	-1.64469	-0.766652	-1.28838	-1.59803		-0.721316
Q14165	Malectin	MLEC		metabolic process;transport	endoplasmic reticulum;membrane	protein binding	12		Neutrophil degranulation; N-glycan trimming in the ER and Calnexin/Calreticulin cycle			835404	1.01066e+06	1.08151e+06	172276	436849	624582	659410	68317.3	345139	536234	562191	127602		19.6721	19.9469	20.0446	17.3944	18.7368	19.2525	19.3308	16.06	18.3968	19.0325	19.1007	16.9613		0.525751	0.663332	0.758223	-0.825936	-0.0199007	0.451836	0.286611	-1.96026	-0.25972	0.0562986	0.354069	-1.04639
Q15084	Protein disulfide-isomerase A6	PDIA6		cellular homeostasis;metabolic process;regulation of biological process;response to stimulus;transport	cytosol;endoplasmic reticulum;membrane;organelle lumen	catalytic activity;protein binding	2	Protein processing in endoplasmic reticulum	Post-translational protein phosphorylation; Regulation of Insulin-like Growth Factor (IGF) transport and uptake by Insulin-like Growth Factor Binding Proteins (IGFBPs); XBP1(S) activates chaperone genes	Photodynamic therapy-induced unfolded protein response		580784	886182	650114	368981	326158	483390	423333	317618	156428	501565	337397	349529		19.1476	19.7572	19.3103	18.4932	18.3152	18.8828	18.6914	18.2769	17.2551	18.9361	18.3641	18.4151		0.00127876	0.473704	0.0239477	0.272886	-0.441464	0.0821313	-0.352772	0.25671	-1.4014	-0.0401278	-0.382542	0.407368
P78316	Nucleolar protein 14	NOP14		metabolic process	membrane;mitochondrion;nucleus	protein binding;RNA binding	4		Major pathway of rRNA processing in the nucleolus and cytosol; rRNA modification in the nucleus and cytosol			1.2164e+06	1.45219e+06	1.39559e+06	515328	875769	662433	937902	479006	1.02452e+06	1.01948e+06	713543	445425		20.2142	20.4698	20.4124	18.9751	19.7402	19.3374	19.8391	18.8697	19.9665	19.9594	19.4446	18.7648		1.06782	1.18626	1.12606	0.754831	0.983515	0.536719	0.794873	0.849461	1.30997	0.983196	0.698011	0.757142
P67809	Nuclease-sensitive element-binding protein 1	YBX1		metabolic process;regulation of biological process	cytoplasm;cytosol;extracellular;membrane;nucleus;spliceosomal complex	DNA binding;protein binding;RNA binding	1		mRNA Splicing - Major Pathway; mRNA Splicing - Minor Pathway	Brain-Derived Neurotrophic Factor (BDNF) signaling pathway; Mecp2 and Associated Rett Syndrome; mRNA Processing; Sudden Infant Death Syndrome (SIDS) Susceptibility Pathways		4.36297e+06	3.43214e+06	3.7802e+06	1.06985e+06	2.00776e+06	1.775e+06	2.36044e+06	1.10506e+06	1.74738e+06	1.66051e+06	1.30834e+06	817092		22.0569	21.7107	21.85	20.029	20.9372	20.7594	21.1706	20.0757	20.7368	20.6632	20.3193	19.6401		2.91052	2.42714	2.56364	1.80868	2.18048	1.95869	2.12642	2.05547	2.08023	1.68699	1.57268	1.63246
P78386	Keratin, type II cuticular Hb5	KRT85		cell death	cytosol	structural molecule activity	12		Formation of the cornified envelope			3.40162e+06	2.97103e+06	3.84695e+06	1.85388e+06	2.47462e+06	2.16508e+06	2.0799e+06	1.30494e+06	1.97303e+06	2.33885e+06	1.94096e+06	1.12571e+06		21.6978	21.5025	21.8753	20.8221	21.2388	21.046	20.9881	20.3155	20.912	21.1574	20.8883	20.1024		2.55143	2.21899	2.5889	2.60182	2.4821	2.2453	1.94388	2.29533	2.25544	2.18116	2.14171	2.09472
Q15125	3-beta-hydroxysteroid-Delta(8),Delta(7)-isomerase	EBP		metabolic process;regulation of biological process;response to stimulus;transport	endoplasmic reticulum;membrane;nucleus	catalytic activity;protein binding;receptor activity;signal transducer activity;transporter activity	X	Steroid biosynthesis; Metabolic pathways	Cholesterol biosynthesis via desmosterol; Cholesterol biosynthesis via lathosterol			741120	744937	519511	162530	483020	453119	471356	28461.7	176499	252359	285749	25073.9		19.4993	19.5068	18.9868	17.3103	18.8817	18.7895	18.8465	14.7967	17.4293	17.9451	18.1244	14.6139		0.352985	0.22322	-0.29959	-0.909951	0.125048	-0.0111653	-0.197746	-3.22349	-1.22724	-1.03109	-0.622243	-3.39379
Q5T9A4	ATPase family AAA domain-containing protein 3B	ATAD3B		transport	membrane;mitochondrion	catalytic activity;nucleotide binding;RNA binding	1		Neutrophil degranulation				489982	456857				551234			579561					18.9024	18.8014				19.0723			19.1446					-0.381171	-0.485003				0.0281004			0.168396
Q9H061	Transmembrane protein 126A	TMEM126A			membrane;mitochondrion		11					968236	1.1705e+06	1.13214e+06	1.11975e+06	841134	736558	687024	480145	588117	574857	464359	415905		19.885	20.1587	20.1106	20.0947	19.682	19.4904	19.39	18.8731	19.1657	19.1328	18.8249	18.6659		0.738636	0.875158	0.824231	1.87444	0.9253	0.689743	0.345795	0.852889	0.509204	0.156637	0.0782495	0.658211
Q5M775	Cytospin-B	SPECC1		cell organization and biogenesis;metabolic process;transport	cytoskeleton;Golgi;membrane;nucleus	catalytic activity;motor activity;protein binding;transporter activity	17					246502	171267	284650	150814	139579	151319	163071	89151.7	123366	205190	196851	120808		17.9112	17.3859	18.1188	17.2024	17.0907	17.2072	17.3151	16.444	16.9126	17.6466	17.5867	16.8824		-1.23513	-1.89766	-1.16755	-1.01789	-1.66596	-1.59346	-1.72906	-1.57625	-1.74395	-1.3296	-1.15988	-1.12533
Q9H845	Acyl-CoA dehydrogenase family member 9, mitochondrial	ACAD9		cell organization and biogenesis;metabolic process	membrane;mitochondrion;nucleus	catalytic activity;nucleotide binding;protein binding	3		Complex I biogenesis			3.67042e+06	5.73362e+06	3.7995e+06	2.83715e+06	2.72726e+06	2.43088e+06	2.14803e+06	2.33388e+06	2.26625e+06	1.57002e+06	1.54347e+06	1.79949e+06		21.8075	22.451	21.8574	21.436	21.379	21.213	21.0346	21.1543	21.1119	20.5824	20.5577	20.7792		2.66115	3.16748	2.57099	3.21571	2.62235	2.41235	1.99038	3.13408	2.45534	1.60615	1.81111	2.77148
O00469	Procollagen-lysine,2-oxoglutarate 5-dioxygenase 2	PLOD2		metabolic process;response to stimulus	endoplasmic reticulum;membrane	catalytic activity;metal ion binding	3	Lysine degradation	Collagen biosynthesis and modifying enzymes			197020		256100	131286		91673.9		168476				37531.5		17.588		17.9663	17.0024		16.4842		17.3622				15.1958		-1.55838		-1.32004	-1.21795		-2.31647		-0.658041				-2.81187
P11177	Pyruvate dehydrogenase E1 component subunit beta, mitochondrial	PDHB		metabolic process;regulation of biological process	mitochondrion;nucleus;organelle lumen	catalytic activity;protein binding	3	Citrate cycle (TCA cycle); HIF-1 signaling pathway; Central carbon metabolism in cancer; Carbon metabolism; Pyruvate metabolism; Glucagon signaling pathway; Glycolysis / Gluconeogenesis; Metabolic pathways	Regulation of pyruvate dehydrogenase (PDH) complex; Signaling by Retinoic Acid; Glyoxylate metabolism and glycine degradation	Glycolysis and Gluconeogenesis		288481	371700	250841	174208	160193	205290	218180	127410	112225	155461	164126	115046		18.1381	18.5038	17.9364	17.4105	17.2894	17.6473	17.7352	16.9591	16.776	17.2462	17.3244	16.8119		-1.00825	-0.779761	-1.34997	-0.809845	-1.46723	-1.15339	-1.30905	-1.0611	-1.88051	-1.73001	-1.42218	-1.19583
Q8TCT9	Minor histocompatibility antigen H13	HM13		cell organization and biogenesis;metabolic process	cell surface;endoplasmic reticulum;membrane	catalytic activity;protein binding	20					817179	960695	1.09209e+06	140305	386067	667127	533400	71978.6	201115	362816	373320	67319.5		19.6403	19.8737	20.0587	17.0982	18.5585	19.3476	19.0249	16.1353	17.6177	18.4689	18.5101	16.0387		0.493929	0.590179	0.77228	-1.12209	-0.198185	0.546906	-0.0193471	-1.88494	-1.03888	-0.507325	-0.236579	-1.96894
P26373	60S ribosomal protein L13	RPL13		cell organization and biogenesis;metabolic process;transport	cytosol;membrane;nucleus;ribosome	protein binding;RNA binding;structural molecule activity	16	Ribosome	Peptide chain elongation; Eukaryotic Translation Termination; Viral mRNA Translation; L13a-mediated translational silencing of Ceruloplasmin expression; Nonsense Mediated Decay (NMD) independent of the Exon Junction Complex (EJC); Selenocysteine synthesis; Nonsense Mediated Decay (NMD) enhanced by the Exon Junction Complex (EJC); GTP hydrolysis and joining of the 60S ribosomal subunit; Major path…	Cytoplasmic Ribosomal Proteins		5.44332e+06	5.02448e+06	6.24403e+06	2.38935e+06	3.46527e+06	3.61216e+06	3.5346e+06	2.08349e+06	3.58342e+06	3.79782e+06	6.2403e+06	3.30548e+06		22.3761	22.2605	22.574	21.1882	21.7245	21.7844	21.7531	20.9906	21.7729	21.8567	22.5732	21.6564		3.22969	2.977	3.28766	2.96788	2.96786	2.98374	2.70891	2.97035	3.11637	2.88054	3.82655	3.64874
Q99459	Cell division cycle 5-like protein	CDC5L		cell differentiation;cell organization and biogenesis;metabolic process;regulation of biological process;response to stimulus	cytoplasm;membrane;nucleus;spliceosomal complex	DNA binding;protein binding;RNA binding	6	Spliceosome	mRNA Splicing - Major Pathway			967781	1.30695e+06	1.11686e+06	371361	560288	581891	852948	351225	871330	951474	804298	504372		19.8843	20.3178	20.091	18.5025	19.0958	19.1504	19.7021	18.422	19.7329	19.8598	19.6174	18.9441		0.737958	1.03423	0.804633	0.282164	0.339134	0.349694	0.657894	0.401813	1.07632	0.883599	0.87074	0.936445
Q9H5V9	UPF0428 protein CXorf56	CXorf56					X					144478	254106	147521	77461.5	91183.5	103735	162798	43695.9	140371	193196	115592	69498.2		17.1405	17.9551	17.1706	16.2412	16.4765	16.6625	17.3127	15.4152	17.0989	17.5597	16.8187	16.0847		-2.00588	-1.32847	-2.11582	-1.97911	-2.28019	-2.13815	-1.73148	-2.60501	-1.55765	-1.4165	-1.92795	-1.92299
Q02218	2-oxoglutarate dehydrogenase, mitochondrial	OGDH		cellular component movement;metabolic process	cytosol;membrane;mitochondrion;organelle lumen	catalytic activity;metal ion binding;protein binding	7	Citrate cycle (TCA cycle); Carbon metabolism; Lysine degradation; Metabolic pathways; Tryptophan metabolism	Lysine catabolism; Glyoxylate metabolism and glycine degradation; Citric acid cycle (TCA cycle)	TCA Cycle and Deficiency of Pyruvate Dehydrogenase complex (PDHc); Amino Acid metabolism; Tryptophan metabolism; TCA Cycle		516902	490401	544218	192559	319193	321821	325496	168129	153974	188481	272659	161548		18.9795	18.9036	19.0538	17.5549	18.2841	18.2959	18.3123	17.3592	17.2323	17.5241	18.0567	17.3016		-0.166831	-0.379937	-0.232562	-0.665357	-0.472606	-0.504799	-0.731927	-0.661015	-1.42422	-1.45215	-0.689894	-0.706078
Q9P015	39S ribosomal protein L15, mitochondrial	MRPL15		cell organization and biogenesis;metabolic process	membrane;mitochondrion;ribosome	protein binding;RNA binding;structural molecule activity	8	Ribosome	Mitochondrial translation initiation; Mitochondrial translation elongation; Mitochondrial translation termination			679587	619562	680550	271723	298464	357569	540206	262809	285186	323989	281861	148816		19.3743	19.2409	19.3763	18.0518	18.1872	18.4479	19.0432	18.0037	18.1215	18.3056	18.1046	17.1832		0.227935	-0.0426516	0.0899548	-0.168525	-0.569477	-0.352833	-0.00105357	-0.0165698	-0.534996	-0.670618	-0.642007	-0.824509
Q6P1L8	39S ribosomal protein L14, mitochondrial	MRPL14		cell organization and biogenesis;metabolic process	membrane;mitochondrion;ribosome	RNA binding;structural molecule activity	6	Ribosome	Mitochondrial translation initiation; Mitochondrial translation elongation; Mitochondrial translation termination			299309	276627	415059	197838	208454	277639	114038	132359	26197	229937	162599	116091		18.1913	18.0776	18.663	17.594	17.6694	18.0829	16.7992	17.0141	14.6771	17.8109	17.311	16.8249		-0.955086	-1.20596	-0.623431	-0.626343	-1.0873	-0.717845	-2.24505	-1.00613	-3.97942	-1.16533	-1.43567	-1.18279
P12931	Proto-oncogene tyrosine-protein kinase Src	SRC		cell communication;cell organization and biogenesis;cell proliferation;cellular component movement;defense response;metabolic process;regulation of biological process;response to stimulus;transport	cytoplasm;cytoskeleton;cytosol;endosome;membrane;mitochondrion;nucleus;vacuole	catalytic activity;nucleotide binding;protein binding	20	Viral carcinogenesis; Endocytosis; Tight junction; Hepatitis B; Prolactin signaling pathway; VEGF signaling pathway; Rap1 signaling pathway; Oxytocin signaling pathway; ErbB signaling pathway; Thyroid hormone signaling pathway; Gap junction; Tuberculosis; EGFR tyrosine kinase inhibitor resistance; Focal adhesion; Proteoglycans in cancer; Adherens junction; Regulation of actin cytoskeleton; Bacter…	MET activates PTK2 signaling; Signal regulatory protein family interactions; CTLA4 inhibitory signaling; NCAM signaling for neurite out-growth; RUNX2 regulates osteoblast differentiation; FCGR activation; DCC mediated attractive signaling; Netrin mediated repulsion signals; Signaling by BRAF and RAF fusions; GRB2:SOS provides linkage to MAPK signaling for Integrins ; Signaling by RAS mutants; Sig…	Androgen receptor signaling pathway; Angiogenesis; Integrin-mediated Cell Adhesion; RANKL/RANK (Receptor activator of NFKB (ligand)) Signaling Pathway; Human Thyroid Stimulating Hormone (TSH) signaling pathway; Leptin signaling pathway; Follicle Stimulating Hormone (FSH) signaling pathway; Prolactin Signaling Pathway; Regulation of Microtubule Cytoskeleton; Signaling Pathways in Glioblastoma; AGE…		899726	661384	778164	271117	381777	536696	590937	159583	345634	565777	471017	291616		19.7791	19.3351	19.5697	18.0486	18.5424	19.0337	19.1726	17.2839	18.3989	19.1099	18.8454	18.1537		0.632764	0.0515885	0.283328	-0.171744	-0.214305	0.233049	0.12844	-0.736275	-0.257655	0.133669	0.0987899	0.146026
Q9NXX6	Non-structural maintenance of chromosomes element 4 homolog A	NSMCE4A		metabolic process;regulation of biological process;response to stimulus	chromosome;nucleus	protein binding	10		SUMOylation of DNA damage response and repair proteins			244028	312001	261061	120083	173662	82074.8	217131	110181	216974	240391	212515	111473		17.8967	18.2512	17.994	16.8737	17.4059	16.3247	17.7282	16.7495	17.7272	17.875	17.6972	16.7663		-1.24968	-1.03235	-1.29236	-1.34663	-1.35075	-2.47604	-1.316	-1.2707	-0.929373	-1.10118	-1.04943	-1.24135
P28288	ATP-binding cassette sub-family D member 3	ABCD3		cell organization and biogenesis;metabolic process;response to stimulus;transport	cytosol;membrane;mitochondrion;organelle lumen	catalytic activity;nucleotide binding;protein binding;transporter activity	1	Peroxisome; ABC transporters	ABC transporters in lipid homeostasis	Nuclear Receptors in Lipid Metabolism and Toxicity		937462	1.69132e+06	1.20379e+06	383749	689881	747515	888224	232373	658478	879552	727257	305929		19.8384	20.6897	20.1991	18.5498	19.396	19.5117	19.7606	17.8261	19.3288	19.7464	19.4721	18.2228		0.692037	1.40617	0.912762	0.329502	0.639314	0.711048	0.716359	-0.194141	0.672237	0.770205	0.725475	0.215157
P20339	Ras-related protein Rab-5A	RAB5A		cell organization and biogenesis;coagulation;metabolic process;regulation of biological process;response to stimulus;transport	cytoplasm;cytoskeleton;cytosol;endosome;membrane	catalytic activity;nucleotide binding;protein binding	3	Endocytosis; Amoebiasis; Tuberculosis; Phagosome; Vasopressin-regulated water reabsorption; Amyotrophic lateral sclerosis (ALS); Ras signaling pathway	TBC/RABGAPs; Clathrin-mediated endocytosis; Synthesis of PIPs at the plasma membrane; RAB GEFs exchange GTP for GDP on RABs; Factors involved in megakaryocyte development and platelet production; RAB geranylgeranylation	Amyotrophic lateral sclerosis (ALS); VEGFA-VEGFR2 Signaling Pathway; EGF/EGFR Signaling Pathway		677730	651671	727929	255682	355521	442870	665498	94717	443895	552484	431428	217708		19.3704	19.3138	19.4734	17.964	18.4396	18.7565	19.3441	16.5313	18.7599	19.0756	18.7188	17.732		0.223988	0.0302449	0.187052	-0.256309	-0.317099	-0.0441736	0.299871	-1.48889	0.10332	0.0993687	-0.0278713	-0.275645
Q02543	60S ribosomal protein L18a	RPL18A		cell organization and biogenesis;metabolic process;response to stimulus;transport	cytosol;membrane;ribosome	protein binding;RNA binding;structural molecule activity	19	Ribosome	Peptide chain elongation; Eukaryotic Translation Termination; Viral mRNA Translation; L13a-mediated translational silencing of Ceruloplasmin expression; Nonsense Mediated Decay (NMD) independent of the Exon Junction Complex (EJC); Selenocysteine synthesis; Nonsense Mediated Decay (NMD) enhanced by the Exon Junction Complex (EJC); GTP hydrolysis and joining of the 60S ribosomal subunit; Major path…	Cytoplasmic Ribosomal Proteins		5.38238e+06	5.32054e+06	4.87526e+06	2.50919e+06	3.55382e+06	3.32172e+06	3.98382e+06	1.90386e+06	3.24605e+06	3.74834e+06	2.94291e+06	1.73019e+06		22.3598	22.3431	22.217	21.2588	21.7609	21.6635	21.9257	20.8605	21.6303	21.8378	21.4888	20.7225		3.21345	3.0596	2.93066	3.03849	3.00427	2.8628	2.88151	2.84027	2.97371	2.86161	2.74218	2.71481
Q9P2E9	Ribosome-binding protein 1											321244	103478	395880	58117.1	84295.5	197788	127394	32858.3	120588	147144	106096	75259.1		18.2933	16.659	18.5947	15.8267	16.3632	17.5936	16.9589	15.004	16.8797	17.1669	16.695	16.1996		-0.853054	-2.62458	-0.691681	-2.39362	-2.39351	-1.2071	-2.08527	-3.01625	-1.77682	-1.80934	-2.05162	-1.8081
Q9UPN3	Microtubule-actin cross-linking factor 1, isoforms 1/2/3/5	MACF1		cell organization and biogenesis;regulation of biological process;response to stimulus;transport	cytoplasm;cytoskeleton;Golgi;membrane	catalytic activity;metal ion binding;motor activity;protein binding;RNA binding	1		Signaling by BRAF and RAF fusions	Mesodermal Commitment Pathway		58334.5	77754.8	38646.8	102525	34633	12600.2	47662.1	62939.6	42338.9		36763.9	48029.8		15.8321	16.2466	15.2381	16.6456	15.0799	13.6212	15.5406	15.9417	15.3697		15.166	15.5516		-3.3143	-3.0369	-4.04833	-1.57468	-3.67681	-5.17954	-3.50365	-2.07854	-3.28684		-3.58063	-2.45604
P62913	60S ribosomal protein L11	RPL11		cell organization and biogenesis;metabolic process;regulation of biological process;transport	cytoplasm;cytosol;membrane;nucleus;ribosome	protein binding;RNA binding;structural molecule activity	1	Ribosome	Peptide chain elongation; Eukaryotic Translation Termination; Viral mRNA Translation; L13a-mediated translational silencing of Ceruloplasmin expression; Nonsense Mediated Decay (NMD) independent of the Exon Junction Complex (EJC); Selenocysteine synthesis; Nonsense Mediated Decay (NMD) enhanced by the Exon Junction Complex (EJC); GTP hydrolysis and joining of the 60S ribosomal subunit; Major path…	Cytoplasmic Ribosomal Proteins		4.77023e+06	5.31011e+06	5.18677e+06	2.63597e+06	3.4069e+06	3.59724e+06	4.16138e+06	2.09574e+06	3.87253e+06	4.31975e+06	2.99245e+06	1.94127e+06		22.1856	22.3403	22.3064	21.3299	21.7	21.7785	21.9886	20.999	21.8848	22.0425	21.5129	20.8886		3.03927	3.05677	3.02002	3.1096	2.94335	2.97776	2.94443	2.97881	3.22831	3.06631	2.76626	2.88089
P00338	L-lactate dehydrogenase A chain	LDHA		metabolic process;regulation of biological process;response to stimulus	cytoplasm;cytosol;membrane;nucleus	catalytic activity;nucleotide binding;protein binding	11	Propanoate metabolism; HIF-1 signaling pathway; Central carbon metabolism in cancer; Pyruvate metabolism; Glucagon signaling pathway; Glycolysis / Gluconeogenesis; Metabolic pathways; Cysteine and methionine metabolism	Pyruvate metabolism	Cori Cycle; Photodynamic therapy-induced HIF-1 survival signaling; Amino Acid metabolism; Glycolysis and Gluconeogenesis		375940	414285	560682	204958	261521	269692	300378	183198	349340	281010	337018	232033		18.5201	18.6603	19.0968	17.645	17.9966	18.041	18.1964	17.483	18.4143	18.1003	18.3625	17.824		-0.626219	-0.623277	-0.189562	-0.575333	-0.760106	-0.759745	-0.847787	-0.537179	-0.242268	-0.875944	-0.384163	-0.18371
Q9Y320	Thioredoxin-related transmembrane protein 2	TMX2		cellular homeostasis;regulation of biological process	membrane		11					810163	687508	701026	81094.4	306614	420094	520374	31485.1	135407	245372	213582	46747.2		19.6279	19.391	19.4191	16.3073	18.2261	18.6804	18.9892	14.9424	17.0469	17.9046	17.7044	15.5126		0.48149	0.107476	0.132723	-1.91298	-0.53061	-0.120342	-0.0550146	-3.07784	-1.60959	-1.07159	-1.0422	-2.49509
Q16625	Occludin	OCLN		cell organization and biogenesis;metabolic process;regulation of biological process;response to stimulus	membrane	catalytic activity;motor activity;protein binding	5	Tight junction; Pathogenic Escherichia coli infection; Cell adhesion molecules (CAMs); Leukocyte transendothelial migration; Hepatitis C	Apoptotic cleavage of cell adhesion proteins; RUNX1 regulates expression of components of tight junctions	Pathogenic Escherichia coli infection; VEGFA-VEGFR2 Signaling Pathway		192394	350778	370296	97385.4	96651.2	136783	222543	118678	183267	200568	223952	113139		17.5537	18.4202	18.4983	16.5714	16.5605	17.0615	17.7637	16.8567	17.4836	17.6137	17.7728	16.7877		-1.59266	-0.863343	-0.788067	-1.64888	-2.19618	-1.73917	-1.28048	-1.16353	-1.17295	-1.36247	-0.973802	-1.21995
P62280	40S ribosomal protein S11	RPS11		cell differentiation;cell organization and biogenesis;metabolic process;transport	cytoplasm;cytosol;membrane;ribosome	protein binding;RNA binding;structural molecule activity	19	Ribosome	Peptide chain elongation; Eukaryotic Translation Termination; Viral mRNA Translation; Formation of the ternary complex, and subsequently, the 43S complex; L13a-mediated translational silencing of Ceruloplasmin expression; Selenocysteine synthesis; Nonsense Mediated Decay (NMD) independent of the Exon Junction Complex (EJC); Nonsense Mediated Decay (NMD) enhanced by the Exon Junction Complex (EJC)…	Cytoplasmic Ribosomal Proteins		9.31236e+06	9.5417e+06	1.11055e+07	5.31358e+06	7.16695e+06	6.90083e+06	7.23764e+06	3.62117e+06	5.15855e+06	6.5161e+06	5.46019e+06	3.40255e+06		23.1507	23.1858	23.4048	22.3413	22.7729	22.7183	22.7871	21.788	22.2985	22.6356	22.3805	21.6982		4.00435	3.90228	4.11839	4.12095	4.01625	3.91764	3.74288	3.7678	3.64199	3.65937	3.63389	3.6905
Q16643	Drebrin	DBN1		cell communication;cell differentiation;cell organization and biogenesis;cell proliferation;development;regulation of biological process	cytoplasm;cytoskeleton;membrane	protein binding	5					2.00673e+06	2.1582e+06	2.74867e+06	1.78365e+06	1.46302e+06	1.53216e+06	1.57696e+06	1.07462e+06	1.37183e+06	1.61118e+06	1.41712e+06	1.07233e+06		20.9364	21.0414	21.3903	20.7664	20.4805	20.5471	20.5887	20.0354	20.3877	20.6197	20.4345	20.0323		1.79005	1.75786	2.10392	2.5461	1.72385	1.74644	1.54451	2.01518	1.73113	1.64348	1.6879	2.02463
Q01650	Large neutral amino acids transporter small subunit 1	SLC7A5		cell differentiation;cellular component movement;development;metabolic process;transport	cytoplasm;cytosol;membrane	protein binding;transporter activity	16	Central carbon metabolism in cancer; mTOR signaling pathway	Tryptophan catabolism; Basigin interactions; Amino acid transport across the plasma membrane	Aryl Hydrocarbon Receptor Pathway		2.79091e+06	1.24198e+06	2.60204e+06	780778	1.09773e+06	1.25047e+06	1.3617e+06	539385	890431	1.0215e+06	937576	559518		21.4123	20.2442	21.3112	19.5746	20.0661	20.254	20.377	19.041	19.7641	19.9623	19.8386	19.0938		2.26594	0.96067	2.02483	1.35425	1.30942	1.45334	1.33278	1.02073	1.1076	0.986055	1.09194	1.08614
Q7KZN9	Cytochrome c oxidase assembly protein COX15 homolog	COX15		cell organization and biogenesis;metabolic process;transport	membrane;mitochondrion;nucleus	catalytic activity;transporter activity	10	Porphyrin and chlorophyll metabolism; Oxidative phosphorylation; Metabolic pathways	Heme biosynthesis	Electron Transport Chain		229267	301302	321042	180628	172868	202457	138187	137029	134308	136405	147259	25319.6		17.8067	18.2009	18.2924	17.4627	17.3993	17.6273	17.0763	17.0641	17.0352	17.0575	17.168	14.628		-1.3397	-1.08269	-0.993985	-0.757641	-1.35736	-1.17344	-1.96794	-0.956098	-1.62135	-1.91866	-1.57863	-3.37972
Q9Y4I1	Unconventional myosin-Va	MYO5A		cell communication;cell differentiation;cell organization and biogenesis;cellular component movement;metabolic process;regulation of biological process;response to stimulus;transport	cytoplasm;cytoskeleton;cytosol;endoplasmic reticulum;endosome;extracellular;Golgi;membrane;vacuole	catalytic activity;metal ion binding;motor activity;nucleotide binding;protein binding;RNA binding	15		Translocation of GLUT4 to the plasma membrane; Regulation of actin dynamics for phagocytic cup formation; Insulin processing			246660	265483	259592	169862	171944	155350	185524	121903	214056	149609	140532	138569		17.9122	18.0183	17.9859	17.374	17.3916	17.2452	17.5012	16.8954	17.7076	17.1908	17.1005	17.0802		-1.2342	-1.26528	-1.3005	-0.846293	-1.3651	-1.55554	-1.54296	-1.12485	-0.948911	-1.78537	-1.64609	-0.927435
P62834	Ras-related protein Rap-1A	RAP1A		cell organization and biogenesis;cellular homeostasis;regulation of biological process;response to stimulus;transport	cytoplasm;cytosol;endosome;membrane	catalytic activity;nucleotide binding;protein binding;transporter activity	1	Neurotrophin signaling pathway; Rap1 signaling pathway; MAPK signaling pathway; Long-term potentiation; Renal cell carcinoma; Pancreatic secretion; Focal adhesion; Leukocyte transendothelial migration; Ras signaling pathway; Chemokine signaling pathway; cAMP signaling pathway; Platelet activation	Signaling by BRAF and RAF fusions; MAP2K and MAPK activation; Glucagon-like Peptide-1 (GLP1) regulates insulin secretion; ARMS-mediated activation; GRB2:SOS provides linkage to MAPK signaling for Integrins ; MET activates RAP1 and RAC1; Signaling by RAS mutants; Signaling by high-kinase activity BRAF mutants; Signaling by moderate kinase activity BRAF mutants; p130Cas linkage to MAPK signaling fo…	Integrin-mediated Cell Adhesion; Integrated Breast Cancer Pathway; Human Thyroid Stimulating Hormone (TSH) signaling pathway; Brain-Derived Neurotrophic Factor (BDNF) signaling pathway; Common Pathways Underlying Drug Addiction; Focal Adhesion; Signaling of Hepatocyte Growth Factor Receptor; MAPK Signaling Pathway; VEGFA-VEGFR2 Signaling Pathway; Chemokine signaling pathway; EGF/EGFR Signaling Pa…		321057	236411	356569	128999	155549	205517	238703	86907	178207	237103	193032	102276		18.2925	17.8509	18.4438	16.977	17.247	17.6489	17.8649	16.4072	17.4432	17.8552	17.5585	16.6421		-0.853894	-1.4326	-0.842566	-1.2433	-1.50967	-1.1518	-1.17935	-1.61304	-1.21334	-1.12105	-1.18815	-1.36557
Q8TCC3	39S ribosomal protein L30, mitochondrial	MRPL30		cell organization and biogenesis;metabolic process	membrane;mitochondrion;ribosome	structural molecule activity	2	Ribosome	Mitochondrial translation initiation; Mitochondrial translation elongation; Mitochondrial translation termination			95546.1	73615.9	143815	45453.5	47569.2	64360.7	94806.2	24926.3	33102.4	89968.6	24966.8	14736.5		16.5439	16.1677	17.1339	15.4721	15.5377	15.9739	16.5327	14.6054	15.0146	16.4571	14.6077	13.8471		-2.60245	-3.11581	-2.15253	-2.7482	-3.21893	-2.8268	-2.51151	-3.41484	-3.64189	-2.51907	-4.13891	-4.16058
Q9H0U3	Magnesium transporter protein 1	MAGT1		metabolic process;transport	endoplasmic reticulum;membrane	catalytic activity;transporter activity	X		Asparagine N-linked glycosylation; Neutrophil degranulation; Miscellaneous transport and binding events			676997	857642	921005	115918	372936	473152	563032	51627.7	319851	420575	347636	52418.3		19.3688	19.71	19.8129	16.8228	18.5086	18.8519	19.1029	15.6559	18.287	18.682	18.4072	15.6778		0.222428	0.426477	0.526464	-1.39755	-0.248106	0.0512482	0.0586519	-2.36436	-0.369499	-0.2942	-0.339415	-2.3299
Q9BTV4	Transmembrane protein 43	TMEM43		cell organization and biogenesis	endoplasmic reticulum;Golgi;membrane;nucleus;organelle lumen	protein binding	3					505372	556890	539453	158795	307940	327585	346341	118823	288236	366855	284687	134168		18.947	19.087	19.0411	17.2768	18.2323	18.3215	18.4018	16.8585	18.1369	18.4848	18.119	17.0337		-0.199377	-0.196506	-0.245249	-0.943496	-0.524385	-0.479184	-0.64237	-1.16177	-0.519648	-0.491355	-0.627616	-0.974004
P16260	Graves disease carrier protein	SLC25A16		metabolic process;transport	membrane;mitochondrion	transporter activity	10		Coenzyme A biosynthesis			154552	111853	119921	126038		136425	101792	88206.1	115540	142168	108091	72580		17.2377	16.7712	16.8717	16.9435		17.0577	16.6353	16.4286	16.818	17.1172	16.7219	16.1473		-1.90863	-2.5123	-2.41466	-1.2768		-1.74295	-2.40894	-1.59163	-1.83851	-1.85897	-2.02474	-1.8604
Q9P0M9	39S ribosomal protein L27, mitochondrial	MRPL27		cell organization and biogenesis;metabolic process	membrane;mitochondrion;ribosome	protein binding;RNA binding;structural molecule activity	17	Ribosome	Mitochondrial translation initiation; Mitochondrial translation elongation; Mitochondrial translation termination			637614	653334	664295	240859	378826	395297	513466	186108	322390	428833	351462	186321		19.2823	19.3175	19.3415	17.8778	18.5312	18.5926	18.9699	17.5058	18.2984	18.7101	18.423	17.5074		0.13596	0.0339216	0.0550776	-0.342468	-0.2255	-0.20812	-0.0742963	-0.514439	-0.358091	-0.26615	-0.323622	-0.500248
Q96MF7	E3 SUMO-protein ligase NSE2	NSMCE2		cell division;cell organization and biogenesis;metabolic process;regulation of biological process;response to stimulus	chromosome;nucleus	catalytic activity;metal ion binding;protein binding	8		SUMOylation of DNA damage response and repair proteins			351953	449060	322801	129985	208396	206688	307678	90813.9	267784	335983	201476	124526		18.425	18.7765	18.3003	16.988	17.669	17.6571	18.2311	16.4706	18.0307	18.358	17.6202	16.9261		-0.721338	-0.506991	-0.9861	-1.23231	-1.0877	-1.1436	-0.813142	-1.5496	-0.625827	-0.618177	-1.12638	-1.08159
P18754	Regulator of chromosome condensation	RCC1		cell division;cell organization and biogenesis;regulation of biological process	chromosome;cytoplasm;membrane;nucleus	DNA binding;protein binding	1		Rev-mediated nuclear export of HIV RNA; Nuclear import of Rev protein			159495	260658	165095	76418.1	68966.9	92127.2	195527	64972.2	166814	322964	160099	104038		17.2832	17.9918	17.3329	16.2216	16.0736	16.4913	17.577	15.9875	17.3479	18.301	17.2886	16.6667		-1.86321	-1.29174	-1.95345	-1.99867	-2.68306	-2.30936	-1.46719	-2.03269	-1.30866	-0.675189	-1.45802	-1.34094
P61254	60S ribosomal protein L26	RPL26		cell organization and biogenesis;metabolic process;regulation of biological process;response to stimulus;transport	cytoplasm;cytosol;membrane;ribosome	protein binding;RNA binding;structural molecule activity	17	Ribosome	Peptide chain elongation; Eukaryotic Translation Termination; Viral mRNA Translation; L13a-mediated translational silencing of Ceruloplasmin expression; Nonsense Mediated Decay (NMD) independent of the Exon Junction Complex (EJC); Selenocysteine synthesis; Nonsense Mediated Decay (NMD) enhanced by the Exon Junction Complex (EJC); GTP hydrolysis and joining of the 60S ribosomal subunit; Major path…	Cytoplasmic Ribosomal Proteins		5.19513e+06	4.66822e+06	3.39993e+06	1557918	2.34756e+06	2.25675e+06	3.68415e+06	1.1532e+06	3.21185e+06	3.36262e+06	2.06317e+06	1.47028e+06		22.3087	22.1544	21.6971	20.5712	21.1627	21.1058	21.8129	20.1372	21.615	21.6812	20.9764	20.4877		3.16237	2.8709	2.41069	2.35089	2.40606	2.30512	2.76869	2.11699	2.95843	2.70495	2.2298	2.47997
P16615	Sarcoplasmic/endoplasmic reticulum calcium ATPase 2	ATP2A2		cell organization and biogenesis;cellular homeostasis;regulation of biological process;response to stimulus;transport	endoplasmic reticulum;membrane	catalytic activity;metal ion binding;nucleotide binding;protein binding;transporter activity	12	Arrhythmogenic right ventricular cardiomyopathy (ARVC); Dilated cardiomyopathy; cGMP-PKG signaling pathway; Thyroid hormone signaling pathway; Adrenergic signaling in cardiomyocytes; Pancreatic secretion; Alzheimer's disease; Cardiac muscle contraction; cAMP signaling pathway; Calcium signaling pathway; Hypertrophic cardiomyopathy (HCM)	Ion homeostasis; Pre-NOTCH Processing in Golgi; Ion transport by P-type ATPases; Reduction of cytosolic Ca++ levels	Alzheimers Disease; Arrhythmogenic Right Ventricular Cardiomyopathy; Endothelin Pathways; Myometrial Relaxation and Contraction Pathways; Calcium Regulation in the Cardiac Cell		2.67751e+06	3.12648e+06	4.05019e+06	834791	1.68884e+06	2.36392e+06	1.87675e+06	515898	1.11626e+06	1.73659e+06	1.78534e+06	429489		21.3525	21.5761	21.9496	19.6711	20.6876	21.1727	20.8398	18.9767	20.0902	20.7278	20.7678	18.7123		2.2061	2.29257	2.66317	1.45076	1.93093	2.37205	1.7956	0.956505	1.4337	1.75162	2.02113	0.70458
Q9HD33	39S ribosomal protein L47, mitochondrial	MRPL47		cell organization and biogenesis;metabolic process	membrane;mitochondrion;ribosome	structural molecule activity	3		Mitochondrial translation initiation; Mitochondrial translation elongation; Mitochondrial translation termination			594849	939968	777550	303843	462772	464544	606928	200323	534583	675483	584596	329709		19.1822	19.8423	19.5686	18.213	18.8199	18.8255	19.2112	17.612	19.0281	19.3656	19.1571	18.3308		0.0358006	0.558712	0.282189	-0.00733203	0.0632661	0.0247599	0.16696	-0.408255	0.371514	0.389354	0.41045	0.323149
P42167	Lamina-associated polypeptide 2, isoforms beta/gamma	TMPO		regulation of biological process	chromosome;cytoplasm;membrane;nucleus	DNA binding;protein binding	12		Depolymerisation of the Nuclear Lamina; Initiation of Nuclear Envelope Reformation; Clearance of Nuclear Envelope Membranes from Chromatin			1.58223e+06	2.81065e+06	2.41113e+06	318149	1.03377e+06	840595	1.57884e+06	262702	1.0743e+06	1.08519e+06	1.77517e+06	327330		20.5935	21.4225	21.2013	18.2793	19.9795	19.6811	20.5904	18.0031	20.035	20.0495	20.7595	18.3204		1.44717	2.13894	1.91489	0.0590453	1.22282	0.880355	1.54623	-0.0171549	1.37843	1.07331	2.01289	0.312703
Q96A33	Coiled-coil domain-containing protein 47	CCDC47		cell differentiation;cell organization and biogenesis;metabolic process;regulation of biological process;response to stimulus	endoplasmic reticulum;membrane	metal ion binding;protein binding;RNA binding	17					151798	87229.7	201564	9200.35	61201.5	75243.5	45898.2			23566.1	45606.9			17.2118	16.4125	17.6209	13.1675	15.9013	16.1993	15.4861			14.5244	15.477			-1.93457	-2.87101	-1.66551	-5.05283	-2.8554	-2.60142	-3.55806			-4.45178	-3.26967
P05023	Sodium/potassium-transporting ATPase subunit alpha-1	ATP1A1		cell communication;cellular homeostasis;metabolic process;regulation of biological process;response to stimulus;transport	endoplasmic reticulum;endosome;Golgi;membrane	catalytic activity;metal ion binding;nucleotide binding;protein binding;transporter activity	1	Bile secretion; cGMP-PKG signaling pathway; Endocrine and other factor-regulated calcium reabsorption; Protein digestion and absorption; Proximal tubule bicarbonate reclamation; Thyroid hormone signaling pathway; Insulin secretion; Adrenergic signaling in cardiomyocytes; Thyroid hormone synthesis; Pancreatic secretion; Aldosterone-regulated sodium reabsorption; Carbohydrate digestion and absorpti…	Ion homeostasis; Ion transport by P-type ATPases	Preimplantation Embryo		4.05059e+06	6.07051e+06	5.62268e+06	2.11854e+06	3.43165e+06	3.06704e+06	3.76878e+06	1.60551e+06	4.0147e+06	4.30277e+06	4.23328e+06	2.0516e+06		21.9497	22.5334	22.4228	21.0146	21.7105	21.5484	21.8457	20.6146	21.9369	22.0368	22.0133	20.9683		2.80334	3.24985	3.13644	2.79434	2.95379	2.74772	2.80146	2.59438	3.28032	3.06063	3.26671	2.96064
P17600	Synapsin-1	SYN1		cell communication;cell organization and biogenesis;regulation of biological process;transport	cytosol;Golgi;membrane	catalytic activity;nucleotide binding;protein binding;transporter activity	X		Serotonin Neurotransmitter Release Cycle; Dopamine Neurotransmitter Release Cycle	Synaptic Vesicle Pathway; Brain-Derived Neurotrophic Factor (BDNF) signaling pathway; Monoamine Transport		173305	199923	243492	71552.9	96709.5	128929	130028	75145.6	102374	86154.4	80607.4	93832.5		17.403	17.6091	17.8935	16.1267	16.5614	16.9762	16.9885	16.1974	16.6435	16.3946	16.2986	16.5178		-1.74341	-1.67446	-1.39287	-2.09358	-2.19531	-1.82448	-2.05575	-1.82282	-2.01306	-2.58157	-2.44801	-1.48988
Q9Y6W5	Wiskott-Aldrich syndrome protein family member 2	WASF2		cell organization and biogenesis;cellular component movement;regulation of biological process;response to stimulus;transport	cytoplasm;cytoskeleton;cytosol;endosome	protein binding	1	Choline metabolism in cancer; Salmonella infection; Adherens junction; Regulation of actin cytoskeleton; Bacterial invasion of epithelial cells; Fc gamma R-mediated phagocytosis; Shigellosis	Regulation of actin dynamics for phagocytic cup formation; VEGFA-VEGFR2 Pathway; RHO GTPases Activate WASPs and WAVEs	Regulation of Actin Cytoskeleton		155122	126514	185999	138688		163076	141780	103026	145762	163622	120306	83922.8		17.243	16.9489	17.5049	17.0815		17.3152	17.1133	16.6526	17.1533	17.32	16.8764	16.3568		-1.90332	-2.3346	-1.78145	-1.13881		-1.48551	-1.93091	-1.36757	-1.50328	-1.6562	-1.87028	-1.65091
Q5QJE6	Deoxynucleotidyltransferase terminal-interacting protein 2	DNTTIP2		metabolic process;regulation of biological process	nucleus	RNA binding	1					2.19162e+06	1.85873e+06	2.02079e+06	930743	1.32717e+06	1.21452e+06	1.41765e+06	809472	1.41953e+06	1.74656e+06	1.4223e+06	790008		21.0636	20.8259	20.9465	19.828	20.3399	20.212	20.4351	19.6266	20.437	20.7361	20.4398	19.5915		1.91721	1.54235	1.6601	1.60772	1.58325	1.41126	1.39086	1.6064	1.78045	1.75988	1.69317	1.58383
Q6IAN0	Dehydrogenase/reductase SDR family member 7B	DHRS7B		metabolic process	endoplasmic reticulum;membrane	catalytic activity	17					81464.1	102845	135197		31932	54076.6	62712.8			53745.7	42072			16.3139	16.6501	17.0447		14.9627	15.7227	15.9365			15.7139	15.3606			-2.83249	-2.63342	-2.24168		-3.79396	-3.07798	-3.10773			-3.26234	-3.38606
O43493	Trans-Golgi network integral membrane protein 2											107244	122470	120432	53796	72760.1	77068.8	74938.9	48984.7	81748.7	75623.7	91060.9	49240.8		16.7105	16.9021	16.8779	15.7152	16.1509	16.2339	16.1934	15.58	16.3189	16.2066	16.4745	15.5876		-2.43583	-2.38148	-2.40853	-2.50509	-2.60582	-2.56684	-2.85078	-2.44018	-2.33763	-2.76965	-2.27209	-2.42012
O95292	Vesicle-associated membrane protein-associated protein B/C	VAPB		cell organization and biogenesis;cellular homeostasis;metabolic process;regulation of biological process;response to stimulus;transport	cytoplasm;endoplasmic reticulum;Golgi;membrane	protein binding	20		Sphingolipid de novo biosynthesis			514345	407571	768284	83943.8	285883	335632	227794	66534.5	168967	218778	206149	106036		18.9724	18.6367	19.5513	16.3571	18.1251	18.3565	17.7974	16.0218	17.3664	17.7391	17.6533	16.6942		-0.173987	-0.646847	0.264893	-1.86316	-0.631607	-0.444177	-1.24683	-1.99841	-1.29015	-1.2371	-1.0933	-1.31349
P20340	Ras-related protein Rab-6A	RAB6A		cellular component movement;metabolic process;regulation of biological process;response to stimulus;transport	cytosol;Golgi;membrane	catalytic activity;nucleotide binding;protein binding	11		COPI-independent Golgi-to-ER retrograde traffic; TBC/RABGAPs; Neutrophil degranulation; Pre-NOTCH Processing in Golgi; Retrograde transport at the Trans-Golgi-Network; RAB GEFs exchange GTP for GDP on RABs; RAB geranylgeranylation			982664	1.03025e+06	1.27313e+06	170688	471188	660674	770081	91440.1	346348	564694	517502	165499		19.9063	19.9746	20.2799	17.381	18.8459	19.3336	19.5547	16.4805	18.4019	19.1071	18.9812	17.3365		0.759975	0.691018	0.993557	-0.839296	0.0892672	0.532884	0.510446	-1.53968	-0.254675	0.130905	0.234575	-0.671219
Q96HM7	PC-esterase domain-containing protein 1B	PCED1B				protein binding	12					264546	367445	360804	24048.2	102035	190990	279175		326738	296555	289812	119340		18.0132	18.4872	18.4609	14.5536	16.6387	17.5431	18.0908		18.3178	18.1779	18.1448	16.8647		-1.1332	-0.796369	-0.825529	-3.66666	-2.11797	-1.25756	-0.953393		-0.338765	-0.798264	-0.601871	-1.14296
Q12907	Vesicular integral-membrane protein VIP36	LMAN2		regulation of biological process;transport	cell surface;endoplasmic reticulum;Golgi;membrane	metal ion binding;protein binding	5	Protein processing in endoplasmic reticulum	Cargo concentration in the ER; COPII (Coat Protein 2) Mediated Vesicle Transport			411500	424887	754991	47423.7	212824	226171	270311	43086.9	103493	133099	174657	37213.2		18.6505	18.6967	19.5261	15.5333	17.6993	17.7871	18.0443	15.395	16.6592	17.0221	17.4142	15.1835		-0.495831	-0.586821	0.239713	-2.68698	-1.05737	-1.01364	-0.999942	-2.62526	-1.99737	-1.95407	-1.33247	-2.82415
O95793	Double-stranded RNA-binding protein Staufen homolog 1	STAU1		regulation of biological process;response to stimulus	cytoplasm;cytosol;endoplasmic reticulum;membrane	protein binding;RNA binding	20					198326	222326	154601	85899.9	133438	130329	179529	22403.5	111983	149849	110108	55833.5		17.5975	17.7623	17.2382	16.3904	17.0258	16.9918	17.4539	14.4514	16.7729	17.1931	16.7486	15.7688		-1.54885	-1.52122	-2.0482	-1.82993	-1.73087	-1.8089	-1.59035	-3.56879	-1.88361	-1.78306	-1.99808	-2.23884
Q9H0B6	Kinesin light chain 2	KLC2		cellular component movement;transport	cytoplasm;cytoskeleton;cytosol;membrane	catalytic activity;motor activity;protein binding	11	Salmonella infection	COPI-dependent Golgi-to-ER retrograde traffic; Kinesins; RHO GTPases activate KTN1; MHC class II antigen presentation				88484.7							80858.4	145875	104853				16.4331							16.3031	17.1544	16.678				-2.8504							-2.35343	-1.82183	-2.06862
P08779	Keratin, type I cytoskeletal 16	KRT16		cell death;cell differentiation;cell organization and biogenesis;cell proliferation;cellular component movement;defense response;regulation of biological process;response to stimulus	cytoskeleton;cytosol;nucleus	protein binding;structural molecule activity	17		Formation of the cornified envelope			171117	132884	130765	59760.2	84967.5	86642.7	100642	51483.2	73216.8	110482	63118.3	259469		17.3846	17.0198	16.9966	15.8669	16.3746	16.4028	16.6189	15.6518	16.1599	16.7535	15.9458	17.9852		-1.76174	-2.26374	-2.28977	-2.3534	-2.38205	-2.39791	-2.42533	-2.36841	-2.49665	-2.22275	-2.80086	-0.0224802
P82650	28S ribosomal protein S22, mitochondrial	MRPS22		cell organization and biogenesis;metabolic process	membrane;mitochondrion;ribosome	structural molecule activity	3		Mitochondrial translation initiation; Mitochondrial translation elongation; Mitochondrial translation termination			496866	425817	787532	154514	310965	387717	228518	140521	105223	230718	272475	89924.8		18.9225	18.6999	19.587	17.2374	18.2464	18.5646	17.8019	17.1004	16.6831	17.8158	18.0558	16.4564		-0.223864	-0.583665	0.300592	-0.982924	-0.510283	-0.23605	-1.24226	-0.919796	-1.97345	-1.16044	-0.690869	-1.55125
Q9BYD6	39S ribosomal protein L1, mitochondrial	MRPL1		cell organization and biogenesis;metabolic process	membrane;mitochondrion;ribosome	protein binding;RNA binding;structural molecule activity	4	Ribosome	Mitochondrial translation initiation; Mitochondrial translation elongation; Mitochondrial translation termination			81103.2	96433.4	341188	206927		226067	80625.3	117652		86215.4	322627	113416		16.3075	16.5572	18.3802	17.6588		17.7864	16.2989	16.8442		16.3957	18.2995	16.7913		-2.83889	-2.72629	-0.906179	-0.561537		-1.01431	-2.74526	-1.17606		-2.58055	-0.447123	-1.21641
O00483	Cytochrome c oxidase subunit NDUFA4	NDUFA4		metabolic process;transport	membrane;mitochondrion	catalytic activity;protein binding;transporter activity	7	Huntington's disease; Parkinson's disease; Alzheimer's disease; Oxidative phosphorylation; Non-alcoholic fatty liver disease (NAFLD); Metabolic pathways	TP53 Regulates Metabolic Genes; Respiratory electron transport	Electron Transport Chain; Oxidative phosphorylation		1.62755e+06	1.8641e+06	1.47034e+06	573147	1.02465e+06	947360	1.27489e+06	397053	1.14118e+06	1.25843e+06	1.14425e+06	561611		20.6343	20.8301	20.4877	19.1285	19.9667	19.8536	20.2819	18.599	20.1221	20.2632	20.126	19.0992		1.48791	1.54651	1.20134	0.908247	1.21003	1.05286	1.23773	0.578749	1.46556	1.28699	1.37934	1.09153
P10620	Microsomal glutathione S-transferase 1	MGST1		cell differentiation;cell organization and biogenesis;metabolic process;response to stimulus;transport	endoplasmic reticulum;membrane;mitochondrion;nucleus	antioxidant activity;catalytic activity;protein binding	12	Glutathione metabolism; Metabolism of xenobiotics by cytochrome P450; Drug metabolism - cytochrome P450; Chemical carcinogenesis; Platinum drug resistance	Glutathione conjugation; Neutrophil degranulation; Aflatoxin activation and detoxification	Aryl Hydrocarbon Receptor Pathway; Oxidative Stress; Metapathway biotransformation		4.47535e+06	5.45744e+06	4.63861e+06	384744	1.97299e+06	1.97195e+06	2.57513e+06	385180	2.43244e+06	3.88792e+06	1.14359e+06	450633		22.0936	22.3798	22.1453	18.5535	20.912	20.9112	21.2962	18.5552	21.214	21.8906	20.1251	18.7816		2.94721	3.09625	2.85887	0.333239	2.15528	2.1105	2.25201	0.534951	2.55743	2.91436	1.37851	0.773911
P61244	Protein max	MAX		cell communication;cell death;cell organization and biogenesis;metabolic process;regulation of biological process;response to stimulus	cytoplasm;nucleus	DNA binding;protein binding	14	MAPK signaling pathway; Pathways in cancer; Transcriptional misregulation in cancer; Small cell lung cancer	Cyclin E associated events during G1/S transition ; Transcription of E2F targets under negative control by DREAM complex; Cyclin A:Cdk2-associated events at S phase entry; Transcriptional Regulation by E2F6	B Cell Receptor Signaling Pathway; Pathways Affected in Adenoid Cystic Carcinoma; MAPK Signaling Pathway; p38 MAPK Signaling Pathway		346000	564471	493825		448583		489376				359988			18.4004	19.1065	18.9136		18.775		18.9006				18.4576			-0.745951	-0.177	-0.372746		0.0183406		-0.143622				-0.289044
Q13123	Protein Red	IK		metabolic process;regulation of biological process	chromosome;cytoplasm;cytoskeleton;nucleus;spliceosomal complex	protein binding	5					585703	1.52231e+06	852207	480705	619451	584327	601007	281568	531669	555324	606284	332535		19.1598	20.5378	19.7008	18.8748	19.2406	19.1564	19.197	18.1031	19.0202	19.083	19.2096	18.3431		0.0134477	1.25429	0.414458	0.654492	0.483955	0.35572	0.152817	0.0829019	0.36363	0.106764	0.463002	0.335465
O43795	Unconventional myosin-Ib	MYO1B		cell organization and biogenesis;cellular component movement;transport	cytoplasm;endosome;membrane	catalytic activity;motor activity;nucleotide binding;protein binding	2					3.92266e+06	3.57274e+06	4457208	2.59526e+06	2.59705e+06	2.67377e+06	2.59143e+06	1.89668e+06	2.89106e+06	2.94322e+06	2.77346e+06	1.9526e+06		21.9034	21.7686	22.0877	21.3074	21.3084	21.3504	21.3053	20.855	21.4632	21.489	21.4033	20.897		2.75704	2.48506	2.80132	3.08715	2.55177	2.54975	2.26111	2.83483	2.80663	2.51276	2.65662	2.88928
O60716	Catenin delta-1	CTNND1		cell organization and biogenesis;metabolic process;regulation of biological process;response to stimulus	cytoplasm;cytosol;membrane;nucleus	protein binding	11	Rap1 signaling pathway; Adherens junction; Leukocyte transendothelial migration	VEGFR2 mediated vascular permeability; Adherens junctions interactions; InlA-mediated entry of Listeria monocytogenes into host cells	VEGFA-VEGFR2 Signaling Pathway; Wnt Signaling Pathway and Pluripotency		726282	816646	956535	287007	400365	441924	811480	204396	619398	614324	575129	234979		19.4702	19.6394	19.8675	18.1307	18.611	18.7534	19.6302	17.641	19.2405	19.2286	19.1335	17.8422		0.323807	0.355811	0.581073	-0.0895754	-0.145718	-0.0472578	0.585992	-0.379213	0.583969	0.252436	0.386894	-0.165512
P17676	CCAAT/enhancer-binding protein beta	CEBPB		cell differentiation;cell proliferation;defense response;metabolic process;regulation of biological process;response to stimulus	cytoplasm;nucleus	DNA binding;protein binding	20	TNF signaling pathway; Tuberculosis; Transcriptional misregulation in cancer	Transcriptional regulation of white adipocyte differentiation; Senescence-Associated Secretory Phenotype (SASP)	Folate-Alcohol and Cancer Pathway; IL17 signaling pathway; Adipogenesis; Oncostatin M Signaling Pathway; Differentiation of white and brown adipocyte; Transcriptional activation by NRF2; Ovarian Infertility Genes; Transcription factor regulation in adipogenesis; Lung fibrosis; White fat cell differentiation; IL-4 Signaling Pathway; Exercise-induced Circadian Regulation; Senescence and Autophagy i…		919328	1.18244e+06	1.06125e+06	205692	409303	493200	886501	182627	439709	1.23125e+06	864230	385644		19.8102	20.1733	20.0173	17.6501	18.6428	18.9118	19.7578	17.4785	18.7462	20.2317	19.7211	18.5569		0.663858	0.889796	0.730949	-0.570172	-0.113866	0.111117	0.713558	-0.541681	0.08965	1.25549	0.974425	0.549227
Q9NPA0	ER membrane protein complex subunit 7	EMC7			membrane		15					257391	254566	145080	27202.7	93927.8	90501.9	169570	17598.8	56366.8	210655	86725.4	26014		17.9736	17.9577	17.1465	14.7315	16.5193	16.4657	17.3715	14.1032	15.7826	17.6845	16.4042	14.667		-1.17276	-1.32586	-2.1399	-3.48884	-2.23741	-2.33504	-1.67268	-3.91703	-2.87398	-1.29168	-2.34246	-3.34068
O00479	High mobility group nucleosome-binding domain-containing protein 4	HMGN4			chromosome;nucleus	DNA binding;protein binding	6					403895	100132	283928	222026	162451	138089	113733	114536	193247	231048	96056.5	97809		18.6236	16.6115	18.1152	17.7604	17.3096	17.0752	16.7953	16.8054	17.5601	17.8178	16.5516	16.5777		-0.522742	-2.67199	-1.17122	-0.459929	-1.44703	-1.72545	-2.24891	-1.21478	-1.09645	-1.15837	-2.19504	-1.43
Q9H2U1	ATP-dependent DNA/RNA helicase DHX36	DHX36		metabolic process;regulation of biological process;response to stimulus	chromosome;cytoplasm;cytosol;nucleus	catalytic activity;DNA binding;nucleotide binding;protein binding;RNA binding	3	RNA degradation	TRAF6 mediated IRF7 activation in TLR7/8 or 9 signaling; DEx/H-box helicases activate type I IFN and inflammatory cytokines production ; TRAF6 mediated IRF7 activation			77967.6	69128.6	79086.1	44902.5	90369.6	31116.1	51612.3	19301.5	83200	102069	57346	23223.5		16.2506	16.077	16.2711	15.4545	16.4635	14.9254	15.6554	14.2364	16.3443	16.6392	15.8074	14.5033		-2.89578	-3.20654	-3.01525	-2.76579	-2.29313	-3.87532	-3.38878	-3.7838	-2.31224	-2.33702	-2.93923	-3.50438
Q9Y6C9	Mitochondrial carrier homolog 2	MTCH2		regulation of biological process;transport	membrane;mitochondrion;nucleus		11					3.69679e+06	4.42201e+06	2.99437e+06	2.9464e+06	2.48486e+06	2.12355e+06	2.54339e+06	1.92965e+06	1.95603e+06	2.80881e+06	1.95932e+06	1.88792e+06		21.8178	22.0763	21.5138	21.4905	21.2447	21.018	21.2783	20.8799	20.8995	21.4215	20.9019	20.8484		2.67148	2.79273	2.22744	3.27022	2.48806	2.21735	2.23412	2.85968	2.24296	2.44532	2.15529	2.84068
Q9H0U9	Testis-specific Y-encoded-like protein 1	TSPYL1		cell organization and biogenesis	nucleus	protein binding	6			Sudden Infant Death Syndrome (SIDS) Susceptibility Pathways		312268	191634	234475	324145	89067.6	349243	112186	142990	179710	226396	162455	147549		18.2524	17.548	17.8391	18.3063	16.4426	18.4139	16.7755	17.1255	17.4553	17.7885	17.3097	17.1708		-0.893939	-1.73554	-1.44731	0.0859803	-2.31406	-0.386824	-2.26867	-0.894672	-1.20123	-1.18772	-1.43695	-0.836851
Q8WVX9	Fatty acyl-CoA reductase 1	FAR1		metabolic process	membrane;organelle lumen	catalytic activity	11	Peroxisome	Wax biosynthesis			216451	161760	218874	77451.3	56297.3	140311	182408	63790.4	97267.7	117447	107359	24296.7		17.7237	17.3035	17.7397	16.241	15.7808	17.0983	17.4768	15.9611	16.5697	16.8417	16.7121	14.5685		-1.42268	-1.98004	-1.54665	-1.9793	-2.9759	-1.70243	-1.5674	-2.05917	-2.08687	-2.13455	-2.03454	-3.43921
Q68CZ2	Tensin-3	TNS3		cellular component movement;regulation of biological process	cytosol	protein binding	7		MET interacts with TNS proteins			429481	478188	537961	228116	340003	331550	356099	161900	246966	324412	309677	142169		18.7122	18.8672	19.0371	17.7994	18.3752	18.3389	18.4419	17.3047	17.914	18.3075	18.2404	17.1172		-0.434129	-0.416321	-0.249243	-0.420893	-0.381488	-0.46183	-0.602284	-0.71548	-0.742585	-0.668737	-0.506225	-0.890434
P08559	Pyruvate dehydrogenase E1 component subunit alpha, somatic form, mitochondrial	PDHA1		metabolic process;regulation of biological process	mitochondrion;nucleus;organelle lumen	catalytic activity;protein binding	X	Citrate cycle (TCA cycle); HIF-1 signaling pathway; Central carbon metabolism in cancer; Carbon metabolism; Pyruvate metabolism; Glucagon signaling pathway; Glycolysis / Gluconeogenesis; Metabolic pathways	Regulation of pyruvate dehydrogenase (PDH) complex; Signaling by Retinoic Acid; Glyoxylate metabolism and glycine degradation	TCA Cycle and Deficiency of Pyruvate Dehydrogenase complex (PDHc); Amino Acid metabolism; Acetylcholine Synthesis; Glycolysis and Gluconeogenesis		113087	154296	173079	92486.4	81334.9	122176		110636	48390.5	77572.5	90135.1	55535.3		16.7871	17.2353	17.4011	16.497	16.3116	16.8986		16.7555	15.5624	16.2433	16.4598	15.7611		-2.35929	-2.0482	-1.88531	-1.72335	-2.44509	-1.90209		-1.26476	-3.0941	-2.73295	-2.28683	-2.24656
Q96DV4	39S ribosomal protein L38, mitochondrial	MRPL38		cell organization and biogenesis;metabolic process	membrane;mitochondrion;ribosome		17		Mitochondrial translation initiation; Mitochondrial translation elongation; Mitochondrial translation termination			686542	734146	930644	429639	516183	572890	585905	290550	405955	503470	388528	298556		19.389	19.4857	19.8279	18.7128	18.9775	19.1279	19.1603	18.1484	18.631	18.9415	18.5677	18.1876		0.242627	0.202168	0.541483	0.492466	0.220849	0.327204	0.116103	0.128205	-0.025578	-0.0346599	-0.178971	0.179961
P05114	Non-histone chromosomal protein HMG-14	HMGN1		cell organization and biogenesis;metabolic process;regulation of biological process;response to stimulus	chromosome;cytoplasm;nucleus	DNA binding;protein binding	21	Herpes simplex infection	Dual incision in TC-NER; Formation of TC-NER Pre-Incision Complex; Gap-filling DNA repair synthesis and ligation in TC-NER	ATM Signaling Network in Development and Disease; p38 MAPK Signaling Pathway		643262	280030	547010	335655	245886	414819	153460	266827	151441	160630	212865	249836		19.295	18.0952	19.0612	18.3566	17.9076	18.6621	17.2275	18.0255	17.2084	17.2934	17.6996	17.9306		0.148684	-1.18832	-0.22518	0.136319	-0.849045	-0.138572	-1.8167	0.00532485	-1.44815	-1.68283	-1.04705	-0.0770621
Q8N3U4	Cohesin subunit SA-2	STAG2		cell division;cell organization and biogenesis;regulation of biological process	chromosome;cytosol;membrane;nucleus	protein binding	X	Cell cycle	Meiotic synapsis; Separation of Sister Chromatids; Resolution of Sister Chromatid Cohesion; Cohesin Loading onto Chromatin; Establishment of Sister Chromatid Cohesion; SUMOylation of DNA damage response and repair proteins			162784	325902	138451	72111.4	105313	107987	176369	41842.6	49335.6	117785	120920	55096.7		17.3126	18.3141	17.079	16.1379	16.6843	16.7205	17.4282	15.3527	15.5903	16.8458	16.8837	15.7497		-1.83377	-0.969463	-2.20737	-2.08236	-2.07235	-2.0802	-1.61597	-2.66754	-3.0662	-2.13041	-1.86293	-2.258
Q14157	Ubiquitin-associated protein 2-like	UBAP2L		regulation of biological process	cytoplasm	protein binding;RNA binding	1					72358.5	106128	261053	83256.4	180536	268470			2.24987e+06	3.26191e+06	2.32978e+06	1.25113e+06		16.1429	16.6954	17.994	16.3453	17.4619	18.0344			21.1014	21.6373	21.1518	20.2548		-3.00349	-2.5881	-1.2924	-1.87503	-1.29475	-0.766296			2.44487	2.66108	2.40513	2.24712
Q8IXI1	Mitochondrial Rho GTPase 2	RHOT2		cell organization and biogenesis;cellular component movement;cellular homeostasis;regulation of biological process;response to stimulus;transport	cytosol;membrane;mitochondrion	catalytic activity;metal ion binding;nucleotide binding;protein binding	16		Rho GTPase cycle			1.81938e+06	1.95714e+06	1.98199e+06	1.06768e+06	1.03897e+06	1.38349e+06	1.56911e+06	827625	1.43465e+06	2.06819e+06	1.44617e+06	845489		20.795	20.9003	20.9185	20.026	19.9867	20.3999	20.5815	19.6586	20.4523	20.9799	20.4638	19.6894		1.64865	1.61678	1.63213	1.80575	1.23004	1.59919	1.53731	1.6384	1.79573	2.00373	1.71718	1.68174
Q53H12	Acylglycerol kinase, mitochondrial	AGK		cell organization and biogenesis;metabolic process;transport	cytosol;membrane;mitochondrion	catalytic activity;nucleotide binding	7	Glycerolipid metabolism; Metabolic pathways	Signaling by BRAF and RAF fusions; Glycerophospholipid biosynthesis			977839	1.22755e+06	1.15716e+06	460355	600430	807433	766280	421207	818871	1.07944e+06	764345	538823		19.8992	20.2274	20.1422	18.8124	19.1956	19.623	19.5475	18.6842	19.6433	20.0418	19.5439	19.0395		0.752874	0.943811	0.855766	0.592088	0.438962	0.822288	0.503307	0.663949	0.986738	1.06564	0.797233	1.03177
P25705	ATP synthase subunit alpha, mitochondrial	ATP5A1		cell organization and biogenesis;metabolic process;regulation of biological process;transport	membrane;mitochondrion;organelle lumen	catalytic activity;nucleotide binding;protein binding;RNA binding;transporter activity	18	Huntington's disease; Parkinson's disease; Alzheimer's disease; Oxidative phosphorylation; Metabolic pathways	Cristae formation; Mitochondrial protein import; Formation of ATP by chemiosmotic coupling; Metabolism of proteins	Electron Transport Chain; Oxidative phosphorylation		1.53301e+07	2.07389e+07	1.44993e+07	3.28332e+06	6.7579e+06	8.49099e+06	1.48109e+07	2.4103e+06	6.32596e+06	8.67379e+06	7.46438e+06	2.30655e+06		23.8699	24.3058	23.7895	21.6467	22.6881	23.0175	23.8202	21.2008	22.5929	23.0482	22.8316	21.1373		4.7235	5.0223	4.50309	3.42642	3.93147	4.21681	4.77595	3.18056	3.93631	4.07203	4.08496	3.12962
P00367	Glutamate dehydrogenase 1, mitochondrial	GLUD1		cell organization and biogenesis;metabolic process;regulation of biological process	cytoplasm;mitochondrion;organelle lumen	catalytic activity;nucleotide binding;protein binding	10	Arginine biosynthesis; Carbon metabolism; Proximal tubule bicarbonate reclamation; Alanine, aspartate and glutamate metabolism; Nitrogen metabolism; Metabolic pathways; D-Glutamine and D-glutamate metabolism	Transcriptional activation of mitochondrial biogenesis; Amino acid synthesis and interconversion (transamination)	Amino Acid metabolism; Urea cycle and metabolism of amino groups		205022	187617	207742	198769	95269.8	150590	113660	144276	97948.3	66099.9	81835.1	128739		17.6454	17.5174	17.6644	17.6007	16.5397	17.2003	16.7944	17.1385	16.5797	16.0124	16.3204	16.9741		-1.50094	-1.7661	-1.62195	-0.619566	-2.21694	-1.60042	-2.24984	-0.881754	-2.07681	-2.96384	-2.4262	-1.0336
P62070	Ras-related protein R-Ras2	RRAS2		cell differentiation;regulation of biological process;response to stimulus	endoplasmic reticulum;membrane	catalytic activity;nucleotide binding;protein binding	11	Tight junction; Phospholipase D signaling pathway; MAPK signaling pathway; HTLV-I infection; Proteoglycans in cancer; Regulation of actin cytoskeleton; Ras signaling pathway; cAMP signaling pathway		Regulation of Actin Cytoskeleton		582031	382209	750375	368904	303356	327192	332176	317179	265260	350102	346832	316104		19.1507	18.544	19.5173	18.4929	18.2107	18.3198	18.3416	18.2749	18.017	18.4174	18.4039	18.27		0.00437242	-0.739539	0.230867	0.272586	-0.546023	-0.48092	-0.702615	0.254714	-0.639491	-0.558788	-0.342755	0.262359
Q8N1F7	Nuclear pore complex protein Nup93	NUP93		cell organization and biogenesis;cellular component movement;metabolic process;regulation of biological process;response to stimulus;transport	membrane;nucleus	protein binding;structural molecule activity	16	RNA transport	Rev-mediated nuclear export of HIV RNA; ISG15 antiviral mechanism; NEP/NS2 Interacts with the Cellular Export Machinery; tRNA processing in the nucleus; Transcriptional regulation by small RNAs; Nuclear Pore Complex (NPC) Disassembly; Regulation of Glucokinase by Glucokinase Regulatory Protein; Vpr-mediated nuclear import of PICs; Regulation of HSF1-mediated heat shock response; snRNP Assembly; S…			4.64171e+06	4.31744e+06	4.35243e+06	1.68221e+06	2.69105e+06	2.81502e+06	2.98122e+06	1.55844e+06	3.22011e+06	3.8457e+06	2.32833e+06	1.39142e+06		22.1462	22.0417	22.0534	20.6819	21.3597	21.4247	21.5075	20.5717	21.6187	21.8748	21.1509	20.4081		2.99986	2.75821	2.767	2.46163	2.60306	2.62402	2.46326	2.55145	2.96214	2.89861	2.40423	2.40045
P01833	Polymeric immunoglobulin receptor	PIGR		cell organization and biogenesis;regulation of biological process;response to stimulus;transport	extracellular;membrane	receptor activity;signal transducer activity	1	Intestinal immune network for IgA production	Neutrophil degranulation			272775	339878	323334	150396	181332	218476	204070	136621	232005	261042	287643	166495		18.0574	18.3747	18.3027	17.1984	17.4683	17.7371	17.6387	17.0598	17.8238	17.9939	18.1339	17.3451		-1.08901	-0.90888	-0.98372	-1.0219	-1.2884	-1.06358	-1.4055	-0.960405	-0.832741	-0.982282	-0.612712	-0.662566
P51572	B-cell receptor-associated protein 31	BCAP31		cell death;cellular homeostasis;regulation of biological process;response to stimulus;transport	cytosol;endoplasmic reticulum;membrane;mitochondrion	protein binding	X	Protein processing in endoplasmic reticulum	Apoptotic cleavage of cellular proteins; Antigen Presentation: Folding, assembly and peptide loading of class I MHC			1.45287e+06	1.22682e+06	2.49851e+06	581285	822633	1.32938e+06	1.16516e+06	332020	519314	1.11234e+06	1.18767e+06	354440		20.4705	20.2265	21.2526	19.1489	19.6499	20.3423	20.1521	18.3409	18.9862	20.0852	20.1797	18.4352		1.32412	0.942948	1.96625	0.928587	0.893214	1.54163	1.10789	0.320688	0.329708	1.10896	1.43307	0.427497
Q9NX47	E3 ubiquitin-protein ligase MARCH5	MARCH5		metabolic process;regulation of biological process	endoplasmic reticulum;membrane;mitochondrion	catalytic activity;metal ion binding;protein binding	10						175402	102861				123311		58311.8	92799.8					17.4203	16.6503				16.9119		15.8315	16.5018					-1.86323	-2.63604				-2.13226		-2.82504	-2.47437
Q14562	ATP-dependent RNA helicase DHX8	DHX8		metabolic process	cytoplasm;nucleus;spliceosomal complex	catalytic activity;nucleotide binding;protein binding;RNA binding	17	Spliceosome		mRNA Processing		213581	403903	321976	180237	169359	204567	284517	104131	276161	298430	247322	125224		17.7044	18.6236	18.2966	17.4595	17.3697	17.6422	18.1182	16.668	18.0751	18.187	17.916	16.9342		-1.44194	-0.65989	-0.989791	-0.76076	-1.38695	-1.15848	-0.926051	-1.35219	-0.58139	-0.789173	-0.830601	-1.07353
P07197	Neurofilament medium polypeptide	NEFM		cell organization and biogenesis;metabolic process;regulation of biological process		protein binding;structural molecule activity	8	Amyotrophic lateral sclerosis (ALS)		Amyotrophic lateral sclerosis (ALS); Association Between Physico-Chemical Features and Toxicity Associated Pathways		205925	259916	441526	102276	138035	178726	235470	75416.9	111468	136557	153903	95416.5		17.6518	17.9877	18.7521	16.6421	17.0747	17.4474	17.8452	16.2026	16.7663	17.0591	17.2317	16.542		-1.4946	-1.29585	-0.534249	-1.57819	-1.682	-1.35331	-1.19902	-1.81762	-1.89027	-1.91706	-1.51497	-1.46573
P31930	Cytochrome b-c1 complex subunit 1, mitochondrial	UQCRC1		metabolic process;response to stimulus;transport	cytosol;membrane;mitochondrion	catalytic activity;metal ion binding;protein binding;transporter activity	3	Huntington's disease; Parkinson's disease; Alzheimer's disease; Oxidative phosphorylation; Non-alcoholic fatty liver disease (NAFLD); Metabolic pathways; Cardiac muscle contraction	Respiratory electron transport	Electron Transport Chain		8.28134e+06	9.30903e+06	7.36373e+06	4.19761e+06	5.04217e+06	5.98913e+06	5.47207e+06	3.52709e+06	4.40041e+06	6.6701e+06	4.49347e+06	3.20153e+06		22.9814	23.1502	22.812	22.0011	22.2656	22.5139	22.3837	21.75	22.0692	22.6693	22.0994	21.6103		3.83507	3.86666	3.52562	3.78084	3.50894	3.71322	3.33945	3.72982	3.41267	3.69307	3.35277	3.60265
Q14331	Protein FRG1	FRG1		metabolic process	cytoplasm;nucleus;spliceosomal complex	protein binding;RNA binding	4; CHR_HG2023_PATCH; CHR_HSCHR4_11_CTG12; CHR_HSCHR4_6_CTG12					103267	212901	109402	66522.4	93233.7	63307.9	133686	35496.9	137385	220865	124523	50981.7		16.656	17.6998	16.7393	16.0216	16.5086	15.9501	17.0285	15.1154	17.0679	17.7528	16.9261	15.6377		-2.49035	-1.58372	-2.54711	-2.19875	-2.24811	-2.8506	-2.01572	-2.90482	-1.58867	-1.2234	-1.82058	-2.36999
Q96MU7	YTH domain-containing protein 1	YTHDC1		cell organization and biogenesis;metabolic process;regulation of biological process	membrane;nucleus	protein binding;RNA binding	4; CHR_HSCHR4_1_CTG9					1.29954e+06	1.91667e+06	1.57318e+06	674608	1.03859e+06	985347	1.17657e+06	543084	1.33358e+06	1408677	1.03654e+06	756619		20.3096	20.8702	20.5852	19.3637	19.9862	19.9103	20.1662	19.0508	20.3469	20.4259	19.9833	19.5292		1.16321	1.58663	1.29886	1.14339	1.22952	1.10958	1.12195	1.03059	1.69034	1.4497	1.23671	1.52152
P30048	Thioredoxin-dependent peroxide reductase, mitochondrial	PRDX3		cell death;cell differentiation;cell organization and biogenesis;cellular homeostasis;metabolic process;regulation of biological process;response to stimulus	cytoplasm;cytosol;endosome;mitochondrion;organelle lumen	antioxidant activity;catalytic activity;enzyme regulator activity;protein binding	10		Detoxification of Reactive Oxygen Species	Selenium Micronutrient Network		156655	185084	88425	69056.8	56512.5	84496.8	107838	61189.4	40414	78601.6	64460.3	75796.3		17.2572	17.4978	16.4322	16.0755	15.7863	16.3666	16.7185	15.901	15.3026	16.2623	15.9761	16.2098		-1.88913	-1.78572	-2.85422	-2.1448	-2.97039	-2.43409	-2.3257	-2.11923	-3.35397	-2.71393	-2.77051	-1.79784
P25205	DNA replication licensing factor MCM3	MCM3		metabolic process	cytoplasm;membrane;nucleus	catalytic activity;DNA binding;nucleotide binding;protein binding	6	DNA replication; Cell cycle	M/G1 Transition; Assembly of the pre-replicative complex; Unwinding of DNA; Regulation of DNA replication; Activation of ATR in response to replication stress; Activation of the pre-replicative complex; Orc1 removal from chromatin; Removal of licensing factors from origins	Cell Cycle; Retinoblastoma (RB) in Cancer; G1 to S cell cycle control; DNA Replication		159648	102281	150399	114997	66546.3	110797	110384	61618.1	109096	143958	64551.7	69648.8		17.2845	16.6422	17.1984	16.8112	16.0221	16.7576	16.7522	15.9111	16.7352	17.1353	15.9782	16.0878		-1.86183	-2.64137	-2.08795	-1.40907	-2.7346	-2.04313	-2.29204	-2.10915	-1.92131	-1.84092	-2.76846	-1.91987
P19404	NADH dehydrogenase [ubiquinone] flavoprotein 2, mitochondrial	NDUFV2		cell organization and biogenesis;metabolic process;transport	membrane;mitochondrion	catalytic activity;metal ion binding;protein binding	18	Huntington's disease; Parkinson's disease; Alzheimer's disease; Oxidative phosphorylation; Non-alcoholic fatty liver disease (NAFLD); Metabolic pathways	Complex I biogenesis	Electron Transport Chain; Oxidative phosphorylation		4.93457e+06	4.1139e+06	5.25782e+06	2.77639e+06	3.2368e+06	2.88181e+06	2.91282e+06	2.34553e+06	3.28974e+06	3.11415e+06	3.44936e+06	2.2004e+06		22.2345	21.9721	22.326	21.4048	21.6261	21.4585	21.474	21.1615	21.6495	21.5704	21.7179	21.0693		3.08813	2.68853	3.03965	3.18448	2.86946	2.65785	2.42978	3.14126	2.993	2.5942	2.97127	3.06165
O94905	Erlin-2	ERLIN2		metabolic process;regulation of biological process;response to stimulus;transport	cytosol;endoplasmic reticulum;membrane	catalytic activity;protein binding	8		ABC-family proteins mediated transport; Defective CFTR causes cystic fibrosis; Signaling by plasma membrane FGFR1 fusions			781879	938491	665233	270293	429730	547068	584834	191560	350970	487412	398328	161092		19.5766	19.84	19.3435	18.0442	18.7131	19.0614	19.1577	17.5474	18.421	18.8948	18.6036	17.2975		0.430223	0.556443	0.0571146	-0.176134	-0.0436053	0.260665	0.113464	-0.472783	-0.235551	-0.0814237	-0.143032	-0.710154
Q9NZ01	Very-long-chain enoyl-CoA reductase	TECR		metabolic process	cytoplasm;endoplasmic reticulum;membrane;nucleus	catalytic activity;protein binding	19	Fatty acid elongation; Biosynthesis of unsaturated fatty acids; Fatty acid metabolism	Synthesis of very long-chain fatty acyl-CoAs			1.4022e+06	1.76174e+06	1.56616e+06	215573	675080	798070	1.22864e+06	150529	697391	844340	727432	263654		20.4193	20.7486	20.5788	17.7178	19.3647	19.6062	20.2286	17.1997	19.4116	19.6875	19.4725	18.0083		1.2729	1.46503	1.29241	-0.502484	0.608023	0.80546	1.18442	-0.82054	0.755068	0.71126	0.725822	0.000604068
Q9NRW3	DNA dC->dU-editing enzyme APOBEC-3C	APOBEC3C		defense response;metabolic process;regulation of biological process;response to stimulus	cytoplasm;nucleus	catalytic activity;metal ion binding;protein binding;RNA binding	22		Formation of the Editosome			97602.4	88464	68588	31782.5	56723.6	53100.2	62886	19465.8	55732	49490.6	38129.5			16.5746	16.4328	16.0657	14.9559	15.7917	15.6964	15.9405	14.2487	15.7662	15.5949	15.2186			-2.57173	-2.85074	-3.22072	-3.26435	-2.96501	-3.10427	-3.10375	-3.77157	-2.89032	-3.38134	-3.52801
Q14978	Nucleolar and coiled-body phosphoprotein 1	NOLC1		cell organization and biogenesis;metabolic process;regulation of biological process	cytoplasm;nucleus	nucleotide binding;protein binding;RNA binding	10					2.58724e+06	3.57532e+06	2.37315e+06	1.79108e+06	1.7548e+06	1.73524e+06	1.76518e+06	1.48336e+06	2.0591e+06	2.20334e+06	1.84556e+06	1.39534e+06		21.303	21.7696	21.1784	20.7724	20.7429	20.7267	20.7514	20.5004	20.9736	21.0713	20.8156	20.4122		2.15662	2.4861	1.89199	2.5521	1.9862	1.92601	1.70718	2.48022	2.31704	2.09506	2.069	2.4045
P06576	ATP synthase subunit beta, mitochondrial	ATP5B		cell differentiation;cell organization and biogenesis;cellular homeostasis;metabolic process;regulation of biological process;transport	cell surface;membrane;mitochondrion;nucleus;organelle lumen	catalytic activity;nucleotide binding;protein binding;transporter activity	12	Huntington's disease; Parkinson's disease; Alzheimer's disease; Oxidative phosphorylation; Metabolic pathways	Transcriptional activation of mitochondrial biogenesis; Cristae formation; Mitochondrial protein import; Formation of ATP by chemiosmotic coupling; Metabolism of proteins	Electron Transport Chain; Oxidative phosphorylation		6.24889e+06	2.2104e+07	7.65637e+06	2.19317e+06	4.30969e+06	4.22559e+06	1.07259e+07	1.46057e+06	4.10727e+06	7.14189e+06	6.35935e+06	1.16331e+06		22.5752	24.3978	22.8682	21.0646	22.0392	22.0107	23.3546	20.4781	21.9697	22.7679	22.6004	20.1498		3.42881	5.11426	3.58184	2.84428	3.28248	3.21002	4.3104	2.45788	3.31321	3.79167	3.85382	2.14212
P17568	NADH dehydrogenase [ubiquinone] 1 beta subcomplex subunit 7	NDUFB7		cell organization and biogenesis;metabolic process;transport	membrane;mitochondrion	catalytic activity	19	Huntington's disease; Parkinson's disease; Alzheimer's disease; Oxidative phosphorylation; Non-alcoholic fatty liver disease (NAFLD); Metabolic pathways	Complex I biogenesis	Electron Transport Chain; Oxidative phosphorylation		1.50721e+06	1.13558e+06	1.03224e+06	605086	616672	870612	798759	531686	853416	904593	750392	693330		20.5234	20.115	19.9774	19.2068	19.2341	19.7317	19.6074	19.0202	19.7029	19.7869	19.5173	19.4032		1.37708	0.831464	0.690964	0.986481	0.477469	0.930975	0.563196	0.999992	1.04635	0.810704	0.770654	1.3955
Q14160	Protein scribble homolog	SCRIB		cell communication;cell death;cell differentiation;cell organization and biogenesis;cell proliferation;cellular component movement;development;metabolic process;regulation of biological process;response to stimulus;transport	cytoplasm;membrane	catalytic activity;protein binding	8	Viral carcinogenesis; Hippo signaling pathway	Asymmetric localization of PCP proteins	Human Thyroid Stimulating Hormone (TSH) signaling pathway		515647	308529	718622	259623	256951	306571	385597	181574	232191	314426	355674	209276		18.976	18.235	19.4549	17.9861	17.9711	18.2259	18.5567	17.4702	17.825	18.2624	18.4402	17.675		-0.170338	-1.04849	0.168486	-0.234243	-0.78554	-0.574832	-0.487472	-0.550022	-0.831588	-0.713846	-0.306434	-0.332635
O95168	NADH dehydrogenase [ubiquinone] 1 beta subcomplex subunit 4	NDUFB4		cell organization and biogenesis;metabolic process;response to stimulus;transport	membrane;mitochondrion	catalytic activity	3	Huntington's disease; Parkinson's disease; Alzheimer's disease; Oxidative phosphorylation; Non-alcoholic fatty liver disease (NAFLD); Metabolic pathways	Complex I biogenesis	Electron Transport Chain; Oxidative phosphorylation		1.51499e+06	2.39645e+06	1.55791e+06	663787	804370	1.07866e+06	1.43534e+06	631431	1.1155e+06	1.68367e+06	1.07542e+06	718673		20.5309	21.1925	20.5712	19.3404	19.6175	20.0408	20.453	19.2683	20.0893	20.6832	20.0365	19.455		1.38452	1.90893	1.2848	1.12006	0.860824	1.24011	1.40876	1.24804	1.43272	1.70698	1.28984	1.44729
P61225	Ras-related protein Rap-2b	RAP2B		cell organization and biogenesis;regulation of biological process;response to stimulus;transport	cytosol;endosome;membrane	catalytic activity;nucleotide binding;protein binding	3		Neutrophil degranulation			2.29018e+06	2.19678e+06	1.55315e+06	1.29016e+06	1.52839e+06	1.1561e+06	1.01952e+06	1.02426e+06	1.48881e+06	1.09939e+06	909206	958806		21.127	21.067	20.5668	20.2991	20.5436	20.1408	19.9595	19.9661	20.5057	20.0683	19.7942	19.8709		1.98067	1.78342	1.28038	2.07882	1.7869	1.34014	0.915258	1.94592	1.84919	1.09206	1.04762	1.8632
Q9NUP9	Protein lin-7 homolog C	LIN7C		cell organization and biogenesis;transport	cytoplasm;membrane	protein binding	11		Dopamine Neurotransmitter Release Cycle; Neurexins and neuroligins			45745.2	55123.7	205126					71216.4			96590.4			15.4813	15.7504	17.6462					16.1199			16.5596			-3.66503	-3.53316	-1.64023					-1.9003			-2.18704
P04844	Dolichyl-diphosphooligosaccharide--protein glycosyltransferase subunit 2	RPN2		metabolic process;response to stimulus	endoplasmic reticulum;membrane	catalytic activity;protein binding	20	N-Glycan biosynthesis; Protein processing in endoplasmic reticulum; Metabolic pathways	Asparagine N-linked glycosylation; SRP-dependent cotranslational protein targeting to membrane	Proteasome Degradation		943060	1.27713e+06	1.10745e+06	38992.8	266544	501262	752762	38716.4	187379	456234	296049	42675.5		19.847	20.2845	20.0788	15.2509	18.024	18.9352	19.5218	15.2407	17.5156	18.7994	18.1755	15.3811		0.700628	1.00094	0.792424	-2.96938	-0.732662	0.13451	0.47763	-2.77956	-1.14094	-0.176792	-0.571154	-2.62656
P49257	Protein ERGIC-53	LMAN1		cell organization and biogenesis;coagulation;metabolic process;regulation of biological process;transport	endoplasmic reticulum;Golgi;membrane	metal ion binding;protein binding	18	Protein processing in endoplasmic reticulum	Cargo concentration in the ER; COPII (Coat Protein 2) Mediated Vesicle Transport	Complement and Coagulation Cascades		489487	864708	1.09451e+06	68404.8	289672	345362	476090	71658	263752	337090	317972	54727.3		18.9009	19.7219	20.0619	16.0618	18.1441	18.3977	18.8609	16.1288	18.0088	18.3628	18.2785	15.74		-0.245452	0.438314	0.77547	-2.15849	-0.612613	-0.402948	-0.183331	-1.89138	-0.647719	-0.613431	-0.468091	-2.26771
P62081	40S ribosomal protein S7	RPS7		cell organization and biogenesis;metabolic process;regulation of biological process;transport	cytoplasm;cytoskeleton;cytosol;membrane;nucleus;ribosome	protein binding;RNA binding;structural molecule activity	2	Ribosome	Peptide chain elongation; Eukaryotic Translation Termination; Viral mRNA Translation; Formation of the ternary complex, and subsequently, the 43S complex; L13a-mediated translational silencing of Ceruloplasmin expression; Selenocysteine synthesis; Nonsense Mediated Decay (NMD) independent of the Exon Junction Complex (EJC); Nonsense Mediated Decay (NMD) enhanced by the Exon Junction Complex (EJC)…	Cytoplasmic Ribosomal Proteins		1.22267e+06	922108	1.23063e+06	658687	833865	671326	679985	515443	452725	516366	499751	365988		20.2216	19.8146	20.231	19.3292	19.6695	19.3567	19.3751	18.9755	18.7883	18.978	18.9308	18.4814		1.07525	0.531036	0.944585	1.10893	0.912778	0.555958	0.330939	0.955232	0.131736	0.00182771	0.184218	0.473754
Q75N03	E3 ubiquitin-protein ligase Hakai	CBLL1		metabolic process;regulation of biological process	cytosol;nucleus	catalytic activity;metal ion binding;protein binding	7		InlA-mediated entry of Listeria monocytogenes into host cells			142662		174448				150928		100021	217732	168298	41540.5		17.1222		17.4124				17.2035		16.6099	17.7322	17.3607	15.3422		-2.02412		-1.87395				-1.84071		-2.04659	-1.24401	-1.38598	-2.66545
P82921	28S ribosomal protein S21, mitochondrial											175927	231996	284763	101598	130873	175010	187759	57113.6	124483	113335	172274	125062		17.4246	17.8237	18.1194	16.6325	16.9978	17.4171	17.5185	15.8015	16.9256	16.7902	17.3943	16.9323		-1.72174	-1.4598	-1.16698	-1.58779	-1.75886	-1.38361	-1.52568	-2.21867	-1.73095	-2.18597	-1.35228	-1.0754
Q9H0A0	RNA cytidine acetyltransferase	NAT10		metabolic process;regulation of biological process	membrane;nucleus	catalytic activity;nucleotide binding;protein binding;RNA binding	11	Ribosome biogenesis in eukaryotes	rRNA modification in the nucleus and cytosol	Metapathway biotransformation		2.02775e+06	2.39659e+06	2.47124e+06	1.34124e+06	2.3832e+06	1.30594e+06	1.52232e+06	644900	1.31175e+06	1.64628e+06	2.00699e+06	1.24998e+06		20.9514	21.1926	21.2368	20.3551	21.1845	20.3167	20.5378	19.2987	20.3231	20.6508	20.9366	20.2535		1.80508	1.90901	1.95042	2.13483	2.42779	1.51596	1.49364	1.27849	1.66652	1.67458	2.18997	2.24579
Q9Y3B3	Transmembrane emp24 domain-containing protein 7	TMED7; TMED7-TICAM2		transport	endoplasmic reticulum;Golgi;membrane		5		COPI-dependent Golgi-to-ER retrograde traffic; COPI-mediated anterograde transport	Regulation of toll-like receptor signaling pathway		537774	496958	625497	91105.1	286632	300966	401065	58605.5	202444	258710	236847	37347.6		19.0366	18.9228	19.2546	16.4752	18.1288	18.1992	18.6135	15.8387	17.6272	17.981	17.8536	15.1887		-0.109721	-0.360774	-0.0317419	-1.74506	-0.627833	-0.601456	-0.43073	-2.18147	-1.02937	-0.99523	-0.893032	-2.81895
Q9Y3B2	Exosome complex component CSL4	EXOSC1		metabolic process;regulation of biological process	cytoplasm;cytosol;nucleus	catalytic activity;protein binding;RNA binding	10	RNA degradation	Major pathway of rRNA processing in the nucleolus and cytosol; mRNA decay by 3' to 5' exoribonuclease; ATF4 activates genes; Butyrate Response Factor 1 (BRF1) binds and destabilizes mRNA; Tristetraprolin (TTP, ZFP36) binds and destabilizes mRNA; KSRP (KHSRP) binds and destabilizes mRNA			402175	418137	414025	224723	314700	269382	331478	152591	277179	334119	293667	175005		18.6175	18.6736	18.6594	17.7778	18.2636	18.0393	18.3386	17.2193	18.0805	18.35	18.1638	17.417		-0.528899	-0.609923	-0.627026	-0.442512	-0.493057	-0.7614	-0.70565	-0.800913	-0.576081	-0.626203	-0.582811	-0.590645
Q08722	Leukocyte surface antigen CD47	CD47		cell organization and biogenesis;cellular component movement;regulation of biological process;response to stimulus;transport	membrane	protein binding;receptor activity;signal transducer activity	3	ECM-receptor interaction	Integrin cell surface interactions; Neutrophil degranulation; Cell surface interactions at the vascular wall; Signal regulatory protein family interactions	Spinal Cord Injury		456364	544701	757830	437831	356791	353096	428818	305907	237940	285772	460896	255118		18.7998	19.0551	19.5315	18.74	18.4447	18.4297	18.71	18.2227	17.8602	18.1245	18.8141	17.9608		-0.346538	-0.228436	0.245129	0.519714	-0.311955	-0.370995	-0.334199	0.202513	-0.796301	-0.851701	0.0674513	-0.0468803
Q02809	Procollagen-lysine,2-oxoglutarate 5-dioxygenase 1	PLOD1		metabolic process;response to stimulus	endoplasmic reticulum;membrane	catalytic activity;metal ion binding;protein binding	1	Lysine degradation	Collagen biosynthesis and modifying enzymes			75903.3	139300	137357	78250.6	54833.2	97304.4	129243	28219.2	48022	79992.1	90236.6	25638.3		16.2119	17.0878	17.0676	16.2558	15.7428	16.5702	16.9797	14.7844	15.5514	16.2876	16.4614	14.646		-2.93449	-2.19571	-2.21882	-1.96449	-3.01391	-2.23048	-2.06447	-3.23584	-3.10513	-2.68864	-2.28521	-3.36167
P10412	Histone H1.4	HIST1H1E		cell organization and biogenesis;metabolic process;regulation of biological process	chromosome;nucleus	DNA binding;metal ion binding;nucleotide binding;protein binding;RNA binding	6		Formation of Senescence-Associated Heterochromatin Foci (SAHF); Activation of DNA fragmentation factor	Pathways Affected in Adenoid Cystic Carcinoma		1.72813e+08	2.00782e+08	1.99703e+08	8.41806e+07	1.17754e+08	1.26241e+08	1.18065e+08	8.30908e+07	1.09223e+08	1.38052e+08	1.12313e+08	7.67737e+07		27.3646	27.5811	27.5733	26.327	26.8112	26.9116	26.815	26.3082	26.7027	27.0406	26.743	26.1941		8.21827	8.29751	8.28689	8.10668	8.05452	8.11091	7.7708	8.28796	8.04617	8.06443	7.99632	8.18643
P61764	Syntaxin-binding protein 1	STXBP1		cell communication;cell organization and biogenesis;regulation of biological process;response to stimulus;transport	cytoplasm;cytoskeleton;cytosol;membrane;mitochondrion;nucleus	protein binding;RNA binding	9	Synaptic vesicle cycle	Glutamate Neurotransmitter Release Cycle; Serotonin Neurotransmitter Release Cycle; Regulation of insulin secretion; Norepinephrine Neurotransmitter Release Cycle; Acetylcholine Neurotransmitter Release Cycle; Dopamine Neurotransmitter Release Cycle; Neurexins and neuroligins; GABA synthesis, release, reuptake and degradation	Synaptic Vesicle Pathway; EGF/EGFR Signaling Pathway; Insulin Signaling		636442	736463	598221	407989	381944	463429	449091	328789	451211	314917	342799	188135		19.2797	19.4903	19.1903	18.6382	18.543	18.822	18.7766	18.3268	18.7834	18.2646	18.387	17.5214		0.133306	0.206713	-0.0960679	0.417872	-0.213673	0.0212942	-0.267555	0.306582	0.126905	-0.711591	-0.359628	-0.486272
Q92887	Canalicular multispecific organic anion transporter 1	ABCC2		cellular homeostasis;metabolic process;response to stimulus;transport	cell surface;membrane	catalytic activity;nucleotide binding;protein binding;transporter activity	10	Bile secretion; Antifolate resistance; ABC transporters; Platinum drug resistance	ABC-family proteins mediated transport; Defective ABCC2 causes Dubin-Johnson syndrome	Codeine and Morphine Metabolism; Drug Induction of Bile Acid Pathway; Irinotecan Pathway; Constitutive Androstane Receptor Pathway; NRF2 pathway; Nuclear Receptors in Lipid Metabolism and Toxicity; Photodynamic therapy-induced NFE2L2 (NRF2) survival signaling		1.06209e+06	1.17523e+06	1.50756e+06	754094	729399	716517	715501	739593	1.33714e+06	1.268e+06	1.37845e+06	848970		20.0185	20.1645	20.5238	19.5244	19.4763	19.4506	19.4486	19.4964	20.3507	20.2741	20.3946	19.6954		0.872117	0.880977	1.2374	1.30409	0.719673	0.649945	0.404389	1.47615	1.69418	1.29792	1.64798	1.68767
E9PRG8	Uncharacterized protein C11orf98											722665	510455	434260	253189	309170	329012	511060	161313	659829	836081	705628	373817		19.463	18.9614	18.7282	17.9499	18.238	18.3278	18.9631	17.2995	19.3317	19.6733	19.4285	18.512		0.316604	-0.322116	-0.558185	-0.270442	-0.518633	-0.472913	-0.0810711	-0.720715	0.675193	0.697078	0.681918	0.504291
Q12797	Aspartyl/asparaginyl beta-hydroxylase	ASPH		metabolic process;regulation of biological process;response to stimulus;transport	cytoplasm;endoplasmic reticulum;membrane;organelle lumen	catalytic activity;metal ion binding;protein binding;structural molecule activity	8		Ion homeostasis; Stimuli-sensing channels			502822	597788	799556	301766	246470	516142	326957	315320	256502	409568	401921	210320		18.9397	19.1893	19.6088	18.2031	17.9111	18.9774	18.3187	18.2665	17.9686	18.6437	18.6166	17.6822		-0.206675	-0.0942646	0.322454	-0.0172276	-0.84562	0.176714	-0.725464	0.246236	-0.687932	-0.33246	-0.130078	-0.325456
O60568	Multifunctional procollagen lysine hydroxylase and glycosyltransferase LH3	PLOD3		cell organization and biogenesis;metabolic process;response to stimulus	endoplasmic reticulum;Golgi;membrane	catalytic activity;metal ion binding;protein binding	7	Lysine degradation; Other types of O-glycan biosynthesis	Collagen biosynthesis and modifying enzymes			225431	158707	121891	69568.6	96974	142515	119569	31615	73828.9	95836.1	83559.2	28092.1		17.7823	17.276	16.8952	16.0861	16.5653	17.1208	16.8675	14.9483	16.1719	16.5483	16.3505	14.7779		-1.36404	-2.00753	-2.39115	-2.13415	-2.19136	-1.67994	-2.17672	-3.0719	-2.48464	-2.42792	-2.39612	-3.22981
Q96LW7	Caspase recruitment domain-containing protein 19	C9orf89; CARD19		regulation of biological process	cytosol;endoplasmic reticulum;membrane;mitochondrion;nucleus	protein binding	9					243421	287655	313463	171608	167617	168072	206070	148860	139617	244283	230088	120965		17.8931	18.134	18.2579	17.3888	17.3548	17.3587	17.6528	17.1836	17.0911	17.8982	17.8118	16.8842		-1.25327	-1.14956	-1.02845	-0.83154	-1.40187	-1.44198	-1.39143	-0.836622	-1.56543	-1.07801	-0.934803	-1.12345
Q7L2E3	ATP-dependent RNA helicase DHX30	DHX30		cell organization and biogenesis;metabolic process	cytoplasm;cytosol;mitochondrion	catalytic activity;nucleotide binding;protein binding;RNA binding	3					1.94103e+06	2.67242e+06	2.16307e+06	904514	1.42961e+06	1.28423e+06	1.58571e+06	882111	1.66987e+06	1.92022e+06	1.84693e+06	1.07885e+06		20.8884	21.3497	21.0446	19.7868	20.4472	20.2925	20.5967	19.7506	20.6713	20.8728	20.8167	20.0411		1.74202	2.06618	1.75826	1.56648	1.69051	1.49177	1.55249	1.73038	2.01476	1.89664	2.07007	2.03339
P49755	Transmembrane emp24 domain-containing protein 10	TMED10		cell organization and biogenesis;regulation of biological process;response to stimulus;transport	endoplasmic reticulum;Golgi;membrane	protein binding	14		COPI-dependent Golgi-to-ER retrograde traffic; Cargo concentration in the ER; COPII (Coat Protein 2) Mediated Vesicle Transport; COPI-mediated anterograde transport	mRNA Processing		2.23237e+06	2.51146e+06	2.62531e+06	303166	1.07526e+06	1.28399e+06	1.91199e+06	204605	843234	1.25153e+06	1.11215e+06	252931		21.0901	21.2601	21.3241	18.2097	20.0363	20.2922	20.8666	17.6425	19.6856	20.2553	20.0849	17.9484		1.94378	1.97655	2.03767	-0.0105501	1.27958	1.49151	1.82244	-0.377737	1.02903	1.27906	1.33829	-0.0592986
Q86WB0	Nuclear-interacting partner of ALK	ZC3HC1		cell division;metabolic process;regulation of biological process	membrane;nucleus	metal ion binding;protein binding	7					118619	120596	66827.2	54852.9	90479	67283.1	120965				124392	59523.9		16.856	16.8798	16.0281	15.7433	16.4653	16.038	16.8842				16.9245	15.8612		-2.29039	-2.40372	-3.25824	-2.47702	-2.29138	-2.76274	-2.15998				-1.82209	-2.1465
O43175	D-3-phosphoglycerate dehydrogenase	PHGDH		metabolic process	cytosol	catalytic activity;nucleotide binding	1	Carbon metabolism; Glycine, serine and threonine metabolism; Biosynthesis of amino acids; Metabolic pathways	Serine biosynthesis	Trans-sulfuration and one carbon metabolism		53537.3	60487	50265	64376	82587.1	65683.7			57249.8	57824.2	51600.8	40980.8		15.7083	15.8843	15.6173	15.9742	16.3336	16.0032			15.805	15.8194	15.6551	15.3227		-3.43811	-3.3992	-3.66912	-2.24607	-2.42305	-2.79745			-2.85156	-3.15682	-3.09153	-2.68502
P16298	Serine/threonine-protein phosphatase 2B catalytic subunit beta isoform	PPP3CB		cell differentiation;cell growth;cell proliferation;metabolic process;regulation of biological process;response to stimulus;transport	cytosol;membrane	catalytic activity;metal ion binding;protein binding	10	Dopaminergic synapse; Th1 and Th2 cell differentiation; T cell receptor signaling pathway; Osteoclast differentiation; Glutamatergic synapse; Amphetamine addiction; cGMP-PKG signaling pathway; Renin secretion; B cell receptor signaling pathway; VEGF signaling pathway; MAPK signaling pathway; Oxytocin signaling pathway; Natural killer cell mediated cytotoxicity; Long-term potentiation; Tuberculosi…	Signaling by GPCR; FCERI mediated Ca+2 mobilization; DARPP-32 events; ROBO receptors bind AKAP5; Ca2+ pathway; CLEC7A (Dectin-1) induces NFAT activation; Calcineurin activates NFAT	Physiological and Pathological Hypertrophy of the Heart; Energy Metabolism; MicroRNAs in cardiomyocyte hypertrophy; Alzheimers Disease; Amyotrophic lateral sclerosis (ALS); Initiation of transcription and translation elongation at the HIV-1 LTR; MAPK Signaling Pathway		59061.2	75969.1						22888.9				10586.5		15.8499	16.2131						14.4824				13.3699		-3.29644	-3.07041						-3.53786				-4.63774
Q7Z3K3	Pogo transposable element with ZNF domain	POGZ		cell division;cell organization and biogenesis	chromosome;cytoplasm;cytosol;nucleus	DNA binding;metal ion binding;protein binding	1					167265	193458	189788	24690.8	81279.4	68385.5	195763	16952.3	107394	179351	73217.6	25340.7		17.3518	17.5617	17.534	14.5917	16.3106	16.0614	17.5787	14.0492	16.7125	17.4524	16.1599	14.6292		-1.79459	-1.72188	-1.75236	-3.62862	-2.44607	-2.73929	-1.46546	-3.97103	-1.94399	-1.52378	-2.58673	-3.37851
O75781	Paralemmin-1	PALM		cell organization and biogenesis;cellular component movement;regulation of biological process;response to stimulus	cytoplasm;membrane;nucleus	protein binding	19					143072	89387.3	146921	90618.9	98802	77022.4	92904.5	48247.6	67592.1	81138.9	73097.8	55254.5		17.1264	16.4478	17.1647	16.4675	16.5923	16.233	16.5035	15.5582	16.0446	16.3081	16.1575	15.7538		-2.01998	-2.83576	-2.1217	-1.75278	-2.16442	-2.56771	-2.54074	-2.46205	-2.61197	-2.6681	-2.58909	-2.25388
Q12788	Transducin beta-like protein 3	TBL3		metabolic process	nucleus	protein binding;RNA binding	16	Ribosome biogenesis in eukaryotes	Major pathway of rRNA processing in the nucleolus and cytosol; rRNA modification in the nucleus and cytosol			1.9664e+06	2.82791e+06	2.3487e+06	908966	1.76594e+06	1.53349e+06	1.97619e+06	379917	953397	1.26663e+06	865944	459511		20.9071	21.4313	21.1634	19.7939	20.752	20.5484	20.9143	18.5353	19.8627	20.2726	19.7239	18.8097		1.76077	2.14777	1.87705	1.57357	1.99533	1.74769	1.87008	0.515102	1.20618	1.29636	0.977283	0.802057
Q9H3U1	Protein unc-45 homolog A	UNC45A		cell differentiation;development;metabolic process	cytoplasm;cytosol;Golgi;nucleus	protein binding	15					166436	113636	168599	111926	147702	19346.4	214325	65364.5	58515.3	26521.8	128223	14365.9		17.3446	16.7941	17.3632	16.7722	17.1723	14.2398	17.7094	15.9962	15.8365	14.6949	16.9683	13.8104		-1.80175	-2.48948	-1.92315	-1.44811	-1.58435	-4.56092	-1.33476	-2.024	-2.82001	-4.28132	-1.77833	-4.19732
P42766	60S ribosomal protein L35	RPL35		cell organization and biogenesis;metabolic process;transport	cytosol;membrane;ribosome	RNA binding;structural molecule activity	9	Ribosome	Peptide chain elongation; Eukaryotic Translation Termination; Viral mRNA Translation; L13a-mediated translational silencing of Ceruloplasmin expression; Nonsense Mediated Decay (NMD) independent of the Exon Junction Complex (EJC); Selenocysteine synthesis; Nonsense Mediated Decay (NMD) enhanced by the Exon Junction Complex (EJC); GTP hydrolysis and joining of the 60S ribosomal subunit; Major path…	Cytoplasmic Ribosomal Proteins		9.78348e+06	1.28548e+07	8.88692e+06	3.61254e+06	5.94721e+06	5.83718e+06	7.77059e+06	3.40334e+06	6.57852e+06	6.95576e+06	4.89341e+06	2.91904e+06		23.2219	23.6158	23.0833	21.7846	22.5038	22.4768	22.8896	21.6985	22.6493	22.7298	22.2224	21.4771		4.07555	4.33226	3.79687	3.56428	3.74711	3.67614	3.84539	3.6783	3.99279	3.75357	3.47578	3.46938
Q7LGA3	Heparan sulfate 2-O-sulfotransferase 1	HS2ST1		metabolic process	Golgi;membrane	catalytic activity	1	Glycosaminoglycan biosynthesis - heparan sulfate / heparin	HS-GAG biosynthesis	Metapathway biotransformation		153040	170575	188189	36652.9	87660.4	222685	109838		81352.1	172425	95392	15511.8		17.2235	17.38	17.5218	15.1616	16.4196	17.7646	16.745		16.3119	17.3956	16.5416	13.9211		-1.92282	-1.90349	-1.76456	-3.05866	-2.33704	-1.03605	-2.29919		-2.34465	-1.5806	-2.20505	-4.0866
Q9Y3A4	Ribosomal RNA-processing protein 7 homolog A	RRP7A		cell organization and biogenesis;metabolic process	cytoplasm	protein binding;RNA binding	22	Ribosome biogenesis in eukaryotes	Major pathway of rRNA processing in the nucleolus and cytosol; rRNA modification in the nucleus and cytosol			1.28972e+06	1.16507e+06	1.02949e+06	355376	695466	661714	942336	252048	793926	920907	631268	369102		20.2986	20.152	19.9735	18.439	19.4076	19.3358	19.8459	17.9433	19.5986	19.8127	19.2679	18.4937		1.15226	0.86845	0.68711	0.218686	0.650946	0.535153	0.801677	-0.0768816	0.942106	0.836491	0.521261	0.485977
Q9C0C2	182 kDa tankyrase-1-binding protein	TNKS1BP1		cell organization and biogenesis;metabolic process;regulation of biological process;response to stimulus	chromosome;cytoplasm;cytoskeleton;cytosol;nucleus	protein binding	11		TP53 regulates transcription of additional cell cycle genes whose exact role in the p53 pathway remain uncertain; Deadenylation of mRNA			114774	349042	325237	145797	130761	129368	413261	36821.7	177385	261632	285554	86231.4		16.8084	18.413	18.3111	17.1536	16.9966	16.9811	18.6567	15.1683	17.4365	17.9972	18.1234	16.3959		-2.33792	-0.8705	-0.975253	-1.0667	-1.7601	-1.81958	-0.387511	-2.85196	-1.22002	-0.979023	-0.623226	-1.61176
P12236	ADP/ATP translocase 3	SLC25A6		cell death;cell organization and biogenesis;regulation of biological process;response to stimulus;transport	membrane;mitochondrion;nucleus	protein binding;transporter activity	X|Y; X	cGMP-PKG signaling pathway; Huntington's disease; HTLV-I infection; Parkinson's disease; Influenza A; Calcium signaling pathway	Mitochondrial protein import; Regulation of insulin secretion; Vpr-mediated induction of apoptosis by mitochondrial outer membrane permeabilization; Influenza Virus Induced Apoptosis; Metabolism of proteins	Electron Transport Chain		4.96948e+06	1.53116e+07	2.07083e+07	5.49464e+06	5.69921e+06	6.47207e+06	7.93458e+06	4.78769e+06	5.62518e+06	8.03366e+06	6.13392e+06	4.32738e+06		22.2447	23.8681	24.3037	22.3896	22.4423	22.6258	22.9197	22.1909	22.4235	22.9376	22.5484	22.0451		3.0983	4.58458	5.01732	4.16929	3.68565	3.8251	3.87552	4.17068	3.76693	3.96142	3.80175	4.03738
O14646	Chromodomain-helicase-DNA-binding protein 1	CHD1		cell organization and biogenesis;metabolic process;regulation of biological process	cytoplasm;nucleus	catalytic activity;DNA binding;nucleotide binding;protein binding	5					417346	880138	519181	139141	251715	320884	284123	205255	306596	226856	235156	139171		18.6709	19.7474	18.9859	17.0862	17.9414	18.2917	18.1162	17.6471	18.226	17.7914	17.8433	17.0865		-0.47548	0.46383	-0.300509	-1.13411	-0.815241	-0.509004	-0.928048	-0.373165	-0.430561	-1.18479	-0.903369	-0.921186
Q5JTV8	Torsin-1A-interacting protein 1	TOR1AIP1		cell organization and biogenesis;regulation of biological process	membrane;nucleus	enzyme regulator activity;protein binding	1					1.13522e+06	1.87349e+06	1.64286e+06	343671	814496	856546	1.11101e+06	268154	710802	867091	862551	279857		20.1145	20.8373	20.6478	18.3907	19.6355	19.7082	20.0834	18.0327	19.4391	19.7258	19.7183	18.0943		0.968181	1.55376	1.36139	0.17037	0.878873	0.907476	1.03923	0.0124791	0.782549	0.749618	0.971619	0.0866458
Q96P16	Regulation of nuclear pre-mRNA domain-containing protein 1A	RPRD1A		metabolic process;regulation of biological process		protein binding	18		RNA polymerase II transcribes snRNA genes				108556		34434.6			102345		60829.3	67038.3					16.7281		15.0716			16.6431		15.8925	16.0327					-2.55546		-3.14873			-2.40112		-2.76406	-2.94351
Q9UM00	Calcium load-activated calcium channel											1.03966e+06	1.12543e+06	1.13061e+06	218722	527831	800380	904285	104368	440355	673699	550550	138175		19.9877	20.102	20.1087	17.7387	19.0097	19.6103	19.7864	16.6713	18.7483	19.3617	19.0705	17.0761		0.841313	0.818502	0.822289	-0.481563	0.253041	0.809631	0.742213	-1.3489	0.0917684	0.385539	0.323882	-0.931548
O75380	NADH dehydrogenase [ubiquinone] iron-sulfur protein 6, mitochondrial	NDUFS6		cell organization and biogenesis;metabolic process;transport	membrane;mitochondrion	catalytic activity	5	Huntington's disease; Parkinson's disease; Alzheimer's disease; Oxidative phosphorylation; Non-alcoholic fatty liver disease (NAFLD); Metabolic pathways	Complex I biogenesis	Electron Transport Chain; Oxidative phosphorylation		1.91391e+06	2.34943e+06	2.28952e+06	826572	1.13063e+06	1.58857e+06	1.29847e+06	865746	967155	2.271e+06	1.3388e+06	1.12495e+06		20.8681	21.1639	21.1266	19.6568	20.1087	20.5993	20.3084	19.7236	19.8834	21.1149	20.3525	20.1014		1.72173	1.88034	1.84022	1.43648	1.35202	1.7986	1.26418	1.70336	1.22685	2.13869	1.60588	2.09374
Q15070	Mitochondrial inner membrane protein OXA1L	OXA1L		cell organization and biogenesis;metabolic process;regulation of biological process	membrane;mitochondrion	protein binding	14	Protein export				1.70378e+06	1.28269e+06	1.76805e+06	933828	954046	1.17927e+06	1.10005e+06	690389	851687	1.10816e+06	960219	729707		20.7003	20.2907	20.7537	19.8328	19.8637	20.1695	20.0691	19.397	19.7	20.0797	19.873	19.477		1.55395	1.0072	1.46734	1.6125	1.10702	1.36877	1.02493	1.37683	1.04343	1.10353	1.12637	1.46928
Q9Y6M1	Insulin-like growth factor 2 mRNA-binding protein 2	IGF2BP2		regulation of biological process;transport	cytoplasm;cytoskeleton;cytosol;nucleus	protein binding;RNA binding;translation regulator activity	3		Insulin-like Growth Factor-2 mRNA Binding Proteins (IGF2BPs/IMPs/VICKZs) bind RNA			68917	151807	92201.8		53280.6	46837.1	65341.1				38804			16.0726	17.2119	16.4925		15.7013	15.5154	15.9957				15.2439			-3.07379	-2.07166	-2.79388		-3.05535	-3.28533	-3.0485				-3.50271
Q96T58	Msx2-interacting protein	SPEN		metabolic process;regulation of biological process;response to stimulus	nucleus	DNA binding;protein binding;RNA binding	1			Notch Signaling Pathway		371906	305606	303076	119404	209590	177033	265732	96601.7	190332	246411	155604	162685		18.5046	18.2213	18.2093	16.8655	17.6772	17.4337	18.0196	16.5598	17.5382	17.9107	17.2475	17.3117		-0.641786	-1.06222	-1.07707	-1.35481	-1.07946	-1.36704	-1.02459	-1.46046	-1.11838	-1.0655	-1.49911	-0.695957
Q9BRJ2	39S ribosomal protein L45, mitochondrial	MRPL45		cell organization and biogenesis;metabolic process	membrane;mitochondrion;ribosome	protein binding;RNA binding	17; CHR_HSCHR17_7_CTG4		Mitochondrial translation initiation; Mitochondrial translation elongation; Mitochondrial translation termination			486283	477271	603258	265335	295552	275101	669190	131434	338741	438457	358072	168120		18.8914	18.8644	19.2024	18.0175	18.1731	18.0696	19.3521	17.004	18.3698	18.7421	18.4499	17.3591		-0.254927	-0.41909	-0.0839706	-0.202846	-0.583622	-0.731096	0.307851	-1.01624	-0.286714	-0.234129	-0.296743	-0.648554
P78406	mRNA export factor	RAE1		cell division;cell organization and biogenesis;metabolic process;regulation of biological process;response to stimulus;transport	cytoplasm;cytoskeleton;nucleus	protein binding;RNA binding	20	RNA transport; Influenza A	Rev-mediated nuclear export of HIV RNA; ISG15 antiviral mechanism; NEP/NS2 Interacts with the Cellular Export Machinery; tRNA processing in the nucleus; Transcriptional regulation by small RNAs; Nuclear Pore Complex (NPC) Disassembly; Regulation of Glucokinase by Glucokinase Regulatory Protein; Vpr-mediated nuclear import of PICs; Regulation of HSF1-mediated heat shock response; snRNP Assembly; S…			821078	960293	972087	298946	597556	507188	846418	167581	734092	806814	550862	305631		19.6472	19.8731	19.8907	18.1895	19.1887	18.9522	19.691	17.3545	19.4856	19.6219	19.0713	18.2214		0.500797	0.589576	0.604339	-0.0307725	0.43204	0.151465	0.646806	-0.66572	0.829063	0.64567	0.324701	0.213747
P62873	Guanine nucleotide-binding protein G(I)/G(S)/G(T) subunit beta-1	GNB1		cell death;cell organization and biogenesis;cell proliferation;cellular homeostasis;metabolic process;regulation of biological process;response to stimulus	cytosol;membrane	catalytic activity;protein binding;signal transducer activity	1	Dopaminergic synapse; Serotonergic synapse; Phototransduction; Glutamatergic synapse; Olfactory transduction; Circadian entrainment; Morphine addiction; Pathways in cancer; Retrograde endocannabinoid signaling; GABAergic synapse; Alcoholism; Ras signaling pathway; Chemokine signaling pathway; Cholinergic synapse; PI3K-Akt signaling pathway	G alpha (z) signalling events; Activation of G protein gated Potassium channels; Cooperation of PDCL (PhLP1) and TRiC/CCT in G-protein beta folding; Glucagon-type ligand receptors; Thromboxane signalling through TP receptor; ADP signalling through P2Y purinoceptor 1; Olfactory Signaling Pathway; G beta:gamma signalling through PI3Kgamma; Vasopressin regulates renal water homeostasis via Aquaporin…	Nicotine Activity on Dopaminergic Neurons; Human Thyroid Stimulating Hormone (TSH) signaling pathway; Corticotropin-releasing hormone signaling pathway; Myometrial Relaxation and Contraction Pathways; G Protein Signaling Pathways; Chemokine signaling pathway; Focal Adhesion-PI3K-Akt-mTOR-signaling pathway; Calcium Regulation in the Cardiac Cell; Estrogen signaling pathway		547838	390658	516273	313106	258245	409203	342612	210047	369100	528008	306096	287468		19.0634	18.5755	18.9778	18.2563	17.9784	18.6425	18.3862	17.6804	18.4937	19.0102	18.2236	18.133		-0.082973	-0.707993	-0.308612	0.035993	-0.778295	-0.158237	-0.657989	-0.339871	-0.162887	0.0339952	-0.523005	0.12536
P22695	Cytochrome b-c1 complex subunit 2, mitochondrial	UQCRC2		metabolic process;transport	membrane;mitochondrion	catalytic activity;metal ion binding;protein binding	16; CHR_HG926_PATCH	Huntington's disease; Parkinson's disease; Alzheimer's disease; Oxidative phosphorylation; Non-alcoholic fatty liver disease (NAFLD); Metabolic pathways; Cardiac muscle contraction	Respiratory electron transport	Electron Transport Chain		7.83789e+06	7.98003e+06	8.25186e+06	5.06483e+06	4.7836e+06	5.87755e+06	5.44732e+06	4.08042e+06	3.82557e+06	5.06473e+06	4.56333e+06	3.51331e+06		22.902	22.928	22.9763	22.2721	22.1897	22.4868	22.3771	21.9603	21.8672	22.2721	22.1217	21.7444		3.75567	3.64442	3.6899	4.05178	3.43299	3.68609	3.33291	3.94006	3.2107	3.29585	3.37502	3.73672
Q9P035	Very-long-chain (3R)-3-hydroxyacyl-CoA dehydratase 3	PTPLAD1; HACD3		metabolic process;regulation of biological process;response to stimulus	cytosol;endoplasmic reticulum;membrane;mitochondrion	catalytic activity;enzyme regulator activity;protein binding	15	Fatty acid elongation; Biosynthesis of unsaturated fatty acids; Fatty acid metabolism	Synthesis of very long-chain fatty acyl-CoAs			1.53388e+06	1.58411e+06	1.90565e+06	385619	1.01138e+06	1.05288e+06	1.03684e+06	287881	654648	777238	757609	273016		20.5488	20.5952	20.8619	18.5568	19.9479	20.0059	19.9838	18.1351	19.3204	19.568	19.5311	18.0586		1.40239	1.31171	1.57547	0.336516	1.19121	1.20521	0.939563	0.114889	0.663821	0.591792	0.784463	0.0509448
Q9BRL6	Serine/arginine-rich splicing factor 8	SRSF8		metabolic process	cytosol;nucleus	protein binding;RNA binding	11	Spliceosome; Herpes simplex infection					152813	35418	14426.2	37828		38307.9		96382.1	36620.3	93794.8	15637.1			17.2214	15.1122	13.8164	15.2072		15.2254		16.5565	15.1604	16.5172	13.9327			-2.06213	-4.17419	-4.4039	-3.54951		-3.81885		-2.10006	-3.81585	-2.22941	-4.075
Q9UH17	DNA dC->dU-editing enzyme APOBEC-3B	APOBEC3B		defense response;regulation of biological process;response to stimulus	nucleus	catalytic activity;metal ion binding;RNA binding	22		Formation of the Editosome			149913	228470	100107	46156.9	101895	91096.2	66316.8	47230.2	134627	172302	67114.2	53895.7		17.1938	17.8016	16.6112	15.4943	16.6367	16.4751	16.0171	15.5274	17.0386	17.3946	16.0343	15.7179		-1.95259	-1.48189	-2.67521	-2.72604	-2.11995	-2.32559	-3.02712	-2.4928	-1.61793	-1.58162	-2.7123	-2.2898
Q99595	Mitochondrial import inner membrane translocase subunit Tim17-A	TIMM17A		transport	membrane;mitochondrion	transporter activity	1		Mitochondrial protein import; Metabolism of proteins			1.53395e+06	1.31316e+06	1.41723e+06	749839	927886	955339	1.18911e+06	565566	1.19091e+06	1.31164e+06	956925	667889		20.5488	20.3246	20.4346	19.5162	19.8236	19.8657	20.1815	19.1093	20.1836	20.3229	19.868	19.3492		1.40246	1.04107	1.14826	1.29592	1.06691	1.06496	1.13725	1.08911	1.52709	1.34674	1.12142	1.34157
Q9BVP2	Guanine nucleotide-binding protein-like 3	GNL3		cell division;cell proliferation;regulation of biological process	membrane;nucleus	catalytic activity;nucleotide binding;protein binding;RNA binding	3	Ribosome biogenesis in eukaryotes	Major pathway of rRNA processing in the nucleolus and cytosol			4.11855e+06	4.41063e+06	3.98066e+06	1.64222e+06	2.71691e+06	2.48487e+06	3.49948e+06	1.29458e+06	3.32523e+06	3.82279e+06	2.52555e+06	1.50928e+06		21.9737	22.0726	21.9246	20.6472	21.3735	21.2447	21.7387	20.3041	21.665	21.8662	21.2682	20.5254		2.82734	2.78901	2.63819	2.42691	2.61686	2.44404	2.6945	2.28383	3.00848	2.88999	2.52153	2.51775
O15525	Transcription factor MafG	MAFG		cellular homeostasis;coagulation;metabolic process;regulation of biological process;response to stimulus	nucleus	DNA binding;protein binding	17		Factors involved in megakaryocyte development and platelet production	Quercetin and Nf-kB/ AP-1 Induced Cell Apoptosis; NRF2 pathway		175843	219542	359950	386679	212961	228707	85419.2	177100	132589	331357	262433	215173		17.4239	17.7441	18.4574	18.5608	17.7002	17.8031	16.3823	17.4342	17.0166	18.338	18.0016	17.7151		-1.72244	-1.5394	-0.82895	0.340477	-1.05645	-0.997555	-2.66193	-0.586014	-1.63994	-0.638178	-0.745044	-0.292546
P61224	Ras-related protein Rap-1b	RAP1B		cell organization and biogenesis;cell proliferation;regulation of biological process;response to stimulus;transport	cytoplasm;cytosol;membrane	catalytic activity;nucleotide binding;protein binding	12	Neurotrophin signaling pathway; Rap1 signaling pathway; MAPK signaling pathway; Long-term potentiation; Renal cell carcinoma; Pancreatic secretion; Focal adhesion; Leukocyte transendothelial migration; Ras signaling pathway; Chemokine signaling pathway; cAMP signaling pathway; Platelet activation	Gene and protein expression by JAK-STAT signaling after Interleukin-12 stimulation; Signaling by BRAF and RAF fusions; MAP2K and MAPK activation; GRB2:SOS provides linkage to MAPK signaling for Integrins ; MET activates RAP1 and RAC1; Signaling by RAS mutants; Signaling by high-kinase activity BRAF mutants; Signaling by moderate kinase activity BRAF mutants; p130Cas linkage to MAPK signaling for …	Integrin-mediated Cell Adhesion; Human Thyroid Stimulating Hormone (TSH) signaling pathway; Corticotropin-releasing hormone signaling pathway; Common Pathways Underlying Drug Addiction; Focal Adhesion; Signaling of Hepatocyte Growth Factor Receptor; MAPK Signaling Pathway; VEGFA-VEGFR2 Signaling Pathway; Chemokine signaling pathway		2.18086e+06	1.33699e+06	2.18265e+06	942223	1.13783e+06	1.35328e+06	1.2953e+06	681364	859805	1.01856e+06	980225	687660		21.0565	20.3506	21.0576	19.8457	20.1179	20.368	20.3049	19.3781	19.7136	19.9581	19.9028	19.3913		1.91011	1.06701	1.77126	1.62541	1.36118	1.56733	1.26065	1.35784	1.05711	0.981893	1.15612	1.38365
P07237	Protein disulfide-isomerase	P4HB		cell organization and biogenesis;cellular homeostasis;metabolic process;regulation of biological process;response to stimulus	endoplasmic reticulum;extracellular;membrane;organelle lumen	catalytic activity;metal ion binding;protein binding;RNA binding	17	Protein processing in endoplasmic reticulum	Post-translational protein phosphorylation; Regulation of Insulin-like Growth Factor (IGF) transport and uptake by Insulin-like Growth Factor Binding Proteins (IGFBPs); VLDL assembly; Chylomicron assembly; Collagen biosynthesis and modifying enzymes; Interleukin-12 family signaling; Detoxification of Reactive Oxygen Species; Hedgehog ligand biogenesis			602853	713110	884583	542481	424766	537447	429500	430348	292386	450756	461128	382503		19.2014	19.4438	19.7546	19.0492	18.6963	19.0358	18.7123	18.7151	18.1575	18.782	18.8148	18.5451		0.0550847	0.160226	0.468252	0.828913	-0.0603677	0.235067	-0.331906	0.694923	-0.499027	-0.194219	0.0681776	0.53743
O95249	Golgi SNAP receptor complex member 1	GOSR1		cell organization and biogenesis;regulation of biological process;transport	cytosol;Golgi;membrane	protein binding	17	SNARE interactions in vesicular transport	COPI-mediated anterograde transport; Intra-Golgi traffic			169972	219698	203295	49112.4	102697	153369	128142	33255.3	94801.6	190145	143912	23140.8		17.3749	17.7452	17.6332	15.5838	16.648	17.2266	16.9674	15.0213	16.5326	17.5367	17.1348	14.4982		-1.77142	-1.53838	-1.65317	-2.6365	-2.10864	-1.57405	-2.07682	-2.99892	-2.12391	-1.43946	-1.61181	-3.50953
P62241	40S ribosomal protein S8	RPS8		cell organization and biogenesis;metabolic process;transport	cytoplasm;cytosol;endoplasmic reticulum;membrane;nucleus;ribosome	protein binding;RNA binding;structural molecule activity	1	Ribosome	Peptide chain elongation; Eukaryotic Translation Termination; Viral mRNA Translation; Formation of the ternary complex, and subsequently, the 43S complex; L13a-mediated translational silencing of Ceruloplasmin expression; Selenocysteine synthesis; Nonsense Mediated Decay (NMD) independent of the Exon Junction Complex (EJC); Nonsense Mediated Decay (NMD) enhanced by the Exon Junction Complex (EJC)…	Cytoplasmic Ribosomal Proteins		1.10496e+07	1.01738e+07	9.73099e+06	3.14135e+06	5.97683e+06	5.18043e+06	8.373e+06	2.95534e+06	5.9275e+06	7.56895e+06	5.81283e+06	3.1462e+06		23.3975	23.2784	23.2142	21.583	22.511	22.3046	22.9973	21.4949	22.499	22.8517	22.4708	21.5852		4.25113	3.99482	3.92777	3.36265	3.75428	3.50395	3.95311	3.47467	3.84245	3.87546	3.72418	3.57749
Q96EY7	Pentatricopeptide repeat domain-containing protein 3, mitochondrial	PTCD3		cell organization and biogenesis;metabolic process;regulation of biological process	cytosol;membrane;mitochondrion;ribosome	protein binding;RNA binding	2		Mitochondrial translation initiation; Mitochondrial translation elongation; Mitochondrial translation termination			176289	159110	209811	89115.4	99146	131414	160396	65367	75312.9	113849	102977	77138.2		17.4276	17.2797	17.6787	16.4434	16.5973	17.0038	17.2913	15.9963	16.2006	16.7968	16.652	16.2352		-1.71878	-2.00388	-1.60766	-1.77691	-2.15941	-1.79693	-1.75292	-2.02395	-2.45593	-2.17945	-2.09467	-1.77253
Q71UI9	Histone H2A.V	H2AFV		regulation of biological process	chromosome;nucleus	DNA binding;protein binding	7	Systemic lupus erythematosus; Alcoholism	SIRT1 negatively regulates rRNA expression; RMTs methylate histone arginines; Activation of anterior HOX genes in hindbrain development during early embryogenesis; NoRC negatively regulates rRNA expression; Meiotic synapsis; Transcriptional regulation by small RNAs; Meiotic recombination; PRC2 methylates histones and DNA; Formation of the beta-catenin:TCF transactivating complex; DNA methylation;…			1.78034e+07	2.45024e+07	2.20265e+07	3.81778e+06	7044305	8.71062e+06	1.69879e+07	6.09373e+06	8.00892e+06	1.53201e+07	9.88396e+06	6.67928e+06		24.0857	24.5464	24.3927	21.8643	22.748	23.0543	24.018	22.5389	22.9332	23.8689	23.2367	22.6713		4.93929	5.26288	5.10635	3.644	3.99135	4.25365	4.9738	4.51867	4.27664	4.89272	4.49003	4.66358
Q12860	Contactin-1	CNTN1		cell organization and biogenesis;regulation of biological process;response to stimulus	membrane	protein binding	12	Cell adhesion molecules (CAMs)	Activated NOTCH1 Transmits Signal to the Nucleus; NOTCH2 Activation and Transmission of Signal to the Nucleus; Neurofascin interactions			1.10357e+06	1.57832e+06	1.29538e+06	430576	649190	823565	1.03335e+06	409482	779185	1.17892e+06	978736	520963		20.0737	20.59	20.3049	18.7159	19.3083	19.6515	19.9789	18.6434	19.5716	20.169	19.9006	18.9908		0.927379	1.30642	1.01856	0.495609	0.551605	0.850826	0.934691	0.623219	0.915066	1.19283	1.15393	0.983138
Q12846	Syntaxin-4	STX4		cell organization and biogenesis;regulation of biological process;response to stimulus;transport	cell surface;cytoplasm;cytosol;endosome;membrane;vacuole	enzyme regulator activity;protein binding	16	Vasopressin-regulated water reabsorption; SNARE interactions in vesicular transport	Translocation of GLUT4 to the plasma membrane; Clathrin derived vesicle budding; Disinhibition of SNARE formation; ER-Phagosome pathway; Other interleukin signaling	Insulin Signaling		587487	538023	891383		267835	232775		150194	391634		538586	235266		19.1642	19.0373	19.7657		18.031	17.8286		17.1965	18.5791		19.0388	17.8439		0.0178344	-0.246233	0.4793		-0.72569	-0.972117		-0.823753	-0.0773914		0.292188	-0.163748
O43402	ER membrane protein complex subunit 8	EMC8			cytoplasm;cytosol;membrane;mitochondrion;nucleus	protein binding	16					552852	580568	650187	208976	363364	461831	359349	167163	225148	349575	304079	123021		19.0765	19.1471	19.3105	17.673	18.4711	18.817	18.455	17.3509	17.7805	18.4152	18.2141	16.9085		-0.0698302	-0.136435	0.0241085	-0.547321	-0.285619	0.0163103	-0.589181	-0.669329	-0.876028	-0.560963	-0.532542	-1.09914
Q99805	Transmembrane 9 superfamily member 2	TM9SF2		transport	endosome;membrane		13					197544	145211	204835		63143.1	99850	122704		36431.3	110055	80109.1	6876.29		17.5918	17.1478	17.6441		15.9463	16.6075	16.9048		15.1529	16.7479	16.2897	12.7474		-1.55455	-2.13575	-1.64228		-2.81034	-2.19322	-2.13938		-3.50365	-2.22834	-2.45695	-5.26027
P46939	Utrophin	UTRN		cell organization and biogenesis;regulation of biological process;response to stimulus	cytoplasm;cytoskeleton;membrane	metal ion binding;protein binding	6			Primary Focal Segmental Glomerulosclerosis FSGS		122036	209925	120131	3883.55	39474.2	19287.1	165558		71393.2	131886	109679	18273.5		16.897	17.6795	16.8743	11.9232	15.2686	14.2354	17.337		16.1235	17.0089	16.7429	14.1575		-2.24941	-1.60402	-2.41214	-6.29714	-3.48805	-4.56534	-1.70722		-2.53304	-1.96727	-2.0037	-3.85022
Q14137	Ribosome biogenesis protein BOP1	BOP1		cell organization and biogenesis;cell proliferation;metabolic process;regulation of biological process	nucleus	protein binding;RNA binding	8		Major pathway of rRNA processing in the nucleolus and cytosol			2.91526e+06	3.49389e+06	2.89842e+06	985201	1.79595e+06	1.73231e+06	2.24926e+06	990331	2.37703e+06	2.87594e+06	1.82792e+06	1.34011e+06		21.4752	21.7364	21.4668	19.9101	20.7763	20.7243	21.101	19.9176	21.1807	21.4556	20.8018	20.3539		2.32883	2.45286	2.18045	1.68976	2.01964	1.92357	2.05681	1.89733	2.52419	2.4794	2.05514	2.34624
Q13200	26S proteasome non-ATPase regulatory subunit 2	PSMD2		metabolic process;regulation of biological process;response to stimulus;transport	cytoplasm;cytosol;extracellular;membrane;nucleus;organelle lumen;proteasome	catalytic activity;enzyme regulator activity;nucleotide binding;protein binding	3	Epstein-Barr virus infection; Proteasome	Regulation of RAS by GAPs; CDT1 association with the CDC6:ORC:origin complex; Downstream TCR signaling; UCH proteinases; NIK-->noncanonical NF-kB signaling; Hh mutants that don't undergo autocatalytic processing are degraded by ERAD; SCF-beta-TrCP mediated degradation of Emi1; Neutrophil degranulation; Cross-presentation of soluble exogenous antigens (endosomes); Separation of Sister Chromatids; …	Proteasome Degradation; TNF alpha Signaling Pathway; Parkin-Ubiquitin Proteasomal System pathway				121686	87895.1				79801.5								16.8928	16.4235				16.2841								-2.39359	-1.79681				-1.73609
P51571	Translocon-associated protein subunit delta	SSR4			endoplasmic reticulum;membrane		X	Protein processing in endoplasmic reticulum	SRP-dependent cotranslational protein targeting to membrane			1.29712e+06	1.39457e+06	1.34653e+06	432625	757736	825324	960110	426975	532407	644491	578932	311973		20.3069	20.4114	20.3608	18.7228	19.5313	19.6546	19.8728	18.7038	19.0222	19.2978	19.143	18.2511		1.16052	1.12785	1.07443	0.502459	0.77466	0.853905	0.828635	0.683571	0.36563	0.321595	0.396403	0.243377
O95994	Anterior gradient protein 2 homolog	AGR2		cell differentiation;regulation of biological process;response to stimulus;transport	endoplasmic reticulum;extracellular;mitochondrion	protein binding	7					66568.2	266880	121236		28996.6	75333.3	137913			150425				16.0225	18.0258	16.8875		14.8236	16.201	17.0734			17.1987				-3.12382	-1.25771	-2.39893		-3.93308	-2.5997	-1.97081			-1.77752
O95758	Polypyrimidine tract-binding protein 3	PTBP3		cell differentiation;metabolic process;regulation of biological process	nucleus	RNA binding	9					2.38616e+06	2.55765e+06	1.58296e+06	560253	1.07789e+06	1.22597e+06	1.80053e+06	434191	1.34786e+06	1.30871e+06	745423	494735		21.1863	21.2864	20.5942	19.0957	20.0398	20.2255	20.78	18.728	20.3622	20.3197	19.5077	18.9163		2.0399	2.00285	1.30781	0.87542	1.2831	1.42479	1.73578	0.707748	1.7057	1.34351	0.761069	0.908613
Q92797	Symplekin	SYMPK		metabolic process;regulation of biological process;transport	cytoplasm;cytoskeleton;cytosol;membrane;nucleus	protein binding	19	Tight junction; mRNA surveillance pathway	mRNA 3'-end processing; Transport of Mature mRNA Derived from an Intronless Transcript; mRNA Splicing - Major Pathway; Cleavage of Growing Transcript in the Termination Region ; Processing of Intronless Pre-mRNAs			88460.3	76014.2	168142	61813.1	144703	65080.6		47753.8	64033.1	95660.3	99562.8	25935.3		16.4327	16.214	17.3593	15.9156	17.1427	15.9899		15.5433	15.9665	16.5456	16.6033	14.6626		-2.71362	-3.06956	-1.92707	-2.30468	-1.61394	-2.81076		-2.4769	-2.69001	-2.43057	-2.14331	-3.34506
P62258	14-3-3 protein epsilon	YWHAE		cell organization and biogenesis;cellular component movement;cellular homeostasis;metabolic process;regulation of biological process;response to stimulus;transport	cytoplasm;cytosol;membrane;mitochondrion;nucleus	protein binding;RNA binding	17; CHR_HSCHR17_2_CTG2	Viral carcinogenesis; Epstein-Barr virus infection; Neurotrophin signaling pathway; Hippo signaling pathway; Oocyte meiosis; Cell cycle; PI3K-Akt signaling pathway	Regulation of PLK1 Activity at G2/M Transition; Recruitment of NuMA to mitotic centrosomes; Loss of Nlp from mitotic centrosomes; NADE modulates death signalling; Translocation of GLUT4 to the plasma membrane; Deregulated CDK5 triggers multiple neurodegenerative pathways in Alzheimer's disease models; Chk1/Chk2(Cds1) mediated inactivation of Cyclin B:Cdk1 complex; Signaling by Hippo; AURKA Activa…	Cell Cycle; Myometrial Relaxation and Contraction Pathways; VEGFA-VEGFR2 Signaling Pathway; Calcium Regulation in the Cardiac Cell; Sudden Infant Death Syndrome (SIDS) Susceptibility Pathways		187242	245026	175042	220090	133580	135622	93578.1	172101	145548	79273.1	133178	109984		17.5145	17.9026	17.4173	17.7477	17.0273	17.0492	16.5139	17.3929	17.1511	16.2745	17.023	16.7469		-1.63181	-1.38096	-1.86904	-0.472563	-1.72933	-1.75147	-2.53032	-0.627327	-1.50541	-2.70166	-1.72363	-1.26075
P02786	Transferrin receptor protein 1	TFRC		cell differentiation;cell organization and biogenesis;cellular homeostasis;metabolic process;regulation of biological process;response to stimulus;transport	cell surface;endosome;extracellular;membrane	protein binding;receptor activity;RNA binding;transporter activity	3	Endocytosis; HIF-1 signaling pathway; Hematopoietic cell lineage; Phagosome	Cargo recognition for clathrin-mediated endocytosis; Transferrin endocytosis and recycling; Golgi Associated Vesicle Biogenesis	Iron metabolism in placenta		885871	1.21147e+06	1.05843e+06	468022	652055	665292	950830	347523	686554	783554	759407	389934		19.7567	20.2083	20.0135	18.8362	19.3146	19.3436	19.8588	18.4067	19.389	19.5797	19.5345	18.5729		0.610374	0.924792	0.72711	0.615916	0.55796	0.542933	0.814623	0.386526	0.732474	0.603469	0.787884	0.565189
P49368	T-complex protein 1 subunit gamma	CCT3		cell organization and biogenesis;metabolic process;regulation of biological process;transport	cytoplasm;cytoskeleton;cytosol;membrane	nucleotide binding;protein binding;RNA binding	1		BBSome-mediated cargo-targeting to cilium; Prefoldin mediated transfer of substrate to CCT/TriC; Cooperation of PDCL (PhLP1) and TRiC/CCT in G-protein beta folding; Association of TriC/CCT with target proteins during biosynthesis; Formation of tubulin folding intermediates by CCT/TriC; Folding of actin by CCT/TriC			116644	119661	100743	78089.8	62554.8	64208.7	44434.7	101405	41136	39327.1	114803	87436.3		16.8318	16.8686	16.6203	16.2528	15.9328	15.9705	15.4394	16.6298	15.3281	15.2632	16.8088	16.4159		-2.3146	-2.41494	-2.66606	-1.96745	-2.82384	-2.83022	-3.60481	-1.39045	-3.32842	-3.71297	-1.93783	-1.59174
Q9UQM7	Calcium/calmodulin-dependent protein kinase type II subunit alpha	CAMK2A		cell differentiation;cell organization and biogenesis;metabolic process;regulation of biological process;response to stimulus;transport	cytoplasm;cytosol;membrane;mitochondrion;nucleus	catalytic activity;metal ion binding;nucleotide binding;protein binding	5	Dopaminergic synapse; HIF-1 signaling pathway; Amphetamine addiction; Neurotrophin signaling pathway; Oxytocin signaling pathway; Olfactory transduction; Circadian entrainment; ErbB signaling pathway; Long-term potentiation; Insulin secretion; Glioma; Adrenergic signaling in cardiomyocytes; Tuberculosis; Glucagon signaling pathway; Melanogenesis; Wnt signaling pathway; Proteoglycans in cancer; Al…	Ion homeostasis; HSF1-dependent transactivation; Interferon gamma signaling; Ca2+ pathway; Phase 0 - rapid depolarisation; Ras activation uopn Ca2+ infux through NMDA receptor; Ion transport by P-type ATPases; Unblocking of NMDA receptor, glutamate binding and activation; Trafficking of AMPA receptors; CREB phosphorylation through the activation of CaMKII; RAF/MAP kinase cascade; Interleukin-20 f…	B Cell Receptor Signaling Pathway; Corticotropin-releasing hormone signaling pathway; Brain-Derived Neurotrophic Factor (BDNF) signaling pathway; Common Pathways Underlying Drug Addiction; Myometrial Relaxation and Contraction Pathways; Melatonin metabolism and effects; Mecp2 and Associated Rett Syndrome; EGF/EGFR Signaling Pathway; Calcium Regulation in the Cardiac Cell; ErbB Signaling Pathway		103413	244764	225537	129336	95773.1	140561	75085	124528	39316.6	91622.4	84308.9	101370		16.6581	17.901	17.783	16.9808	16.5473	17.1008	16.1962	16.9261	15.2628	16.4834	16.3634	16.6293		-2.4883	-1.38251	-1.50338	-1.23954	-2.20934	-1.69986	-2.84797	-1.09411	-3.39369	-2.49279	-2.38323	-1.3784
Q9UBI6	Guanine nucleotide-binding protein G(I)/G(S)/G(O) subunit gamma-12	GNG12		regulation of biological process;response to stimulus	membrane	protein binding;signal transducer activity	1	Dopaminergic synapse; Serotonergic synapse; Glutamatergic synapse; MAPK signaling pathway; Circadian entrainment; Morphine addiction; Pathways in cancer; Regulation of actin cytoskeleton; Retrograde endocannabinoid signaling; GABAergic synapse; Alcoholism; Ras signaling pathway; Chemokine signaling pathway; Cholinergic synapse; PI3K-Akt signaling pathway	G alpha (z) signalling events; Activation of G protein gated Potassium channels; Cooperation of PDCL (PhLP1) and TRiC/CCT in G-protein beta folding; Glucagon-type ligand receptors; Thromboxane signalling through TP receptor; ADP signalling through P2Y purinoceptor 1; G beta:gamma signalling through PI3Kgamma; Vasopressin regulates renal water homeostasis via Aquaporins; G-protein activation; Inhi…	Myometrial Relaxation and Contraction Pathways; G Protein Signaling Pathways; Chemokine signaling pathway; Focal Adhesion-PI3K-Akt-mTOR-signaling pathway; Regulation of Actin Cytoskeleton; Calcium Regulation in the Cardiac Cell		537246	257413	436581	364033	229961	281983	234937	258990	225904	333741	328850	298214		19.0352	17.9737	18.7359	18.4737	17.811	18.1052	17.8419	17.9825	17.7853	18.3484	18.3271	18.186		-0.111139	-1.30982	-0.550495	0.25341	-0.945645	-0.695449	-1.20229	-0.037687	-0.87119	-0.627837	-0.41956	0.178307
P19022	Cadherin-2	CDH2		cell differentiation;cell organization and biogenesis;cellular component movement;metabolic process;regulation of biological process	cell surface;cytoplasm;cytoskeleton;membrane;organelle lumen	metal ion binding;protein binding	18	Arrhythmogenic right ventricular cardiomyopathy (ARVC); Cell adhesion molecules (CAMs)	Adherens junctions interactions; Post-translational protein phosphorylation; Regulation of Insulin-like Growth Factor (IGF) transport and uptake by Insulin-like Growth Factor Binding Proteins (IGFBPs); CDO in myogenesis	Neural Crest Differentiation; Arrhythmogenic Right Ventricular Cardiomyopathy; Brain-Derived Neurotrophic Factor (BDNF) signaling pathway; Primary Focal Segmental Glomerulosclerosis FSGS		293554	190329	315942	11968.7	134535	85199.7	233016	7565.12	81134.8	235534	151266	30254.3		18.1633	17.5381	18.2693	13.547	17.0376	16.3786	17.8301	12.8851	16.308	17.8456	17.2067	14.8849		-0.983097	-1.74541	-1.01709	-4.67332	-1.71905	-2.42214	-1.21414	-5.13507	-2.34851	-1.13063	-1.53991	-3.12283
Q15165	Serum paraoxonase/arylesterase 2											277870	601598	346078	34532	151676	179960	347441	25647.4	188684	250541	113878	61603.2		18.0841	19.1984	18.4007	15.0756	17.2106	17.4573	18.4064	14.6465	17.5256	17.9347	16.7971	15.9107		-1.06231	-0.0850992	-0.88565	-3.14465	-1.54605	-1.34338	-0.637795	-3.3737	-1.13092	-1.04152	-1.9495	-2.09696
Q16186	Proteasomal ubiquitin receptor ADRM1	ADRM1		cell organization and biogenesis;metabolic process;regulation of biological process	cytoplasm;cytosol;membrane;nucleus;proteasome	enzyme regulator activity;protein binding	20		UCH proteinases; Ub-specific processing proteases			973919	1.0287e+06	700954	582555	568942	547773	494801	546742	550595	734348	738120	589812		19.8934	19.9724	19.419	19.152	19.1179	19.0632	18.9165	19.0605	19.0706	19.4861	19.4935	19.1699		0.747079	0.688851	0.132573	0.931734	0.361247	0.262524	-0.127717	1.04028	0.414093	0.5099	0.746866	1.16221
P00558	Phosphoglycerate kinase 1	PGK1		cell differentiation;metabolic process;regulation of biological process;response to stimulus	cytoplasm;cytosol;membrane	catalytic activity;nucleotide binding;protein binding	X	HIF-1 signaling pathway; Carbon metabolism; Glycolysis / Gluconeogenesis; Biosynthesis of amino acids; Metabolic pathways	Gluconeogenesis; Glycolysis	Cori Cycle; Photodynamic therapy-induced HIF-1 survival signaling; Glycolysis and Gluconeogenesis		29737.1	16973.2	75020.6	43368				26244.7	26350.8					14.86	14.051	16.195	15.4043				14.6797	14.6856					-4.28639	-5.23257	-3.09139	-2.81596				-3.34049	-3.97098
Q5VW38	Protein GPR107	GPR107		transport	endosome;Golgi;membrane	protein binding	9					76415.6	81611.8	84122.1		39204.5	59829.5	40336.8		31973.1	57663.7	42516.4			16.2216	16.3165	16.3602		15.2587	15.8686	15.2998		14.9646	15.8154	15.3757			-2.92478	-2.96705	-2.92619		-3.49794	-2.93213	-3.7444		-3.69197	-3.16083	-3.3709
O75934	Pre-mRNA-splicing factor SPF27	BCAS2		cell organization and biogenesis;metabolic process	nucleus;spliceosomal complex	protein binding	1	Spliceosome	mRNA Splicing - Major Pathway			50428.8	160607	138499	172630	83788.5	108385	52108.3	60312.9	133088	110917	193593	117163		15.622	17.2932	17.0795	17.3973	16.3545	16.7258	15.6692	15.8802	17.022	16.7591	17.5627	16.8382		-3.5244	-1.99037	-2.20687	-0.822979	-2.40221	-2.07488	-3.37498	-2.14004	-1.63452	-2.21708	-1.18396	-1.16953
Q15286	Ras-related protein Rab-35	RAB35		cell organization and biogenesis;regulation of biological process;response to stimulus;transport	cytosol;endosome;membrane;mitochondrion	catalytic activity;nucleotide binding;protein binding	12	Endocytosis	TBC/RABGAPs; RAB GEFs exchange GTP for GDP on RABs; RAB geranylgeranylation			1.36663e+06	929847	1.23138e+06	939603	669635	772202	806572	724143	746298	834823	650087	682125		20.3822	19.8266	20.2318	19.8417	19.353	19.5586	19.6214	19.4659	19.5094	19.6711	19.3103	19.3797		1.23583	0.543095	0.945455	1.62139	0.596341	0.757923	0.577238	1.44569	0.852854	0.694906	0.563643	1.37199
P35222	Catenin beta-1	CTNNB1		cell communication;cell differentiation;cell growth;cell organization and biogenesis;cell proliferation;cellular component movement;metabolic process;regulation of biological process;response to stimulus;transport	cytoplasm;cytoskeleton;cytosol;membrane;nucleus	DNA binding;protein binding;signal transducer activity	3	Arrhythmogenic right ventricular cardiomyopathy (ARVC); Tight junction; Pathogenic Escherichia coli infection; Hippo signaling pathway; Rap1 signaling pathway; Endometrial cancer; Breast cancer; Colorectal cancer; Pathways in cancer; Prostate cancer; Thyroid hormone signaling pathway; HTLV-I infection; Melanogenesis; Wnt signaling pathway; Focal adhesion; Proteoglycans in cancer; Adherens junctio…	Beta-catenin phosphorylation cascade; CDO in myogenesis; Binding of TCF/LEF:CTNNB1 to target gene promoters; Apoptotic cleavage of cell adhesion proteins; RUNX3 regulates WNT signaling; S37 mutants of beta-catenin aren't phosphorylated; LRR FLII-interacting protein 1 (LRRFIP1) activates type I IFN production; Ca2+ pathway; S33 mutants of beta-catenin aren't phosphorylated; Disassembly of the dest…	Androgen receptor signaling pathway; MicroRNAs in cardiomyocyte hypertrophy; Heart Development; TNF related weak inducer of apoptosis (TWEAK) Signaling Pathway; Neural Crest Differentiation; Arrhythmogenic Right Ventricular Cardiomyopathy; Pathogenic Escherichia coli infection; Corticotropin-releasing hormone signaling pathway; Adipogenesis; Gastric cancer network 2; Brain-Derived Neurotrophic Fa…		421907	324877	608561	304921	292339	300955	323786	198359	360324	401490	372029	153634		18.6866	18.3095	19.215	18.2181	18.1573	18.1992	18.3047	17.5978	18.4589	18.615	18.5051	17.2291		-0.459797	-0.974003	-0.0713442	-0.00222202	-0.599391	-0.601509	-0.739522	-0.42247	-0.197604	-0.361202	-0.241575	-0.778545
P24534	Elongation factor 1-beta	EEF1B2		metabolic process;response to stimulus	cytoplasm;cytosol;endoplasmic reticulum;nucleus	protein binding;RNA binding	2; CHR_HSCHR2_6_CTG7_2		Eukaryotic Translation Elongation	Translation Factors		125423	131322	160022	53619	77894.2	98180.7	73140.5	59727.2		65361.2	69713.6	56720.1		16.9364	17.0027	17.2879	15.7105	16.2492	16.5832	16.1584	15.8661		15.9961	16.0892	15.7916		-2.20992	-2.28079	-1.99848	-2.50984	-2.50745	-2.21754	-2.88582	-2.15412		-2.98006	-2.65748	-2.21611
Q96NC0	Zinc finger matrin-type protein 2	ZMAT2		cell organization and biogenesis;metabolic process	nucleus	DNA binding;metal ion binding;protein binding;RNA binding	5	Spliceosome				237464	187504	180832	76383.2	101838	112872	183488	69463.8	179527	283409	225256	135490		17.8573	17.5166	17.4643	16.221	16.6359	16.7843	17.4853	16.084	17.4538	18.1125	17.7812	17.0478		-1.28902	-1.76698	-1.8221	-1.99933	-2.12076	-2.01637	-1.55888	-1.93625	-1.2027	-0.863681	-0.965422	-0.959855
Q8WTT2	Nucleolar complex protein 3 homolog	NOC3L		cell differentiation	mitochondrion;nucleus	RNA binding	10					2.22587e+06	1.33783e+06	2.05416e+06	1.34374e+06	1.2127e+06	1.14843e+06	1.47781e+06	878864	2.4223e+06	2.50293e+06	1.94196e+06	1.17976e+06		21.0859	20.3515	20.9701	20.3578	20.2098	20.1312	20.495	19.7453	21.2079	21.2552	20.8891	20.1701		1.93958	1.06792	1.68373	2.13752	1.45311	1.33054	1.45082	1.72506	2.55141	2.27898	2.14245	2.16237
Q96SB8	Structural maintenance of chromosomes protein 6	SMC6		cell organization and biogenesis;metabolic process;regulation of biological process;response to stimulus;transport	chromosome;cytoskeleton;nucleus	nucleotide binding;protein binding;transporter activity	2		SUMOylation of DNA damage response and repair proteins			2.31628e+06	3.21719e+06	2.03369e+06	581503	1.10603e+06	1323271	1.96401e+06	612223	1.73762e+06	1.77227e+06	1.37311e+06	706973		21.1434	21.6174	20.9557	19.1494	20.077	20.3357	20.9054	19.2237	20.7287	20.7572	20.389	19.4313		1.99702	2.33383	1.66928	0.929128	1.32028	1.53498	1.86117	1.20348	2.07214	1.78096	1.64239	1.42361
Q8N2F6	Armadillo repeat-containing protein 10	ARMC10		regulation of biological process	endoplasmic reticulum;membrane;mitochondrion	protein binding	7					250129	274275	202070	123200	151228	173918	130503	116125	58601.5	144255	140241	54883.4		17.9323	18.0653	17.6245	16.9106	17.2064	17.408	16.9937	16.8253	15.8387	17.1383	17.0975	15.7441		-1.21405	-1.21827	-1.66189	-1.30965	-1.55031	-1.39265	-2.05048	-1.19491	-2.81789	-1.83794	-1.64908	-2.2636
Q9Y5B9	FACT complex subunit SPT16	SUPT16H		cell organization and biogenesis;metabolic process;regulation of biological process;response to stimulus	chromosome;nucleus	protein binding;RNA binding	14		HIV elongation arrest and recovery; TP53 Regulates Transcription of DNA Repair Genes; Tat-mediated HIV elongation arrest and recovery; Formation of RNA Pol II elongation complex ; Formation of HIV elongation complex in the absence of HIV Tat; Regulation of TP53 Activity through Phosphorylation; RNA Polymerase II Pre-transcription Events; Pausing and recovery of HIV elongation; Pausing and recover…			1.32643e+06	5.88783e+06	1.31515e+06	648637	1.32466e+06	956729	1.36306e+06	621316	1.42649e+06	933808	831934	663810		20.3391	22.4893	20.3268	19.3071	20.3372	19.8678	20.3784	19.245	20.444	19.8328	19.6661	19.3404		1.19276	3.20576	1.04041	1.08675	1.58052	1.06705	1.33421	1.22475	1.7875	0.856562	0.919478	1.33273
Q14151	Scaffold attachment factor B2	SAFB2		cell differentiation;metabolic process;regulation of biological process	cytoplasm;nucleus	DNA binding;protein binding;RNA binding	19					3.37703e+06	4.13879e+06	3.50341e+06	940163	1.82847e+06	1.94903e+06	2.80974e+06	1.00145e+06	2.99661e+06	3.73359e+06	2.99555e+06	1.68682e+06		21.6873	21.9808	21.7403	19.8426	20.8022	20.8943	21.422	19.9337	21.5149	21.8321	21.5144	20.6859		2.54096	2.69724	2.45394	1.62225	2.04553	2.09363	2.3778	1.91343	2.85836	2.85593	2.76776	2.6782
P13073	Cytochrome c oxidase subunit 4 isoform 1, mitochondrial	COX4I1		metabolic process;response to stimulus;transport	membrane;mitochondrion;nucleus	catalytic activity;protein binding;transporter activity	16	Huntington's disease; Parkinson's disease; Alzheimer's disease; Oxidative phosphorylation; Non-alcoholic fatty liver disease (NAFLD); Metabolic pathways; Cardiac muscle contraction	TP53 Regulates Metabolic Genes; Respiratory electron transport	Electron Transport Chain		2.25725e+06	2.95195e+06	3.43284e+06	1.51351e+06	1.555e+06	2.20892e+06	2.04882e+06	1.26389e+06	940473	1.97457e+06	1.87306e+06	1.05247e+06		21.1061	21.4932	21.711	20.5295	20.5685	21.0749	20.9664	20.2694	19.843	20.9131	20.837	20.0053		1.95977	2.2097	2.42459	2.30917	1.8118	2.27421	1.92216	2.24921	1.18649	1.9369	2.09034	1.99766
Q7Z5J4	Retinoic acid-induced protein 1	RAI1		regulation of biological process	cytoplasm;mitochondrion;nucleus	DNA binding;metal ion binding;protein binding	17		Circadian Clock			345294	397599	252031	49864.3	118638	133255	251249	75175.6	212382	354262	220380	88927.5		18.3975	18.601	17.9432	15.6057	16.8562	17.0238	17.9388	16.198	17.6963	18.4345	17.7496	16.4403		-0.748897	-0.682583	-1.34314	-2.61458	-1.90047	-1.77687	-1.10545	-1.82224	-0.960235	-0.541748	-0.996995	-1.56734
Q9BW60	Elongation of very long chain fatty acids protein 1	ELOVL1		metabolic process	endoplasmic reticulum;membrane	catalytic activity;protein binding	1	Fatty acid elongation	Synthesis of very long-chain fatty acyl-CoAs; Linoleic acid (LA) metabolism; alpha-linolenic acid (ALA) metabolism			1.06748e+06	676273	1.15198e+06	129596	433689	549592	569468	127485	192856	384536	280562	98448.6		20.0258	19.3672	20.1357	16.9837	18.7263	19.068	19.1193	16.96	17.5572	18.5528	18.098	16.5871		0.87941	0.0837056	0.849303	-1.23664	-0.0303735	0.267306	0.0750494	-1.06026	-1.09937	-0.423446	-0.648669	-1.4206
Q14194	Dihydropyrimidinase-related protein 1	CRMP1		cell organization and biogenesis;cellular component movement;metabolic process;regulation of biological process	cytoplasm;cytoskeleton;cytosol	catalytic activity;protein binding	4		CRMPs in Sema3A signaling			84267.1	23873.1	211367	39353.6	26374.2	25257.6	19480.2	144081		53705.5	24892.7	90111.6		16.3627	14.5431	17.6894	15.2642	14.6868	14.6244	14.2497	17.1365		15.7128	14.6034	16.4594		-2.78368	-4.74044	-1.597	-2.95609	-4.06983	-4.17627	-4.79449	-0.883701		-3.26342	-4.1432	-1.54826
Q15843	NEDD8	NEDD8		cellular homeostasis;metabolic process;regulation of biological process;response to stimulus	cytosol;nucleus	protein binding	14		Cargo recognition for clathrin-mediated endocytosis; UCH proteinases; TGF-beta receptor signaling activates SMADs; Iron uptake and transport; Neddylation	EGF/EGFR Signaling Pathway		547672	480918	273402	100088	70297.5	238904	645086	97268.1	482034	344142	294104	316451		19.063	18.8754	18.0607	16.6109	16.1012	17.8661	19.2991	16.5697	18.8788	18.3926	18.166	18.2716		-0.0834096	-0.408107	-1.22572	-1.60939	-2.65549	-0.934623	0.254926	-1.45054	0.222236	-0.58356	-0.580665	0.26394
P50402	Emerin	EMD		cell differentiation;cell organization and biogenesis;regulation of biological process;response to stimulus	cytoplasm;endoplasmic reticulum;membrane;nucleus	protein binding	X	Arrhythmogenic right ventricular cardiomyopathy (ARVC); Dilated cardiomyopathy; Hypertrophic cardiomyopathy (HCM)	Depolymerisation of the Nuclear Lamina; Initiation of Nuclear Envelope Reformation; Clearance of Nuclear Envelope Membranes from Chromatin	Arrhythmogenic Right Ventricular Cardiomyopathy		3.43625e+06	3.36921e+06	3.08361e+06	963695	1.752e+06	1.87924e+06	2.75364e+06	869408	2.15317e+06	2.5024e+06	2.21019e+06	953578		21.7124	21.684	21.5562	19.8782	20.7406	20.8417	21.3929	19.7297	21.038	21.2549	21.0757	19.863		2.56604	2.40044	2.2698	1.65792	1.98389	2.04102	2.3487	1.70945	2.38149	2.27867	2.32911	1.85531
Q99729	Heterogeneous nuclear ribonucleoprotein A/B	HNRNPAB		cell organization and biogenesis;regulation of biological process	cytoplasm;nucleus	DNA binding;protein binding;RNA binding	5			Preimplantation Embryo; mRNA Processing		9.55147e+06	1.28454e+07	9.20509e+06	4.2221e+06	6.33714e+06	6.29143e+06	8.6339e+06	3.67889e+06	9.83684e+06	1.11166e+07	8.68535e+06	5.12513e+06		23.1873	23.6147	23.134	22.0095	22.5954	22.585	23.0416	21.8108	23.2298	23.4062	23.0502	22.2892		4.04093	4.33121	3.84761	3.78923	3.83873	3.78426	3.99738	3.79062	4.57322	4.43001	4.30352	4.28147
Q9H501	ESF1 homolog	ESF1		metabolic process;regulation of biological process	nucleus	RNA binding	20					609075	701043	608758	645305	578729	678466	407732	209481	278803	349834	267512	146907		19.2163	19.4191	19.2155	19.2996	19.1425	19.3719	18.6373	17.6765	18.0889	18.4163	18.0292	17.1645		0.0698982	0.135604	-0.0708759	1.07932	0.385854	0.57122	-0.406942	-0.343761	-0.56765	-0.559894	-0.717386	-0.843136
P08865	40S ribosomal protein SA	RPSA		cell organization and biogenesis;metabolic process;transport	cytoplasm;cytosol;membrane;nucleus;ribosome	protein binding;receptor activity;RNA binding;structural molecule activity	3	Ribosome	Peptide chain elongation; Eukaryotic Translation Termination; Viral mRNA Translation; Formation of the ternary complex, and subsequently, the 43S complex; L13a-mediated translational silencing of Ceruloplasmin expression; Selenocysteine synthesis; Nonsense Mediated Decay (NMD) independent of the Exon Junction Complex (EJC); Nonsense Mediated Decay (NMD) enhanced by the Exon Junction Complex (EJC)…	Cytoplasmic Ribosomal Proteins		2.78586e+06	2.0616e+06	3.02218e+06	1.23699e+06	1.92849e+06	1.7984e+06	1.82084e+06	865763	903522	1.02925e+06	855365	400410		21.4097	20.9753	21.5272	20.2384	20.879	20.7783	20.7962	19.7236	19.7852	19.9732	19.7062	18.6111		2.26333	1.69179	2.24077	2.0181	2.12237	1.97759	1.75197	1.70339	1.12866	0.996961	0.959549	0.603434
Q09161	Nuclear cap-binding protein subunit 1	NCBP1		cell organization and biogenesis;metabolic process;regulation of biological process;response to stimulus;transport	cytoplasm;cytosol;mitochondrion;nucleus	protein binding;RNA binding	9	Spliceosome; mRNA surveillance pathway; RNA transport	Signaling by FGFR2 IIIa TM; RNA polymerase II transcribes snRNA genes; Abortive elongation of HIV-1 transcript in the absence of Tat; Formation of HIV-1 elongation complex containing HIV-1 Tat; Formation of the HIV-1 Early Elongation Complex; SLBP independent Processing of Histone Pre-mRNAs; mRNA Splicing - Major Pathway; FGFR2 alternative splicing; mRNA Splicing - Minor Pathway; Cleavage of Grow…	mRNA Processing		519992	705453	533686	147241	298114	383030	282151	192283	430463	406488	369922	210261		18.9881	19.4282	19.0256	17.1678	18.1855	18.5471	18.1061	17.5529	18.7155	18.6329	18.4969	17.6818		-0.158234	0.14465	-0.260754	-1.05248	-0.571168	-0.253596	-0.938096	-0.467354	0.0589915	-0.343353	-0.24977	-0.32586
P17480	Nucleolar transcription factor 1	UBTF		metabolic process;regulation of biological process	nucleus	DNA binding;protein binding;RNA binding	17		RNA Polymerase I Chain Elongation; NoRC negatively regulates rRNA expression; RNA Polymerase I Transcription Termination; RNA Polymerase I Promoter Escape; RNA Polymerase I Promoter Opening; RNA Polymerase I Transcription Initiation	Ectoderm Differentiation		396427	1.47427e+06	294640	98277.1	302629	261867	306355	106914	367259	268810	223208	93822.4		18.5967	20.4916	18.1686	16.5846	18.2072	17.9985	18.2248	16.7061	18.4864	18.0362	17.768	16.5176		-0.549667	1.20803	-1.11779	-1.63573	-0.549483	-0.802223	-0.819361	-1.31413	-0.1701	-0.939976	-0.978603	-1.49004
P39656	Dolichyl-diphosphooligosaccharide--protein glycosyltransferase 48 kDa subunit	DDOST		metabolic process;response to stimulus;transport	endoplasmic reticulum;membrane	catalytic activity;protein binding	1	N-Glycan biosynthesis; Protein processing in endoplasmic reticulum; Metabolic pathways	Advanced glycosylation endproduct receptor signaling; Asparagine N-linked glycosylation; Neutrophil degranulation; SRP-dependent cotranslational protein targeting to membrane	AGE/RAGE pathway		1.41637e+06	2.17946e+06	1.91564e+06	285833	863879	1.15077e+06	1.61082e+06	162600	715983	1.00165e+06	851409	157740		20.4338	21.0555	20.8694	18.1248	19.7205	20.1342	20.6194	17.311	19.4496	19.9339	19.6995	17.2672		1.2874	1.772	1.58301	-0.0954888	0.963795	1.33347	1.57516	-0.709253	0.793027	0.957745	0.952861	-0.740495
O95816	BAG family molecular chaperone regulator 2	BAG2		metabolic process;regulation of biological process	cytosol	enzyme regulator activity;nucleotide binding;protein binding	6	Protein processing in endoplasmic reticulum	Regulation of HSF1-mediated heat shock response			421258	529270	476155	258233	308803	291943	231708	285737	313884	309645	374074	258791		18.6843	19.0136	18.8611	17.9783	18.2363	18.1553	17.8219	18.1243	18.2599	18.2403	18.513	17.9814		-0.462018	-0.269895	-0.425313	-0.241984	-0.520348	-0.645367	-1.22226	0.104106	-0.396666	-0.735949	-0.233666	-0.0262531
O75694	Nuclear pore complex protein Nup155	NUP155		cell organization and biogenesis;metabolic process;regulation of biological process;transport	membrane;nucleus	protein binding;structural molecule activity;transporter activity	5	RNA transport	Rev-mediated nuclear export of HIV RNA; ISG15 antiviral mechanism; NEP/NS2 Interacts with the Cellular Export Machinery; tRNA processing in the nucleus; Transcriptional regulation by small RNAs; Nuclear Pore Complex (NPC) Disassembly; Regulation of Glucokinase by Glucokinase Regulatory Protein; Vpr-mediated nuclear import of PICs; Regulation of HSF1-mediated heat shock response; snRNP Assembly; S…			1.15589e+06	1.83693e+06	1.48526e+06	498519	873223	901942	1.35937e+06	325177	1.11178e+06	1.47221e+06	839382	468312		20.1406	20.8089	20.5023	18.9273	19.736	19.7827	20.3745	18.3109	20.0844	20.4896	19.679	18.8371		0.994205	1.52533	1.2159	0.70699	0.979316	0.981979	1.33031	0.290644	1.4279	1.51335	0.932338	0.829429
Q5JVF3	PCI domain-containing protein 2	PCID2		cell organization and biogenesis;metabolic process;regulation of biological process;transport		DNA binding;protein binding;RNA binding	13					867311	939166	662566	226692	359734	477824	625264	254498	433741	686431	557720	340779		19.7262	19.841	19.3377	17.7904	18.4566	18.8661	19.2541	17.9573	18.7265	19.3888	19.0892	18.3785		0.579827	0.55748	0.0513194	-0.429927	-0.300105	0.0654249	0.209901	-0.062926	0.0699348	0.41255	0.342551	0.370793
Q9P013	Spliceosome-associated protein CWC15 homolog	CWC15		metabolic process	mitochondrion;nucleus;spliceosomal complex	protein binding;RNA binding	11	Spliceosome	mRNA Splicing - Major Pathway			386554	523930	537362	339142	423016	307308	315208	215589	384815	365747	409978	190749		18.5603	18.999	19.0355	18.3715	18.6904	18.2293	18.2659	17.7179	18.5538	18.4805	18.6452	17.5413		-0.586051	-0.284524	-0.250851	0.151231	-0.0663238	-0.571369	-0.778261	-0.302299	-0.102734	-0.495718	-0.101444	-0.466363
P68371	Tubulin beta-4B chain	TUBB4B		cell organization and biogenesis;cellular component movement;defense response;regulation of biological process;response to stimulus;transport	cytoplasm;cytoskeleton;cytosol;extracellular;nucleus;organelle lumen	catalytic activity;nucleotide binding;protein binding;RNA binding;structural molecule activity	9	Pathogenic Escherichia coli infection; Gap junction; Phagosome	COPI-independent Golgi-to-ER retrograde traffic; COPI-dependent Golgi-to-ER retrograde traffic; Carboxyterminal post-translational modifications of tubulin; Regulation of PLK1 Activity at G2/M Transition; Recruitment of NuMA to mitotic centrosomes; Hedgehog 'off' state; Loss of Nlp from mitotic centrosomes; Translocation of GLUT4 to the plasma membrane; Prefoldin mediated transfer of substrate to…	Pathogenic Escherichia coli infection; Parkin-Ubiquitin Proteasomal System pathway		1.24412e+06	2.7844e+06	1.18569e+06	692403	984199	928612	1.39909e+06	480314	998340	1.01356e+06	806631	602945		20.2467	21.4089	20.1773	19.4013	19.9086	19.8247	20.4161	18.8736	19.9292	19.951	19.6215	19.2017		1.10033	2.1254	0.890908	1.18095	1.15192	1.02402	1.37186	0.853397	1.27263	0.974796	0.874918	1.19399
O15523	ATP-dependent RNA helicase DDX3Y	DDX3Y		metabolic process;regulation of biological process	cytoplasm;cytosol;membrane;nucleus	catalytic activity;DNA binding;nucleotide binding;RNA binding	Y			RIG-I-like Receptor Signaling			46861.5	48400.3				48171.6								15.5161	15.5627				15.5559								-3.76742	-3.72366				-3.48831
Q9BZG1	Ras-related protein Rab-34	RAB34		cell organization and biogenesis;regulation of biological process;response to stimulus;transport	cytoplasm;Golgi;membrane	catalytic activity;nucleotide binding;protein binding	17		RAB geranylgeranylation			748407	563848	773444	489236	483075	586065	475933	287175	341657	352902	420577	259945		19.5135	19.1049	19.5609	18.9002	18.8819	19.1607	18.8604	18.1316	18.3822	18.4289	18.682	17.9878		0.367101	-0.178594	0.274552	0.679871	0.125212	0.360005	-0.183804	0.111351	-0.274351	-0.547296	-0.0646214	-0.0198364
P42677	40S ribosomal protein S27	RPS27		cell organization and biogenesis;cell proliferation;metabolic process;transport	cytosol;nucleus;ribosome	DNA binding;metal ion binding;protein binding;RNA binding;structural molecule activity	1	Ribosome	Peptide chain elongation; Viral mRNA Translation; Formation of the ternary complex, and subsequently, the 43S complex; GTP hydrolysis and joining of the 60S ribosomal subunit; Ribosomal scanning and start codon recognition; Separation of Sister Chromatids; SRP-dependent cotranslational protein targeting to membrane; Eukaryotic Translation Termination; L13a-mediated translational silencing of Ceru…	Cytoplasmic Ribosomal Proteins		2.75564e+06	3.09264e+06	2.80271e+06	999231	1.81545e+06	1.68482e+06	2.35455e+06	861202	1.71402e+06	2.0684e+06	1.55534e+06	997243		21.394	21.5604	21.4184	19.9305	20.7919	20.6842	21.167	19.716	20.709	20.9801	20.5688	19.9276		2.24759	2.27687	2.13201	1.71016	2.03522	1.88347	2.12281	1.69577	2.05242	2.00388	1.82217	1.9199
Q9BVK6	Transmembrane emp24 domain-containing protein 9	TMED9		cell organization and biogenesis;regulation of biological process;transport	endoplasmic reticulum;Golgi;membrane	protein binding	5		COPI-dependent Golgi-to-ER retrograde traffic; COPI-mediated anterograde transport			581606	817926	786331	46463	351104	328566	553913	34262.6	252943	314602	312557	59675		19.1497	19.6416	19.5848	15.5038	18.4215	18.3258	19.0793	15.0643	17.9485	18.2632	18.2538	15.8648		0.00331875	0.358072	0.298391	-2.7165	-0.335138	-0.474872	0.0350946	-2.95588	-0.708086	-0.713038	-0.492869	-2.14284
Q96A26	Protein FAM162A	FAM162A		cell death;metabolic process;regulation of biological process;response to stimulus	cytosol;membrane;mitochondrion	protein binding	3					178616	206272	388621	459665	173272	249187	177085	145407	109514	227011	253517	175016		17.4465	17.6542	18.568	18.8102	17.4027	17.9269	17.4341	17.1497	16.7408	17.7924	17.9517	17.4171		-1.69986	-1.62935	-0.718381	0.589922	-1.354	-0.873826	-1.61012	-0.870488	-1.91579	-1.1838	-0.794911	-0.590559
Q7Z6E9	E3 ubiquitin-protein ligase RBBP6	RBBP6		metabolic process;regulation of biological process;response to stimulus	chromosome;cytoplasm;cytoskeleton;cytosol;nucleus	catalytic activity;metal ion binding;protein binding;RNA binding	16		Antigen processing: Ubiquitination & Proteasome degradation			106328	37533.4	85213.1	38322.1	74100.7	56825.9	71665.9	6511.27	60062.5	101696	41435.8	14592.7		16.6982	15.1959	16.3788	15.2259	16.1772	15.7943	16.129	12.6687	15.8742	16.6339	15.3386	13.833		-2.44819	-4.08765	-2.9076	-2.99441	-2.57948	-3.00643	-2.91521	-5.3515	-2.78236	-2.3423	-3.40804	-4.17472
P30101	Protein disulfide-isomerase A3	PDIA3		cellular homeostasis;metabolic process;regulation of biological process;response to stimulus;transport	cell surface;endoplasmic reticulum;membrane;nucleus;organelle lumen	catalytic activity;protein binding;RNA binding	15	Protein processing in endoplasmic reticulum; Antigen processing and presentation	ER-Phagosome pathway; Calnexin/calreticulin cycle; Antigen Presentation: Folding, assembly and peptide loading of class I MHC			562792	516927	850948	308750	345298	453877	431121	284703	168994	329157	260713	247461		19.1022	18.9796	19.6987	18.2361	18.3975	18.7919	18.7177	18.1191	17.3666	18.3284	17.9921	17.9168		-0.0441212	-0.303939	0.412326	0.0157803	-0.359195	-0.00875312	-0.326472	0.0988774	-1.28993	-0.647791	-0.75453	-0.090839
Q9Y6N5	Sulfide:quinone oxidoreductase, mitochondrial	SQRDL; SQOR		metabolic process	membrane;mitochondrion	catalytic activity	15	Sulfur metabolism	Sulfide oxidation to sulfate			266434	569821	429884	1.13703e+06	318733	389189	494741	188351	286866	379450	355420	199993		18.0234	19.1201	18.7136	20.1168	18.282	18.5701	18.9163	17.5231	18.13	18.5336	18.4392	17.6096		-1.12294	-0.163392	-0.572798	1.89654	-0.474686	-0.230584	-0.127891	-0.497155	-0.526522	-0.442654	-0.307468	-0.398095
Q7L576	Cytoplasmic FMR1-interacting protein 1	CYFIP1		cell differentiation;cell growth;cell organization and biogenesis;development;regulation of biological process;response to stimulus;transport	cytoplasm;cytosol;extracellular;organelle lumen	protein binding;RNA binding	15	Regulation of actin cytoskeleton; RNA transport	Regulation of actin dynamics for phagocytic cup formation; VEGFA-VEGFR2 Pathway; Neutrophil degranulation; RHO GTPases Activate WASPs and WAVEs	Brain-Derived Neurotrophic Factor (BDNF) signaling pathway; G13 Signaling Pathway		218192	179098	242787	97779.8	160395	182872	230335	23751.7	228224	197759	166340	124628		17.7352	17.4504	17.8893	16.5772	17.2913	17.4805	17.8134	14.5357	17.8001	17.5934	17.3438	16.9273		-1.41112	-1.83315	-1.39706	-1.64305	-1.4654	-1.32022	-1.23083	-3.48448	-0.856448	-1.38282	-1.40285	-1.08042
O95810	Caveolae-associated protein 2	SDPR; CAVIN2		cell organization and biogenesis	cytoplasm;cytosol;membrane	protein binding	2					389525	572228	327162	197034	248948	146681	366670	226672	262716	274971	303718	200084		18.5714	19.1262	18.3196	17.5881	17.9255	17.1623	18.4841	17.7902	18.0031	18.0689	18.2124	17.6102		-0.575005	-0.157309	-0.966742	-0.632217	-0.83119	-1.63837	-0.560081	-0.229973	-0.653397	-0.907283	-0.534258	-0.397435
P11021	Endoplasmic reticulum chaperone BiP	HSPA5		cell communication;cell death;cell differentiation;cell organization and biogenesis;metabolic process;regulation of biological process;response to stimulus;transport	cell surface;cytoplasm;endoplasmic reticulum;membrane;mitochondrion;nucleus;organelle lumen	catalytic activity;metal ion binding;nucleotide binding;protein binding	9	Prion diseases; Protein export; Protein processing in endoplasmic reticulum; Thyroid hormone synthesis; Antigen processing and presentation	Platelet degranulation ; PERK regulates gene expression; ATF6 (ATF6-alpha) activates chaperone genes; Antigen Presentation: Folding, assembly and peptide loading of class I MHC; Regulation of HSF1-mediated heat shock response; IRE1alpha activates chaperones	Parkin-Ubiquitin Proteasomal System pathway; Apoptosis-related network due to altered Notch3 in ovarian cancer; Photodynamic therapy-induced unfolded protein response; MAPK Signaling Pathway		2.31339e+06	2.36614e+06	1.99568e+06	859275	1.27055e+06	1.36055e+06	2.22391e+06	601092	1.06023e+06	1.55778e+06	907203	557952		21.1416	21.1741	20.9285	19.7128	20.277	20.3758	21.0847	19.1972	20.0159	20.5711	19.7911	19.0898		1.99521	1.89056	1.64206	1.49246	1.52034	1.57506	2.04046	1.177	1.3594	1.59486	1.04444	1.0821
P14927	Cytochrome b-c1 complex subunit 7	UQCRB		cell organization and biogenesis;metabolic process;transport	membrane;mitochondrion	catalytic activity;protein binding;transporter activity	8	Huntington's disease; Parkinson's disease; Alzheimer's disease; Oxidative phosphorylation; Non-alcoholic fatty liver disease (NAFLD); Metabolic pathways; Cardiac muscle contraction	Respiratory electron transport	Electron Transport Chain		487324	575374	563702	665675	275239	503416	278647	490582	220109	382120	427131	278784		18.8945	19.1341	19.1046	19.3445	18.0703	18.9414	18.0881	18.9041	17.7479	18.5437	18.7043	18.0888		-0.251842	-0.149398	-0.181813	1.12416	-0.686351	0.140695	-0.956123	0.883912	-0.908678	-0.43254	-0.0423123	0.0811033
O15144	Actin-related protein 2/3 complex subunit 2	ARPC2		cell organization and biogenesis;cellular component movement;regulation of biological process;response to stimulus	cytoplasm;cytoskeleton;cytosol;endosome;membrane	protein binding;structural molecule activity	2	Endocytosis; Pathogenic Escherichia coli infection; Salmonella infection; Regulation of actin cytoskeleton; Bacterial invasion of epithelial cells; Fc gamma R-mediated phagocytosis; Shigellosis	EPHB-mediated forward signaling; Clathrin-mediated endocytosis; RHO GTPases Activate WASPs and WAVEs; Regulation of actin dynamics for phagocytic cup formation	Pathogenic Escherichia coli infection		356518	141669	375207	142205	211495	148487	197910	89827.2	209377	157457	194952	119768		18.4436	17.1122	18.5173	17.1176	17.6903	17.18	17.5945	16.4549	17.6757	17.2646	17.5728	16.8699		-0.702746	-2.17138	-0.769058	-1.10269	-1.06641	-1.62072	-1.44972	-1.56536	-0.980794	-1.71161	-1.17387	-1.1378
Q9NXE4	Sphingomyelin phosphodiesterase 4											686899	884308	1.01796e+06	419107	612977	604275	627113	321216	633388	597687	638589	351646		19.3897	19.7542	19.9572	18.677	19.2255	19.2048	19.2584	18.2932	19.2727	19.189	19.2845	18.4238		0.243376	0.470649	0.670857	0.456658	0.468799	0.40415	0.214162	0.27296	0.616191	0.212825	0.537898	0.41608
Q9BQC6	Ribosomal protein 63, mitochondrial	MRP63; MRPL57		cell organization and biogenesis;metabolic process	membrane;mitochondrion;ribosome	structural molecule activity	13		Mitochondrial translation initiation; Mitochondrial translation elongation; Mitochondrial translation termination			669235	512456	387834	172474	247974	347596	465215	127092	266106	428867	290667	148858		19.3522	18.9671	18.5651	17.396	17.9198	18.4071	18.8275	16.9555	18.0216	18.7102	18.149	17.1836		0.205791	-0.316471	-0.721305	-0.824279	-0.836849	-0.393644	-0.216667	-1.06471	-0.634897	-0.266036	-0.597621	-0.824103
P62917	60S ribosomal protein L8	RPL8		cell organization and biogenesis;metabolic process;response to stimulus;transport	cytoplasm;cytosol;membrane;ribosome	RNA binding;structural molecule activity	8	Ribosome	Peptide chain elongation; Eukaryotic Translation Termination; Viral mRNA Translation; L13a-mediated translational silencing of Ceruloplasmin expression; Nonsense Mediated Decay (NMD) independent of the Exon Junction Complex (EJC); Selenocysteine synthesis; Nonsense Mediated Decay (NMD) enhanced by the Exon Junction Complex (EJC); GTP hydrolysis and joining of the 60S ribosomal subunit; Major path…	Cytoplasmic Ribosomal Proteins		3.99329e+06	4.5459e+06	4.10707e+06	2.02342e+06	3.46759e+06	2.74274e+06	3.21679e+06	1.34064e+06	2.93701e+06	3.04482e+06	2.33158e+06	1.40824e+06		21.9291	22.1161	21.9697	20.9484	21.7255	21.3872	21.6172	20.3545	21.4859	21.5379	21.1529	20.4255		2.78278	2.8326	2.68329	2.72806	2.96883	2.58649	2.57299	2.33427	2.82938	2.56172	2.40624	2.41778
Q8N9M1	Uncharacterized protein C19orf47	C19orf47				protein binding	19					147040	193079	216020	110059	142451	111763	153890	75650.4	155567	190369	143693	90091.3		17.1658	17.5588	17.7208	16.7479	17.1201	16.7701	17.2315	16.2071	17.2472	17.5384	17.1326	16.4591		-1.98052	-1.72471	-1.56558	-1.47239	-1.63657	-2.03061	-1.81267	-1.81316	-1.40936	-1.43776	-1.614	-1.54858
Q96CS3	FAS-associated factor 2	FAF2		cell organization and biogenesis;metabolic process;regulation of biological process;response to stimulus;transport	cytoplasm;endoplasmic reticulum;extracellular;organelle lumen	enzyme regulator activity;protein binding	5		Neutrophil degranulation			1.08619e+06	980283	739366	454487	658371	676960	578656	358700	280036	461479	514676	229123		20.0508	19.9028	19.4959	18.7939	19.3285	19.3687	19.1423	18.4524	18.0953	18.8159	18.9733	17.8058		0.90448	0.619299	0.209543	0.573579	0.571867	0.568014	0.0981403	0.432195	-0.561285	-0.1603	0.226675	-0.201919
Q96T88	E3 ubiquitin-protein ligase UHRF1	UHRF1		cell organization and biogenesis;cell proliferation;metabolic process;regulation of biological process;response to stimulus	nucleus	catalytic activity;DNA binding;metal ion binding;nucleotide binding;protein binding	19		DNA methylation	Pathways Affected in Adenoid Cystic Carcinoma		149481	77981.9	109135	58921.2	76775	66932.7	72864.1	47583	126120	157450	80049	84446.9		17.1896	16.2509	16.7357	15.8465	16.2283	16.0304	16.1529	15.5382	16.9444	17.2645	16.2886	16.3658		-1.95676	-3.03269	-2.55064	-2.3738	-2.52833	-2.77027	-2.89129	-2.48206	-1.71211	-1.71167	-2.45804	-1.64193
O00214	Galectin-8	LGALS8		metabolic process;response to stimulus	cytoplasm;cytosol;membrane	protein binding	1					178364	240873	204934	229870	126452	207642	136546	118399	122633	179914	111347	83129.2		17.4445	17.8779	17.6448	17.8105	16.9482	17.6637	17.059	16.8533	16.904	17.4569	16.7647	16.3431		-1.7019	-1.40563	-1.64159	-0.409839	-1.80845	-1.13696	-1.98518	-1.16693	-1.75255	-1.51926	-1.98193	-1.66461
Q14318	Peptidyl-prolyl cis-trans isomerase FKBP8	FKBP8		cell death;metabolic process;regulation of biological process;response to stimulus	cytoplasm;cytosol;endoplasmic reticulum;membrane;mitochondrion	catalytic activity;metal ion binding;protein binding	19		Ub-specific processing proteases	Senescence and Autophagy in Cancer		348690	314120	412279	38441.1	145492	181241	271215	39885.1	77970.3	131305	157100	58472.9		18.4116	18.261	18.6533	15.2304	17.1506	17.4675	18.0491	15.2836	16.2506	17.0026	17.2613	15.8355		-0.734777	-1.02259	-0.633126	-2.98994	-1.60609	-1.33315	-0.995126	-2.73666	-2.4059	-1.97364	-1.4853	-2.1722
P35658	Nuclear pore complex protein Nup214	NUP214		cell organization and biogenesis;cellular component movement;metabolic process;regulation of biological process;response to stimulus;transport	cytosol;nucleus	protein binding;structural molecule activity;transporter activity	9	Epstein-Barr virus infection; RNA transport	Rev-mediated nuclear export of HIV RNA; ISG15 antiviral mechanism; NEP/NS2 Interacts with the Cellular Export Machinery; tRNA processing in the nucleus; Transcriptional regulation by small RNAs; Nuclear Pore Complex (NPC) Disassembly; Regulation of Glucokinase by Glucokinase Regulatory Protein; Vpr-mediated nuclear import of PICs; Regulation of HSF1-mediated heat shock response; snRNP Assembly; S…	TGF-beta Signaling Pathway		388058	221849	1.18853e+06	253984	266067	330562	416586	128936	329263	445093	370761	188175		18.5659	17.7592	20.1807	17.9544	18.0214	18.3346	18.6683	16.9763	18.3289	18.7637	18.5001	17.5217		-0.58045	-1.52432	0.894362	-0.26592	-0.735247	-0.466135	-0.375949	-1.04393	-0.32766	-0.212457	-0.2465	-0.485965
P61803	Dolichyl-diphosphooligosaccharide--protein glycosyltransferase subunit DAD1	DAD1		cell death;metabolic process;regulation of biological process;response to stimulus	endoplasmic reticulum;membrane	catalytic activity	14	N-Glycan biosynthesis; Protein processing in endoplasmic reticulum; Metabolic pathways	Asparagine N-linked glycosylation			394166	285057	410705	56981.7	104978	170499	226713	122873	102230	112832	115424	77595		18.5884	18.1209	18.6477	15.7982	16.6797	17.3794	17.7905	16.9068	16.6415	16.7838	16.8166	16.2437		-0.55792	-1.16265	-0.638642	-2.42209	-2.07695	-1.42129	-1.2537	-1.11341	-2.01508	-2.19239	-1.93005	-1.76401
P57740	Nuclear pore complex protein Nup107	NUP107		cell organization and biogenesis;metabolic process;regulation of biological process;transport	chromosome;cytosol;membrane;nucleus	protein binding;structural molecule activity;transporter activity	12	RNA transport	Rev-mediated nuclear export of HIV RNA; ISG15 antiviral mechanism; NEP/NS2 Interacts with the Cellular Export Machinery; Separation of Sister Chromatids; tRNA processing in the nucleus; Transcriptional regulation by small RNAs; Nuclear Pore Complex (NPC) Disassembly; Regulation of Glucokinase by Glucokinase Regulatory Protein; Vpr-mediated nuclear import of PICs; Regulation of HSF1-mediated heat …	Gastric Cancer Network 1		1.911e+06	2.56198e+06	2.9665e+06	952684	1.60268e+06	1.64802e+06	1.84939e+06	762979	1.72234e+06	2.15712e+06	1.87799e+06	1.0763e+06		20.8659	21.2888	21.5003	19.8616	20.6121	20.6523	20.8186	19.5413	20.7159	21.0407	20.8408	20.0376		1.71954	2.00529	2.21394	1.64134	1.85538	1.8516	1.77441	1.52106	2.0594	2.06447	2.09413	2.02997
Q8NEY8	Periphilin-1	PPHLN1		metabolic process;regulation of biological process	chromosome;cytoplasm;cytosol;Golgi;nucleus	protein binding;RNA binding	12					1.47156e+06	1.30664e+06	1.45379e+06	518003	886827	879923	1.23297e+06	392267	1.33029e+06	1.23698e+06	1.0211e+06	542212		20.4889	20.3174	20.4714	18.9826	19.7583	19.747	20.2337	18.5815	20.3433	20.2384	19.9617	19.0485		1.34255	1.03389	1.185	0.762301	1.00162	0.946321	1.1895	0.561255	1.68677	1.26218	1.21506	1.04081
Q9Y3U8	60S ribosomal protein L36	RPL36		cell organization and biogenesis;metabolic process;transport	cytoplasm;cytosol;membrane;ribosome	RNA binding;structural molecule activity	19	Ribosome	Peptide chain elongation; Eukaryotic Translation Termination; Viral mRNA Translation; L13a-mediated translational silencing of Ceruloplasmin expression; Nonsense Mediated Decay (NMD) independent of the Exon Junction Complex (EJC); Selenocysteine synthesis; Nonsense Mediated Decay (NMD) enhanced by the Exon Junction Complex (EJC); GTP hydrolysis and joining of the 60S ribosomal subunit; Major path…	Cytoplasmic Ribosomal Proteins		2.89696e+06	2.75023e+06	2.1448e+06	1.22547e+06	1.93292e+06	1.95341e+06	2.12113e+06	633334	2.13257e+06	2.0638e+06	1.29867e+06	796758		21.4661	21.3911	21.0324	20.2249	20.8824	20.8976	21.0164	19.2726	21.0242	20.9769	20.3086	19.6038		2.31975	2.10758	1.74603	2.0046	2.12568	2.09687	1.9722	1.25239	2.36762	2.00067	1.56197	1.5961
Q9BVV7	Mitochondrial import inner membrane translocase subunit Tim21	TIMM21		cell organization and biogenesis;transport	membrane;mitochondrion	protein binding	18		Mitochondrial protein import; Metabolism of proteins			670146	487145	455219	329435	312650	355893	384594	283560	286803	437580	339669	240987		19.3541	18.894	18.7962	18.3296	18.2542	18.4411	18.553	18.1133	18.1297	18.7392	18.3738	17.8786		0.207754	-0.389548	-0.490185	0.109336	-0.502488	-0.359614	-0.491228	0.0930741	-0.526837	-0.237019	-0.37286	-0.129088
Q14739	Delta(14)-sterol reductase LBR	LBR		metabolic process	membrane;nucleus	catalytic activity;DNA binding;protein binding;RNA binding	1		Cholesterol biosynthesis	Gastric cancer network 2; ATM Signaling Network in Development and Disease		1.86564e+06	3.12452e+06	2.3653e+06	563139	1.40963e+06	1.41664e+06	2.00289e+06	398398	1.61966e+06	1.94331e+06	1.7336e+06	475820		20.8312	21.5752	21.1736	19.1031	20.4269	20.434	20.9337	18.6039	20.6273	20.8901	20.7253	18.8601		1.68488	2.29166	1.88721	0.882831	1.67021	1.63335	1.88945	0.58363	1.97072	1.91388	1.97871	0.852374
O95864	Acyl-CoA 6-desaturase	FADS2		metabolic process;transport	endoplasmic reticulum;membrane	catalytic activity	11	PPAR signaling pathway; Biosynthesis of unsaturated fatty acids; alpha-Linolenic acid metabolism; Fatty acid metabolism	Linoleic acid (LA) metabolism; alpha-linolenic acid (ALA) metabolism	PPAR signaling pathway		196997	272291	298775		76872	145405	187456		86012.2	107698	105116	52949.5		17.5878	18.0548	18.1887		16.2302	17.1497	17.5162		16.3923	16.7166	16.6816	15.6923		-1.55855	-1.22875	-1.09769		-2.5265	-1.65098	-1.52801		-2.26428	-2.25957	-2.06501	-2.31535
Q96P11	Probable 28S rRNA (cytosine-C(5))-methyltransferase	NSUN5		metabolic process	nucleus	catalytic activity;RNA binding	7					943837	1.2092e+06	1.02184e+06	181509	603390	580346	948900	113912	504675	722383	549382	151592		19.8482	20.2056	19.9627	17.4697	19.2027	19.1466	19.8559	16.7976	18.945	19.4624	19.0675	17.2098		0.701815	0.922088	0.676357	-0.750615	0.446056	0.345857	0.811692	-1.22266	0.288455	0.486198	0.32082	-0.797851
Q9C0B5	Palmitoyltransferase ZDHHC5	ZDHHC5		metabolic process	cytoplasm;membrane	catalytic activity;metal ion binding	11					210156	211417	128167		27567.3	77830.2	167874	23256.4	36746.6	145433	103149	22510.5		17.6811	17.6897	16.9677		14.7507	16.248	17.357	14.5053	15.1653	17.15	16.6544	14.4583		-1.46526	-1.59381	-2.31872		-4.006	-2.55265	-1.68719	-3.51488	-3.49122	-1.82622	-2.09227	-3.54937
O15173	Membrane-associated progesterone receptor component 2	PGRMC2		regulation of biological process;response to stimulus	membrane	protein binding;receptor activity;signal transducer activity	4					399641	343976	928991	185498	316093	409996	353075	108281	100340	277315	316494	88901.7		18.6083	18.3919	19.8253	17.501	18.27	18.6453	18.4296	16.7244	16.6145	18.0812	18.2718	16.4399		-0.538019	-0.891592	0.538919	-0.719257	-0.486687	-0.155445	-0.61459	-1.2958	-2.042	-0.895039	-0.474813	-1.56776
P60880	Synaptosomal-associated protein 25	SNAP25		cell communication;cell organization and biogenesis;metabolic process;regulation of biological process;response to stimulus;transport	cytoplasm;cytosol;extracellular;membrane	catalytic activity;metal ion binding;protein binding	20	Insulin secretion; Synaptic vesicle cycle	Glutamate Neurotransmitter Release Cycle; Neutrophil degranulation; Serotonin Neurotransmitter Release Cycle; Regulation of insulin secretion; Toxicity of botulinum toxin type C (BoNT/C); Norepinephrine Neurotransmitter Release Cycle; Toxicity of botulinum toxin type A (BoNT/A); Acetylcholine Neurotransmitter Release Cycle; Dopamine Neurotransmitter Release Cycle; Toxicity of botulinum toxin type…	Synaptic Vesicle Pathway; Insulin Signaling; Sudden Infant Death Syndrome (SIDS) Susceptibility Pathways		218879		242798			105741	117581		56094.7	54544.5				17.7398		17.8894			16.6902	16.8433		15.7756	15.7351				-1.40659		-1.39699			-2.11052	-2.20091		-2.88096	-3.24106
Q8IYS2	Uncharacterized protein KIAA2013	KIAA2013			membrane		1					245310	201063	374775	61691.2	160513	214943	176359	36559.7	71010.5	130388	116825	38515.3		17.9042	17.6173	18.5157	15.9128	17.2923	17.7136	17.4282	15.158	16.1157	16.9924	16.834	15.2331		-1.24211	-1.66625	-0.77072	-2.30752	-1.46435	-1.0871	-1.61605	-2.86226	-2.5408	-1.98376	-1.91264	-2.77454
Q16718	NADH dehydrogenase [ubiquinone] 1 alpha subcomplex subunit 5	NDUFA5		cell organization and biogenesis;metabolic process;transport	membrane;mitochondrion	catalytic activity;protein binding	7	Huntington's disease; Parkinson's disease; Alzheimer's disease; Oxidative phosphorylation; Non-alcoholic fatty liver disease (NAFLD); Metabolic pathways	Complex I biogenesis	Electron Transport Chain; Oxidative phosphorylation		258925	318240	286957	244422	251060	268975	277944	68849.3	232060	166083	67517.3			17.9822	18.2798	18.1305	17.899	17.9377	18.0371	18.0844	16.0712	17.8241	17.3415	16.043			-1.16419	-1.00378	-1.15591	-0.321283	-0.819002	-0.763582	-0.95977	-1.94907	-0.832398	-1.63466	-2.70366
P08195	4F2 cell-surface antigen heavy chain	SLC3A2		cell growth;cellular component movement;metabolic process;response to stimulus;transport	cell surface;cytosol;membrane;nucleus	catalytic activity;protein binding;RNA binding;transporter activity	11	Protein digestion and absorption; mTOR signaling pathway	Tryptophan catabolism; Basigin interactions; Amino acid transport across the plasma membrane			2.07828e+06	1.58608e+06	1.9087e+06	592524	994205	1.12715e+06	1.67378e+06	490952	877416	1.05569e+06	1.07677e+06	523035		20.987	20.597	20.8642	19.1765	19.9232	20.1042	20.6747	18.9052	19.7429	20.0098	20.0383	18.9965		1.84059	1.31349	1.57777	0.956213	1.16651	1.30355	1.63047	0.885001	1.08636	1.03355	1.29164	0.988867
Q7Z7H5	Transmembrane emp24 domain-containing protein 4	TMED4		regulation of biological process;response to stimulus;transport	endoplasmic reticulum;membrane	signal transducer activity	7					58156.6	328815	328216	53794.7	131129	155640	238814		106420	118644	143582	12675.3		15.8277	18.3269	18.3243	15.7152	17.0006	17.2479	17.8655		16.6994	16.8563	17.1315	13.6297		-3.31871	-0.956621	-0.962099	-2.50512	-1.75605	-1.55284	-1.17868		-1.95713	-2.11993	-1.61511	-4.37795
P63000	Ras-related C3 botulinum toxin substrate 1	RAC1		cell organization and biogenesis;cell proliferation;cellular component movement;coagulation;defense response;metabolic process;regulation of biological process;response to stimulus;transport	cytoplasm;cytosol;membrane	catalytic activity;nucleotide binding;protein binding	7	Viral carcinogenesis; Osteoclast differentiation; Pancreatic cancer; Neurotrophin signaling pathway; B cell receptor signaling pathway; VEGF signaling pathway; Rap1 signaling pathway; MAPK signaling pathway; Colorectal cancer; Natural killer cell mediated cytotoxicity; Pathways in cancer; AGE-RAGE signaling pathway in diabetic complications; Renal cell carcinoma; Phagosome; Pancreatic secretion; …	SEMA3A-Plexin repulsion signaling by inhibiting Integrin adhesion; Sema3A PAK dependent Axon repulsion; Rho GTPase cycle; FCERI mediated MAPK activation; MET activates RAP1 and RAC1; RHO GTPases activate CIT; Factors involved in megakaryocyte development and platelet production; PCP/CE pathway; Nef and signal transduction; RHO GTPases Activate NADPH Oxidases; Translocation of GLUT4 to the plasma …	Androgen receptor signaling pathway; Nucleotide-binding Oligomerization Domain (NOD) pathway; Regulation of toll-like receptor signaling pathway; Target Of Rapamycin (TOR) Signaling; Physiological and Pathological Hypertrophy of the Heart; MicroRNAs in cardiomyocyte hypertrophy; Integrin-mediated Cell Adhesion; RANKL/RANK (Receptor activator of NFKB (ligand)) Signaling Pathway; Leptin signaling p…		1.2365e+06	986636	1.34056e+06	798174	709237	883654	1.06324e+06	523940	607883	718308	620675	463238		20.2378	19.9122	20.3544	19.6063	19.4359	19.7531	20.02	18.999	19.2134	19.4542	19.2435	18.8214		1.09147	0.628619	1.06802	1.38604	0.679234	0.952425	0.975832	0.978819	0.556894	0.478038	0.496847	0.813712
Q56VL3	OCIA domain-containing protein 2	OCIAD2			endosome;membrane;mitochondrion		4					2.28546e+06	1.94907e+06	2.76211e+06	2.08277e+06	1.34615e+06	1872423	1.39422e+06	1.61971e+06	1.26426e+06	2.07461e+06	1.91392e+06	1.312e+06		21.1241	20.8944	21.3973	20.9901	20.3604	20.8365	20.411	20.6273	20.2699	20.9844	20.8681	20.3233		1.97769	1.61081	2.11095	2.76977	1.60373	2.03578	1.36682	2.60708	1.61332	2.0082	2.12147	2.31565
P29692	Elongation factor 1-delta	EEF1D		metabolic process;regulation of biological process;response to stimulus	cytoplasm;cytosol;endoplasmic reticulum;nucleus	DNA binding;protein binding;RNA binding;signal transducer activity	8; CHR_HSCHR8_3_CTG7	Herpes simplex infection	Eukaryotic Translation Elongation	Translation Factors		134141	158904	241627	81733.8	142777	142586	155042	28108.5	102950	155953	93617.3	48067.8		17.0334	17.2778	17.8824	16.3186	17.1234	17.1215	17.2423	14.7787	16.6516	17.2508	16.5145	15.5528		-2.11298	-2.00574	-1.40397	-1.90165	-1.63327	-1.67922	-1.80191	-3.2415	-2.00496	-1.72545	-2.23214	-2.4549
P82663	28S ribosomal protein S25, mitochondrial	MRPS25		cell organization and biogenesis;metabolic process	membrane;mitochondrion;ribosome	structural molecule activity	3		Mitochondrial translation initiation; Mitochondrial translation elongation; Mitochondrial translation termination			96429.5		90801	28104.6	40067	34675.6		34890	40118.6	61013.5		28630		16.5572		16.4704	14.7785	15.2901	15.0816		15.0905	15.292	15.8968		14.8052		-2.58918		-2.81597	-3.44178	-3.46655	-3.71906		-2.92969	-3.36455	-3.07936		-3.20244
P62820	Ras-related protein Rab-1A	RAB1A		cell organization and biogenesis;cellular component movement;defense response;metabolic process;regulation of biological process;response to stimulus;transport	cytoplasm;cytosol;endoplasmic reticulum;endosome;Golgi;membrane	catalytic activity;nucleotide binding;protein binding	2	Legionellosis	COPI-dependent Golgi-to-ER retrograde traffic; COPII (Coat Protein 2) Mediated Vesicle Transport; COPI-mediated anterograde transport; Golgi Cisternae Pericentriolar Stack Reorganization; RAB GEFs exchange GTP for GDP on RABs; RAB geranylgeranylation			1.10862e+06	1.15077e+06	1.7307e+06	617923	910078	944098	885806	497500	526033	595397	696484	332573		20.0803	20.1342	20.7229	19.2371	19.7956	19.8486	19.7566	18.9243	19.0048	19.1835	19.4097	18.3433		0.933971	0.850622	1.43654	1.01677	1.03895	1.04788	0.712426	0.904116	0.348253	0.207288	0.6631	0.33563
P26641	Elongation factor 1-gamma	EEF1G		metabolic process;response to stimulus	cytoplasm;cytosol;endoplasmic reticulum;membrane;nucleus	catalytic activity;protein binding;RNA binding	11	Legionellosis	Eukaryotic Translation Elongation	Translation Factors		521335	379761	702940	312821	364688	379712	418280	194073	436704	413862	280988	221946		18.9918	18.5347	19.423	18.255	18.4763	18.5345	18.6741	17.5662	18.7363	18.6588	18.1001	17.7598		-0.154513	-0.748806	0.136656	0.0346789	-0.280374	-0.266149	-0.370096	-0.453984	0.0797562	-0.317414	-0.646482	-0.247833
Q86V85	Integral membrane protein GPR180	GPR180		regulation of biological process;response to stimulus	membrane		13						122304	172232		68402.4	53861.3					76641.7				16.9001	17.394		16.0618	15.717					16.2258				-2.38343	-1.89239		-2.69491	-3.08374					-2.52079
O00571	ATP-dependent RNA helicase DDX3X	DDX3X		cell death;cell organization and biogenesis;defense response;metabolic process;regulation of biological process;response to stimulus;transport	cytoplasm;cytosol;extracellular;membrane;mitochondrion;nucleus;organelle lumen	catalytic activity;DNA binding;enzyme regulator activity;nucleotide binding;protein binding;RNA binding	X	Viral carcinogenesis; Hepatitis B; RIG-I-like receptor signaling pathway	Neutrophil degranulation	RIG-I-like Receptor Signaling		1.4144e+06	1.23844e+06	1.39266e+06	676412	990862	998628	979614	513163	1.04996e+06	1.17505e+06	1.08852e+06	540191		20.4318	20.2401	20.4094	19.3675	19.9183	19.9296	19.9019	18.9691	20.0019	20.1643	20.0539	19.0431		1.2854	0.956548	1.12303	1.14724	1.16165	1.12889	0.857649	0.948836	1.34537	1.18808	1.3073	1.03543
Q96QD8	Sodium-coupled neutral amino acid transporter 2	SLC38A2		cell communication;response to stimulus;transport	membrane	protein binding;transporter activity	12	Glutamatergic synapse; Protein digestion and absorption; GABAergic synapse	Amino acid transport across the plasma membrane; Glutamate Neurotransmitter Release Cycle	Endochondral Ossification		336358	537168	178847		156698	120458	302618			229425				18.3596	19.035	17.4484		17.2576	16.8782	18.2071			17.8077				-0.786723	-0.248525	-1.83802		-1.49905	-1.92252	-0.837066			-1.16854
P54886	Delta-1-pyrroline-5-carboxylate synthase	ALDH18A1		metabolic process	cytoplasm;cytosol;membrane;mitochondrion	catalytic activity;nucleotide binding;protein binding;RNA binding	10	Biosynthesis of amino acids; Metabolic pathways; Arginine and proline metabolism	Amino acid synthesis and interconversion (transamination)	Amino Acid metabolism; Urea cycle and metabolism of amino groups		120919	198988	158048	138520	74362.9	203282	64639.7	106245	76636.1	134472	73351.8	137741		16.8837	17.6023	17.27	17.0797	16.1823	17.6331	15.9801	16.697	16.2257	17.0369	16.1625	17.0716		-2.26268	-1.68122	-2.01638	-1.14057	-2.57438	-1.16757	-3.06407	-1.32319	-2.4308	-1.93926	-2.58409	-0.936088
Q96GC5	39S ribosomal protein L48, mitochondrial	MRPL48		cell organization and biogenesis;metabolic process	membrane;mitochondrion;ribosome	protein binding	11		Mitochondrial translation initiation; Mitochondrial translation elongation; Mitochondrial translation termination			259796	151360	268078	159988	139189	169059	160244	108997	84728.4	149653	219930	72523.1		17.987	17.2076	18.0323	17.2876	17.0867	17.3672	17.2899	16.7339	16.3706	17.1913	17.7467	16.1462		-1.15934	-2.07591	-1.25409	-0.932697	-1.66999	-1.43353	-1.75429	-1.2863	-2.28598	-1.78494	-0.999948	-1.86153
P18031	Tyrosine-protein phosphatase non-receptor type 1	PTPN1		cell organization and biogenesis;metabolic process;regulation of biological process;response to stimulus	cytoplasm;cytosol;endoplasmic reticulum;endosome;membrane	catalytic activity;metal ion binding;protein binding;RNA binding	20	Insulin signaling pathway; Adherens junction; Insulin resistance	Regulation of IFNA signaling; Negative regulation of MET activity; Regulation of IFNG signaling; PTK6 Down-Regulation; Integrin alphaIIb beta3 signaling; Growth hormone receptor signaling	Leptin signaling pathway; Prolactin Signaling Pathway; VEGFA-VEGFR2 Signaling Pathway; Angiopoietin Like Protein 8 Regulatory Pathway; Insulin Signaling		92368.4	75542	90628.1	39715.8	79558.1	82514.8	58415.7	13879.6	31717.5	101645	86826.9	10983		16.4951	16.205	16.4677	15.2774	16.2797	16.3324	15.8341	13.7607	14.953	16.6332	16.4059	13.423		-2.65125	-3.07855	-2.81872	-2.94288	-2.47695	-2.46833	-3.21014	-4.25955	-3.70355	-2.34302	-2.34078	-4.5847
P51991	Heterogeneous nuclear ribonucleoprotein A3	HNRNPA3		metabolic process;transport	cytoplasm;nucleus;spliceosomal complex	protein binding;RNA binding;transporter activity	2	Spliceosome	mRNA Splicing - Major Pathway			2.55033e+07	3.21823e+07	24691123	8.06372e+06	1.55529e+07	1.43268e+07	2.22066e+07	8.54799e+06	6.2474e+07	7.49607e+07	6.23617e+07	4.22366e+07		24.6042	24.9398	24.5575	22.943	23.8907	23.7722	24.4045	23.0272	25.8968	26.1596	25.8942	25.332		5.45782	5.65623	5.2711	4.72271	5.13401	4.97151	5.36028	5.00693	7.24021	7.18343	7.14752	7.32431
Q99735	Microsomal glutathione S-transferase 2	MGST2		metabolic process;regulation of biological process;response to stimulus	cytoplasm;endoplasmic reticulum;membrane	antioxidant activity;catalytic activity;enzyme regulator activity;protein binding	4	Glutathione metabolism; Metabolism of xenobiotics by cytochrome P450; Drug metabolism - cytochrome P450; Chemical carcinogenesis; Platinum drug resistance	Glutathione conjugation; Aflatoxin activation and detoxification	NRF2 pathway; Metapathway biotransformation		564585	785096	447895	98123.4	325371	389178	414829	72166.5	241499	353255	245079	81392.2		19.1068	19.5825	18.7728	16.5823	18.3117	18.5701	18.6622	16.139	17.8817	18.4303	17.9029	16.3126		-0.0395313	0.298969	-0.513585	-1.63799	-0.44495	-0.230625	-0.382049	-1.88118	-0.774883	-0.545856	-0.843743	-1.69508
Q6YHK3	CD109 antigen	CD109		metabolic process;regulation of biological process;transport	cell surface;extracellular;membrane	enzyme regulator activity;protein binding	6		Platelet degranulation ; Post-translational modification: synthesis of GPI-anchored proteins			185557	72063.7	107322	159487	76651	36660	130668	112359	60035.4	114253	101486	56403		17.5015	16.137	16.7116	17.2831	16.226	15.1619	16.9956	16.7778	15.8735	16.8019	16.6309	15.7835		-1.64486	-3.14656	-2.57481	-0.937218	-2.53066	-3.63878	-2.04865	-1.24247	-2.78301	-2.17433	-2.11571	-2.2242
P36957	Dihydrolipoyllysine-residue succinyltransferase component of 2-oxoglutarate dehydrogenase complex, mitochondrial	DLST		metabolic process	membrane;mitochondrion;nucleus;organelle lumen	catalytic activity	14	Citrate cycle (TCA cycle); Carbon metabolism; Lysine degradation; Metabolic pathways	Lysine catabolism; Glyoxylate metabolism and glycine degradation; Citric acid cycle (TCA cycle)	TCA Cycle and Deficiency of Pyruvate Dehydrogenase complex (PDHc); Amino Acid metabolism; TCA Cycle		371270	266635	528701	321001	208065	251506	330760	226274	150060	344098	325501	218319		18.5021	18.0245	19.0121	18.2922	17.6667	17.9402	18.3354	17.7877	17.1952	18.3925	18.3123	17.7361		-0.644252	-1.25903	-0.274293	0.0719179	-1.09	-0.860464	-0.708779	-0.232513	-1.46136	-0.583745	-0.434327	-0.271604
P51398	28S ribosomal protein S29, mitochondrial	DAP3		cell death;cell organization and biogenesis;metabolic process;regulation of biological process;response to stimulus	membrane;mitochondrion;ribosome	nucleotide binding;protein binding;RNA binding;structural molecule activity	1		Mitochondrial translation initiation; Mitochondrial translation elongation; Mitochondrial translation termination			268648	253831	444184	199953	187230	232510	210265	167999	101570	296597	188162	181543		18.0354	17.9535	18.7608	17.6093	17.5145	17.8269	17.6819	17.3581	16.6321	18.1781	17.5216	17.4699		-1.11101	-1.33003	-0.52559	-0.610997	-1.24222	-0.973763	-1.36235	-0.662126	-2.02443	-0.79806	-1.22501	-0.537733
O94880	PHD finger protein 14	PHF14		regulation of biological process	nucleus	metal ion binding;protein binding	7					960100	959786	752136	623094	697809	580312	708571	408351	585050	691540	544328	369064		19.8728	19.8724	19.5206	19.2491	19.4125	19.1465	19.4346	18.6394	19.1582	19.3995	19.0541	18.4935		0.726462	0.588814	0.234248	1.02879	0.655798	0.345773	0.390347	0.619227	0.501662	0.423247	0.307486	0.485827
Q8N4V1	Membrane magnesium transporter 1	MMGT1		transport	endoplasmic reticulum;endosome;Golgi;membrane	transporter activity	X		Miscellaneous transport and binding events			266430	284150	296926		104543	177405	191807		91350.8	171659	114027			18.0234	18.1163	18.1797		16.6737	17.4367	17.5493		16.4791	17.3892	16.799			-1.12297	-1.16724	-1.10664		-2.08294	-1.364	-1.49491		-2.17741	-1.58702	-1.94761
P10301	Ras-related protein R-Ras	RRAS		cell differentiation;regulation of biological process;response to stimulus	membrane	catalytic activity;nucleotide binding;protein binding	19	Tight junction; Phospholipase D signaling pathway; Rap1 signaling pathway; MAPK signaling pathway; HTLV-I infection; Proteoglycans in cancer; Regulation of actin cytoskeleton; Ras signaling pathway; Axon guidance; cAMP signaling pathway	Sema4D mediated inhibition of cell attachment and migration; SEMA3A-Plexin repulsion signaling by inhibiting Integrin adhesion; CREB phosphorylation through the activation of Ras	G Protein Signaling Pathways; Canonical and Non-canonical Notch signaling; MAPK and NFkB Signalling Pathways Inhibited by Yersinia YopJ; T-Cell antigen Receptor (TCR) pathway during Staphylococcus aureus infection; MAPK Cascade; Regulation of Actin Cytoskeleton		522498	380256	552303	350541	301259	303813	452010	242816	351083	252827	349604	199338		18.9951	18.5366	19.0751	18.4192	18.2006	18.2128	18.786	17.8895	18.4215	17.9478	18.4154	17.6049		-0.151297	-0.746928	-0.211285	0.198923	-0.556028	-0.587871	-0.258211	-0.130718	-0.235088	-1.02841	-0.331268	-0.402822
Q9NW64	Pre-mRNA-splicing factor RBM22	RBM22		cell organization and biogenesis;metabolic process;regulation of biological process;response to stimulus;transport	cytoplasm;nucleus;spliceosomal complex	metal ion binding;nucleotide binding;protein binding;RNA binding;transporter activity	5	Spliceosome	mRNA Splicing - Major Pathway			910021	1.3977e+06	1.10917e+06	581521	735639	749237	885571	501512	1.11514e+06	1.02319e+06	1.01541e+06	679085		19.7955	20.4146	20.0811	19.1495	19.4886	19.5151	19.7562	18.9359	20.0888	19.9646	19.9536	19.3732		0.649178	1.13108	0.794664	0.929173	0.731963	0.714367	0.712044	0.915703	1.43225	0.988441	1.207	1.36555
Q14683	Structural maintenance of chromosomes protein 1A	SMC1A		cell division;cell organization and biogenesis;metabolic process;regulation of biological process;response to stimulus	chromosome;cytosol;nucleus	nucleotide binding;protein binding;RNA binding	X	Oocyte meiosis; Cell cycle	Meiotic synapsis; Separation of Sister Chromatids; Resolution of Sister Chromatid Cohesion; Cohesin Loading onto Chromatin; Establishment of Sister Chromatid Cohesion; SUMOylation of DNA damage response and repair proteins	miRNA Regulation of DNA Damage Response; Cell Cycle; Retinoblastoma (RB) in Cancer; Constitutive Androstane Receptor Pathway; Pathways Affected in Adenoid Cystic Carcinoma; ATM Signaling Network in Development and Disease; mRNA Processing; DNA Damage Response		3.90426e+06	5.03327e+06	5.57035e+06	4.03131e+06	3.48645e+06	3.32616e+06	2.56424e+06	3.43656e+06	2.77506e+06	3.97004e+06	3.87101e+06	3.20196e+06		21.8966	22.2631	22.4093	21.9428	21.7333	21.6654	21.2901	21.7125	21.4041	21.9207	21.8843	21.6105		2.75025	2.97953	3.12295	3.72252	2.97665	2.86473	2.2459	3.69231	2.74755	2.94452	3.13765	3.60284
P62879	Guanine nucleotide-binding protein G(I)/G(S)/G(T) subunit beta-2	GNB2		metabolic process;regulation of biological process;response to stimulus	cytoplasm;cytosol;membrane	catalytic activity;protein binding;signal transducer activity	7	Dopaminergic synapse; Serotonergic synapse; Glutamatergic synapse; Circadian entrainment; Morphine addiction; Pathways in cancer; Retrograde endocannabinoid signaling; GABAergic synapse; Alcoholism; Ras signaling pathway; Chemokine signaling pathway; Cholinergic synapse; PI3K-Akt signaling pathway	G alpha (z) signalling events; Activation of G protein gated Potassium channels; Cooperation of PDCL (PhLP1) and TRiC/CCT in G-protein beta folding; Glucagon-type ligand receptors; Thromboxane signalling through TP receptor; ADP signalling through P2Y purinoceptor 1; G beta:gamma signalling through PI3Kgamma; Vasopressin regulates renal water homeostasis via Aquaporins; G-protein activation; Inhi…	Corticotropin-releasing hormone signaling pathway; Myometrial Relaxation and Contraction Pathways; G Protein Signaling Pathways; Chemokine signaling pathway; Focal Adhesion-PI3K-Akt-mTOR-signaling pathway; Calcium Regulation in the Cardiac Cell		1.9731e+06	1.33574e+06	1.94051e+06	1.58972e+06	1.18694e+06	1.16383e+06	1.41761e+06	1.00843e+06	1.13817e+06	1.14633e+06	1.10677e+06	860247		20.912	20.3492	20.888	20.6003	20.1788	20.1504	20.435	19.9437	20.1183	20.1286	20.0779	19.7144		1.76567	1.06567	1.60162	2.38004	1.42214	1.34975	1.39083	1.92346	1.46174	1.15238	1.33129	1.70671
Q9UHA3	Probable ribosome biogenesis protein RLP24	RSL24D1		cell organization and biogenesis;metabolic process	nucleus;ribosome	protein binding;RNA binding;structural molecule activity	15	Ribosome				3.42973e+06	3.2418e+06	2.97736e+06	1.61422e+06	2.07267e+06	2.27624e+06	2.67415e+06	1.33784e+06	3.7378e+06	3.89781e+06	2.77166e+06	1.87303e+06		21.7097	21.6284	21.5056	20.6224	20.9831	21.1182	21.3506	20.3515	21.8338	21.8942	21.4023	20.8369		2.5633	2.34482	2.21922	2.40211	2.22638	2.31752	2.30644	2.33125	3.17722	2.91803	2.65569	2.82926
Q9H9B4	Sideroflexin-1	SFXN1		cell differentiation;transport	membrane;mitochondrion	transporter activity	5					5.48961e+06	6.4139e+06	5.85957e+06	3.75805e+06	3.79962e+06	4.32627e+06	4.28915e+06	3130979	3.27894e+06	4.13785e+06	3.88464e+06	2.72133e+06		22.3883	22.6128	22.4824	21.8416	21.8574	22.0447	22.0323	21.5782	21.6448	21.9805	21.8894	21.3759		3.24191	3.32923	3.19598	3.62125	3.10075	3.244	2.98806	3.55796	2.98826	3.00425	3.14272	3.3682
Q9H307	Pinin											3.24333e+06	5.17623e+06	3.72356e+06	1.50492e+06	2.3127e+06	2.59843e+06	3.01106e+06	1.46606e+06	3.22421e+06	3.65825e+06	2.65573e+06	1.76682e+06		21.629	22.3035	21.8283	20.5213	21.1411	21.3092	21.5218	20.4835	21.6205	21.8027	21.3407	20.7527		2.48268	3.01993	2.54186	2.30095	2.38447	2.50851	2.47764	2.46329	2.96397	2.82652	2.59405	2.74504
O14684	Prostaglandin E synthase	PTGES		defense response;metabolic process;regulation of biological process;response to stimulus	cytoplasm;membrane	catalytic activity	9	Arachidonic acid metabolism; Metabolic pathways	Synthesis of Prostaglandins (PG) and Thromboxanes (TX)	Eicosanoid Synthesis		450686	812046	618142	272160	529028	449314	339592	196124	296594	350298	372989	146409		18.7818	19.6312	19.2376	18.0541	19.013	18.7774	18.3734	17.5814	18.1781	18.4182	18.5088	17.1596		-0.364601	0.347662	-0.0488064	-0.166207	0.25631	-0.0233304	-0.67076	-0.438815	-0.478411	-0.557982	-0.237857	-0.848037
Q9BYD3	39S ribosomal protein L4, mitochondrial	MRPL4		cell organization and biogenesis;metabolic process	membrane;mitochondrion;ribosome	protein binding;RNA binding;structural molecule activity	19	Ribosome	Mitochondrial translation initiation; Mitochondrial translation elongation; Mitochondrial translation termination			62006.7	142537	143080	45243.1	39917.3	104410	91009.2	34917.7	54886.8	160251	82736.3	37833.9		15.9201	17.121	17.1265	15.4654	15.2847	16.6719	16.4737	15.0917	15.7442	17.29	16.3362	15.2074		-3.22623	-2.16256	-2.15992	-2.75489	-3.47195	-2.12879	-2.57048	-2.92855	-2.91237	-1.68623	-2.4104	-2.80029
P33993	DNA replication licensing factor MCM7	MCM7		cell proliferation;metabolic process;regulation of biological process;response to stimulus	chromosome;cytosol;membrane;nucleus	catalytic activity;DNA binding;nucleotide binding;protein binding	7	DNA replication; Cell cycle	M/G1 Transition; Assembly of the pre-replicative complex; Unwinding of DNA; Regulation of DNA replication; Activation of ATR in response to replication stress; Activation of the pre-replicative complex; Orc1 removal from chromatin; Removal of licensing factors from origins	miRNA Regulation of DNA Damage Response; Cell Cycle; Retinoblastoma (RB) in Cancer; G1 to S cell cycle control; DNA Replication		626221	606921	466108	294035	377426	331079	319409	333956	297379	259472	260223	281841		19.2563	19.2111	18.8303	18.1656	18.5258	18.3368	18.285	18.3493	18.1819	17.9852	17.9894	18.1045		0.10995	-0.0723909	-0.456083	-0.0546697	-0.230839	-0.463878	-0.759161	0.329076	-0.474594	-0.990987	-0.757245	0.0968387
P52435	DNA-directed RNA polymerase II subunit RPB11-a	POLR2J		metabolic process;regulation of biological process;response to stimulus	nucleus	catalytic activity;DNA binding;protein binding	7	Epstein-Barr virus infection; Huntington's disease; Purine metabolism; RNA polymerase; Metabolic pathways; Pyrimidine metabolism	Signaling by FGFR2 IIIa TM; RNA polymerase II transcribes snRNA genes; Abortive elongation of HIV-1 transcript in the absence of Tat; Tat-mediated HIV elongation arrest and recovery; Activation of anterior HOX genes in hindbrain development during early embryogenesis; Formation of HIV-1 elongation complex containing HIV-1 Tat; MicroRNA (miRNA) biogenesis; Formation of the HIV-1 Early Elongation C…	Eukaryotic Transcription Initiation		72916.6	78770.9	40386.9	25403.2	33537.6	36528.5	81880.7	13346.3		103237	35474.7	15305.8		16.154	16.2654	15.3016	14.6327	15.0335	15.1567	16.3212	13.7042		16.6556	15.1145	13.9018		-2.9924	-3.01816	-3.98479	-3.58758	-3.72318	-3.64396	-2.72297	-4.31607		-2.32061	-3.63213	-4.10589
Q00610	Clathrin heavy chain 1	CLTC		cell differentiation;cell division;cell organization and biogenesis;cellular component movement;metabolic process;regulation of biological process;response to stimulus;transport	cytoplasm;cytoskeleton;cytosol;endosome;membrane;vacuole	protein binding;RNA binding;structural molecule activity	17	Lysosome; Endocytosis; Huntington's disease; Endocrine and other factor-regulated calcium reabsorption; Bacterial invasion of epithelial cells; Synaptic vesicle cycle	Cargo recognition for clathrin-mediated endocytosis; Formation of annular gap junctions; Golgi Associated Vesicle Biogenesis; Recycling pathway of L1; LDL clearance; Lysosome Vesicle Biogenesis; EPH-ephrin mediated repulsion of cells; Entry of Influenza Virion into Host Cell via Endocytosis; Retrograde neurotrophin signalling; VLDLR internalisation and degradation; WNT5A-dependent internalization…	Synaptic Vesicle Pathway; VEGFA-VEGFR2 Signaling Pathway; Complement and Coagulation Cascades		2.31579e+06	3.52909e+06	2.67731e+06	1.15577e+06	1.78409e+06	1.7526e+06	2.47556e+06	947401	1.85872e+06	1.91533e+06	2.20652e+06	1.3278e+06		21.1431	21.7509	21.3524	20.1404	20.7668	20.7411	21.2393	19.8536	20.8259	20.8692	21.0733	20.3406		1.99671	2.46732	2.06597	1.92012	2.01008	1.94037	2.19512	1.83339	2.16934	1.89295	2.32671	2.33293
P01112	GTPase HRas	HRAS		cell communication;cell death;cell differentiation;cell organization and biogenesis;cell proliferation;cellular component movement;defense response;metabolic process;regulation of biological process;response to stimulus;transport	cytoplasm;cytosol;Golgi;membrane;mitochondrion;nucleus	catalytic activity;nucleotide binding;protein binding	11; CHR_HSCHR11_1_CTG8	Viral carcinogenesis; Serotonergic synapse; Endocytosis; Longevity regulating pathway - multiple species; T cell receptor signaling pathway; Tight junction; Hepatitis B; Insulin signaling pathway; Central carbon metabolism in cancer; FoxO signaling pathway; Prolactin signaling pathway; MicroRNAs in cancer; Phospholipase D signaling pathway; Chronic myeloid leukemia; Neurotrophin signaling pathway…	Regulation of RAS by GAPs; SHC-mediated cascade:FGFR4; Signaling by FGFR4 in disease; FRS-mediated FGFR4 signaling; SHC1 events in ERBB4 signaling; NCAM signaling for neurite out-growth; DAP12 signaling; GRB2 events in EGFR signaling; Signaling by BRAF and RAF fusions; Constitutive Signaling by EGFRvIII; Signaling by RAS mutants; CD209 (DC-SIGN) signaling; Signaling by high-kinase activity BRAF m…	Integrin-mediated Cell Adhesion; Human Thyroid Stimulating Hormone (TSH) signaling pathway; Leptin signaling pathway; Prolactin Signaling Pathway; Signaling Pathways in Glioblastoma; RalA downstream regulated genes; B Cell Receptor Signaling Pathway; TNF alpha Signaling Pathway; Interleukin-11 Signaling Pathway; Oncostatin M Signaling Pathway; Brain-Derived Neurotrophic Factor (BDNF) signaling pa…		435495	174039	547495	338190	218621	347494	259893	153886	111703	234378	254439	218974		18.7323	17.4091	19.0625	18.3675	17.7381	18.4066	17.9876	17.2315	16.7693	17.8385	17.957	17.7404		-0.414068	-1.87449	-0.223901	0.147173	-1.0186	-0.394067	-1.05665	-0.788718	-1.88723	-1.13773	-0.789668	-0.267282
Q2TAY7	WD40 repeat-containing protein SMU1	SMU1		cell organization and biogenesis;metabolic process;regulation of biological process	cytoplasm;nucleus;spliceosomal complex	protein binding	9					1.28363e+06	2.64244e+06	1.92912e+06	552961	923510	1.14778e+06	1.80008e+06	460125	1.38555e+06	2.01082e+06	1.37439e+06	716682		20.2918	21.3334	20.8795	19.0768	19.8168	20.1304	20.7796	18.8117	20.402	20.9394	20.3904	19.451		1.14543	2.0499	1.59313	0.856517	1.06009	1.32971	1.73542	0.791443	1.74549	1.96315	1.64372	1.44329
Q92604	Acyl-CoA:lysophosphatidylglycerol acyltransferase 1	LPGAT1		metabolic process;regulation of biological process	cytoplasm;endoplasmic reticulum;membrane	catalytic activity	1	Glycerophospholipid metabolism	Acyl chain remodelling of PG			358459	284390	348430		115081	173203	289089				141986			18.4514	18.1175	18.4105		16.8123	17.4021	18.1412				17.1154			-0.694916	-1.16603	-0.875877		-1.94438	-1.39859	-0.903051				-1.63124
P08582	Melanotransferrin	MFI2; MELTF		metabolic process;regulation of biological process;transport	cell surface;extracellular;membrane;organelle lumen	metal ion binding;protein binding	3		Post-translational protein phosphorylation; Regulation of Insulin-like Growth Factor (IGF) transport and uptake by Insulin-like Growth Factor Binding Proteins (IGFBPs); Post-translational modification: synthesis of GPI-anchored proteins			49042.9	50283.9	114906	110287	64576	36847.2	47047.8	55654.5	54031.2	42045.1	45067.4	36246.8		15.5818	15.6178	16.8101	16.7509	15.9787	15.1693	15.5218	15.7642	15.7215	15.3596	15.4598	15.1456		-3.56461	-3.66573	-2.47629	-1.46939	-2.77796	-3.63143	-3.52237	-2.25601	-2.93503	-3.61656	-3.28684	-2.86212
Q96EP5	DAZ-associated protein 1	DAZAP1		cell differentiation;cell proliferation;development;regulation of biological process	cytoplasm;cytosol;nucleus	protein binding;RNA binding	19	mRNA surveillance pathway				969709	1.19095e+06	1.03108e+06	210399	501309	507846	1.00485e+06	224107	888343	1.20524e+06	884643	365657		19.8872	20.1837	19.9757	17.6828	18.9353	18.954	19.9385	17.7738	19.7608	20.2009	19.7547	18.4801		0.74083	0.900147	0.689333	-0.537532	0.178666	0.153336	0.894341	-0.246394	1.10422	1.22469	1.0081	0.472449
P83881	60S ribosomal protein L36a	RPL36A		cell organization and biogenesis;metabolic process;transport	cytoplasm;cytosol;membrane;ribosome	protein binding;RNA binding;structural molecule activity	X	Ribosome	Peptide chain elongation; Eukaryotic Translation Termination; Viral mRNA Translation; L13a-mediated translational silencing of Ceruloplasmin expression; Nonsense Mediated Decay (NMD) independent of the Exon Junction Complex (EJC); Selenocysteine synthesis; Nonsense Mediated Decay (NMD) enhanced by the Exon Junction Complex (EJC); GTP hydrolysis and joining of the 60S ribosomal subunit; Major path…	Cytoplasmic Ribosomal Proteins		2.44202e+06	2.40102e+06	2.31422e+06	1.0537e+06	1.66227e+06	1406955	2.03001e+06	944333	1.65168e+06	1.66155e+06	1.47372e+06	746344		21.2196	21.1952	21.1421	20.007	20.6647	20.4241	20.9531	19.8489	20.6555	20.6641	20.491	19.5095		2.07328	1.91167	1.85571	1.78673	1.90805	1.62345	1.90885	1.82871	1.99896	1.68789	1.7444	1.5018
P16070	CD44 antigen	CD44		cell organization and biogenesis;cellular component movement;metabolic process;regulation of biological process;response to stimulus;transport	cell surface;cytosol;Golgi;membrane	protein binding;receptor activity;signal transducer activity	11	Hematopoietic cell lineage; MicroRNAs in cancer; Epstein-Barr virus infection; Proteoglycans in cancer; ECM-receptor interaction; Shigellosis	Integrin cell surface interactions; Degradation of the extracellular matrix; Neutrophil degranulation; Hyaluronan uptake and degradation; Interferon gamma signaling; Cell surface interactions at the vascular wall	Hepatitis C and Hepatocellular Carcinoma; Wnt Signaling Pathway and Pluripotency; Senescence and Autophagy in Cancer		2.46186e+06	2.27711e+06	2.65072e+06	2.13154e+06	1.68895e+06	1.6931e+06	2.11356e+06	1.3803e+06	1.20907e+06	1.47292e+06	1.48087e+06	1.066e+06		21.2313	21.1188	21.338	21.0235	20.6877	20.6912	21.0112	20.3965	20.2055	20.4902	20.498	20.0238		2.08495	1.83523	2.05157	2.80316	1.93102	1.89054	1.96704	2.37632	1.54892	1.51404	1.75138	2.01609
P62266	40S ribosomal protein S23	RPS23		cell organization and biogenesis;metabolic process;transport	cytosol;membrane;ribosome	protein binding;RNA binding;structural molecule activity	5	Ribosome	Peptide chain elongation; Eukaryotic Translation Termination; Viral mRNA Translation; Formation of the ternary complex, and subsequently, the 43S complex; L13a-mediated translational silencing of Ceruloplasmin expression; Selenocysteine synthesis; Nonsense Mediated Decay (NMD) independent of the Exon Junction Complex (EJC); Nonsense Mediated Decay (NMD) enhanced by the Exon Junction Complex (EJC)…	Cytoplasmic Ribosomal Proteins		5.06121e+06	4.15037e+06	4.9138e+06	1.84444e+06	2.97392e+06	2.9054e+06	4.30081e+06	1.46887e+06	3.41292e+06	3.33534e+06	2.88478e+06	1.48668e+06		22.2711	21.9848	22.2284	20.8148	21.5039	21.4703	22.0362	20.4863	21.7026	21.6694	21.46	20.5037		3.12469	2.70127	2.94202	2.59445	2.74726	2.66961	2.99197	2.46605	3.04603	2.6932	2.7134	2.49598
Q13505	Metaxin-1											409666	539694	591933	204801	361955	316226	399358	176501	414015	539082	375943	196036		18.6441	19.0418	19.1751	17.6439	18.4655	18.2706	18.6073	17.4293	18.6593	19.0401	18.5202	17.5808		-0.502274	-0.241759	-0.111312	-0.576436	-0.291222	-0.530098	-0.436883	-0.590902	0.00278354	0.0639401	-0.226476	-0.426922
Q9UH99	SUN domain-containing protein 2	SUN2		cell organization and biogenesis;cellular component movement;regulation of biological process;transport	chromosome;endosome;membrane;nucleus	protein binding	22		Meiotic synapsis			164114	269362	129423	86391.3	104196	115775	191936	55697.6	144731	165939	110883	71386.9		17.3243	18.0392	16.9817	16.3986	16.6689	16.821	17.5503	15.7653	17.143	17.3403	16.7587	16.1234		-1.82203	-1.24435	-2.30465	-1.8217	-2.08773	-1.97973	-1.49394	-2.2549	-1.51353	-1.63591	-1.98795	-1.88431
Q07157	Tight junction protein ZO-1	TJP1		cell communication;cell organization and biogenesis;regulation of biological process;response to stimulus	cytoplasm;cytosol;membrane	protein binding	15	Tight junction; Gap junction; Salmonella infection; Adherens junction; Vibrio cholerae infection; Epithelial cell signaling in Helicobacter pylori infection	c-src mediated regulation of Cx43 function and closure of gap junctions; Signaling by Hippo; RUNX1 regulates expression of components of tight junctions; Apoptotic cleavage of cell adhesion proteins			327995	1.64416e+06	1.57558e+06	576880	745173	728197	667565	290060	865860	819139	555038	504322		18.3233	20.6489	20.5875	19.1379	19.5072	19.474	19.3485	18.146	19.7238	19.6437	19.0822	18.944		-0.823047	1.36538	1.30107	0.917611	0.75054	0.673274	0.304344	0.125768	1.06723	0.667543	0.335596	0.936302
Q8NDD1	Uncharacterized protein C1orf131											317887	266250	301820	157089	215207	177756	214187	144822	244890	343003	157065	100599		18.2782	18.0224	18.2033	17.2612	17.7154	17.4395	17.7085	17.1439	17.9018	18.3879	17.261	16.6183		-0.868211	-1.26112	-1.08306	-0.959074	-1.04131	-1.36115	-1.3357	-0.8763	-0.754762	-0.588343	-1.48563	-1.38942
Q9NPL8	Complex I assembly factor TIMMDC1, mitochondrial	TIMMDC1		cell organization and biogenesis	membrane;mitochondrion;nucleus	protein binding	3		Complex I biogenesis			437566	80286.6	314741	106784	98196.9	100060	144244	168110	190263	255867	207327	183637		18.7391	16.2929	18.2638	16.7043	16.5834	16.6105	17.1382	17.359	17.5376	17.965	17.6616	17.4865		-0.407223	-2.99067	-1.02258	-1.51596	-2.17329	-2.19019	-1.90605	-0.66118	-1.1189	-1.01117	-1.08508	-0.521186
P50416	Carnitine O-palmitoyltransferase 1, liver isoform	CPT1A		cell differentiation;cell organization and biogenesis;metabolic process;regulation of biological process;response to stimulus;transport	membrane;mitochondrion	catalytic activity;protein binding	11	Fatty acid degradation; PPAR signaling pathway; Glucagon signaling pathway; AMPK signaling pathway; Insulin resistance; Adipocytokine signaling pathway; Fatty acid metabolism	RORA activates gene expression; Signaling by Retinoic Acid; Import of palmitoyl-CoA into the mitochondrial matrix; PPARA activates gene expression	AMP-activated Protein Kinase (AMPK) Signaling; Fatty Acid Beta Oxidation; PPAR Alpha Pathway; Mitochondrial LC-Fatty Acid Beta-Oxidation; Leptin and adiponectin; PPAR signaling pathway; Sudden Infant Death Syndrome (SIDS) Susceptibility Pathways		223013	417124	205575	33879.2	128294	165600	209999	29014.4	91668.2	163375	143039	22242		17.7668	18.6701	17.6493	15.0481	16.9691	17.3373	17.68	14.8245	16.4841	17.3178	17.126	14.441		-1.37959	-0.613421	-1.63708	-3.17219	-1.78758	-1.46335	-1.36418	-3.19574	-2.17241	-1.65837	-1.62058	-3.56668
P63173	60S ribosomal protein L38	RPL38		cell organization and biogenesis;metabolic process;regulation of biological process;transport	cytosol;ribosome	RNA binding;structural molecule activity	17	Ribosome	Peptide chain elongation; Eukaryotic Translation Termination; Viral mRNA Translation; L13a-mediated translational silencing of Ceruloplasmin expression; Nonsense Mediated Decay (NMD) independent of the Exon Junction Complex (EJC); Selenocysteine synthesis; Nonsense Mediated Decay (NMD) enhanced by the Exon Junction Complex (EJC); GTP hydrolysis and joining of the 60S ribosomal subunit; Major path…	Mesodermal Commitment Pathway; Cytoplasmic Ribosomal Proteins		1.49583e+06	1.14605e+06	1.23131e+06	106539	176705	566599	655087	632202	342169	919082	743209	542505		20.5125	20.1282	20.2318	16.701	17.431	19.112	19.3213	19.27	18.3843	19.8098	19.5034	19.0493		1.36615	0.844699	0.945375	-1.51928	-1.32569	0.311274	0.277122	1.24981	-0.27219	0.833628	0.756778	1.04159
Q9NXW2	DnaJ homolog subfamily B member 12	DNAJB12		cell organization and biogenesis;metabolic process;response to stimulus	endoplasmic reticulum;membrane	protein binding	10					407596	551177	472820		197881	236425	358271		248777	254267	372910	180633		18.6368	19.0722	18.8509		17.5943	17.851	18.4507		17.9245	17.956	18.5085	17.4627		-0.509581	-0.211383	-0.435455		-1.1624	-0.949676	-0.593513		-0.732049	-1.02022	-0.238164	-0.544982
P69905	Hemoglobin subunit alpha	HBA2; HBA1		cell organization and biogenesis;metabolic process;regulation of biological process;response to stimulus;transport	cytosol;extracellular;membrane;organelle lumen	antioxidant activity;catalytic activity;metal ion binding;protein binding;transporter activity	16	Malaria; African trypanosomiasis	Scavenging of heme from plasma; Erythrocytes take up carbon dioxide and release oxygen; Erythrocytes take up oxygen and release carbon dioxide	Selenium Micronutrient Network; Vitamin B12 Metabolism; Folate Metabolism; Effects of Nitric Oxide		2.80315e+06	1.61602e+06	1450694	1.91882e+06	1.87021e+06	681555	1.4108e+06	1.51472e+06	2.16895e+06	876122	1.20729e+06	1.54482e+06		21.4186	20.624	20.4683	20.8718	20.8348	19.3785	20.4281	20.5306	21.0486	19.7408	20.2033	20.559		2.27225	1.34048	1.18193	2.65149	2.0781	0.577774	1.38387	2.5104	2.39203	0.764567	1.45671	2.55133
Q12824	SWI/SNF-related matrix-associated actin-dependent regulator of chromatin subfamily B member 1	SMARCB1		cell differentiation;cell organization and biogenesis;metabolic process;regulation of biological process;response to stimulus	chromosome;nucleus	DNA binding;protein binding	22; CHR_HSCHR22_1_CTG7		RUNX1 interacts with co-factors whose precise effect on RUNX1 targets is not known; RMTs methylate histone arginines			203798	328822	236410		124127	147894	179135		163856	159800	222213	106521		17.6368	18.3269	17.8509		16.9215	17.1742	17.4507		17.3221	17.2859	17.7616	16.7008		-1.50958	-0.956591	-1.43545		-1.83522	-1.62649	-1.59351		-1.33447	-1.6903	-0.985049	-1.3069
Q9HC07	Transmembrane protein 165	TMEM165		cellular homeostasis;metabolic process;transport	endosome;Golgi;membrane;vacuole		4					363108	452630	383451	22988.3	133414	288871	409952	14908.8	78427.1	180326	120158	24776.3		18.47	18.788	18.5487	14.4886	17.0256	18.1401	18.6451	13.8639	16.2591	17.4602	16.8746	14.5967		-0.676322	-0.495566	-0.737703	-3.73169	-1.73112	-0.660628	-0.39911	-4.15635	-2.39748	-1.51596	-1.87205	-3.41101
Q99848	Probable rRNA-processing protein EBP2	EBNA1BP2		metabolic process	nucleus	protein binding;RNA binding	1		Major pathway of rRNA processing in the nucleolus and cytosol			4.28951e+06	4.34779e+06	4.76346e+06	2.99177e+06	4.04037e+06	2.9619e+06	3.14447e+06	2.02967e+06	3.75644e+06	3.85539e+06	2.99343e+06	2.0904e+06		22.0324	22.0519	22.1836	21.5126	21.9461	21.4981	21.5844	20.9528	21.8409	21.8784	21.5134	20.9953		2.88602	2.76831	2.89719	3.29227	3.18938	2.69739	2.54018	2.93259	3.1844	2.90224	2.76674	2.98766
O60828	Polyglutamine-binding protein 1	PQBP1		cell division;cell organization and biogenesis;defense response;metabolic process;regulation of biological process;response to stimulus	cytoplasm;cytosol;membrane;nucleus;spliceosomal complex	DNA binding;protein binding	X	Spliceosome	mRNA Splicing - Major Pathway			208346	267314	247908	93911.4	165249	195767	239168	40747.9	240942	279176	224981	90260.2		17.6686	18.0282	17.9194	16.519	17.3343	17.5788	17.8677	15.3144	17.8783	18.0908	17.7794	16.4618		-1.47774	-1.25536	-1.36694	-1.70129	-1.42239	-1.22192	-1.17654	-2.70578	-0.778213	-0.885389	-0.96719	-1.54588
Q9UBM7	7-dehydrocholesterol reductase	DHCR7		cell differentiation;metabolic process;regulation of biological process	cytosol;endoplasmic reticulum;membrane	catalytic activity;nucleotide binding	11	Steroid biosynthesis; Metabolic pathways	Cholesterol biosynthesis via desmosterol; Cholesterol biosynthesis via lathosterol; Activation of gene expression by SREBF (SREBP)	Vitamin D Metabolism; Cholesterol Biosynthesis		1.83366e+06	2.46142e+06	3.18861e+06	932159	1.79716e+06	1.84569e+06	1.45042e+06	770374	1.83024e+06	1.95835e+06	1.99341e+06	1.12432e+06		20.8063	21.2311	21.6045	19.8302	20.7773	20.8157	20.468	19.5552	20.8036	20.9012	20.9268	20.1006		1.65993	1.94752	2.31811	1.60992	2.02061	2.01503	1.42383	1.53498	2.14706	1.925	2.18017	2.09294
P55081	Microfibrillar-associated protein 1	MFAP1		cell organization and biogenesis	extracellular;nucleus;spliceosomal complex	protein binding;RNA binding	15		Molecules associated with elastic fibres	Canonical and Non-canonical Notch signaling		532504	826451	600226	326237	369670	461344	456940	322287	533517	772463	582152	281923		19.0224	19.6566	19.1951	18.3156	18.4959	18.8155	18.8016	18.298	19.0252	19.5591	19.151	18.1049		-0.12393	0.373031	-0.0912405	0.0952623	-0.260796	0.014789	-0.242561	0.277765	0.368634	0.582901	0.404406	0.0972583
Q15233	Non-POU domain-containing octamer-binding protein	NONO		defense response;metabolic process;regulation of biological process;response to stimulus	membrane;nucleus	DNA binding;protein binding;RNA binding	X			mRNA Processing		9.28262e+06	1.18394e+07	9.81007e+06	4.37538e+06	7.12501e+06	6.18828e+06	8.46187e+06	4.01436e+06	7.77101e+06	9.05111e+06	7.07975e+06	4.39158e+06		23.1461	23.4971	23.2258	22.061	22.7645	22.5611	23.0125	21.9367	22.8897	23.1097	22.7553	22.0663		3.99974	4.21356	3.93945	3.84068	4.00779	3.76041	3.96834	3.91652	4.23313	4.13346	4.00864	4.05863
Q96CU9	FAD-dependent oxidoreductase domain-containing protein 1	FOXRED1		cell organization and biogenesis;metabolic process;transport	membrane;mitochondrion	catalytic activity	11					307937	437545	468188	162916	334504	256887	185997	170132	197636	252309	223510	264842		18.2323	18.7391	18.8367	17.3138	18.3517	17.9708	17.5049	17.3763	17.5925	17.9448	17.77	18.0148		-0.914088	-0.544468	-0.449657	-0.906533	-0.405012	-0.829924	-1.53929	-0.64393	-1.06405	-1.03138	-0.976652	0.00709007
Q96T37	RNA-binding protein 15	RBM15		metabolic process;regulation of biological process	membrane;nucleus	protein binding;RNA binding	1					1.31557e+06	1.40849e+06	2.73543e+06	1.04362e+06	1.13429e+06	1.10668e+06	1.10024e+06	997046	1.12254e+06	1.16456e+06	1.2562e+06	729091		20.3273	20.4257	21.3833	19.9932	20.1134	20.0778	20.0694	19.9273	20.0983	20.1514	20.2606	19.4757		1.18089	1.14218	2.09695	1.77287	1.35668	1.27711	1.02518	1.90708	1.4418	1.17514	1.51401	1.46806
Q9BTX1	Nucleoporin NDC1	NDC1; TMEM48		cell organization and biogenesis;metabolic process;regulation of biological process;transport	cytoplasm;cytoskeleton;membrane;nucleus	structural molecule activity	1	RNA transport	Rev-mediated nuclear export of HIV RNA; ISG15 antiviral mechanism; NEP/NS2 Interacts with the Cellular Export Machinery; tRNA processing in the nucleus; Transcriptional regulation by small RNAs; Nuclear Pore Complex (NPC) Disassembly; Regulation of Glucokinase by Glucokinase Regulatory Protein; Vpr-mediated nuclear import of PICs; Regulation of HSF1-mediated heat shock response; snRNP Assembly; S…			594924	877224	509242	203269	389965	415008	557500	158224	481373	505857	536646	239954		19.1823	19.7426	18.958	17.633	18.573	18.6628	19.0886	17.2716	18.8768	18.9484	19.0336	17.8724		0.0359821	0.459046	-0.328394	-0.587268	-0.18369	-0.137916	0.0444081	-0.748612	0.220256	-0.0278363	0.28698	-0.135286
Q9Y679	Ancient ubiquitous protein 1											348137	339036	438435	151024	234210	276376	260319	142689	165298	160484	173942	108980		18.4093	18.3711	18.742	17.2044	17.8374	18.0763	17.9899	17.1225	17.3347	17.2921	17.4083	16.7337		-0.737069	-0.912459	-0.544383	-1.01588	-0.919235	-0.724425	-1.05428	-0.897704	-1.32183	-1.68414	-1.33838	-1.27398
Q9BWM7	Sideroflexin-3	SFXN3		transport	membrane;mitochondrion	transporter activity	10					389771	535702	809899	479104	597888	371274	418963	221821	345159	429849	515080	221205		18.5723	19.0311	19.6274	18.87	19.1895	18.5021	18.6765	17.759	18.3969	18.7135	18.9744	17.755		-0.574095	-0.25247	0.340997	0.649678	0.432841	-0.298572	-0.367742	-0.261186	-0.259638	-0.262733	0.227805	-0.25266
Q9UNP9	Peptidyl-prolyl cis-trans isomerase E	PPIE		metabolic process;regulation of biological process;response to stimulus;transport	cytosol;extracellular;nucleus;organelle lumen;spliceosomal complex	catalytic activity;protein binding;RNA binding	1	Spliceosome	Dual incision in TC-NER; Formation of TC-NER Pre-Incision Complex; Neutrophil degranulation; mRNA Splicing - Major Pathway; Gap-filling DNA repair synthesis and ligation in TC-NER			111446	432168	263348	123472	152115	137151	172481	106357	165842	232873	197940	114711		16.766	18.7212	18.0066	16.9138	17.2148	17.0654	17.3961	16.6986	17.3394	17.8292	17.5947	16.8076		-2.38037	-0.562306	-1.27978	-1.30648	-1.54188	-1.73529	-1.64813	-1.32166	-1.31709	-1.14702	-1.15192	-1.20004
[truncated: 1,242 more rows]
[truncated: 17 more columns]

## Sheet: Input_DMSO_vs_MS023
Accession	Description	Gene Symbol	Annotation	Biological Process	Cellular Component	Molecular Function	Chromosome	KEGG Pathways	Reactome Pathways	WikiPathways	Quantification	Input_DMSO_A1	Input_DMSO_B1	Input_DMSO_C1	Input_DMSO_D1	Input_GSK_A2	Input_GSK_B2	Input_GSK_C2	Input_GSK_D2	Input_MS023_A3	Input_MS023_B3	Input_MS023_C3	Input_MS023_D3	log2	Input_DMSO_A1	Input_DMSO_B1	Input_DMSO_C1	Input_DMSO_D1	Input_GSK_A2	Input_GSK_B2	Input_GSK_C2	Input_GSK_D2	Input_MS023_A3	Input_MS023_B3	Input_MS023_C3	Input_MS023_D3	Normalize	Input_DMSO_A1	Input_DMSO_B1	Input_DMSO_C1	Input_DMSO_D1	Input_GSK_A2	Input_GSK_B2	Input_GSK_C2	Input_GSK_D2	Input_MS023_A3	Input_MS023_B3	Input_MS023_C3	Input_MS023_D3
[truncated: 1,832 more rows]
[truncated: 17 more columns]

[truncated: 3 more sheets: polyA_DMSO_vs_GSK591, polyA_DMSO_vs_MS023, Raw data]
