# Supplementary material for: Type I and II PRMTs inversely regulate post-transcriptional intron detention through Sm and CHTOP methylation
Source: eLife. 2022 Jan 5;11:e72867. doi: 10.7554/eLife.72867 (PMC8765754; doi:10.7554/eLife.72867)
Supplement: Supplementary file 2. [file elife-72867-supp2.xlsx]

## Sheet: Sheet1
Target	Sequence
ANKZF1 Exon 9 - Intron 9 FWD	GTCAGACTGCACTCACCTCA
ANKZF1 Exon 9 - Intron 9 REV	GTAGGGAATTTGCCAGTGCAT
ANKZF1 Intron 9 - Exon 10 FWD	GGACTCAGCTCTTGATGTGCTA
ANKZF1 Intron 9 - Exon 10 REV	AAGCCATCTTCTCCCTCCGA
ANKZF1 Exon 10 FWD	GTTGACTGTGGGGACTCTGG
ANKZF1 Exon 10 REV	GACTGTGTGGAAGGCTCCTC
ANKZF1 Exon 12 - Intron 12 FWD	GGAGGAGCGTGAACGAGAAG
ANKZF1 Exon 12 - Intron 12 REV	CTGGGGAAGGGGTTAGACCT
ANKZF1 Intron 12 - Exon 13 FWD	GGTGCCCTACTCGCCAC
ANKZF1 Intron 12 - Exon 13 REV	GACGATTGCAGAGTCAGGGATT
NOP2 Exon 13 - Intron 14 FWD	AGTTTCCAGCTCTACGAGACCC
NOP2 Exon 13 - Intron 14 REV	AGCCGTGAAGACTAACAAGGT
NOP2 Intron 14 - Exon 14 FWD	ACTCCTTCTGGAGGTGAGCA
NOP2 Intron 14 - Exon 14 REV	GGCTGCCTTTGGGTCTCTTT
NOP2 Exon 14 - Intron 14 FWD	TGTGCTCACCTCCAGAAGGA
NOP2 Exon 14 - Intron 14 REV	AGGGAGCTCTAAGGGGCAAA
NOP2 Intron 14 - Exon 15 FWD	TCCGTTCTTTGTCTTCCCCC
NOP2 Intron 14 - Exon 15 REV	ACCAGTCGCACATTCCTCTT
NOP2 Exon 15 FWD	AGAGGAATGTGCGACTGGTG
NOP2 Exon 15 REV	GTAGAACGCAGACTGGGGTG
GAS5 Exon 4 - Intron 4 FWD	AAGAGGGGAGAGAAGCACTAACAT
GAS5 Exon 4 - Intron 4 REV	ACACAGGTGAGACACCTCTATTT
GAS5 Intron 4 - Exon 5 FWD	TCCAGCTTTCTGTCTAATGCCT
GAS5 Intron 4 - Exon 5 REV	TGGTTAAGCAGTGTACCACCA
GAS5 Exon 9 - Intron 9 FWD	ACCAAAACCTTTTGCCACCT
GAS5 Exon 9 - Intron 9 REV	ATTCATGATTGAAGAAATGCAGGTT
GAS5 Intron 9 - Exon 10 FWD	ACAGGTCTGCCTGTTTGAAGAT
GAS5 Intron 9 - Exon 10 REV	ACTGAGAAGGAAATTGAGTAGGGC
GAS5 Exon 9/10 - Exon 11 FWD	AGAAATGCAGGCAGACCTGTT
GAS5 Exon 9/10 - Exon 11 REV	TAAGCTGCATGCTTGCTTGTTG
HNRNPH1 Exon 13 - Intron 13 FWD	AGAGAAAAGGCATACAAGGTTAGC
HNRNPH1 Exon 13 - Intron 13 REV	GTGGTGCTTACGGTAGCCAA
HNRNPH1 Intron 13 - Exon 14 FWD	ATGCCTCCCATCATTTGGCT
HNRNPH1 Intron 13 - Exon 14 REV	GCTAACCTTGTATGCCTTTTCTCT
HNRNPH1 Exon 14 - Intron 14 FWD	TCAAGAAACTGCTTTGCCTAAGTT
HNRNPH1 Exon 14 - Intron 14 REV	GGAGGCATGGGCTTGTGTAA
HNRNPH1 Intron 14 - Exon 15 FWD	CCTCCGTAACCCCCACTCA
HNRNPH1 Intron 14 - Exon 15 REV	CCACCAGGTACCACATCACAT
HNRNPH1 Exon 14 - Exon 15 FWD	GGTGGTGCTTACGAACACAG
HNRNPH1 Exon 14 - Exon 15 REV	GTTTGACAAGCCCATGCCTC
Endogenous CHTOP FWD	GAGCTCGCATACTACCGCTT
Endogenous CHTOP REV	CGAATCCCGAGAATCGAAGGA
Exogenous CHTOP FWD	TGGACTACAAAGACCATGACGG
Exogenous CHTOP REV	AATATTCACTGGCGTCGGCT
Sm Expression Vector FWD	TGGACTACAAAGACGATGACGA
Sm Expression Vector REV	TCCCCCGATATACCTCACCG
SNRPB FWD	ACGGCCGGATCTTCATTGG
SNRPB REV	ACCGAGGACTCGCTTCTCTT
SNRPD1 FWD	CCTGTACAGCTGGAAACGCT
SNRPD1 REV	TCACCTTAGGTTCAACATCCACA
SNRPD3 FWD	CGGTGAGGTATATCGGGGGA
SNRPD3 REV	GGTGCGTTCTTCAGCATGTC
PRMT1 FWD	GAGGAGTAGGTGCGGGTGA
PRMT1 REV	CGTCCTTCAGCATCTCCTCG
PRMT4 FWD	CGCCCTCTACAGCCATGAAG
PRMT4 REV	ACTGGATGAGGACGCTGTTG
PRMT5 FWD	CAGCATACAGCTTTATCCGCCG
PRMT5 REV	CTAGACCGAGTACCAGAAGAGG
PRMT1 gRNA 1 5-3'	caccgGGCCGCGAACTGCATCATGG
PRMT1 gRNA 1 3-5'	aaacCCATGATGCAGTTCGCGGCCc
PRMT1 gRNA 2 5-3'	caccgCACCTCCATGATGCAGTTCG
PRMT1 gRNA 2 3-5'	aaacCGAACTGCATCATGGAGGTGc
PRMT4 gRNA 1 5-3'	caccgGGCGGCGGTAGCGGCAGCGG
PRMT4 gRNA 1 3-5'	aaacCCGCTGCCGCTACCGCCGCCc
PRMT4 gRNA 2 5-3'	caccgCTCGGCCTCGGCCTGCACGG
PRMT4 gRNA 2 3-5'	aaacCCGTGCAGGCCGAGGCCGAGc
PRMT5 gRNA 1 5-3'	caccgGGACAGCGCGAGGAGAAAGA
PRMT5 gRNA 1 3-5'	aaacTCTTTCTCCTCGCGCTGTCCc
PRMT5 gRNA 2 5-3'	caccgGGTGGGAGCCGCGTGTCCAG
PRMT5 gRNA 2 3-5'	aaacCTGGACACGCGGCTCCCACCc
Scrambled gRNA 5-3'	caccgGTGTAGTTCGACCATTCGTG
Scrambled gRNA 3-5'	aaacCACGAATGGTCGAACTACACc
Actin FWD	AGCTACGAGCTGCCTGAC
Actin REV	AAGGTAGTTTCGTGGATGC
U1 Northern Probe	CATCCGGAGTGCAATGGATAAGCCTCGCCCTGGGAAAACCACCTTCGTGATCATGGTATCTCCCCTGCCAGGTAAGTATC
U2 Northern Probe	ATTGTCCTCGGATAGAGGACGTATCAGATATTAAACTGATAAGAACAGATACTACACTTGATCTTAGCCAAAAGGCCGAGAAGCG
U4 Northern Probe	CGGGGTATTGGGAAAAGTTTTCAATTAGCAATAATCGCGCCTCGGATAAACCTCATTGGCTACGATACTGCCACTGCGCAAAGCT
U5 Northern Probe	TTGGGTTAAGACTCAGAGTTGTTCCTCTCCACGGAAATCTTTAGTAAAAGGCGAAAGATTTATGCGATCTG
U6 Northern Probe	CGTGTCATCCTTGCGCAGGGGCCATGCTAATCTTCTCTGTATCGTTCCAATTTTAGTATATGTGCTGCCGAAGCGAGCAC
