# Supplementary material for: Type I and II PRMTs inversely regulate post-transcriptional intron detention through Sm and CHTOP methylation
Source: eLife. 2022 Jan 5;11:e72867. doi: 10.7554/eLife.72867 (PMC8765754; doi:10.7554/eLife.72867)
Supplement: Supplementary file 3. [file elife-72867-supp3.xlsx]

## Sheet: Sheet1
Accession	Study
GSE93813	Braun et al. 2017
GSE129652	Radzisheuskaya et al. 2019
GSE123774	Fong et al. 2019
GSE126651	Fedoriw et al. 2019
PRJEB10298	Correa et al. 2016
PRJNA136533	Saltzman et al. 2011
PRJNA454668	Viphakone et al. 2019
PRJNA451115	Fan et al. 2019
ENCSR000CTL	ENCODE
ENCSR000CTM	ENCODE
