# Supplementary figures and images for: Type I and II PRMTs inversely regulate post-transcriptional intron detention through Sm and CHTOP methylation
Source: eLife journal article supplement (doi:10.7554/elife.72867), 2022-01-05

c

Chemiluminescence

Digital

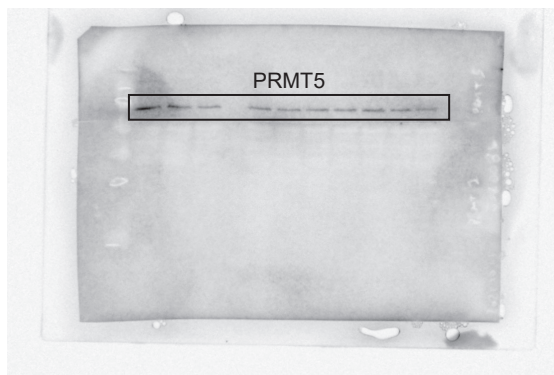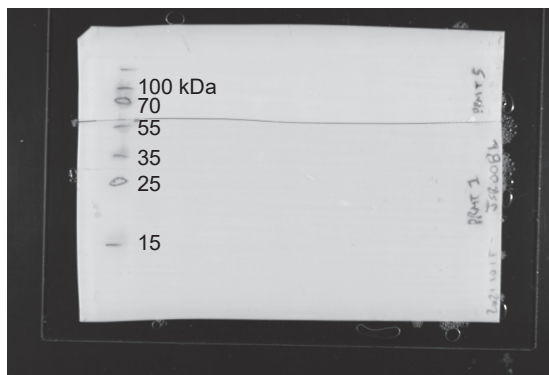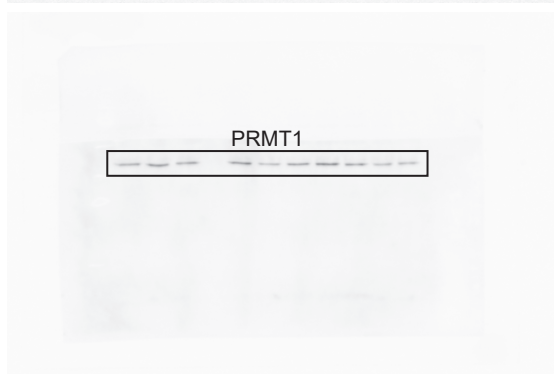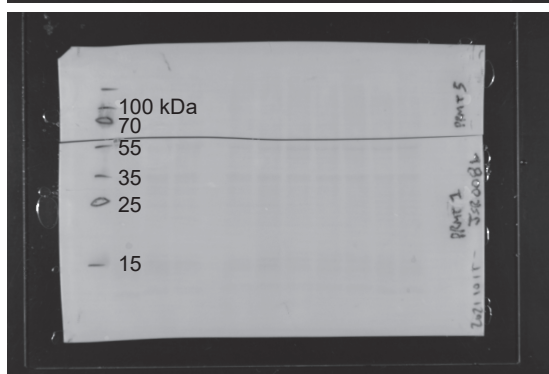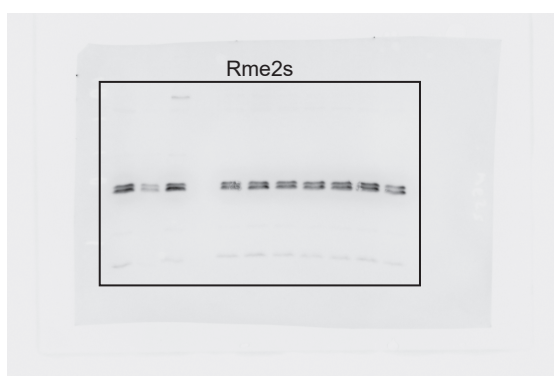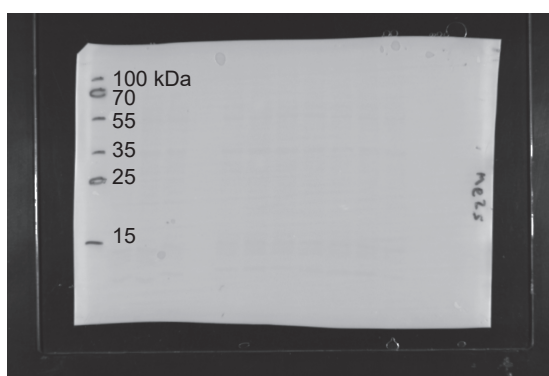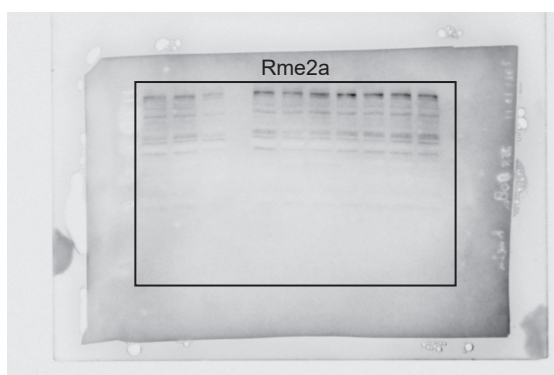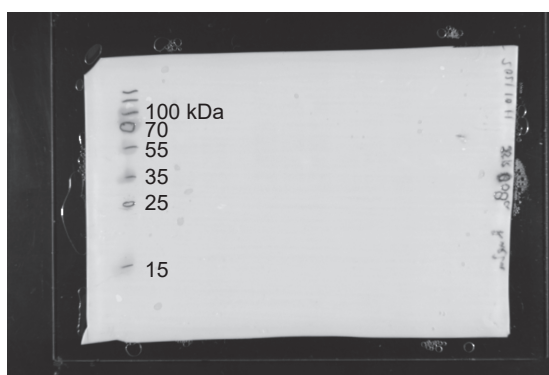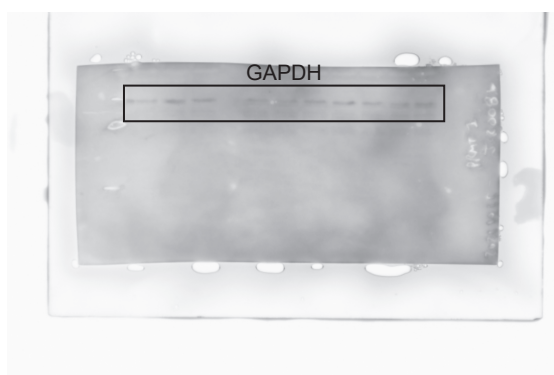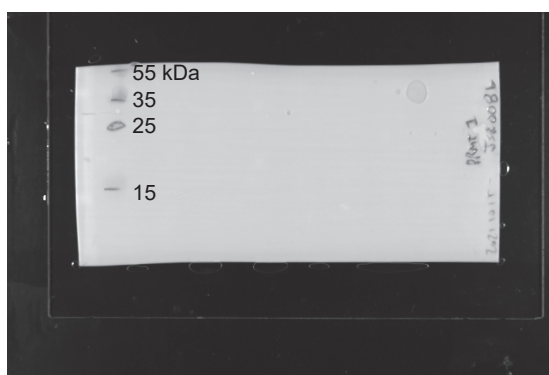

Supplement: fig1-figsupp1-data1 [file elife-72867-fig1-figsupp1-data1-v2.zip]

f

Chemiluminescence

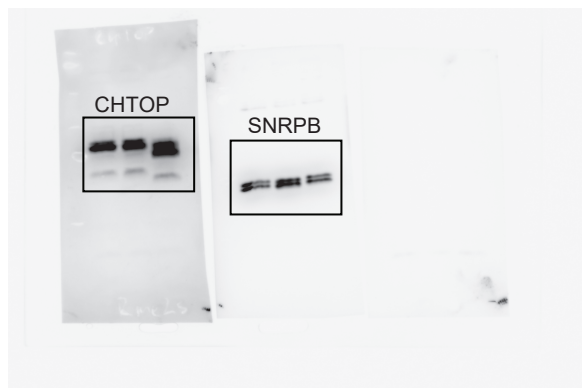

Digital

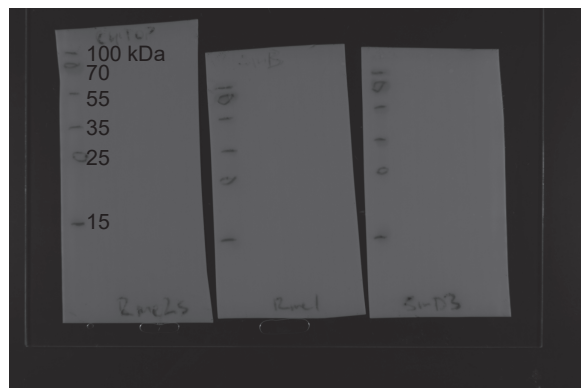

Direct Blue 71 Membrane Stain

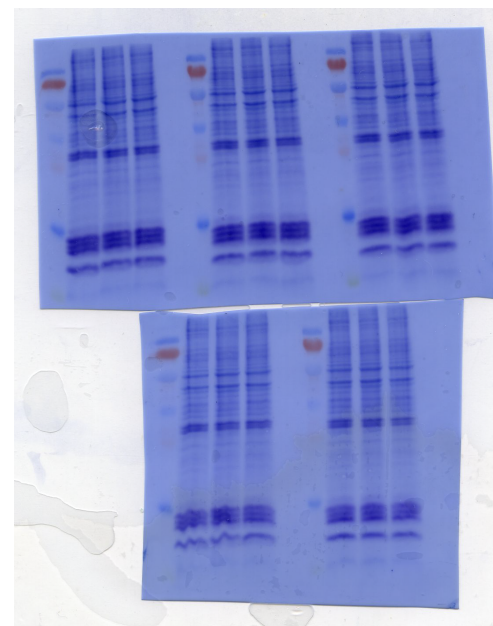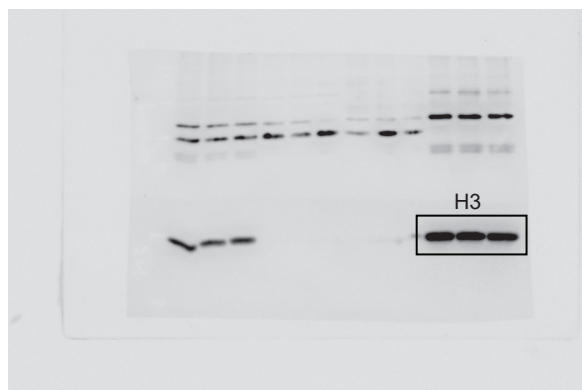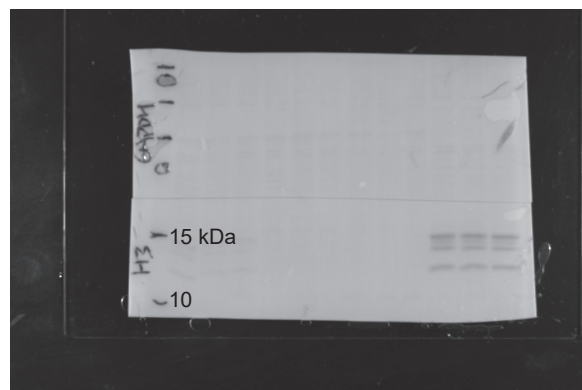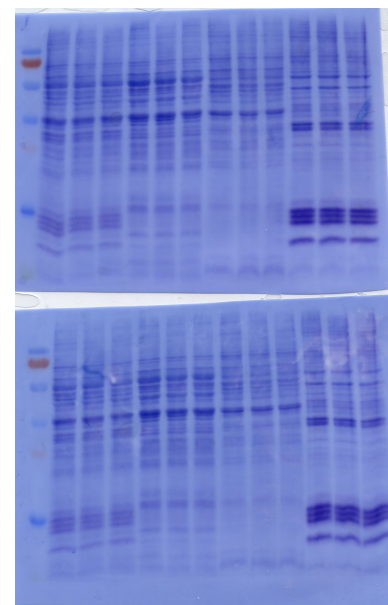

Supplement: fig4-data1 [file Figure 4-source data 1.pdf › Figure4-source data1/Figure 4-source data 1.pdf]

g

Chemiluminescence

Digital

Direct Blue 71 Membrane Stain

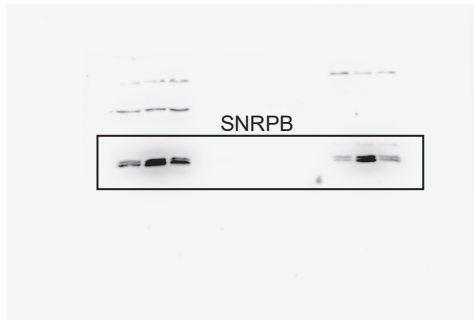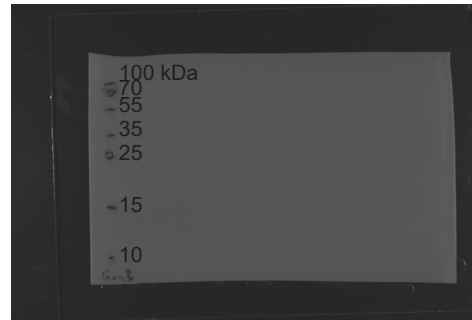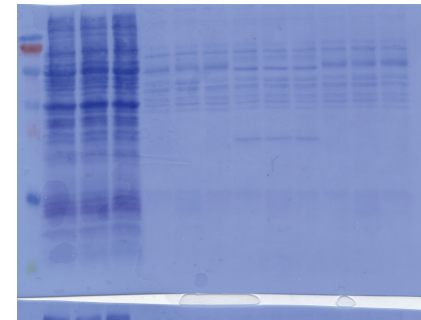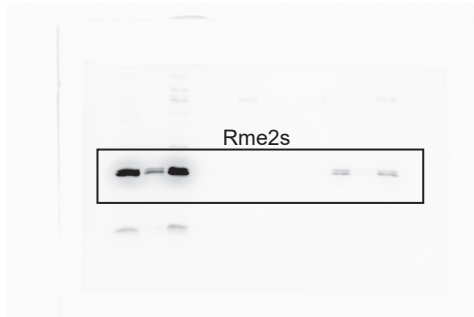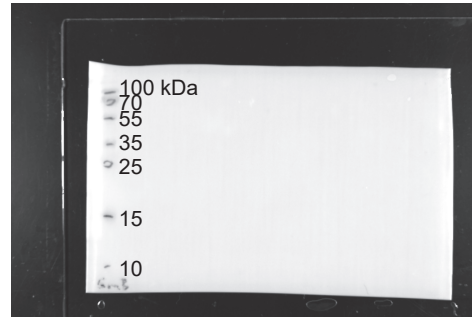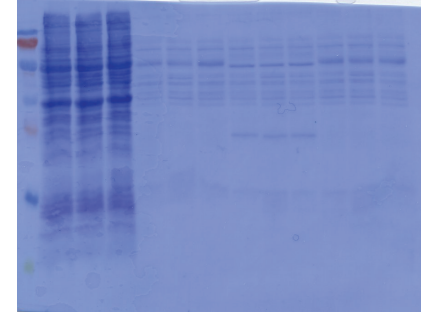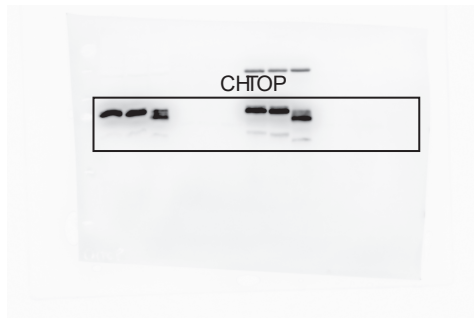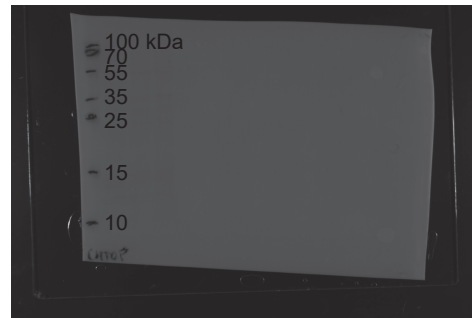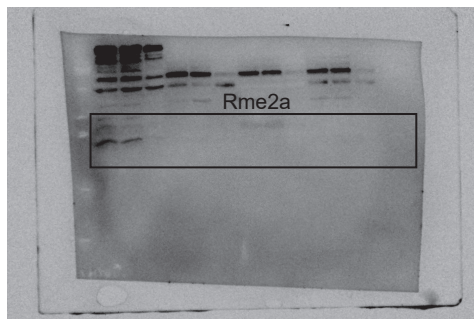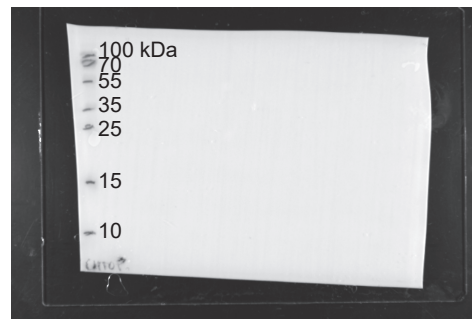

Supplement: fig4-data2 [file Figure 4-source data 2.pdf › Figure4-source data2/Figure 4-source data 2.pdf]

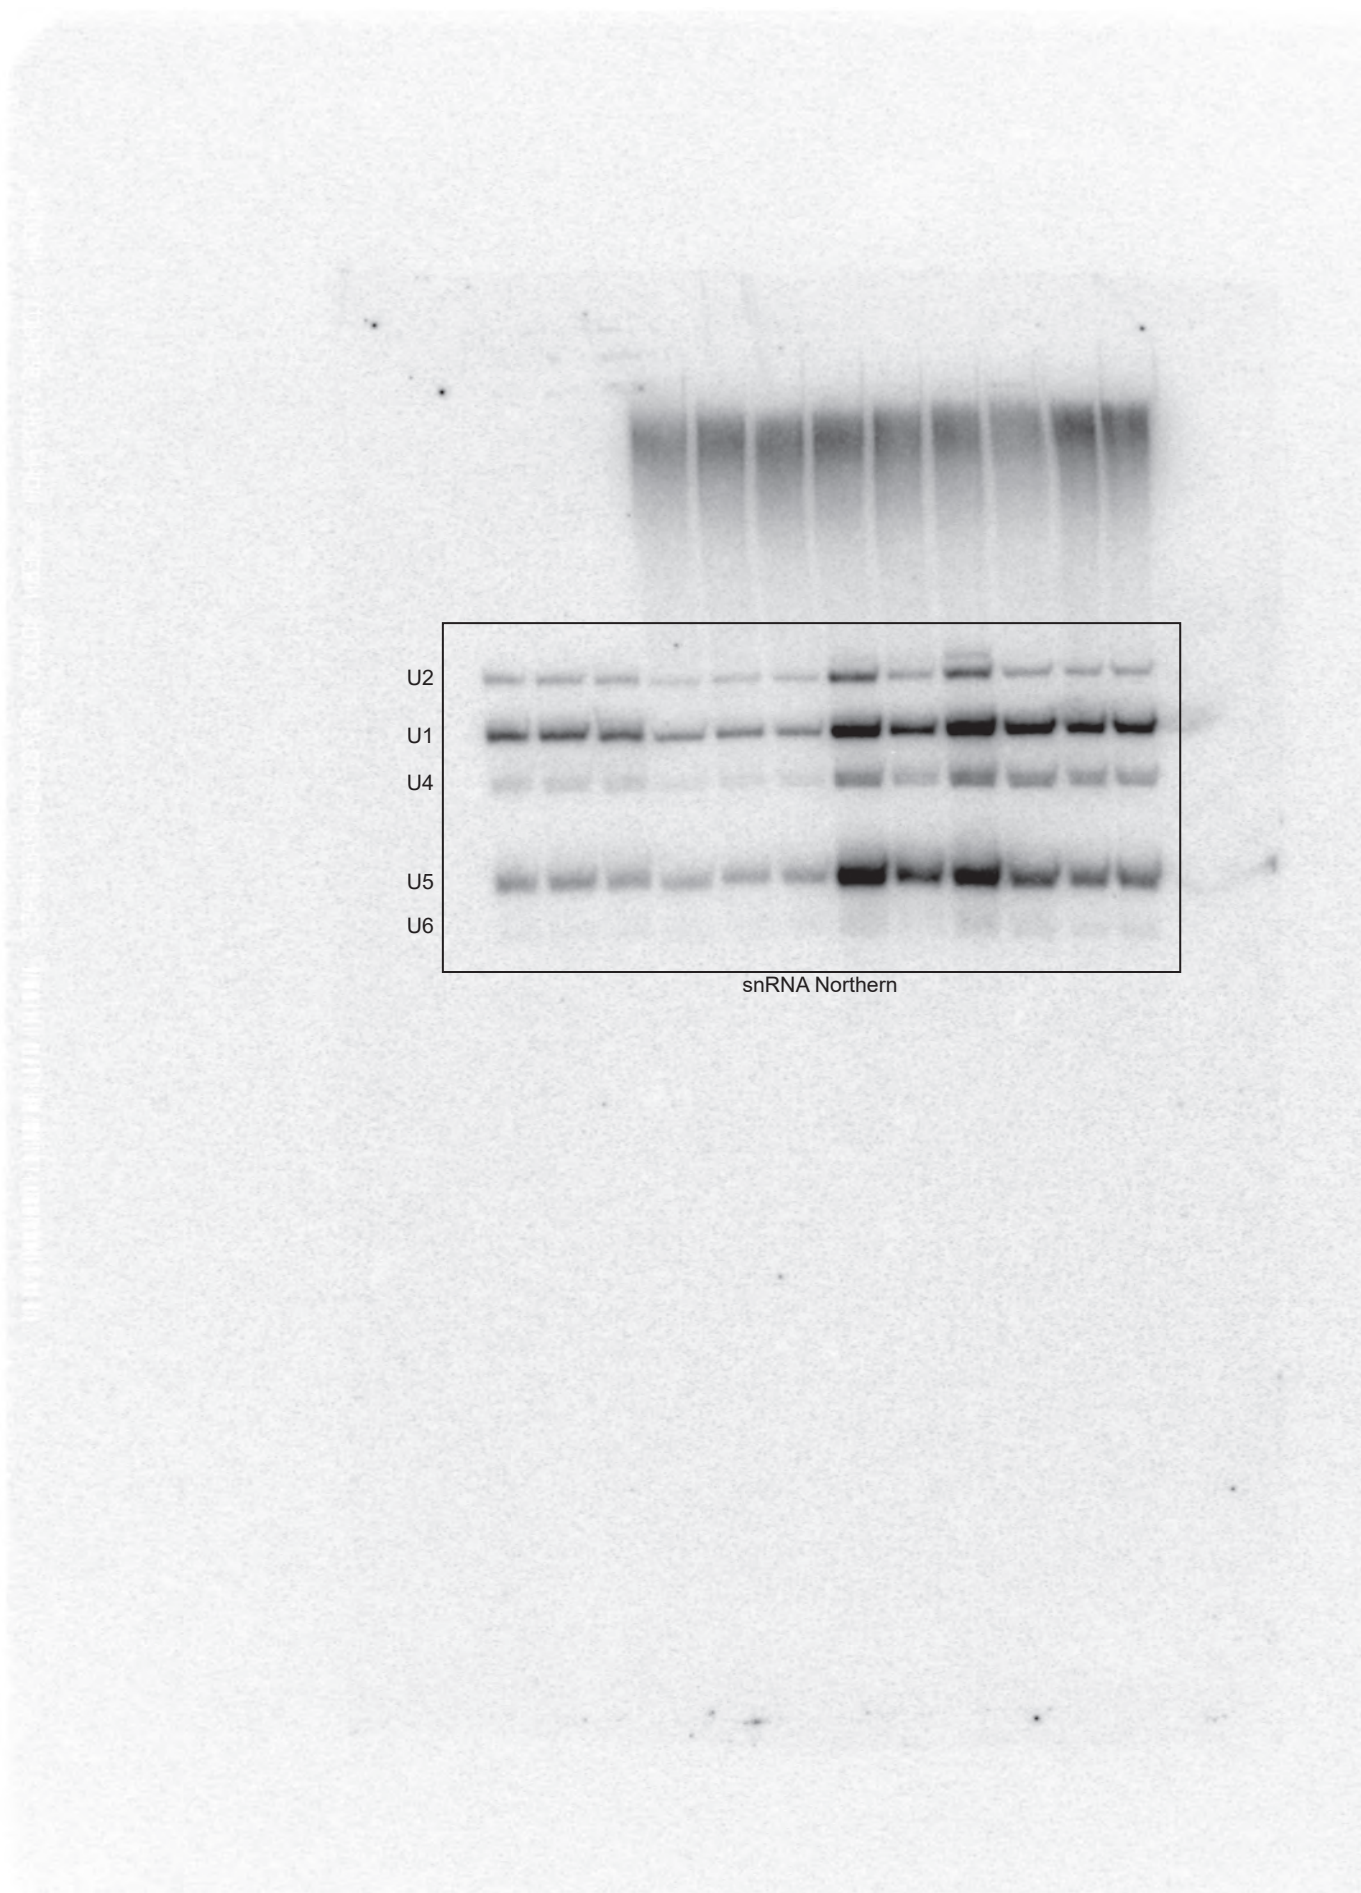

Supplement: fig5-figsupp2-data2 [file Figure 5-Figure Supplement 2-source data 2.pdf › Figure5-figure_supplement_2-source data2/Figure 5-Figure Supplement 2-source data 2.pdf]

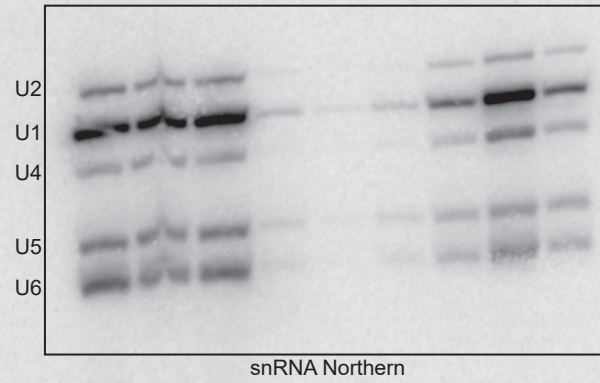

Supplement: fig5-figsupp2-data3 [file elife-72867-fig5-figsupp2-data3-v2.zip]

**d**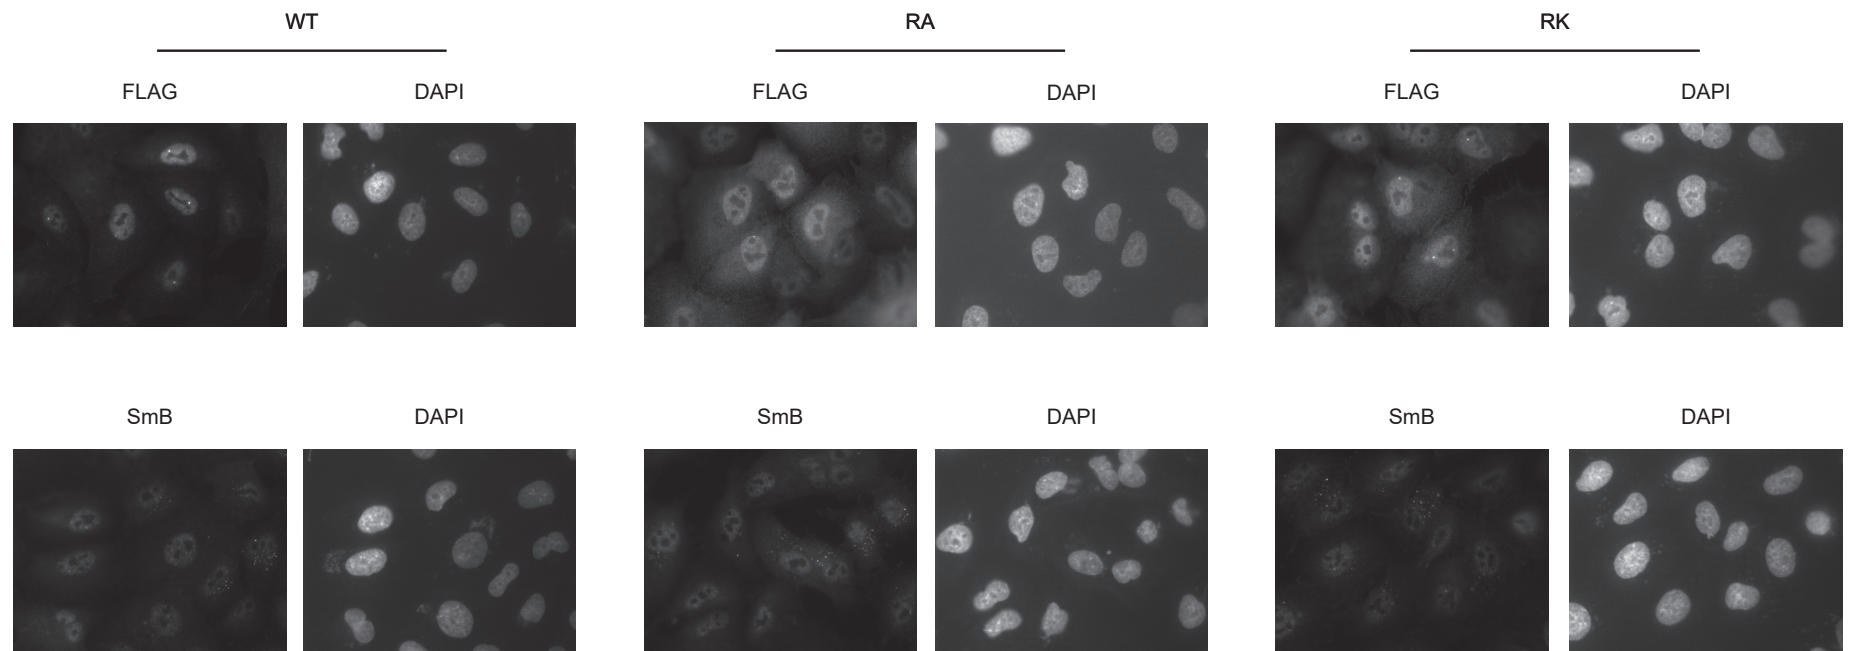

Supplement: fig5-figsupp2-data4 [file elife-72867-fig5-figsupp2-data4-v2.zip]

e

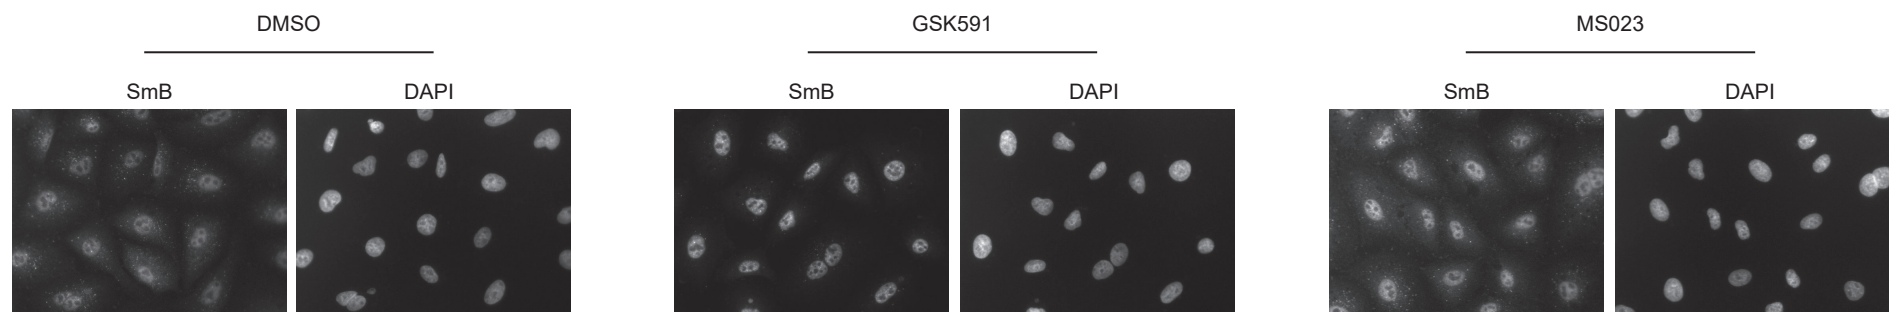

Supplement: fig5-figsupp2-data5 [file Figure5-figure_supplement_2-data5.pdf › Figure5-figure_supplement_2-source data5/Figure5-figure_supplement_2-data5.pdf]

c

Chemiluminescence

Digital

Direct Blue 71 Membrane Stain

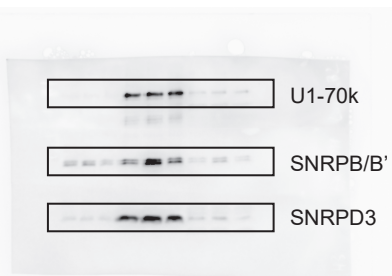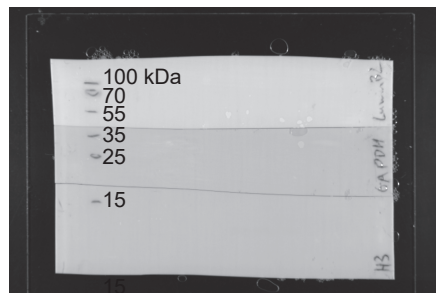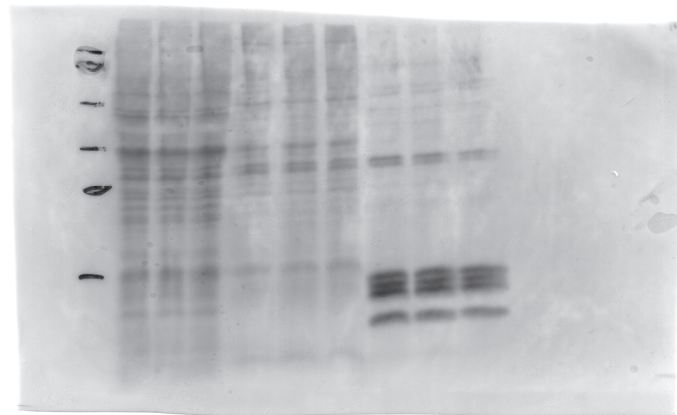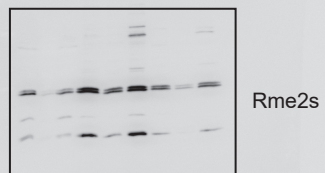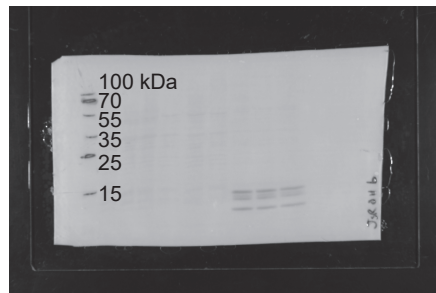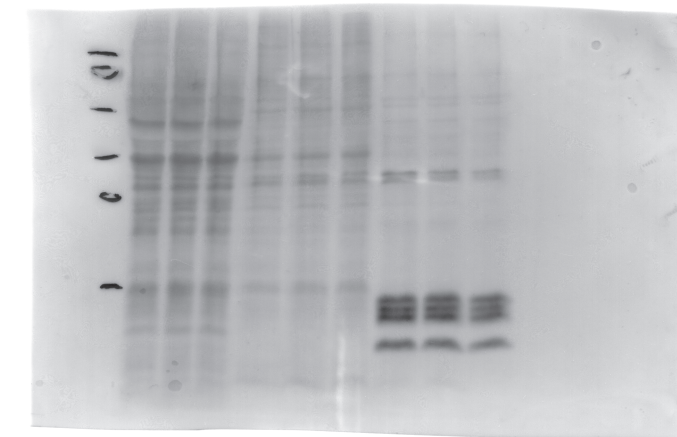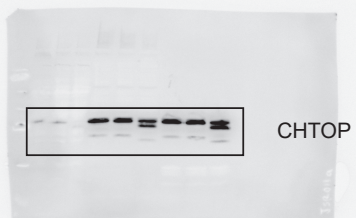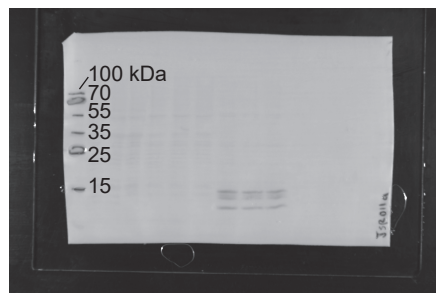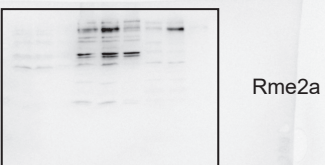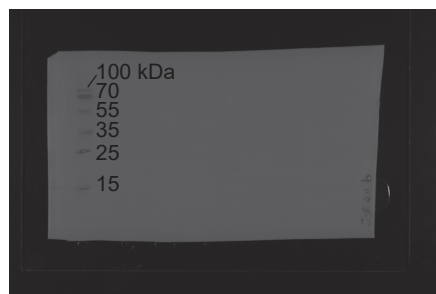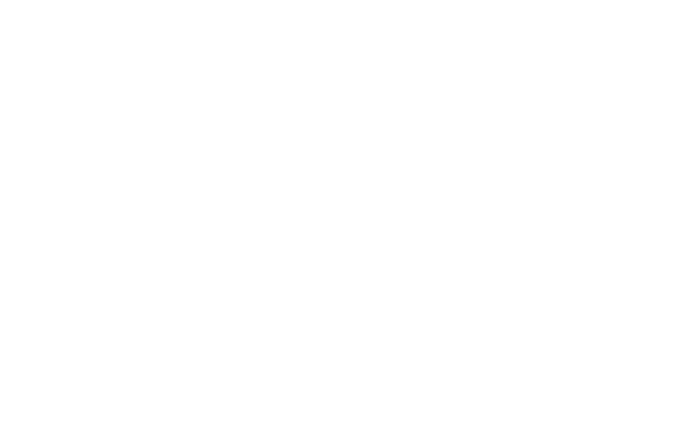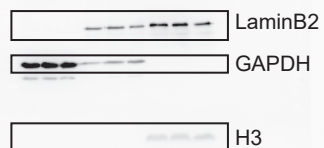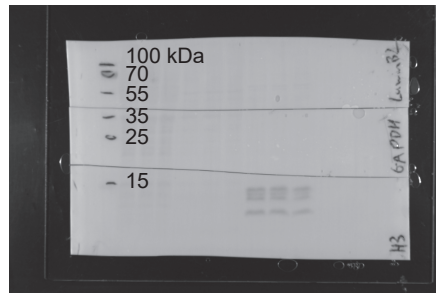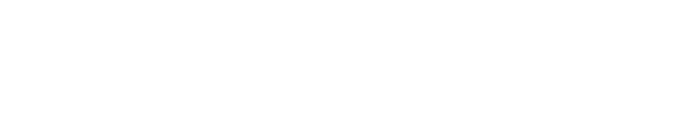

Supplement: fig6-data1 [file elife-72867-fig6-data1-v2.zip]
